# Supplementary material
Source: publisher figshare collection journal article supplement (https://acs.figshare.com/ndownloader/files/6979427)
Supplement: Supplementary file 1 [file 6979427]

data_srl268_jcmv50
_audit_creation_date              2016-09-09
_audit_creation_method
;
Olex2 1.2
(compiled 2016.09.09 svn.r3337 for OlexSys, GUI svn.r5227)
;
loop_
  _publ_author_name
  _publ_author_email
  _publ_author_address
 'Gamez, R.' rociogm@ugto.mx
;
Noria Alta S/N, Col. Noria Alta 
Guanajuato
36050
Mexico
;

_publ_contact_author_address
;
Noria Alta S/N, Col. Noria Alta 
Guanajuato
36050
Mexico
;
_publ_contact_author_email        rociogm@ugto.mx
_publ_contact_author_id_orcid     ''
_publ_contact_author_name         'Gamez, R.'
_publ_contact_author_phone        '+52 473 732 0006 x8191'
_publ_requested_journal           ?
_publ_section_references
;
Dolomanov, O.V., Bourhis, L.J., Gildea, R.J, Howard, J.A.K. & Puschmann, H.
 (2009), J. Appl. Cryst. 42, 339-341.

Sheldrick, G.M. (2008). Acta Cryst. A64, 112-122.

Sheldrick, G.M. (2015). Acta Cryst. C71, 3-8.
;
_chemical_name_common             ?
_chemical_name_systematic
'2-(1-(1-cyclohexyl-1H-tetrazol-5-yl)-2,2-dimethylpropyl)-3-oxoisoindoline-4-carboxylic acid'
_chemical_formula_moiety          'C21 H27 N5 O3'
_chemical_formula_sum             'C21 H27 N5 O3'
_chemical_formula_weight          397.47
_chemical_melting_point           '486'
_chemical_oxdiff_formula          'C19 H26 N5 O1'
_chemical_oxdiff_usercomment      ' '
loop_
  _atom_type_symbol
  _atom_type_description
  _atom_type_scat_dispersion_real
  _atom_type_scat_dispersion_imag
  _atom_type_scat_source
 'C' 'C' 0.0181 0.0091 'International Tables Vol C Tables 4.2.6.8 and 6.1.1.4'
 'H' 'H' 0.0000 0.0000 'International Tables Vol C Tables 4.2.6.8 and 6.1.1.4'
 'N' 'N' 0.0311 0.0180 'International Tables Vol C Tables 4.2.6.8 and 6.1.1.4'
 'O' 'O' 0.0492 0.0322 'International Tables Vol C Tables 4.2.6.8 and 6.1.1.4'

_shelx_space_group_comment
;
The symmetry employed for this shelxl refinement is uniquely defined
by the following loop, which should always be used as a source of
symmetry information in preference to the above space-group names.
They are only intended as comments.
;
_space_group_crystal_system       'triclinic'
_space_group_IT_number            2
_space_group_name_H-M_alt         'P -1'
_space_group_name_Hall            '-P 1'
loop_
  _space_group_symop_operation_xyz
 'x, y, z'
 '-x, -y, -z'

_cell_length_a                    9.2469(4)
_cell_length_b                    10.8452(4)
_cell_length_c                    11.8162(5)
_cell_angle_alpha                 102.960(4)
_cell_angle_beta                  104.714(4)
_cell_angle_gamma                 107.837(4)
_cell_volume                      1030.65(8)
_cell_formula_units_Z             2
_cell_measurement_reflns_used     7204
_cell_measurement_temperature     291
_cell_measurement_theta_max       77.2740
_cell_measurement_theta_min       4.0360
_shelx_estimated_absorpt_T_max    ?
_shelx_estimated_absorpt_T_min    ?
_exptl_absorpt_coefficient_mu     0.715
_exptl_absorpt_correction_T_max   1.00000
_exptl_absorpt_correction_T_min   0.62176
_exptl_absorpt_correction_type    multi-scan
_exptl_absorpt_process_details
'CrysAlisPro 1.171.38.43 (Rigaku Oxford Diffraction, 2015) Empirical absorption correction using spherical harmonics, implemented in SCALE3 ABSPACK scaling algorithm.'
_exptl_absorpt_special_details    ?
_exptl_crystal_colour             'clear light colourless'
_exptl_crystal_colour_lustre      clear
_exptl_crystal_colour_modifier    light
_exptl_crystal_colour_primary     colourless
_exptl_crystal_density_diffrn     1.281
_exptl_crystal_density_meas       ?
_exptl_crystal_density_method     ?
_exptl_crystal_description        prism
_exptl_crystal_F_000              424
_exptl_crystal_recrystallization_method
'Crystal were obteined from Hexanos / CH2Cl2 / CDCl3 (80/10/10; v/v/v)'
_exptl_crystal_size_max           0.2
_exptl_crystal_size_mid           0.2
_exptl_crystal_size_min           0.1
_exptl_transmission_factor_max    ?
_exptl_transmission_factor_min    ?
_diffrn_reflns_av_R_equivalents   0.0319
_diffrn_reflns_av_unetI/netI      0.0208
_diffrn_reflns_Laue_measured_fraction_full 1.000
_diffrn_reflns_Laue_measured_fraction_max 0.989
_diffrn_reflns_limit_h_max        11
_diffrn_reflns_limit_h_min        -11
_diffrn_reflns_limit_k_max        13
_diffrn_reflns_limit_k_min        -13
_diffrn_reflns_limit_l_max        14
_diffrn_reflns_limit_l_min        -14
_diffrn_reflns_number             21428
_diffrn_reflns_point_group_measured_fraction_full 1.000
_diffrn_reflns_point_group_measured_fraction_max 0.989
_diffrn_reflns_theta_full         67.684
_diffrn_reflns_theta_max          77.512
_diffrn_reflns_theta_min          4.095
_diffrn_ambient_temperature       291
_diffrn_detector                  'CCD plate'
_diffrn_detector_area_resol_mean  10.3659
_diffrn_detector_type             Atlas
_diffrn_measured_fraction_theta_full 1.000
_diffrn_measured_fraction_theta_max 0.989
_diffrn_measurement_details
;
List of Runs (angles in degrees, time in seconds):

  # Type    Start    End  Width  t~exp~   \w     \q     \k     \f   Frames
--------------------------------------------------------------------------
  1  \w   -117.00 -18.00   1.00    1.11    --  -42.36 -38.00  30.00   99
  2  \w    -71.00  31.00   1.00    1.11    --  -42.36  57.00 -60.00  102
  3  \w    -50.00  32.00   1.00    1.11    --  -42.36  38.00-180.00   82
  4  \w    -50.00  32.00   1.00    1.11    --  -42.36  38.00-150.00   82
  5  \w     53.00 130.00   1.00    1.11    --   42.36-178.00  60.00   77
  6  \w     57.00 131.00   1.00    1.11    --   42.36 178.00-150.00   74
  7  \w     41.00  98.00   1.00    4.43    --  114.00 -45.00 -30.00   57
  8  \w     41.00 121.00   1.00    4.43    --  114.00-125.00 -90.00   80
  9  \w     41.00  98.00   1.00    4.43    --  114.00 -45.00 120.00   57
 10  \w     42.00 143.00   1.00    4.43    --  114.00 -61.00 -30.00  101
 11  \w     31.00 109.00   1.00    4.43    --  114.00 -94.00-180.00   78
 12  \w     86.00 178.00   1.00    4.43    --  114.00  30.00 -30.00   92
 13  \w     41.00  98.00   1.00    4.43    --  114.00 -45.00  60.00   57
 14  \w     31.00 109.00   1.00    4.43    --  114.00 -94.00 -60.00   78
 15  \w     31.00 109.00   1.00    4.43    --  114.00 -94.00  90.00   78
 16  \w     31.00 109.00   1.00    4.43    --  114.00 -94.00 150.00   78
 17  \w     61.00 178.00   1.00    4.43    --  114.00  15.00-150.00  117
 18  \w     38.00  91.00   1.00    4.43    --  114.00 -30.00-180.00   53
 19  \w     86.00 178.00   1.00    4.43    --  114.00  30.00  30.00   92
 20  \w     42.00 143.00   1.00    4.43    --  114.00 -61.00-150.00  101
 21  \w     41.00 121.00   1.00    4.43    --  114.00-125.00 -30.00   80
 22  \w     41.00 121.00   1.00    4.43    --  114.00-125.00  60.00   80
 23  \w     38.00  91.00   1.00    4.43    --  114.00 -30.00-150.00   53
 24  \w     86.00 178.00   1.00    4.43    --  114.00  30.00  90.00   92
 25  \w   -119.00 -10.00   1.00    1.11    --  -42.36 -77.00 -90.00  109
 26  \w   -119.00 -10.00   1.00    1.11    --  -42.36 -77.00 150.00  109
 27  \w   -115.00 -14.00   1.00    1.11    --  -42.36 -57.00-150.00  101
 28  \w   -115.00 -14.00   1.00    1.11    --  -42.36 -57.00 -60.00  101
 29  \w   -119.00 -10.00   1.00    1.11    --  -42.36 -77.00-180.00  109
 30  \w   -119.00 -10.00   1.00    1.11    --  -42.36 -77.00  60.00  109
 31  \w   -116.00 -55.00   1.00    1.11    --  -42.36-152.00 -82.00   61
 32  \w     85.00 178.00   1.00    4.43    --  114.00  61.00-180.00   93
 33  \w     85.00 178.00   1.00    4.43    --  114.00  61.00  30.00   93
 34  \w     85.00 178.00   1.00    4.43    --  114.00  61.00 -30.00   93
 35  \w     85.00 178.00   1.00    4.43    --  114.00  61.00 -90.00   93
 36  \w     85.00 178.00   1.00    4.43    --  114.00  61.00-150.00   93
 37  \w     88.00 178.00   1.00    4.43    --  114.00  45.00 120.00   90
 38  \w     85.00 178.00   1.00    4.43    --  114.00  61.00  90.00   93
 39  \w     86.00 178.00   1.00    4.43    --  114.00  30.00 -90.00   92
;
_diffrn_measurement_device        'four-circle diffractometer'
_diffrn_measurement_device_type   'Xcalibur, Atlas, Gemini'
_diffrn_measurement_method        '\w scans'
_diffrn_orient_matrix_type
'CrysAlisPro convention (1999,Acta A55,543-557)'
_diffrn_orient_matrix_UB_11       0.1260754000
_diffrn_orient_matrix_UB_12       -0.0491417000
_diffrn_orient_matrix_UB_13       0.0671635000
_diffrn_orient_matrix_UB_21       0.0105872000
_diffrn_orient_matrix_UB_22       -0.0691205000
_diffrn_orient_matrix_UB_23       -0.1249493000
_diffrn_orient_matrix_UB_31       0.1372566000
_diffrn_orient_matrix_UB_32       0.1332689000
_diffrn_orient_matrix_UB_33       0.0154506000
_diffrn_radiation_monochromator   graphite
_diffrn_radiation_probe           x-ray
_diffrn_radiation_type            CuK\a
_diffrn_radiation_wavelength      1.54184
_diffrn_source                    'fine-focus sealed X-ray tube'
_diffrn_source_type               'Enhance (Cu) X-ray Source'
_reflns_Friedel_coverage          0.000
_reflns_Friedel_fraction_full     .
_reflns_Friedel_fraction_max      .
_reflns_number_gt                 3586
_reflns_number_total              4353
_reflns_odcompleteness_completeness 99.98
_reflns_odcompleteness_iscentric  1
_reflns_odcompleteness_theta      74.33
_reflns_special_details
;
 Reflections were merged by SHELXL according to the crystal
 class for the calculation of statistics and refinement.
 
 _reflns_Friedel_fraction is defined as the number of unique
 Friedel pairs measured divided by the number that would be
 possible theoretically, ignoring centric projections and
 systematic absences.
;
_reflns_threshold_expression      'I > 2\s(I)'
_computing_cell_refinement        'CrysAlisPro 1.171.38.43 (Rigaku OD, 2015)'
_computing_data_collection        'CrysAlisPro 1.171.38.43 (Rigaku OD, 2015)'
_computing_data_reduction         'CrysAlisPro 1.171.38.43 (Rigaku OD, 2015)'
_computing_molecular_graphics     'Olex2 (Dolomanov et al., 2009)'
_computing_publication_material   'Olex2 (Dolomanov et al., 2009)'
_computing_structure_refinement   'ShelXL (Sheldrick, 2015)'
_computing_structure_solution     'ShelXS (Sheldrick, 2008)'
_refine_diff_density_max          0.247
_refine_diff_density_min          -0.194
_refine_diff_density_rms          0.040
_refine_ls_extinction_coef        .
_refine_ls_extinction_method      none
_refine_ls_goodness_of_fit_ref    1.038
_refine_ls_hydrogen_treatment     constr
_refine_ls_matrix_type            full
_refine_ls_number_parameters      266
_refine_ls_number_reflns          4353
_refine_ls_number_restraints      0
_refine_ls_R_factor_all           0.0513
_refine_ls_R_factor_gt            0.0416
_refine_ls_restrained_S_all       1.038
_refine_ls_shift/su_max           0.000
_refine_ls_shift/su_mean          0.000
_refine_ls_structure_factor_coef  Fsqd
_refine_ls_weighting_details
'w=1/[\s^2^(Fo^2^)+(0.0706P)^2^+0.1257P] where P=(Fo^2^+2Fc^2^)/3'
_refine_ls_weighting_scheme       calc
_refine_ls_wR_factor_gt           0.1131
_refine_ls_wR_factor_ref          0.1231
_refine_special_details           ?
_olex2_refinement_description
;
1. Fixed Uiso
 At 1.2 times of:
  All C(H) groups, All C(H,H) groups
 At 1.5 times of:
  All C(H,H,H) groups, All O(H) groups
2.a Ternary CH refined with riding coordinates:
 C6(H6), C12(H12)
2.b Secondary CH2 refined with riding coordinates:
 C7(H7A,H7B), C8(H8A,H8B), C9(H9A,H9B), C10(H10A,H10B), C11(H11A,H11B),
 C14(H14A,H14B)
2.c Aromatic/amide H refined with riding coordinates:
 C18(H18), C19(H19), C20(H20)
2.d Idealised Me refined as rotating group:
 C23(H23A,H23B,H23C), C27(H27A,H27B,H27C), C28(H28A,H28B,H28C)
2.e Idealised tetrahedral OH refined as rotating group:
 O25(H25)
;
_atom_sites_solution_hydrogens    geom
_atom_sites_solution_primary      direct
_atom_sites_solution_secondary    ?
loop_
  _atom_site_label
  _atom_site_type_symbol
  _atom_site_fract_x
  _atom_site_fract_y
  _atom_site_fract_z
  _atom_site_U_iso_or_equiv
  _atom_site_adp_type
  _atom_site_occupancy
  _atom_site_site_symmetry_order
  _atom_site_calc_flag
  _atom_site_refinement_flags_posn
  _atom_site_refinement_flags_adp
  _atom_site_refinement_flags_occupancy
  _atom_site_disorder_assembly
  _atom_site_disorder_group
 O24 O 0.51049(12) 0.49956(10) 0.12399(8) 0.0442(2) Uani 1 1 d . . . . .
 O25 O 0.39677(16) 0.68266(13) 0.10590(10) 0.0575(3) Uani 1 1 d . . . . .
 H25 H 0.4338 0.6242 0.1144 0.086 Uiso 1 1 calc GR . . . .
 O29 O 0.38955(16) 0.86629(12) 0.22384(13) 0.0624(3) Uani 1 1 d . . . . .
 N1 N 0.98196(14) 0.55337(12) 0.21690(10) 0.0408(3) Uani 1 1 d . . . . .
 N2 N 1.14232(15) 0.58162(14) 0.25518(12) 0.0508(3) Uani 1 1 d . . . . .
 N3 N 1.16306(16) 0.48876(15) 0.30207(13) 0.0536(3) Uani 1 1 d . . . . .
 N4 N 1.01890(15) 0.39993(13) 0.29642(11) 0.0468(3) Uani 1 1 d . . . . .
 N13 N 0.68007(13) 0.47692(11) 0.28923(9) 0.0359(2) Uani 1 1 d . . . . .
 C5 C 0.90728(16) 0.44134(13) 0.24323(11) 0.0368(3) Uani 1 1 d . . . . .
 C6 C 0.91880(17) 0.64615(14) 0.16447(13) 0.0426(3) Uani 1 1 d . . . . .
 H6 H 0.8002 0.6042 0.1348 0.051 Uiso 1 1 calc R . . . .
 C7 C 0.9731(2) 0.78237(17) 0.26577(16) 0.0576(4) Uani 1 1 d . . . . .
 H7A H 1.0906 0.8243 0.2992 0.069 Uiso 1 1 calc R . . . .
 H7B H 0.9347 0.7669 0.3325 0.069 Uiso 1 1 calc R . . . .
 C8 C 0.9066(3) 0.87823(19) 0.2140(2) 0.0685(5) Uani 1 1 d . . . . .
 H8A H 0.7894 0.8403 0.1885 0.082 Uiso 1 1 calc R . . . .
 H8B H 0.9472 0.9663 0.2782 0.082 Uiso 1 1 calc R . . . .
 C9 C 0.9556(3) 0.89830(18) 0.1041(2) 0.0651(5) Uani 1 1 d . . . . .
 H9A H 0.9061 0.9551 0.0700 0.078 Uiso 1 1 calc R . . . .
 H9B H 1.0722 0.9455 0.1314 0.078 Uiso 1 1 calc R . . . .
 C10 C 0.9035(2) 0.76239(18) 0.00470(16) 0.0569(4) Uani 1 1 d . . . . .
 H10A H 0.9416 0.7781 -0.0621 0.068 Uiso 1 1 calc R . . . .
 H10B H 0.7861 0.7200 -0.0289 0.068 Uiso 1 1 calc R . . . .
 C11 C 0.97006(19) 0.66518(16) 0.05500(14) 0.0475(3) Uani 1 1 d . . . . .
 H11A H 0.9291 0.5772 -0.0095 0.057 Uiso 1 1 calc R . . . .
 H11B H 1.0874 0.7027 0.0809 0.057 Uiso 1 1 calc R . . . .
 C12 C 0.72694(15) 0.37857(12) 0.21441(10) 0.0344(3) Uani 1 1 d . . . . .
 H12 H 0.6776 0.3725 0.1284 0.041 Uiso 1 1 calc R . . . .
 C14 C 0.75200(19) 0.54023(15) 0.42397(11) 0.0448(3) Uani 1 1 d . . . . .
 H14A H 0.8694 0.5755 0.4515 0.054 Uiso 1 1 calc R . . . .
 H14B H 0.7144 0.4757 0.4654 0.054 Uiso 1 1 calc R . . . .
 C15 C 0.69224(17) 0.65396(14) 0.44666(12) 0.0416(3) Uani 1 1 d . . . . .
 C16 C 0.59384(15) 0.65253(13) 0.33506(11) 0.0356(3) Uani 1 1 d . . . . .
 C17 C 0.58502(15) 0.53613(13) 0.23636(11) 0.0345(3) Uani 1 1 d . . . . .
 C18 C 0.7249(2) 0.75191(17) 0.55782(13) 0.0546(4) Uani 1 1 d . . . . .
 H18 H 0.7879 0.7511 0.6326 0.066 Uiso 1 1 calc R . . . .
 C19 C 0.6603(2) 0.85112(18) 0.55351(15) 0.0606(4) Uani 1 1 d . . . . .
 H19 H 0.6798 0.9180 0.6267 0.073 Uiso 1 1 calc R . . . .
 C20 C 0.5670(2) 0.85219(16) 0.44191(15) 0.0536(4) Uani 1 1 d . . . . .
 H20 H 0.5275 0.9214 0.4421 0.064 Uiso 1 1 calc R . . . .
 C21 C 0.53045(16) 0.75396(13) 0.33005(12) 0.0400(3) Uani 1 1 d . . . . .
 C22 C 0.65778(17) 0.22996(13) 0.21758(13) 0.0413(3) Uani 1 1 d . . . . .
 C23 C 0.7035(2) 0.13831(15) 0.12535(16) 0.0545(4) Uani 1 1 d . . . . .
 H23A H 0.6745 0.1531 0.0470 0.082 Uiso 1 1 calc GR . . . .
 H23B H 0.6465 0.0439 0.1149 0.082 Uiso 1 1 calc GR . . . .
 H23C H 0.8181 0.1607 0.1565 0.082 Uiso 1 1 calc GR . . . .
 C25 C 0.43255(18) 0.77112(15) 0.21537(14) 0.0455(3) Uani 1 1 d . . . . .
 C27 C 0.4730(2) 0.18329(16) 0.17174(17) 0.0557(4) Uani 1 1 d . . . . .
 H27A H 0.4424 0.2405 0.2278 0.084 Uiso 1 1 calc GR . . . .
 H27B H 0.4248 0.0898 0.1680 0.084 Uiso 1 1 calc GR . . . .
 H27C H 0.4359 0.1903 0.0907 0.084 Uiso 1 1 calc GR . . . .
 C28 C 0.7176(2) 0.21576(17) 0.34562(16) 0.0573(4) Uani 1 1 d . . . . .
 H28A H 0.8338 0.2493 0.3757 0.086 Uiso 1 1 calc GR . . . .
 H28B H 0.6739 0.1210 0.3394 0.086 Uiso 1 1 calc GR . . . .
 H28C H 0.6827 0.2681 0.4020 0.086 Uiso 1 1 calc GR . . . .

loop_
  _atom_site_aniso_label
  _atom_site_aniso_U_11
  _atom_site_aniso_U_22
  _atom_site_aniso_U_33
  _atom_site_aniso_U_23
  _atom_site_aniso_U_13
  _atom_site_aniso_U_12
 O24 0.0512(6) 0.0491(5) 0.0309(4) 0.0110(4) 0.0057(4) 0.0261(4)
 O25 0.0712(7) 0.0697(7) 0.0477(6) 0.0267(5) 0.0168(5) 0.0461(6)
 O29 0.0671(7) 0.0482(6) 0.0832(8) 0.0305(6) 0.0223(6) 0.0337(6)
 N1 0.0392(6) 0.0428(6) 0.0436(6) 0.0201(5) 0.0124(5) 0.0173(5)
 N2 0.0405(6) 0.0594(7) 0.0555(7) 0.0286(6) 0.0131(5) 0.0191(6)
 N3 0.0448(7) 0.0677(8) 0.0542(7) 0.0319(6) 0.0120(5) 0.0252(6)
 N4 0.0450(6) 0.0542(7) 0.0470(6) 0.0260(5) 0.0114(5) 0.0236(5)
 N13 0.0437(6) 0.0361(5) 0.0285(5) 0.0102(4) 0.0088(4) 0.0196(4)
 C5 0.0441(7) 0.0367(6) 0.0311(5) 0.0127(5) 0.0108(5) 0.0184(5)
 C6 0.0419(7) 0.0408(7) 0.0528(7) 0.0244(6) 0.0172(6) 0.0190(5)
 C7 0.0753(11) 0.0464(8) 0.0596(9) 0.0216(7) 0.0319(8) 0.0249(8)
 C8 0.0905(14) 0.0500(9) 0.0889(13) 0.0311(9) 0.0486(11) 0.0382(9)
 C9 0.0751(12) 0.0524(9) 0.0923(13) 0.0442(9) 0.0415(10) 0.0319(8)
 C10 0.0611(9) 0.0645(10) 0.0658(9) 0.0411(8) 0.0255(8) 0.0346(8)
 C11 0.0523(8) 0.0531(8) 0.0501(7) 0.0270(6) 0.0198(6) 0.0286(7)
 C12 0.0417(6) 0.0330(6) 0.0300(5) 0.0112(4) 0.0101(5) 0.0177(5)
 C14 0.0580(8) 0.0493(7) 0.0291(6) 0.0119(5) 0.0094(5) 0.0287(7)
 C15 0.0490(7) 0.0431(7) 0.0344(6) 0.0118(5) 0.0140(5) 0.0211(6)
 C16 0.0377(6) 0.0351(6) 0.0354(6) 0.0117(5) 0.0142(5) 0.0146(5)
 C17 0.0370(6) 0.0347(6) 0.0337(6) 0.0136(5) 0.0117(5) 0.0152(5)
 C18 0.0694(10) 0.0568(9) 0.0353(6) 0.0080(6) 0.0144(7) 0.0294(8)
 C19 0.0801(12) 0.0534(9) 0.0462(8) 0.0022(6) 0.0237(8) 0.0318(8)
 C20 0.0659(10) 0.0467(8) 0.0575(8) 0.0133(7) 0.0273(7) 0.0318(7)
 C21 0.0406(7) 0.0378(6) 0.0472(7) 0.0163(5) 0.0191(6) 0.0178(5)
 C22 0.0472(7) 0.0329(6) 0.0446(7) 0.0150(5) 0.0130(6) 0.0171(5)
 C23 0.0652(10) 0.0371(7) 0.0596(9) 0.0100(6) 0.0179(7) 0.0249(7)
 C25 0.0440(7) 0.0437(7) 0.0592(8) 0.0264(6) 0.0207(6) 0.0215(6)
 C27 0.0491(8) 0.0419(7) 0.0740(10) 0.0221(7) 0.0180(7) 0.0155(6)
 C28 0.0708(11) 0.0490(8) 0.0564(9) 0.0304(7) 0.0192(8) 0.0216(8)

_geom_special_details
;
 All esds (except the esd in the dihedral angle between two l.s. planes)
 are estimated using the full covariance matrix.  The cell esds are taken
 into account individually in the estimation of esds in distances, angles
 and torsion angles; correlations between esds in cell parameters are only
 used when they are defined by crystal symmetry.  An approximate (isotropic)
 treatment of cell esds is used for estimating esds involving l.s. planes.
;
loop_
  _geom_bond_atom_site_label_1
  _geom_bond_atom_site_label_2
  _geom_bond_distance
  _geom_bond_site_symmetry_2
  _geom_bond_publ_flag
 O24 C17 1.2356(15) . ?
 O25 H25 0.8200 . ?
 O25 C25 1.3171(19) . ?
 O29 C25 1.2078(18) . ?
 N1 N2 1.3476(17) . ?
 N1 C5 1.3470(18) . ?
 N1 C6 1.4810(16) . ?
 N2 N3 1.2933(18) . ?
 N3 N4 1.3597(19) . ?
 N4 C5 1.3203(17) . ?
 N13 C12 1.4704(15) . ?
 N13 C14 1.4631(15) . ?
 N13 C17 1.3499(15) . ?
 C5 C12 1.5074(18) . ?
 C6 H6 0.9800 . ?
 C6 C7 1.521(2) . ?
 C6 C11 1.520(2) . ?
 C7 H7A 0.9700 . ?
 C7 H7B 0.9700 . ?
 C7 C8 1.523(2) . ?
 C8 H8A 0.9700 . ?
 C8 H8B 0.9700 . ?
 C8 C9 1.517(3) . ?
 C9 H9A 0.9700 . ?
 C9 H9B 0.9700 . ?
 C9 C10 1.512(3) . ?
 C10 H10A 0.9700 . ?
 C10 H10B 0.9700 . ?
 C10 C11 1.5283(19) . ?
 C11 H11A 0.9700 . ?
 C11 H11B 0.9700 . ?
 C12 H12 0.9800 . ?
 C12 C22 1.5544(17) . ?
 C14 H14A 0.9700 . ?
 C14 H14B 0.9700 . ?
 C14 C15 1.4977(18) . ?
 C15 C16 1.3927(18) . ?
 C15 C18 1.3859(19) . ?
 C16 C17 1.4795(16) . ?
 C16 C21 1.4013(17) . ?
 C18 H18 0.9300 . ?
 C18 C19 1.386(2) . ?
 C19 H19 0.9300 . ?
 C19 C20 1.385(3) . ?
 C20 H20 0.9300 . ?
 C20 C21 1.385(2) . ?
 C21 C25 1.5111(19) . ?
 C22 C23 1.5362(19) . ?
 C22 C27 1.532(2) . ?
 C22 C28 1.533(2) . ?
 C23 H23A 0.9600 . ?
 C23 H23B 0.9600 . ?
 C23 H23C 0.9600 . ?
 C27 H27A 0.9600 . ?
 C27 H27B 0.9600 . ?
 C27 H27C 0.9600 . ?
 C28 H28A 0.9600 . ?
 C28 H28B 0.9600 . ?
 C28 H28C 0.9600 . ?

loop_
  _geom_angle_atom_site_label_1
  _geom_angle_atom_site_label_2
  _geom_angle_atom_site_label_3
  _geom_angle
  _geom_angle_site_symmetry_1
  _geom_angle_site_symmetry_3
  _geom_angle_publ_flag
 C25 O25 H25 109.5 . . ?
 N2 N1 C6 120.05(11) . . ?
 C5 N1 N2 108.46(11) . . ?
 C5 N1 C6 131.35(12) . . ?
 N3 N2 N1 106.64(12) . . ?
 N2 N3 N4 110.60(12) . . ?
 C5 N4 N3 106.32(12) . . ?
 C14 N13 C12 125.02(10) . . ?
 C17 N13 C12 121.49(10) . . ?
 C17 N13 C14 112.52(10) . . ?
 N1 C5 C12 123.98(11) . . ?
 N4 C5 N1 107.98(12) . . ?
 N4 C5 C12 128.05(12) . . ?
 N1 C6 H6 108.0 . . ?
 N1 C6 C7 109.52(12) . . ?
 N1 C6 C11 111.53(11) . . ?
 C7 C6 H6 108.0 . . ?
 C11 C6 H6 108.0 . . ?
 C11 C6 C7 111.76(12) . . ?
 C6 C7 H7A 109.6 . . ?
 C6 C7 H7B 109.6 . . ?
 C6 C7 C8 110.23(15) . . ?
 H7A C7 H7B 108.1 . . ?
 C8 C7 H7A 109.6 . . ?
 C8 C7 H7B 109.6 . . ?
 C7 C8 H8A 109.4 . . ?
 C7 C8 H8B 109.4 . . ?
 H8A C8 H8B 108.0 . . ?
 C9 C8 C7 111.31(15) . . ?
 C9 C8 H8A 109.4 . . ?
 C9 C8 H8B 109.4 . . ?
 C8 C9 H9A 109.4 . . ?
 C8 C9 H9B 109.4 . . ?
 H9A C9 H9B 108.0 . . ?
 C10 C9 C8 111.14(14) . . ?
 C10 C9 H9A 109.4 . . ?
 C10 C9 H9B 109.4 . . ?
 C9 C10 H10A 109.3 . . ?
 C9 C10 H10B 109.3 . . ?
 C9 C10 C11 111.78(14) . . ?
 H10A C10 H10B 107.9 . . ?
 C11 C10 H10A 109.3 . . ?
 C11 C10 H10B 109.3 . . ?
 C6 C11 C10 109.70(12) . . ?
 C6 C11 H11A 109.7 . . ?
 C6 C11 H11B 109.7 . . ?
 C10 C11 H11A 109.7 . . ?
 C10 C11 H11B 109.7 . . ?
 H11A C11 H11B 108.2 . . ?
 N13 C12 C5 108.50(10) . . ?
 N13 C12 H12 105.4 . . ?
 N13 C12 C22 114.71(11) . . ?
 C5 C12 H12 105.4 . . ?
 C5 C12 C22 116.28(10) . . ?
 C22 C12 H12 105.4 . . ?
 N13 C14 H14A 111.3 . . ?
 N13 C14 H14B 111.3 . . ?
 N13 C14 C15 102.32(10) . . ?
 H14A C14 H14B 109.2 . . ?
 C15 C14 H14A 111.3 . . ?
 C15 C14 H14B 111.3 . . ?
 C16 C15 C14 110.01(11) . . ?
 C18 C15 C14 128.69(13) . . ?
 C18 C15 C16 121.29(13) . . ?
 C15 C16 C17 107.08(11) . . ?
 C15 C16 C21 121.28(12) . . ?
 C21 C16 C17 131.54(12) . . ?
 O24 C17 N13 124.27(11) . . ?
 O24 C17 C16 127.70(11) . . ?
 N13 C17 C16 107.98(10) . . ?
 C15 C18 H18 121.2 . . ?
 C15 C18 C19 117.56(14) . . ?
 C19 C18 H18 121.2 . . ?
 C18 C19 H19 119.5 . . ?
 C20 C19 C18 121.00(14) . . ?
 C20 C19 H19 119.5 . . ?
 C19 C20 H20 118.8 . . ?
 C21 C20 C19 122.40(14) . . ?
 C21 C20 H20 118.8 . . ?
 C16 C21 C25 127.04(12) . . ?
 C20 C21 C16 116.40(13) . . ?
 C20 C21 C25 116.51(12) . . ?
 C23 C22 C12 108.01(12) . . ?
 C27 C22 C12 106.65(11) . . ?
 C27 C22 C23 108.41(12) . . ?
 C27 C22 C28 109.83(13) . . ?
 C28 C22 C12 114.35(11) . . ?
 C28 C22 C23 109.41(12) . . ?
 C22 C23 H23A 109.5 . . ?
 C22 C23 H23B 109.5 . . ?
 C22 C23 H23C 109.5 . . ?
 H23A C23 H23B 109.5 . . ?
 H23A C23 H23C 109.5 . . ?
 H23B C23 H23C 109.5 . . ?
 O25 C25 C21 119.43(12) . . ?
 O29 C25 O25 120.26(14) . . ?
 O29 C25 C21 120.30(14) . . ?
 C22 C27 H27A 109.5 . . ?
 C22 C27 H27B 109.5 . . ?
 C22 C27 H27C 109.5 . . ?
 H27A C27 H27B 109.5 . . ?
 H27A C27 H27C 109.5 . . ?
 H27B C27 H27C 109.5 . . ?
 C22 C28 H28A 109.5 . . ?
 C22 C28 H28B 109.5 . . ?
 C22 C28 H28C 109.5 . . ?
 H28A C28 H28B 109.5 . . ?
 H28A C28 H28C 109.5 . . ?
 H28B C28 H28C 109.5 . . ?

loop_
  _geom_torsion_atom_site_label_1
  _geom_torsion_atom_site_label_2
  _geom_torsion_atom_site_label_3
  _geom_torsion_atom_site_label_4
  _geom_torsion
  _geom_torsion_site_symmetry_1
  _geom_torsion_site_symmetry_2
  _geom_torsion_site_symmetry_3
  _geom_torsion_site_symmetry_4
  _geom_torsion_publ_flag
 N1 N2 N3 N4 -0.52(17) . . . . ?
 N1 C5 C12 N13 -65.23(14) . . . . ?
 N1 C5 C12 C22 163.71(12) . . . . ?
 N1 C6 C7 C8 -178.97(13) . . . . ?
 N1 C6 C11 C10 -179.52(12) . . . . ?
 N2 N1 C5 N4 -0.32(15) . . . . ?
 N2 N1 C5 C12 179.83(11) . . . . ?
 N2 N1 C6 C7 -68.12(17) . . . . ?
 N2 N1 C6 C11 56.12(17) . . . . ?
 N2 N3 N4 C5 0.32(17) . . . . ?
 N3 N4 C5 N1 0.01(15) . . . . ?
 N3 N4 C5 C12 179.85(12) . . . . ?
 N4 C5 C12 N13 114.96(14) . . . . ?
 N4 C5 C12 C22 -16.10(18) . . . . ?
 N13 C12 C22 C23 174.42(11) . . . . ?
 N13 C12 C22 C27 58.07(14) . . . . ?
 N13 C12 C22 C28 -63.53(16) . . . . ?
 N13 C14 C15 C16 0.96(16) . . . . ?
 N13 C14 C15 C18 -178.16(16) . . . . ?
 C5 N1 N2 N3 0.52(16) . . . . ?
 C5 N1 C6 C7 107.01(16) . . . . ?
 C5 N1 C6 C11 -128.75(15) . . . . ?
 C5 C12 C22 C23 -57.50(14) . . . . ?
 C5 C12 C22 C27 -173.84(11) . . . . ?
 C5 C12 C22 C28 64.56(16) . . . . ?
 C6 N1 N2 N3 176.66(12) . . . . ?
 C6 N1 C5 N4 -175.88(13) . . . . ?
 C6 N1 C5 C12 4.3(2) . . . . ?
 C6 C7 C8 C9 -55.8(2) . . . . ?
 C7 C6 C11 C10 -56.55(17) . . . . ?
 C7 C8 C9 C10 55.6(2) . . . . ?
 C8 C9 C10 C11 -55.8(2) . . . . ?
 C9 C10 C11 C6 55.81(19) . . . . ?
 C11 C6 C7 C8 56.93(18) . . . . ?
 C12 N13 C14 C15 166.27(12) . . . . ?
 C12 N13 C17 O24 11.4(2) . . . . ?
 C12 N13 C17 C16 -166.17(11) . . . . ?
 C14 N13 C12 C5 -54.13(16) . . . . ?
 C14 N13 C12 C22 77.78(16) . . . . ?
 C14 N13 C17 O24 -179.41(13) . . . . ?
 C14 N13 C17 C16 3.07(15) . . . . ?
 C14 C15 C16 C17 0.73(16) . . . . ?
 C14 C15 C16 C21 -176.05(13) . . . . ?
 C14 C15 C18 C19 177.03(16) . . . . ?
 C15 C16 C17 O24 -179.73(14) . . . . ?
 C15 C16 C17 N13 -2.32(15) . . . . ?
 C15 C16 C21 C20 -1.9(2) . . . . ?
 C15 C16 C21 C25 175.33(13) . . . . ?
 C15 C18 C19 C20 -0.2(3) . . . . ?
 C16 C15 C18 C19 -2.0(3) . . . . ?
 C16 C21 C25 O25 1.4(2) . . . . ?
 C16 C21 C25 O29 -177.53(14) . . . . ?
 C17 N13 C12 C5 113.72(12) . . . . ?
 C17 N13 C12 C22 -114.38(13) . . . . ?
 C17 N13 C14 C15 -2.52(16) . . . . ?
 C17 C16 C21 C20 -177.79(14) . . . . ?
 C17 C16 C21 C25 -0.6(2) . . . . ?
 C18 C15 C16 C17 179.92(14) . . . . ?
 C18 C15 C16 C21 3.1(2) . . . . ?
 C18 C19 C20 C21 1.4(3) . . . . ?
 C19 C20 C21 C16 -0.3(2) . . . . ?
 C19 C20 C21 C25 -177.86(16) . . . . ?
 C20 C21 C25 O25 178.58(14) . . . . ?
 C20 C21 C25 O29 -0.3(2) . . . . ?
 C21 C16 C17 O24 -3.4(2) . . . . ?
 C21 C16 C17 N13 174.00(13) . . . . ?

_shelx_SHELXL_version_number      '2014/7'
loop_
  _refln_index_h
  _refln_index_k
  _refln_index_l
  _refln_F_squared_meas
  _refln_F_squared_sigma
  _refln_scale_group_code
 0 0 -1 8736.95 180.488 4
 0 0 1 8448.68 241.845 26
 0 0 -1 8950.01 198.258 28
 0 0 1 8549.86 210.866 29
 0 0 -1 8776 184.687 3
 0 0 -1 9260.87 180.742 25
 0 0 2 343831 1807.03 29
 0 0 -2 338436 1747.2 28
 0 0 -2 342428 1623.08 4
 0 0 2 337146 2068.26 26
 0 0 -2 342308 1634.47 3
 0 0 3 29321.4 647.948 29
 0 0 -3 28816.7 589.078 3
 0 0 -3 28332.5 555.363 25
 0 0 3 30702.9 757.061 26
 0 0 3 30946.9 432.21 30
 0 0 -3 28987.1 582.515 4
 0 0 -3 29922.5 638.661 28
 0 0 -4 20103.9 545.754 25
 0 0 -4 19584 565.544 3
 0 0 -4 20647.1 628.7 28
 0 0 4 20075.9 607.874 29
 0 0 4 21233 727.3 26
 0 0 4 20482.8 404.768 30
 0 0 -5 763.163 135.246 3
 0 0 5 858.685 222.546 26
 0 0 5 784.238 150.399 29
 0 0 -5 912.181 185.317 28
 0 0 5 761.753 166.916 2
 0 0 -5 851.74 150.341 25
 0 0 -6 18487.1 770.524 28
 0 0 6 19033.7 815.292 26
 0 0 6 17721.2 768.882 2
 0 0 -6 18135.3 691.444 3
 0 0 -6 19094.8 690.607 25
 0 0 6 18922.3 745.313 29
 0 0 7 2521.61 322.835 2
 0 0 7 1981.62 307.476 26
 0 0 -7 2793.07 304.537 3
 0 0 -7 2607.2 321.562 28
 0 0 -7 2830.84 291.3 25
 0 0 8 1116.38 243.314 26
 0 0 -8 978.8 190.794 3
 0 0 8 731.993 186.559 5
 0 0 -8 886.682 227.125 28
 0 0 8 535.052 185.749 2
 0 0 9 28820.6 601.566 37
 0 0 9 30337.3 617.899 23
 0 0 -9 30013.9 605.681 39
 0 0 9 30066.5 617.257 38
 0 0 9 29378.9 623.415 18
 0 0 9 31353 1299.13 26
 0 0 -9 29734 615.286 35
 0 0 9 30566.5 1305.92 2
 0 0 9 28893.6 610.898 24
 0 0 -9 31171.1 1295.51 28
 0 0 10 461.605 91.5849 38
 0 0 10 487.179 96.3467 37
 0 0 10 552.657 96.9314 23
 0 0 10 533.224 102.462 24
 0 0 -10 440.342 90.3848 39
 0 0 -10 489.847 97.5758 35
 0 0 -11 406.192 86.6852 39
 0 0 11 420.68 88.1861 24
 0 0 11 474.243 85.4701 37
 0 0 -11 422.73 89.2756 35
 0 0 11 425.825 91.1026 38
 0 0 11 344.911 80.9894 23
 0 0 -11 521.991 90.6703 12
 0 0 -12 793.258 97.2725 12
 0 0 12 757.227 89.9203 23
 0 0 12 864.659 102.616 24
 0 0 12 863.723 101.73 38
 0 0 -12 832.914 92.7892 39
 0 0 -12 905.109 100.051 35
 0 0 12 697.075 86.8184 37
 0 0 -13 -43.2216 23.6792 39
 0 0 13 37.1774 38.2241 38
 0 0 -13 4.8956 31.1096 12
 0 0 13 9.79357 20.4701 17
 0 0 13 0.91888 34.1615 24
 0 0 13 17.5204 22.1347 37
 0 0 -13 -20.113 31.7634 35
 0 -1 13 918.904 91.8064 24
 0 1 -13 1132.3 97.7201 35
 0 -1 13 1138.55 96.9099 37
 0 1 -13 1058.75 90.405 12
 0 1 -13 946.466 86.6632 39
 0 -1 13 903.603 88.0844 38
 0 -1 12 4.22836 52.8322 37
 0 -1 12 87.8885 52.6304 38
 0 -1 12 19.952 35.7719 23
 0 -1 12 99.9989 54.7141 24
 0 1 -12 7.433 48.9145 35
 0 1 -12 -6.89257 39.1618 39
 0 1 -12 33.0212 48.0233 12
 0 -1 11 3215.62 209.661 24
 0 -1 11 3298.37 207.439 38
 0 -1 11 3478.97 211.668 37
 0 1 -11 3335.13 210.846 35
 0 1 -11 3190.52 202.916 12
 0 1 -11 3317.96 209.818 39
 0 -1 11 3578.36 208.404 23
 0 1 -10 699.809 107.606 35
 0 1 -10 649.058 101.82 39
 0 1 -10 679.949 101.678 12
 0 -1 10 646.245 106.1 37
 0 -1 10 544.309 98.9672 24
 0 -1 10 544.507 98.5794 38
 0 -1 10 590.673 95.3483 23
 0 1 -9 265.865 71.4258 35
 0 -1 9 65.5214 138.923 2
 0 -1 9 1.7043 37.051 23
 0 -1 9 235.465 70.8893 38
 0 1 -9 305.433 132.285 28
 0 1 -9 207.517 65.7796 39
 0 -1 9 288.527 74.1541 24
 0 -1 9 203.145 107.207 26
 0 -1 9 192.364 63.2534 37
 0 1 -9 388.878 158.598 3
 0 -1 8 459.458 170.467 29
 0 -1 8 709.379 233.068 2
 0 -1 8 870.83 216.29 26
 0 1 -8 972.047 205.285 28
 0 1 -8 777.396 178.934 3
 0 -1 7 1792.96 320.861 26
 0 -1 7 1824.14 274.453 29
 0 1 -7 1805.76 260.597 3
 0 -1 7 1724.59 283.184 2
 0 1 -7 1991.25 272.039 28
 0 1 -6 5042.33 387.383 28
 0 -1 6 5259.18 415.583 29
 0 -1 6 5428.47 487 26
 0 1 -6 5423.75 398.108 3
 0 1 -6 5569.75 322.739 25
 0 1 -5 920.084 156.313 28
 0 -1 5 1049.29 180.371 29
 0 1 -5 1166.29 174.871 3
 0 -1 5 980.634 256.426 26
 0 1 -5 1048.76 124.24 25
 0 1 -5 989.149 166.347 4
 0 1 -4 43209.6 856.631 4
 0 1 -4 42751.1 835.475 28
 0 -1 4 43265.4 961.196 29
 0 1 -4 41909.5 640.013 25
 0 1 -4 43058.1 866.107 3
 0 -1 4 40375.4 1104.82 26
 0 1 -3 7497.6 296.427 28
 0 1 -3 7043.75 314.117 3
 0 1 -3 7113.77 305.487 4
 0 -1 3 6379.92 398.034 26
 0 -1 3 6367.19 346.587 29
 0 1 -3 7268.9 210.344 25
 0 -1 2 37243.9 637.988 29
 0 1 -2 40851.4 327.338 25
 0 -1 2 39223.4 677.47 26
 0 1 -2 40505.6 518.202 28
 0 -1 2 39748.4 462.136 27
 0 1 -2 39946.3 604.496 3
 0 1 -2 38152.8 590.356 4
 0 -1 1 35860.3 443.727 26
 0 -1 1 35709.6 431.717 29
 0 -1 1 34876 340.893 27
 0 1 -1 35837.1 445.288 4
 0 1 -1 35955.7 438.653 3
 0 1 -1 36293.9 289.863 28
 0 1 0 245562 735.771 1
 0 -1 0 244934 1026.62 25
 0 1 1 58280 628.673 5
 0 -1 -1 59336.1 424.368 3
 0 -1 -1 61015.9 690.202 25
 0 -1 -1 58909 624.45 28
 0 1 1 60065.6 432.81 1
 0 1 1 61959.6 427.737 30
 0 1 1 58019.9 686.77 2
 0 1 1 58793.4 680.057 26
 0 1 2 142211 1294.78 2
 0 -1 -2 141213 1286.5 25
 0 1 2 139842 1299.89 26
 0 -1 -2 140691 1260.67 28
 0 1 2 140655 628.362 30
 0 -1 -2 143624 964.235 3
 0 -1 -3 12262.4 446.328 28
 0 1 3 11085.4 181.347 30
 0 -1 -3 11995.6 355.917 3
 0 1 3 12418.4 460.944 2
 0 -1 -3 11968.4 437.208 25
 0 1 4 2083.03 249.914 26
 0 -1 -4 2416.88 192.186 3
 0 1 4 2056.01 237.316 2
 0 -1 -4 2228.93 238.118 28
 0 -1 -4 2156.53 218.269 25
 0 1 5 27358.3 901.561 26
 0 -1 -5 28401.4 748.163 3
 0 -1 -5 27827.8 829.534 25
 0 1 5 26233.6 892.973 2
 0 -1 -5 26796.9 870.873 28
 0 -1 -6 4204.56 389.766 28
 0 -1 -6 4618.89 345.148 3
 0 1 6 4583.03 338.571 1
 0 1 6 4017.95 403.822 26
 0 -1 -6 4692.69 382.336 25
 0 1 6 4276.03 411.827 2
 0 1 6 4074.38 357.728 5
 0 1 7 7385.61 523.608 5
 0 -1 -7 6868.46 507.821 25
 0 1 7 6292.04 531.422 2
 0 1 7 6093.38 524.753 26
 0 -1 -7 6477.79 531.371 28
 0 1 8 1491.7 134.797 37
 0 1 8 1348 136.255 23
 0 1 8 1863.17 307.431 2
 0 1 8 1525.37 140.562 24
 0 -1 -8 1413.05 130.459 39
 0 1 8 1392.38 133.424 38
 0 -1 -8 1445.05 271.425 28
 0 1 8 1167.24 275.21 26
 0 -1 -8 1398.36 141.602 35
 0 1 8 1664.45 148.177 18
 0 1 9 253.84 77.463 23
 0 1 9 283.091 76.8249 24
 0 1 9 285.689 82.5917 18
 0 1 9 547.245 180.903 2
 0 1 9 214.723 73.0293 38
 0 -1 -9 331.406 71.2506 39
 0 1 9 234.573 60.6544 37
 0 -1 -9 256.613 81.8299 35
 0 1 10 -59.6394 55.3902 24
 0 -1 -10 -3.7374 52.0698 39
 0 1 10 -13.713 57.9432 23
 0 1 10 -123.602 55.618 37
 0 1 10 10.0725 52.9944 38
 0 -1 -10 5.92545 57.9631 35
 0 1 11 219.235 71.5459 38
 0 1 11 165.804 67.6819 24
 0 -1 -11 154.03 68.7296 12
 0 -1 -11 183.763 69.2738 35
 0 -1 -11 46.004 52.6991 39
 0 1 11 87.8713 50.3664 23
 0 1 11 147.262 55.5289 37
 0 1 12 212.546 54.4826 23
 0 -1 -12 123.81 50.3154 12
 0 1 12 162.761 43.5013 37
 0 -1 -12 147.414 48.5964 35
 0 -1 -12 192.444 44.9102 39
 0 1 12 162.384 58.8979 24
 0 1 12 129.973 52.6483 38
 0 1 13 492.142 54.8155 38
 0 1 13 566.478 56.4867 24
 0 -1 -13 348.19 39.9258 35
 0 -1 -13 496.263 51.8925 12
 0 2 -14 17.4098 20.036 35
 0 -2 14 0.54794 13.6726 38
 0 -2 14 29.8854 25.8966 37
 0 -2 14 42.7645 20.559 17
 0 -2 13 593.123 83.0775 37
 0 2 -13 601.108 72.7701 12
 0 2 -13 556.915 76.1017 39
 0 2 -13 529.629 78.0156 35
 0 -2 13 513.861 71.4921 24
 0 -2 13 432.682 68.0029 38
 0 2 -12 41.7384 67.3178 35
 0 2 -12 -69.9578 47.6485 12
 0 2 -12 18.3647 52.9592 39
 0 -2 12 1.01646 56.5451 38
 0 -2 12 32.1261 61.4719 24
 0 -2 12 -18.3985 58.0291 37
 0 2 -11 10756.6 362.011 12
 0 2 -11 11296.5 383.201 39
 0 -2 11 10769.8 376.082 37
 0 -2 11 10786.8 342.068 23
 0 -2 11 10909.5 367.9 38
 0 -2 11 10499.9 367.192 24
 0 2 -11 10826.7 375.499 35
 0 2 -10 925.7 243.721 3
 0 -2 10 975.429 125.514 24
 0 -2 10 968.96 118.405 38
 0 2 -10 931.797 121.04 35
 0 2 -10 1192.09 247.617 28
 0 -2 10 917.89 119.631 37
 0 -2 10 1023 114.948 23
 0 2 -10 1084.63 130.827 39
 0 2 -10 1170.42 121.256 12
 0 -2 9 -42.7516 100.342 2
 0 -2 9 -8.89677 37.0202 37
 0 -2 9 -227.791 179.708 26
 0 -2 9 79.1192 49.3268 38
 0 -2 9 -438.766 192.487 29
 0 2 -9 412.415 140.17 28
 0 2 -9 40.2074 39.6201 12
 0 2 -9 -77.8601 49.1833 10
 0 2 -9 113.55 58.0549 39
 0 2 -9 -506.702 173.767 3
 0 -2 9 -18.4769 43.7986 24
 0 2 -9 35.2718 53.702 35
 0 -2 8 2559.8 330.497 29
 0 -2 8 2912.07 424.387 26
 0 2 -8 2763.25 342.238 3
 0 2 -8 2661.8 334.668 28
 0 2 -7 18645.4 813.535 4
 0 2 -7 19904.3 848.113 3
 0 2 -7 19304.8 797.773 28
 0 -2 7 20063.2 865.623 29
 0 -2 7 19174.3 1005.45 26
 0 2 -6 24242.6 849.717 3
 0 -2 6 23101.7 1047.08 26
 0 2 -6 22835.4 772.697 28
 0 -2 6 22679 867.43 29
 0 2 -6 23592.3 831.82 4
 0 2 -5 57853 1184.76 3
 0 2 -5 58359 1177.32 4
 0 2 -5 55644.9 1041.52 28
 0 -2 5 53299 1472.06 26
 0 -2 5 54352.2 1288.05 29
 0 2 -5 57321.6 650.277 25
 0 -2 4 1392.72 251.538 26
 0 2 -4 1689.3 193.269 4
 0 2 -4 1481.08 76.4363 25
 0 2 -4 1849.98 200.015 3
 0 2 -4 1620.2 162.042 28
 0 -2 4 1135.63 210.207 29
 0 2 -3 84055.5 1112.41 3
 0 2 -3 78702.7 857.277 28
 0 -2 3 81528.7 1211.83 26
 0 -2 3 80510 1175.92 29
 0 2 -3 85308.7 1124.19 4
 0 -2 3 82155.5 829.636 27
 0 -2 2 17406.2 344.591 27
 0 -2 2 17164.6 447.186 26
 0 2 -2 17371.9 449.038 4
 0 2 -2 16725.1 434.967 3
 0 -2 2 16615.1 434.093 29
 0 2 -2 17547.9 282.562 28
 0 2 -2 16629.7 401.347 6
 0 -2 1 849.054 68.537 25
 0 2 -1 767.366 86.9584 4
 0 2 -1 719.942 79.7886 3
 0 2 -1 648.174 88.9248 2
 0 -2 1 882.55 83.6046 27
 0 -2 1 736.727 92.7563 29
 0 2 -1 825.232 87.7606 6
 0 -2 0 24361.4 459.537 25
 0 -2 0 26029.5 341.528 28
 0 2 0 25365.7 500.729 2
 0 -2 0 26025.6 491.254 27
 0 2 0 25177.5 452.964 6
 0 2 0 25046.7 330.889 1
 0 2 1 1627.75 146.037 5
 0 -2 -1 1890.41 159.275 25
 0 2 1 1985.24 170.919 2
 0 2 1 1742.86 82.3356 1
 0 -2 -1 1771.24 129.837 28
 0 2 2 53807 558.084 1
 0 2 2 54091.8 866.411 5
 0 2 2 55624 968.215 2
 0 -2 -2 56141.8 952.971 25
 0 2 3 89408.9 1390.54 2
 0 -2 -3 87904 1293.88 28
 0 -2 -3 90995.4 1356.17 25
 0 2 3 86231.3 1230.38 5
 0 2 3 92021.1 1388.23 26
 0 2 3 88703.4 897.609 1
 0 2 4 4471.98 239.747 1
 0 2 4 4129.02 346.562 26
 0 -2 -4 4290.8 335.379 28
 0 2 4 4325.52 318.207 5
 0 -2 -4 4538.77 347.244 25
 0 2 4 3690.28 327.016 2
 0 2 5 387.415 159.946 26
 0 2 5 684.027 157.126 5
 0 2 5 116.982 135.572 2
 0 -2 -5 445.054 145.866 28
 0 -2 -5 697.439 166.775 25
 0 2 6 836.093 221.409 2
 0 -2 -6 1092.7 226.839 25
 0 2 6 1274.69 219.144 5
 0 2 6 1364.79 254.521 26
 0 -2 -6 1112.21 218.316 28
 0 2 7 1247.53 236.762 5
 0 -2 -7 1637.54 273.36 25
 0 2 7 1272.51 288.605 2
 0 -2 -7 999.744 240.738 28
 0 -2 -8 2364.46 186.228 35
 0 -2 -8 1883.02 315.949 28
 0 2 8 2140.74 169.416 33
 0 2 8 2510.16 382.628 2
 0 2 8 2169.35 174.892 23
 0 -2 -8 2461.21 345.825 27
 0 -2 -8 2457.99 343.532 25
 0 2 8 2168.12 174.715 18
 0 2 8 2345.09 175.914 38
 0 2 8 1938.65 161.122 24
 0 -2 -8 2194.22 164.359 39
 0 2 8 2274.76 166.219 20
 0 2 9 3849 236.689 18
 0 2 9 3514.96 222.95 23
 0 2 9 4016.02 218.351 37
 0 2 9 3916.41 228.999 38
 0 2 9 3839.57 226.416 24
 0 -2 -9 3883.57 218.387 39
 0 -2 -9 3621.39 226.288 35
 0 2 10 406.256 84.2371 24
 0 -2 -10 405.735 86.6528 35
 0 2 10 401.517 82.364 38
 0 -2 -10 409.982 78.8807 39
 0 2 10 441.979 90.6026 23
 0 2 11 105.635 51.3979 24
 0 2 11 94.7347 38.2256 14
 0 -2 -11 117.662 59.851 12
 0 -2 -11 34.2297 42.5068 35
 0 2 11 69.8042 47.8864 38
 0 -2 -11 135.822 45.0148 39
 0 2 11 159.563 60.758 23
 0 -2 -12 746.733 71.8792 35
 0 2 12 873.151 80.062 24
 0 2 12 835.161 74.9876 21
 0 -2 -12 700.75 57.3954 39
 0 -2 -12 823.46 81.311 12
 0 2 12 897.923 84.872 23
 0 2 12 887.814 81.6448 38
 0 -3 14 787.729 70.0559 17
 0 3 -14 772.439 65.8366 35
 0 -3 14 565.885 47.767 38
 0 -3 14 789.576 70.7115 37
 0 -3 13 4.79598 28.0591 38
 0 -3 13 52.3486 48.0096 37
 0 3 -13 57.4936 32.8782 12
 0 3 -13 42.0497 45.2213 39
 0 3 -13 43.2081 42.7754 35
 0 -3 13 59.6498 36.6111 24
 0 -3 12 -16.1549 48.8715 38
 0 -3 12 18.8118 45.7053 24
 0 3 -12 59.2204 71.8459 35
 0 3 -12 25.7718 63.9364 39
 0 3 -12 106.416 39.504 12
 0 -3 12 78.6483 71.6252 37
 0 3 -11 5044.21 260.196 35
 0 3 -11 5317.86 269.238 39
 0 3 -11 4960.78 244.355 12
 0 3 -11 5370.13 246.761 13
 0 -3 11 4733.03 244.211 24
 0 -3 11 5127.88 264.083 37
 0 -3 11 5314.53 254.708 38
 0 3 -10 1165.61 126.504 12
 0 3 -10 1625.71 303.167 3
 0 -3 10 1271.82 129.6 24
 0 -3 10 1226 129.001 38
 0 3 -10 1099.16 121.32 13
 0 -3 10 1510.57 328.407 2
 0 3 -10 1104.68 129.449 39
 0 3 -10 1236.54 139.33 35
 0 -3 10 979.294 129.226 37
 0 -3 10 1264.75 289.928 26
 0 3 -9 3825.6 209.57 13
 0 3 -9 3779.75 217.129 39
 0 3 -9 3184.79 416.009 3
 0 3 -9 3767.56 401.638 28
 0 3 -9 3692.96 218.119 10
 0 -3 9 3644.9 216.235 37
 0 3 -9 3495.13 197.86 12
 0 3 -9 3722.09 214.514 35
 0 -3 9 3918.88 215.369 38
 0 -3 9 3670.25 501.83 26
 0 -3 9 3669.68 210.326 24
 0 -3 9 3703.91 433.009 29
 0 3 -8 679.257 155.204 28
 0 -3 8 480.865 233.862 26
 0 -3 8 693.151 188.456 29
 0 3 -8 350.269 154.226 4
 0 3 -8 599.914 194.492 3
 0 3 -7 1291.74 201.272 28
 0 3 -7 1557.48 250.892 3
 0 -3 7 1368.67 356.915 26
 0 3 -7 1417.43 233.687 4
 0 -3 7 1315.02 260.708 29
 0 3 -6 814.156 180.655 4
 0 -3 6 741.026 221.732 29
 0 3 -6 933.271 165.503 28
 0 -3 6 1009.08 315.702 26
 0 3 -6 951.971 198.179 3
 0 3 -5 22512.7 778.81 3
 0 -3 5 20722.5 845.673 29
 0 -3 5 22787.9 957.099 26
 0 3 -5 21773.8 610.489 28
 0 3 -5 22405.8 774.906 4
 0 -3 4 12845.4 590.499 26
 0 3 -4 11313.9 364.264 28
 0 -3 4 11701 547.947 29
 0 -3 4 12031.6 373.66 27
 0 3 -4 12284.8 518.741 4
 0 3 -4 11655.1 505.453 3
 0 3 -3 9.2517 78.5186 4
 0 -3 3 15.0408 85.5374 26
 0 3 -3 30.4615 69.4376 6
 0 3 -3 43.1646 34.2277 28
 0 3 -3 33.0216 69.7298 3
 0 -3 3 94.9886 45.6393 27
 0 -3 3 45.6363 88.6542 29
 0 -3 2 57434.7 769.293 27
 0 -3 2 58532.6 548.626 25
 0 3 -2 58604.3 856.244 6
 0 -3 2 59115.3 928.446 29
 0 3 -2 58164.1 914.424 2
 0 3 -2 56252.7 905.805 4
 0 3 -2 56809.8 872.525 3
 0 -3 1 176.197 62.6478 27
 0 3 -1 455.692 89.6514 6
 0 3 -1 485.681 101.77 2
 0 3 -1 97.6992 53.6707 4
 0 -3 1 182.637 51.9882 25
 0 3 -1 227.848 59.7973 3
 0 3 -1 180.114 84.7784 5
 0 3 0 183271 1366.87 4
 0 -3 0 185959 1107.61 28
 0 3 0 192411 1061.64 3
 0 -3 0 180575 1546.36 25
 0 3 0 180191 1643.42 5
 0 3 0 187025 1534.2 6
 0 3 0 186639 1689.93 2
 0 -3 0 187415 1636.46 27
 0 -3 -1 22541.2 508.804 28
 0 3 1 22398.3 306.847 1
 0 -3 -1 22086.7 617.807 25
 0 3 1 22888.8 621.627 5
 0 3 1 23914.9 663.715 2
 0 3 2 60824.8 1164.92 2
 0 3 2 56600.8 497.536 1
 0 -3 -2 58313.4 1115.23 25
 0 -3 -2 58729.7 989.359 28
 0 3 2 60088.6 1076.08 5
 0 3 3 20701.8 753.859 2
 0 3 3 20579.3 690.334 5
 0 -3 -3 21289.6 684.807 28
 0 -3 -3 19975.1 724.833 25
 0 3 4 66104.9 1355.42 5
 0 3 4 64073.3 1452.35 2
 0 -3 -4 64208.8 1416.29 25
 0 -3 -4 66547 1373.93 28
 0 -3 -5 1417.43 243.556 25
 0 3 5 1317.63 205.259 5
 0 -3 -5 900.121 197.591 28
 0 3 5 1107.74 235.402 2
 0 3 6 8565.83 642.452 2
 0 -3 -6 8500.52 595.97 28
 0 -3 -6 8460.21 613.635 25
 0 3 6 9785.71 620.227 5
 0 -3 -7 3347.88 428.209 25
 0 -3 -7 3444.44 199.229 39
 0 3 7 3497.92 218.503 18
 0 3 7 3218.42 201.354 33
 0 3 7 3355.45 203.393 24
 0 -3 -7 3170.51 395.268 28
 0 -3 -7 3173.98 392.318 27
 0 3 7 2873.25 402.128 2
 0 3 7 3304.54 206.754 23
 0 3 7 3529.87 207.522 38
 0 3 7 3429.45 206.455 20
 0 -3 -7 3096.51 214.599 35
 0 -3 -8 2758.15 185.356 39
 0 3 8 3036.72 197.276 20
 0 3 8 2918.18 193.959 38
 0 3 8 2555.41 184.066 24
 0 -3 -8 2798.77 205.489 35
 0 3 8 2451.7 187.521 23
 0 3 8 2805.69 189.261 33
 0 3 8 2617.31 196.537 18
 0 -3 -9 495.765 85.289 39
 0 3 9 478.512 89.4152 23
 0 3 9 564.365 93.2338 38
 0 3 9 602.893 98.7131 24
 0 -3 -9 485.675 100.46 35
 0 3 9 553.443 107.741 18
 0 3 9 630.335 97.1714 20
 0 3 10 74.2384 48.1724 24
 0 -3 -10 156.485 61.2663 35
 0 3 10 96.3854 53.3397 38
 0 -3 -10 161.486 44.3198 39
 0 3 10 206.357 80.2816 23
 0 3 11 265.008 52.3005 24
 0 -3 -11 229.333 51.443 35
 0 3 11 152.176 45.4158 38
 0 -3 -11 183.107 55.2688 12
 0 3 11 254.012 58.9415 21
 0 3 11 183.492 47.3255 14
 0 3 11 199.951 61.474 23
 0 3 12 634.391 57.6728 23
 0 -3 -12 758.558 62.2225 12
 0 3 12 646.427 52.0769 21
 0 -4 14 75.361 34.5972 17
 0 -4 14 20.2529 30.6147 37
 0 4 -14 2.70376 27.4783 35
 0 -4 13 66.1928 31.2292 38
 0 -4 13 72.1583 27.8368 24
 0 4 -13 83.9219 48.3867 35
 0 -4 13 75.4321 51.9712 37
 0 4 -13 43.7146 48.1121 39
 0 4 -12 57.5042 68.2189 35
 0 -4 12 48.1028 64.975 37
 0 4 -12 38.9681 55.1362 39
 0 -4 12 -4.47719 30.3488 38
 0 4 -12 4.04266 37.314 13
 0 4 -12 74.1194 36.0417 12
 0 -4 12 -13.0207 35.1887 24
 0 4 -11 404.748 90.641 35
 0 4 -11 405.199 86.6522 39
 0 4 -11 435.468 82.1688 13
 0 4 -11 441.007 73.6008 12
 0 -4 11 441.676 81.3955 38
 0 -4 11 468.52 80.7342 24
 0 -4 11 431.865 91.082 37
 0 4 -10 3053.45 189.702 12
 0 4 -10 3226.59 211.372 35
 0 4 -10 3193.78 202.327 13
 0 4 -10 3112.57 207.243 39
 0 -4 10 3139.25 193.755 38
 0 -4 10 2828.04 200.215 37
 0 -4 10 2910.45 187.184 24
 0 -4 9 570.899 91.9268 37
 0 4 -9 649.088 93.7761 13
 0 -4 9 385.983 275.373 26
 0 4 -9 664.723 94.2387 39
 0 -4 9 964.794 222.9 29
 0 4 -9 634.056 90.4019 10
 0 4 -9 677.117 199.346 3
 0 4 -9 620.998 98.514 35
 0 -4 8 2661.14 495.295 26
 0 4 -8 2926.24 370.693 3
 0 4 -8 2589.76 366.751 4
 0 -4 8 2868.85 396.243 29
 0 4 -7 640.11 201.568 3
 0 4 -7 670.835 192.763 4
 0 -4 7 759.654 216.089 29
 0 -4 7 885.472 325.534 26
 0 4 -6 18326.4 805.24 3
 0 4 -6 19308.1 615.053 28
 0 4 -6 16550 737.768 6
 0 -4 6 16377.1 868.345 29
 0 -4 6 16496.6 938.617 26
 0 4 -6 18802.2 815.544 4
 0 -4 5 4048.7 395.202 29
 0 -4 5 4984.33 458.579 26
 0 4 -5 4850.99 389.255 3
 0 4 -5 5048.86 264.278 28
 0 4 -5 4927.88 390.944 4
 0 4 -5 3646.64 314.516 6
 0 -4 4 14699.1 621.088 29
 0 4 -4 14074.2 582.539 3
 0 -4 4 15557.1 468.924 27
 0 -4 4 14627.9 636.869 26
 0 4 -4 14150.6 559.247 6
 0 4 -4 14800.2 607.57 4
 0 -4 3 1097.74 170.431 29
 0 -4 3 1002.81 181.915 26
 0 -4 3 1153.02 136.258 27
 0 4 -3 1206.44 172.757 4
 0 4 -3 1186.15 165.247 3
 0 4 -3 961.544 143.597 6
 0 -4 2 16624.6 401.905 25
 0 -4 2 16371.7 578.932 29
 0 4 -2 16418.5 506.383 3
 0 -4 2 16238.7 497.571 27
 0 4 -2 17263.2 557.252 4
 0 4 -2 16448.5 519.631 6
 0 4 -2 16425.4 565.267 2
 0 4 -1 25133.7 627.569 4
 0 4 -1 24821.4 534.675 3
 0 4 -1 24474 624.736 6
 0 4 -1 22707.1 686.749 5
 0 -4 1 24531.6 650.854 27
 0 -4 1 24450.3 593.013 25
 0 4 -1 24523.6 695.071 2
 0 -4 0 110.68 77.3062 25
 0 -4 0 113.572 38.0797 28
 0 -4 0 141.909 82.7445 27
 0 4 0 110.681 88.6987 2
 0 4 0 102.313 50.4315 4
 0 4 0 115.73 35.6061 3
 0 4 0 100.57 101.292 5
 0 4 1 4082.68 226.953 4
 0 4 1 3828.46 305.969 5
 0 4 1 3963.62 321.471 2
 0 -4 -1 3672.58 293.569 25
 0 -4 -1 3842.59 306.867 27
 0 -4 -1 3915.63 236.154 28
 0 -4 -2 1007.67 187.694 25
 0 -4 -2 1342.31 213.006 27
 0 4 2 997.661 201.989 2
 0 4 2 1065.06 179.714 5
 0 -4 -2 1239.74 155.093 28
 0 4 3 54596 1358.6 2
 0 -4 -3 55726.2 1209.48 28
 0 -4 -3 55246.9 1336.28 25
 0 4 3 53478.4 1250.62 5
 0 -4 -4 9544.98 602.199 25
 0 -4 -4 10034.2 578.445 28
 0 4 4 10655.7 605.749 5
 0 -4 -4 9284.88 602.091 27
 0 4 4 9759.87 633.132 2
 0 -4 -5 5351.59 483.078 27
 0 -4 -5 5801.56 516.479 25
 0 4 5 6915.07 515.583 5
 0 -4 -5 5888.42 491.677 28
 0 4 5 6212.98 548.085 2
 0 -4 -6 1620.4 297.881 28
 0 4 6 1799.09 152.652 20
 0 4 6 1870.07 341.369 2
 0 4 6 1993.46 164.045 18
 0 -4 -6 1842.92 320.578 25
 0 4 6 1781.66 148.505 23
 0 -4 -6 1695.04 310.187 27
 0 4 6 1702.52 147.816 33
 0 -4 -7 3649.12 208.215 39
 0 -4 -7 3564.75 233 35
 0 4 7 3160.24 210.532 18
 0 -4 -7 3359.11 433.265 27
 0 -4 -7 3294.64 424.936 25
 0 4 7 3778.41 208.972 38
 0 4 7 3158.09 204.787 33
 0 4 7 3311.2 213.453 23
 0 4 7 3347.16 212.963 20
 0 4 7 3208.39 461.996 2
 0 -4 -7 2455.91 357.205 28
 0 4 7 3615.2 209.088 24
 0 -4 -8 295.51 62.1721 39
 0 4 8 332.01 86.2281 23
 0 4 8 321.039 72.5749 18
 0 -4 -8 293.474 90.0697 35
 0 4 8 537.147 96.5026 20
 0 4 8 248.878 62.2106 38
 0 4 8 339.373 84.7777 33
 0 4 8 499.179 81.569 24
 0 4 9 -50.2528 53.1589 23
 0 4 9 -43.086 53.4742 18
 0 4 9 -12.3852 39.1418 38
 0 4 9 -129.325 50.7612 24
 0 -4 -9 -102.393 69.4724 35
 0 4 9 -17.2951 48.875 20
 0 4 10 37.5325 55.7349 23
 0 4 10 30.7561 38.2923 14
 0 4 10 40.7636 31.2565 20
 0 4 10 60.3434 34.4218 38
 0 4 10 94.5258 36.4991 24
 0 4 10 9.29891 45.5141 21
 0 -4 -10 15.401 39.9284 35
 0 -4 -11 32.0373 20.6166 35
 0 4 11 84.4674 35.4099 14
 0 -4 -11 81.2281 33.5822 12
 0 4 11 96.9571 41.6138 23
 0 4 11 31.8152 33.7724 21
 0 -5 14 890.327 70.4711 37
 0 5 -14 887.105 74.0897 35
 0 -5 14 758.951 71.3625 17
 0 5 -14 825.326 69.0882 16
 0 -5 13 16.4743 35.376 37
 0 5 -13 19.7251 44.2112 39
 0 -5 13 88.8402 54.4619 17
 0 5 -13 -7.12812 46.5509 35
 0 5 -13 -26.5748 32.5394 13
 0 5 -12 1744.55 153.841 35
 0 5 -12 2025.13 160.045 39
 0 -5 12 1861.59 153.603 37
 0 5 -12 1678.21 138.307 13
 0 5 -11 9.75054 61.5284 35
 0 5 -11 72.2459 53.3241 13
 0 5 -11 3.33843 49.7485 39
 0 -5 11 30.1927 54.5745 37
 0 -5 10 4478.41 243.837 37
 0 5 -10 4163.27 238.973 35
 0 5 -10 4344.94 242.655 13
 0 5 -10 4071.85 234.02 39
 0 5 -9 1481.24 295.998 4
 0 5 -9 1359.04 139.571 35
 0 5 -9 1217.83 247.473 6
 0 5 -9 1455.87 136.83 10
 0 -5 9 1274.82 130.994 37
 0 5 -9 1412.08 140.032 13
 0 5 -9 1369.07 134.844 39
 0 -5 9 1100.88 312.168 26
 0 -5 9 1548.53 316.961 29
 0 5 -9 1343.21 289.173 3
 0 5 -8 657.949 216.78 3
 0 -5 8 620.888 239.986 29
 0 -5 8 726.779 301.515 26
 0 5 -8 59.4982 99.1966 4
 0 5 -7 8.62247 77.2804 6
 0 5 -7 226.523 167.051 4
 0 5 -7 126.199 136.662 3
 0 -5 7 -56.046 211.382 26
 0 -5 7 221.653 186.175 29
 0 5 -6 490.048 190.957 4
 0 -5 6 474.43 223.572 29
 0 5 -6 296.849 129.707 3
 0 5 -6 516.506 153.863 6
 0 -5 6 495.509 256.097 26
 0 -5 5 22550.1 920.519 29
 0 5 -5 21630.6 847.556 4
 0 5 -5 21989.7 840.797 3
 0 -5 5 22974.7 943.176 26
 0 5 -5 21749.6 798.175 6
 0 -5 4 29134.4 938.928 29
 0 5 -4 29434.6 924.201 4
 0 5 -4 28868.1 893.654 3
 0 -5 4 32340.7 765.4 27
 0 5 -4 28874.5 848.509 6
 0 -5 4 29091 953.383 26
 0 5 -3 13010.2 546.088 3
 0 -5 3 11835.2 567.716 29
 0 5 -3 12536.3 530.912 6
 0 -5 3 12511.8 597.6 26
 0 -5 3 12865 494.6 27
 0 5 -3 11756.6 551.427 4
 0 5 -2 25363.5 667.906 3
 0 -5 2 23305.8 791.428 29
 0 5 -2 24315.5 738.519 4
 0 5 -2 23863.6 776.147 2
 0 -5 2 24605 715.567 27
 0 -5 2 26422.8 621.276 25
 0 5 -2 24248 712.922 6
 0 -5 1 256.144 85.4095 27
 0 5 -1 240.526 56.1858 3
 0 5 -1 59.5198 105.136 2
 0 5 -1 247.164 89.1643 4
 0 -5 1 297.384 96.0366 25
 0 5 -1 333.21 138.184 5
 0 5 -1 85.621 82.5227 6
 0 5 0 871.078 130.874 4
 0 5 0 783.06 178.564 2
 0 -5 0 480.311 135.07 27
 0 5 0 853.149 172.567 5
 0 -5 0 783.723 136.489 25
 0 -5 -1 8698.24 501.552 25
 0 -5 -1 8833.18 515.087 27
 0 5 1 8460.17 526.671 2
 0 5 1 8603.33 510.309 5
 0 -5 -2 2195.63 291.697 27
 0 -5 -2 2987.5 264.859 28
 0 5 2 2246.45 308.416 2
 0 -5 -2 2660.63 306.853 25
 0 5 2 2246.03 278.493 5
 0 -5 -3 -46.6299 115.211 25
 0 5 3 87.0467 127.968 2
 0 -5 -3 76.49 109.882 27
 0 5 3 67.0763 74.6939 5
 0 -5 -3 226.776 80.776 28
 0 -5 -4 3149.88 375.237 27
 0 5 4 2998.45 388.034 2
 0 -5 -4 3550.88 357.556 28
 0 -5 -4 3050.09 386.984 25
 0 5 4 3121.47 361.894 5
 0 5 5 2399.22 175.305 33
 0 -5 -5 2358.4 350.175 27
 0 -5 -5 3069.93 403.482 25
 0 -5 -5 2533.05 336.836 28
 0 5 5 2811.17 193.044 11
 0 5 5 2518.5 180.793 20
 0 5 5 2889.39 189.466 18
 0 5 5 2939.56 406.089 2
 0 -5 -6 2101.43 353.241 25
 0 5 6 1431.24 146.827 20
 0 -5 -6 1282.39 279.676 27
 0 5 6 1367.83 143.288 33
 0 5 6 1657.44 350.143 2
 0 5 6 1462.91 146.944 18
 0 5 6 1420.55 141.66 23
 0 5 7 2824.52 202.089 18
 0 5 7 3038.73 202.845 23
 0 5 7 2839.17 198.919 33
 0 5 7 3053.31 205.05 20
 0 -5 -7 3158 219.464 35
 0 5 8 77.9954 56.1035 20
 0 5 8 67.2124 60.9796 23
 0 -5 -8 59.7567 69.6758 35
 0 5 8 96.2371 62.9185 21
 0 5 8 77.7755 58.3428 18
 0 5 9 47.159 48.2341 14
 0 -5 -9 60.6803 42.1547 35
 0 5 9 104.532 55.9998 23
 0 5 9 100.692 57.8722 18
 0 5 9 65.2664 44.1015 20
 0 5 9 55.4762 59.8442 21
 0 5 10 63.0065 42.0146 21
 0 5 10 28.2932 32.8835 14
 0 -5 -10 20.2559 32.995 12
 0 -5 -10 11.836 22.0235 35
 0 5 10 48.0152 42.2963 23
 0 -6 14 64.4078 29.5907 17
 0 6 -14 85.7168 30.6669 16
 0 6 -14 66.4738 28.2882 35
 0 6 -13 878.907 86.2075 13
 0 6 -13 962.951 95.9975 35
 0 6 -13 923.342 96.1326 16
 0 -6 13 921.303 94.254 17
 0 -6 13 919.393 84.1157 37
 0 -6 12 1213.19 113.795 37
 0 -6 12 1434.41 131.823 17
 0 6 -12 1218.05 129.865 35
 0 -6 11 247.304 68.2091 37
 0 6 -11 182.369 66.5956 13
 0 6 -11 239.414 69.8736 39
 0 6 -11 230.561 85.7487 35
 0 6 -10 2100.25 176.477 35
 0 6 -10 2065.84 168.417 39
 0 6 -10 1898.19 166.911 13
 0 -6 10 2205.26 163.232 37
 0 -6 9 3423.73 482.522 29
 0 6 -9 4290.23 241.457 13
 0 6 -9 4199.06 478.049 6
 0 -6 9 3798.79 590.252 26
 0 6 -9 4350.61 244.368 35
 0 6 -9 3989.81 495.076 3
 0 6 -9 4340.04 238.73 39
 0 6 -9 4585.03 511.63 4
 0 6 -8 27524.2 582.773 13
 0 6 -8 27260.6 571.262 39
 0 6 -8 28230.8 1221.87 3
 0 6 -8 26756.4 1203.8 4
 0 6 -8 28161.1 592.156 35
 0 -6 8 25876.4 1483.25 26
 0 6 -8 27833.8 1145.11 6
 0 -6 8 25873 1342.81 29
 0 -6 7 271.14 245.381 26
 0 6 -7 -159.266 90.0235 6
 0 -6 7 404.647 188.764 29
 0 6 -7 62.9892 93.7483 4
 0 6 -7 233.435 139.599 3
 0 6 -6 20703.5 950.64 4
 0 -6 6 20471.3 1032.5 29
 0 6 -6 22461.8 961.807 3
 0 -6 6 22323.2 1100.91 26
 0 6 -6 24010.2 935.198 6
 0 -6 5 2383.28 331.745 29
 0 6 -5 2465.55 284.552 6
 0 6 -5 2510.19 318.092 4
 0 -6 5 2252.11 344.382 26
 0 6 -5 2393.2 304.344 3
 0 6 -4 64853.6 1393.52 3
 0 -6 4 68926.4 1265.68 27
 0 -6 4 61467.6 1490.81 29
 0 -6 4 62247.8 1514.28 26
 0 6 -4 62381.6 1453.39 4
 0 6 -4 66301.3 1377.46 6
 0 -6 3 14569.6 604.781 27
 0 6 -3 13749.4 644.197 4
 0 6 -3 14000.8 587.597 3
 0 -6 3 13311.4 679.75 29
 0 6 -3 13800.4 609.336 6
 0 -6 3 13767.8 697.677 26
 0 6 -2 22752.8 771.499 6
 0 -6 2 21215.7 767.594 27
 0 6 -2 20668.2 835.301 2
 0 6 -2 23001.9 778.391 4
 0 -6 2 20990.8 848.313 29
 0 -6 1 13437.9 636.978 27
 0 6 -1 12760.1 671.131 5
 0 -6 1 11751.3 545.295 25
 0 6 -1 12833.5 669.804 2
 0 -6 1 12745.8 671.642 29
 0 -6 0 1695.41 257.187 27
 0 -6 0 1694.25 232.41 25
 0 6 0 1541.83 264.291 2
 0 6 0 1346.29 221.7 5
 0 6 1 2326.08 334.451 2
 0 6 1 2709.14 321.744 5
 0 -6 -1 1961.73 284.642 25
 0 -6 -1 1728.38 272.475 27
 0 -6 -2 476.271 160.809 25
 0 6 2 265.068 141.266 2
 0 6 2 435.481 136.723 5
 0 -6 -2 468.965 151.255 27
 0 6 3 1111.37 250.863 2
 0 -6 -3 497.495 175.136 27
 0 -6 -3 459.042 165.341 25
 0 6 3 1149.46 221.491 5
 0 6 4 -75.2355 103.295 2
 0 6 4 177.482 61.5374 20
 0 6 4 254.694 77.2106 11
 0 6 4 79.2281 47.117 33
 0 6 4 117.551 41.6431 21
 0 -6 -4 48.1746 75.8664 27
 0 6 4 154.747 60.4917 18
 0 6 5 5094.18 255.342 23
 0 6 5 4835.06 257.76 21
 0 6 5 4962.27 258.529 33
 0 6 5 4576.7 249.172 20
 0 6 5 5148.03 258.969 18
 0 6 6 2271.12 179.335 21
 0 6 6 2381.47 181.857 18
 0 6 6 2349.41 183.79 20
 0 6 6 2214.1 178.125 33
 0 6 6 2383.5 180.17 23
 0 6 7 2269.01 171.204 23
 0 6 7 2139.72 169.787 21
 0 6 7 2182.17 170.669 20
 0 6 7 2304.91 174.871 18
 0 -6 -7 2249.16 178.77 35
 0 6 7 2303.33 174.005 14
 0 -6 -8 496.001 80.4377 35
 0 6 8 522.741 87.9928 23
 0 6 8 507.189 82.4392 20
 0 6 8 541.82 83.8998 18
 0 6 8 490.536 92.1284 21
 0 6 8 526.889 89.0622 14
 0 6 9 131.637 46.8784 14
 0 -6 -9 189.758 35.6631 35
 0 6 9 219.578 45.3137 20
 0 6 9 160.916 53.7672 21
 0 6 9 168.33 47.278 23
 0 7 -13 1485.93 108.875 16
 0 7 -13 1570.12 112.639 35
 0 -7 13 1290.42 97.5577 17
 0 7 -13 1484.15 95.5589 11
 0 7 -13 1720.43 113.191 13
 0 7 -12 286.22 70.2655 16
 0 7 -12 220.348 67.5851 13
 0 -7 12 197.331 57.0028 17
 0 7 -12 256.08 74.9312 35
 0 7 -11 -21.0776 67.2565 35
 0 7 -11 12.3931 55.0462 16
 0 7 -11 -17.2802 61.0596 13
 0 -7 11 -25.6523 40.2669 17
 0 7 -10 1853.95 164.594 16
 0 7 -10 1950.69 167.646 13
 0 -7 10 2167.08 172.296 17
 0 7 -10 2032.22 166.869 35
 0 7 -9 433.06 92.3014 35
 0 7 -9 437.243 91.0765 13
 0 7 -9 484.747 93.2551 16
 0 -7 9 573.669 98.2104 17
 0 7 -8 2951.36 202.829 16
 0 -7 8 3310.32 514.919 29
 0 7 -8 3113.7 411.278 4
 0 7 -8 3234.76 208.016 35
 0 7 -8 2876.28 202.442 13
 0 -7 8 2587.12 518.518 26
 0 7 -8 2465.09 382.293 3
 0 7 -7 267.369 135.768 4
 0 7 -7 261.31 141.711 3
 0 7 -7 -95.0868 48.4582 15
 0 -7 7 -170.361 177.018 29
 0 7 -7 18.3048 40.8293 35
 0 7 -7 78.9243 38.5751 13
 0 -7 7 -17.4077 203.674 26
 0 7 -7 80.2799 54.2209 16
 0 -7 6 15055.9 942.66 26
 0 7 -6 14623.1 806.35 3
 0 7 -6 13914.1 815.923 4
 0 -7 6 14508.7 922.18 29
 0 7 -5 -24.527 110.892 4
 0 -7 5 -286.187 152.296 29
 0 7 -5 -57.701 76.0555 3
 0 -7 5 63.3173 195.516 26
 0 -7 4 12099.7 732.509 26
 0 -7 4 12374.8 740.465 29
 0 7 -4 14554.3 747.272 4
 0 -7 3 16541.6 725.06 27
 0 -7 3 14672 787.161 26
 0 7 -3 16289.5 742.386 4
 0 -7 3 13749.3 759.004 29
 0 -7 2 854.082 210.617 29
 0 7 -2 657.493 189.956 2
 0 -7 1 512.233 179.173 29
 0 -7 1 634.175 154.511 27
 0 7 -1 911.592 221.239 2
 0 -7 0 3281.06 399.337 29
 0 -7 0 2887.86 354.353 27
 0 -7 0 3557.2 379.872 25
 0 7 0 3937.95 417.721 5
 0 7 0 3688.94 418.526 2
 0 -7 -1 -292.158 136.898 27
 0 7 1 28.7442 126.205 2
 0 7 1 -146.753 81.9482 5
 0 -7 -1 -113.337 121.941 25
 0 7 2 209.161 49.2317 14
 0 -7 -2 180.326 150.4 27
 0 7 2 164.222 68.4856 16
 0 7 2 155.002 59.1198 8
 0 7 2 165.56 74.3147 11
 0 7 2 322.037 129.953 2
 0 7 2 267.412 133.148 5
 0 7 2 201.709 58.653 21
 0 7 2 226.91 62.5915 20
 0 7 2 219.997 59.6692 33
 0 7 3 23.1828 34.1058 14
 0 7 3 427.032 171.253 2
 0 -7 -3 329.851 135.885 27
 0 7 3 0.31242 50.7928 20
 0 7 3 7.67313 44.0545 21
 0 7 3 40.9024 44.9443 8
 0 -7 -3 425.268 160.917 25
 0 7 3 14.0744 69.2075 11
 0 7 3 83.076 51.7199 18
 0 7 3 46.4778 40.2139 33
 0 7 4 12.6158 38.4057 23
 0 7 4 55.3069 49.7226 14
 0 7 4 -40.4417 39.2899 21
 0 7 4 72.085 52.8452 33
 0 7 4 6.17593 70.1184 11
 0 7 4 45.8064 34.8614 18
 0 7 4 51.4525 48.4444 20
 0 7 5 3078.75 204.148 33
 0 7 5 2602.46 184.867 14
 0 7 5 3041.97 208.529 20
 0 7 5 3050.43 196.879 18
 0 7 5 2959 199.54 21
 0 7 5 3190.05 198.576 23
 0 7 6 611.989 99.5884 14
 0 7 6 755.201 98.0952 23
 0 7 6 853.429 109.407 18
 0 7 6 701.87 111.395 20
 0 7 6 771.301 109.712 21
 0 -7 -7 -6.53895 43.4972 35
 0 7 7 -76.6914 58.2214 14
 0 7 7 1.39533 49.4594 21
 0 7 7 9.05882 51.5419 20
 0 7 7 17.1659 43.1481 23
 0 7 7 6.9403 41.4091 18
 0 7 8 118.228 47.4547 20
 0 7 8 125.823 48.273 14
 0 -7 -8 23.0212 25.6816 35
 0 7 8 52.8577 41.7613 21
 0 7 8 107.896 37.6302 23
 0 7 9 42.1049 21.3507 21
 0 7 9 -75.0691 22.2811 14
 0 8 -13 213.615 34.0198 11
 0 8 -13 240.139 48.1383 13
 0 -8 13 161.18 31.0223 17
 0 8 -12 1978.72 137.328 16
 0 8 -12 2166.35 142.35 35
 0 8 -12 2169.85 147.934 13
 0 8 -12 1993.9 130.418 11
 0 -8 12 1956.05 124.737 17
 0 -8 11 905.501 104.69 17
 0 8 -11 786.329 109.019 35
 0 8 -11 770.678 110.333 13
 0 8 -11 735.316 99.4379 16
 0 8 -11 890.529 105.954 11
 0 8 -10 3746.27 219.269 35
 0 8 -10 3837.8 224.534 13
 0 -8 10 4186.74 232.208 17
 0 8 -10 3474.65 212.203 16
 0 8 -9 2694.99 193.435 35
 0 8 -9 2881.59 199.341 16
 0 8 -9 2734.27 193.118 13
 0 8 -8 676.538 106.029 13
 0 8 -8 885.677 112.546 15
 0 8 -8 734.542 110.977 11
 0 8 -8 721.799 112.902 16
 0 8 -8 715.701 105.093 35
 0 8 -7 1023.98 122.267 35
 0 8 -7 948.121 120.263 16
 0 8 -7 960.163 233.468 4
 0 8 -7 990.232 124.76 11
 0 -8 7 1020.95 303.881 26
 0 -8 7 1040.79 304.185 29
 0 8 -7 911.208 120.832 15
 0 8 -7 974.577 122.49 13
 0 8 -6 1410.64 290.628 4
 0 8 -6 1162.73 130.883 11
 0 -8 6 1083.43 268.231 29
 0 8 -6 1364.1 137.983 16
 0 -8 6 1275.12 312.972 26
 0 8 -6 1337.79 135.478 13
 0 8 -6 1364.62 139.846 15
 0 8 -5 192.95 73.3203 15
 0 8 -5 340.375 79.7963 11
 0 8 -5 419.778 162.842 4
 0 8 -5 209.319 68.5797 16
 0 -8 5 516.649 177.732 29
 0 8 -5 228.03 57.2009 9
 0 -8 5 544.783 194.639 26
 0 8 -5 360.338 67.5595 13
 0 8 -4 493.138 89.7586 8
 0 8 -4 392.981 72.5021 9
 0 -8 4 538.023 191.792 26
 0 8 -4 500.202 85.8256 15
 0 8 -4 486.135 90.992 11
 0 -8 4 373.936 173.41 29
 0 8 -4 595.026 91.0736 16
 0 -8 3 2094.57 322.745 26
 0 8 -3 2210.79 164.111 8
 0 8 -3 2249.82 171.095 11
 0 8 -3 2116.74 168.629 16
 0 8 -3 2388.07 180.291 15
 0 8 -3 2347.1 174.908 22
 0 -8 3 2179.91 337.769 29
 0 8 -3 2137.27 156.494 9
 0 -8 2 -122.53 90.8887 27
 0 -8 2 -198.56 147.367 29
 0 8 -2 55.4676 39.4095 34
 0 8 -2 104.015 49.9926 11
 0 8 -2 45.5904 43.085 22
 0 8 -2 98.3234 48.6352 8
 0 -8 2 -256.911 145.531 26
 0 8 -2 169.902 54.1389 16
 0 8 -2 150.282 59.1022 15
 0 8 -2 12.8173 147.666 2
 0 -8 1 1835.77 280.842 27
 0 8 -1 1777.24 154.075 15
 0 8 -1 1625.91 297.97 2
 0 8 -1 2042.27 171.443 11
 0 8 -1 1758.3 150.931 22
 0 8 -1 1751.14 156.138 8
 0 8 -1 1791.55 160.142 16
 0 -8 1 1567.1 288.969 29
 0 8 0 7943 323.981 8
 0 8 0 9296.44 704.231 2
 0 -8 0 7858.7 642.245 29
 0 8 0 8940.55 324.138 21
 0 8 0 8187.09 329.531 16
 0 -8 0 7424.7 594.133 27
 0 8 0 8565.72 336.581 11
 0 8 1 3061.97 423.27 2
 0 8 1 3191.32 200.593 21
 0 -8 -1 3271.86 412.513 25
 0 -8 -1 3307.09 427.787 29
 0 8 1 2908.25 207.633 16
 0 8 1 3036.7 201.323 20
 0 8 1 2791.21 195.678 8
 0 -8 -1 2754.13 396.752 27
 0 8 1 2758.17 199.269 11
 0 8 2 1205.01 140.631 11
 0 8 2 1187.83 135.147 8
 0 8 2 1019.15 126.964 20
 0 8 2 1144.4 124.325 21
 0 8 2 1351.79 126.857 14
 0 8 2 1254.29 126.533 33
 0 8 2 1321.45 152.869 16
 0 8 3 1322.77 134.417 8
 0 8 3 1380.83 134.419 33
 0 8 3 1419.17 140.135 21
 0 8 3 1224.15 143.59 11
 0 8 3 1289.79 143.167 20
 0 8 3 1440.72 136.646 14
 0 8 4 45.4694 48.4874 33
 0 8 4 133.785 54.693 14
 0 8 4 108.722 69.8918 20
 0 8 4 125.622 49.0826 21
 0 8 4 63.8866 41.8842 18
 0 8 4 103.516 51.8276 8
 0 8 4 179.225 81.436 11
 0 8 5 221.853 78.0745 20
 0 8 5 208.591 66.7478 21
 0 8 5 279.567 62.0037 18
 0 8 5 123.564 47.4933 23
 0 8 5 213.868 67.6359 14
 0 8 6 373.263 66.9678 21
 0 8 6 460.818 63.0763 23
 0 8 6 422.573 70.871 14
 0 8 6 405.204 64.2054 18
 0 8 6 493.006 88.4338 20
 0 -8 -6 400.601 72.9395 35
 0 8 7 57.9077 36.1049 21
 0 -8 -7 67.7167 26.6357 35
 0 8 7 68.7324 36.9772 14
 0 8 7 46.7596 20.4632 23
 0 8 7 61.9955 42.1928 20
 0 9 -13 615.473 49.0464 9
 0 9 -13 586.421 54.4772 13
 0 9 -12 2747.29 144.738 13
 0 9 -12 2505.73 129.547 11
 0 9 -12 2537.68 133.463 9
 0 9 -12 2401.5 129.871 16
 0 9 -11 1557.1 130.525 13
 0 9 -11 1556.49 124.425 11
 0 9 -11 1451.32 125.564 16
 0 9 -10 3073.91 189.608 16
 0 9 -10 2878.53 184.377 11
 0 9 -9 4003.51 206.804 15
 0 9 -9 3876.97 224.04 11
 0 9 -9 3615.78 213.92 13
 0 9 -9 3776.82 222.201 16
 0 9 -8 1435.02 149.86 16
 0 9 -8 1450.09 147.967 11
 0 9 -8 1746.85 151.292 15
 0 9 -8 1489.1 145.945 13
 0 9 -7 19040.5 501.064 16
 0 9 -7 18836.7 494.38 15
 0 9 -7 18460.5 497.766 11
 0 9 -7 19033.2 493.019 13
 0 9 -7 19027.6 489.003 9
 0 9 -6 10822.6 382.58 11
 0 9 -6 10926.4 384.808 16
 0 9 -6 11545.3 377.365 13
 0 9 -6 11570.7 398.646 15
 0 9 -6 11658.6 380.876 9
 0 9 -5 5024.35 241.82 13
 0 9 -5 5070.9 271.007 15
 0 9 -5 5195.91 254.835 8
 0 9 -5 4956.9 260.668 11
 0 9 -5 5226.24 269.692 16
 0 9 -5 5250.39 257.093 9
 0 9 -4 7877.21 334.909 15
 0 9 -4 7846.08 308.459 9
 0 -9 4 8187.66 677.501 29
 0 9 -4 7726.3 317.219 8
 0 9 -4 7949.83 327.45 11
 0 9 -4 7845.89 326.729 16
 0 -9 4 7719.66 674.73 26
 0 9 -3 366.61 90.7948 16
 0 9 -3 609.899 88.2652 9
 0 9 -3 482.039 85.6531 8
 0 9 -3 600.747 108.36 11
 0 -9 3 714.542 227.579 29
 0 9 -3 585.998 108.838 15
 0 9 -2 200.623 56.8914 9
 0 9 -2 299.698 91.0255 11
 0 9 -2 354.612 89.3555 15
 0 9 -2 259.598 77.664 8
 0 9 -2 257.778 86.8748 16
 0 9 -1 398.912 98.3738 16
 0 9 -1 375.752 98.5615 11
 0 9 -1 294.882 81.5368 8
 0 9 0 6802.39 292.715 20
 0 9 0 6368.7 299.361 8
 0 9 0 6315.1 298.154 11
 0 9 0 6851.26 285.294 21
 0 9 0 6340.39 301.236 16
 0 9 1 775.567 104.516 21
 0 9 1 701.053 112.409 8
 0 9 1 639.399 123.952 16
 0 9 1 736.574 124.17 11
 0 9 1 736.597 112.191 20
 0 9 2 2078.77 160.925 21
 0 9 2 2079.85 176.544 11
 0 9 2 2188.24 171.264 8
 0 9 2 2135.51 173.465 20
 0 9 3 116.47 73.6546 11
 0 9 3 -10.7718 41.9786 21
 0 9 3 -21.7645 50.273 8
 0 9 3 103.052 47.2042 14
 0 9 3 45.0433 63.1416 20
 0 9 4 81.9941 63.4933 20
 0 9 4 91.3837 51.2155 14
 0 9 4 43.1321 48.2905 21
 0 9 4 95.9915 45.9152 8
 0 9 5 215.099 54.5255 21
 0 -9 -5 105.144 40.433 35
 0 9 5 169.842 63.9542 20
 0 9 5 112.015 36.2656 14
 0 9 6 15.6454 26.7957 21
 0 9 6 45.4296 24.714 14
 0 10 -12 821.034 58.0275 9
 0 10 -12 922.422 64.9128 16
 0 10 -12 839.213 60.3739 11
 0 10 -11 269.634 56.9826 16
 0 10 -11 298.714 55.8028 9
 0 10 -11 260.422 57.238 11
 0 10 -11 230.97 52.9819 13
 0 10 -10 3888.03 191.325 16
 0 10 -10 3788.59 181.15 9
 0 10 -10 3994.34 191.909 13
 0 10 -10 3889.86 194.171 11
 0 10 -9 519.145 84.0575 9
 0 10 -9 608.764 90.5394 13
 0 10 -9 574.798 94.6428 11
 0 10 -9 495.841 92.022 16
 0 10 -8 949.84 124.808 11
 0 10 -8 793.651 104.397 15
 0 10 -8 870.798 102.933 13
 0 10 -8 793.949 112.935 16
 0 10 -8 726.322 95.9503 9
 0 10 -7 58.1674 47.9031 13
 0 10 -7 125.441 73.3592 15
 0 10 -7 36.1797 65.588 11
 0 10 -7 144.399 73.329 16
 0 10 -7 77.3107 47.0394 9
 0 10 -6 50.5437 71.3736 16
 0 10 -6 55.1886 78.3893 15
 0 10 -6 -21.8605 65.5438 11
 0 10 -6 -13.8623 35.887 9
 0 10 -5 12282.6 382.003 8
 0 10 -5 12392.4 377.392 9
 0 10 -5 11478.2 390.157 16
 0 10 -5 11647.5 398.318 15
 0 10 -5 12290.9 405.275 11
 0 10 -4 1718.74 168.748 15
 0 10 -4 1622.65 141.334 9
 0 10 -4 1541.06 156.929 16
 0 10 -4 1461.51 152.747 11
 0 10 -4 1571.32 148.984 8
 0 10 -3 3022.86 207.677 11
 0 10 -3 3083.79 207.877 8
 0 10 -3 2970.87 210.669 16
 0 10 -3 3061.99 187.574 9
 0 10 -2 682.675 116.549 11
 0 10 -2 726.987 112.792 8
 0 10 -2 653.246 119.611 16
 0 10 -1 301.456 92.5754 16
 0 10 -1 308.519 88.9923 11
 0 10 -1 256.196 83.0992 8
 0 10 -1 360.016 74.6503 20
 0 10 0 3961.75 234.148 16
 0 10 0 4051.21 215.641 20
 0 10 0 4118.56 234.855 8
 0 10 0 3913.26 231.144 11
 0 10 1 5481.42 255.346 11
 0 10 1 5193.62 249.842 8
 0 10 1 5291.44 240.566 20
 0 10 1 5746.59 234.608 21
 0 10 2 32.42 51.1711 8
 0 10 2 35.7466 63.335 11
 0 10 2 0.20749 32.3325 21
 0 10 2 20.0779 47.4909 20
 0 10 3 51.1849 43.0569 8
 0 10 3 65.6496 37.7652 21
 0 10 3 82.9334 56.2269 20
 0 -10 -4 52.7737 29.1829 35
 0 10 4 32.1606 23.4756 21
 0 10 4 30.7163 41.7321 20
 0 10 5 250.982 38.5207 20
 0 11 -11 -13.1059 23.9471 11
 0 11 -11 -23.7888 20.7419 16
 0 11 -10 264.022 41.8241 9
 0 11 -10 253.416 54.8263 11
 0 11 -10 265.681 52.001 16
 0 11 -9 2136.54 142.661 11
 0 11 -9 1986.83 132.09 16
 0 11 -9 1895.66 115.656 9
 0 11 -8 109.985 68.2105 11
 0 11 -8 153.843 45.3761 9
 0 11 -8 200.747 70.3912 16
 0 11 -7 3170.46 188.507 16
 0 11 -7 3230.21 196.767 11
 0 11 -7 3194.94 168.056 9
 0 11 -6 -68.2172 61.4059 16
 0 11 -6 -26.9365 76.35 11
 0 11 -6 23.6489 37.6516 9
 0 11 -5 -10.2329 72.741 11
 0 11 -5 25.9868 33.6829 9
 0 11 -5 34.349 48.5561 8
 0 11 -5 -118.642 81.0196 16
 0 11 -4 298.984 75.8337 8
 0 11 -4 357.93 93.6849 11
 0 11 -4 245.684 84.8379 16
 0 11 -3 308.308 80.2818 8
 0 11 -3 287.476 90.0577 11
 0 11 -3 267.766 88.2328 16
 0 11 -2 72.9197 64.6985 8
 0 11 -2 149.94 76.5107 16
 0 11 -2 65.2286 80.9488 11
 0 11 -1 582.952 102.1 11
 0 11 -1 510.484 98.0258 8
 0 11 -1 542.356 101.107 16
 0 11 -1 534.98 72.9359 20
 0 11 0 1184.33 119.137 11
 0 11 0 1116.93 117.585 8
 0 11 0 1284.12 105.122 20
 0 11 1 1096.55 102.533 11
 0 11 1 1050.26 101.683 8
 0 11 1 950.84 88.3831 20
 0 11 2 346.179 54.7732 20
 0 11 2 271.311 48.8786 8
 0 11 3 -0.94931 21.4457 20
 0 12 -9 -41.5934 27.6208 16
 0 12 -9 7.07279 29.9014 11
 0 12 -8 125.5 48.507 11
 0 12 -8 108.255 42.6099 16
 0 12 -7 20.0991 43.6375 16
 0 12 -7 119.343 55.2852 11
 0 12 -6 2272.14 141.8 11
 0 12 -6 2232.34 135.404 16
 0 12 -5 417.849 63.0947 8
 0 12 -5 325.865 74.5081 11
 0 12 -5 289.696 69.1853 16
 0 12 -4 1719.85 120.855 8
 0 12 -4 1730.4 129.183 11
 0 12 -4 1676.92 125.783 16
 0 12 -3 115.061 59.456 11
 0 12 -3 183.655 60.0009 8
 0 12 -3 234.219 68.3242 16
 0 12 -2 1827.42 124.179 16
 0 12 -2 1653.61 119.401 11
 0 12 -2 1933.29 127.129 8
 0 12 -1 504.3 67.9416 11
 0 12 -1 565.81 73.0624 8
 0 12 0 -11.081 34.9846 8
 0 13 -6 652.802 54.2403 11
 0 13 -5 1267.03 74.393 11
 0 13 -4 35.5392 26.5467 11
 -1 13 -1 507.263 47.2757 8
 -1 13 -2 52.4897 31.8473 8
 -1 13 -3 283.161 46.0799 8
 -1 13 -3 261.48 42.8084 11
 -1 13 -4 194.858 33.7563 8
 -1 13 -4 187.749 41.9161 11
 -1 13 -5 25.0447 34.3909 11
 -1 13 -6 861.935 70.2299 11
 -1 13 -7 26.1758 24.3509 11
 -1 12 1 3213.45 137.281 8
 -1 12 1 2956.64 119.168 20
 -1 12 0 392.92 55.0534 20
 -1 12 0 382.717 58.7285 11
 -1 12 0 417.764 72.955 8
 -1 12 -1 1015.19 105.452 8
 -1 12 -1 861.693 76.5661 20
 -1 12 -1 990.546 95.7637 11
 -1 12 -2 1450.64 119.618 11
 -1 12 -2 1696.72 126.594 16
 -1 12 -2 1658.5 132.606 8
 -1 12 -3 -13.042 56.7192 11
 -1 12 -3 25.4619 47.2393 16
 -1 12 -3 -38.1743 56.7413 8
 -1 12 -3 6.26064 30.8469 9
 -1 12 -4 1409.11 116.672 8
 -1 12 -4 1475.52 109.121 9
 -1 12 -4 1354.29 117.151 16
 -1 12 -4 1408.24 125.592 11
 -1 12 -5 0.18278 28.3062 9
 -1 12 -5 -28.5658 48.7432 16
 -1 12 -5 46.3847 34.6032 8
 -1 12 -5 39.986 57.4304 11
 -1 12 -6 45.5878 43.5836 16
 -1 12 -6 91.1038 42.1738 9
 -1 12 -6 79.136 60.7618 11
 -1 12 -7 197.867 53.8601 16
 1 -12 7 208.164 38.2968 32
 -1 12 -7 250.316 67.871 11
 -1 12 -7 244.134 53.7626 9
 1 -12 8 124.252 35.7177 32
 -1 12 -8 170.424 57.6353 11
 -1 12 -8 134.562 39.1033 9
 -1 12 -8 109.546 39.3463 16
 -1 12 -9 531.329 51.7046 9
 1 -12 9 465.381 51.6909 32
 -1 12 -10 95.4874 26.1905 11
 -1 11 4 42.497 26.9308 20
 -1 11 3 632.783 63.7012 8
 -1 11 3 682.213 74.4939 20
 -1 11 2 268.087 62.6006 8
 -1 11 2 233.039 58.1844 20
 -1 11 1 713.379 102.961 8
 -1 11 1 694.661 94.0725 11
 -1 11 1 809.248 95.6102 20
 -1 11 0 -43.2848 54.2232 20
 -1 11 0 6.70851 66.8443 8
 -1 11 0 77.3 62.6488 11
 -1 11 -1 1281.25 115.097 9
 -1 11 -1 1246.46 134.189 16
 -1 11 -1 1227.97 128.789 11
 -1 11 -1 1195.97 114.636 20
 -1 11 -1 1223.94 135.253 8
 -1 11 -2 -35.8402 39.0287 9
 -1 11 -2 -11.6369 62.1498 11
 -1 11 -2 -34.835 41.2889 20
 -1 11 -2 -64.1314 71.672 8
 -1 11 -2 68.0044 69.5505 16
 -1 11 -3 3908.45 220.391 8
 -1 11 -3 4245.88 231.126 11
 -1 11 -3 4273.06 231.348 16
 -1 11 -3 4489.85 224.985 9
 -1 11 -4 2013.03 158.09 8
 -1 11 -4 2081.78 158.636 9
 -1 11 -4 1956.06 160.078 16
 -1 11 -4 1964.8 166.403 11
 -1 11 -5 2546.98 186.329 11
 -1 11 -5 2360.79 156.809 8
 -1 11 -5 2349.08 170.626 16
 -1 11 -5 2404.64 168.431 9
 -1 11 -6 958.249 127.442 11
 -1 11 -6 966.361 112.45 16
 -1 11 -6 895.043 106.063 9
 -1 11 -7 1665.52 140.308 16
 -1 11 -7 1792.55 141.702 9
 -1 11 -7 1536.11 146.699 11
 -1 11 -8 4228.64 215.856 11
 -1 11 -8 3885.74 196.877 9
 -1 11 -8 4115.7 196.685 16
 -1 11 -9 280.665 57.5863 16
 -1 11 -9 335.95 65.8425 9
 -1 11 -9 294.363 70.0748 11
 -1 11 -10 183.781 41.2626 16
 -1 11 -10 210.212 53.6973 11
 -1 11 -10 273.284 52.5881 9
 -1 11 -11 786.857 59.6933 9
 1 -11 11 815.887 64.8024 32
 -1 11 -11 891.318 68.5282 11
 1 -10 -5 42.1605 32.1457 35
 -1 10 5 13.165 38.8979 20
 -1 10 4 520.395 64.3383 21
 -1 10 4 505.277 80.9546 20
 -1 10 4 540.463 65.1518 8
 -1 10 3 922.445 102.867 8
 -1 10 3 842.806 106.808 20
 -1 10 2 -28.6654 60.7137 20
 -1 10 2 72.3947 65.9287 11
 -1 10 2 -11.9984 56.6041 8
 -1 10 1 591.684 107.011 11
 -1 10 1 732.631 109.522 20
 -1 10 1 761.797 112.349 8
 -1 10 1 931.596 129.462 16
 -1 10 0 -10.8964 70.6403 16
 -1 10 0 -47.7024 62.9238 8
 -1 10 0 61.6241 49.2365 9
 -1 10 0 -43.8402 78.5377 11
 -1 10 0 -82.553 54.7922 20
 -1 10 -1 6571.36 294.408 11
 -1 10 -1 6807.98 290.569 9
 -1 10 -1 6256.22 292.062 16
 -1 10 -1 6772.38 302.09 8
 -1 10 -2 181.957 59.1942 9
 -1 10 -2 271.176 85.1616 8
 -1 10 -2 121.453 80.4416 16
 -1 10 -2 199.374 86.4472 11
 -1 10 -3 2572.68 190.703 11
 -1 10 -3 2853.92 188.22 34
 -1 10 -3 2713.6 194.973 16
 -1 10 -3 2688.12 191.501 8
 -1 10 -3 3051.47 200.756 9
 -1 10 -4 -84.7983 68.5237 11
 -1 10 -4 15.252 39.4962 8
 -1 10 -4 3.44613 60.8292 16
 -1 10 -4 27.2619 47.6595 34
 -1 10 -4 -9.69203 46.9972 9
 -1 10 -5 4984.14 259.828 16
 -1 10 -5 4824.03 260.468 15
 -1 10 -5 5600.37 253.971 34
 -1 10 -5 4726.32 256.754 11
 -1 10 -5 5262.33 249.872 8
 -1 10 -5 5113.29 257.299 9
 -1 10 -6 158.717 60.6842 9
 -1 10 -6 95.3647 67.6757 15
 -1 10 -6 71.5481 60.7736 16
 -1 10 -6 132.568 83.4017 11
 -1 10 -6 137.358 55.3173 13
 -1 10 -7 777.203 107.664 13
 -1 10 -7 795.332 111.638 9
 -1 10 -7 834.254 114.137 16
 -1 10 -7 760.012 117.3 11
 -1 10 -8 5093.74 257.122 11
 -1 10 -8 4854 242.382 9
 -1 10 -8 5362.13 251.463 16
 -1 10 -8 5157.53 247.431 13
 -1 10 -9 104.383 54.6512 13
 -1 10 -9 137.584 74.1751 11
 -1 10 -9 215.563 69.1293 9
 -1 10 -9 98.6052 55.9819 16
 -1 10 -10 144.937 54.2398 9
 -1 10 -10 114.559 48.8258 16
 -1 10 -10 91.1783 54.6854 11
 -1 10 -10 89.3817 57.4723 13
 -1 10 -11 1354.47 105.204 13
 -1 10 -11 1310.56 91.7627 16
 -1 10 -11 1266.76 104.007 11
 -1 10 -11 1249.41 99.0574 9
 1 -10 12 32.2269 23.3411 32
 -1 10 -12 51.9874 25.8628 11
 -1 10 -12 37.4278 25.3619 9
 1 -9 -7 46.5793 22.2856 35
 -1 9 7 105.456 34.8689 20
 -1 9 6 659.553 72.633 21
 -1 9 6 839.374 91.0484 20
 1 -9 -6 573.407 75.1049 35
 -1 9 6 646.816 65.124 23
 -1 9 6 683.044 70.6601 18
 -1 9 6 645.857 70.2566 14
 -1 9 5 19.5718 35.535 18
 -1 9 5 43.0472 64.582 20
 -1 9 5 4.0254 35.5374 14
 -1 9 5 -17.5562 40.8965 21
 -1 9 5 33.9718 32.9779 23
 -1 9 4 5.79806 41.9527 8
 -1 9 4 -12.759 37.4675 33
 -1 9 4 40.3364 34.8463 18
 -1 9 4 81.9417 67.2288 20
 -1 9 4 -41.657 38.3576 21
 -1 9 4 -52.0304 43.1055 14
 -1 9 4 32.2949 33.2462 23
 -1 9 3 259.254 79.7277 11
 -1 9 3 196.713 61.8937 33
 -1 9 3 319.598 71.7981 21
 -1 9 3 239.919 75.009 8
 -1 9 3 233.383 59.5258 18
 -1 9 3 210.206 80.5243 20
 -1 9 2 6867.04 306.638 16
 -1 9 2 7523.01 291.339 21
 -1 9 2 7401.14 294.104 33
 -1 9 2 7154.18 302.701 11
 -1 9 2 7568.55 297.023 18
 -1 9 2 7340.51 311.137 20
 -1 9 2 7303.58 309.133 8
 -1 9 1 3839.38 232.576 16
 -1 9 1 3867.65 230.397 11
 -1 9 1 3583.56 225.07 8
 -1 9 1 4067.21 230.247 9
 -1 9 0 5625.43 276.507 11
 -1 9 0 5490.32 274.317 16
 1 -9 0 5483.65 523.195 27
 -1 9 0 5546.38 275.724 8
 -1 9 0 5775.85 272.1 9
 -1 9 -1 4452.68 239.221 9
 1 -9 1 4950.62 512.466 26
 -1 9 -1 4468.98 240.009 34
 -1 9 -1 4622.02 254.992 11
 -1 9 -1 4512.56 245.463 8
 -1 9 -1 4711.75 510.018 2
 -1 9 -1 4341.5 243.102 16
 1 -9 1 3840.23 461.057 29
 1 -9 1 4740.59 479.649 27
 -1 9 -2 103.467 52.9181 34
 -1 9 -2 39.4363 43.8572 9
 -1 9 -2 138.882 63.7585 15
 1 -9 2 -50.0508 118.269 29
 -1 9 -2 167.175 65.5879 8
 -1 9 -2 105.939 69.8207 11
 -1 9 -2 93.9031 59.5537 16
 1 -9 2 23.9587 139.032 27
 1 -9 3 2287.47 359.311 29
 -1 9 -3 2099.66 178.742 15
 -1 9 -3 2566.71 179.863 34
 -1 9 -3 2354.93 183.44 11
 -1 9 -3 2399.39 185.408 16
 -1 9 -3 2322.03 180.098 8
 -1 9 -3 2315.72 176.367 9
 1 -9 3 1743.55 306.918 26
 -1 9 -4 80.7377 30.8481 13
 -1 9 -4 24.1461 54.1897 15
 -1 9 -4 -35.0014 41.6794 9
 1 -9 4 -162.888 122.088 26
 -1 9 -4 -9.03653 53.2967 11
 -1 9 -4 188.076 54.1962 8
 -1 9 -4 44.1923 49.7855 34
 -1 9 -4 -11.8111 58.6492 16
 -1 9 -5 1770.71 146.193 34
 -1 9 -5 1617.52 153.207 16
 -1 9 -5 1811.88 158.907 9
 -1 9 -5 1840.18 167.431 15
 -1 9 -5 1786.69 157.807 13
 1 -9 5 2144.04 395.935 29
 -1 9 -5 1641.31 155.365 11
 -1 9 -6 369.829 85.2021 15
 -1 9 -6 299.429 71.4348 13
 -1 9 -6 291.317 75.8013 9
 -1 9 -6 184.925 79.5459 11
 -1 9 -6 314.582 84.0316 16
 -1 9 -7 3031 205.033 13
 -1 9 -7 3654.18 216.472 15
 -1 9 -7 3400.47 213.571 16
 -1 9 -7 3186.39 212.683 11
 -1 9 -8 1083.87 134.737 11
 -1 9 -8 1187.9 133.12 16
 -1 9 -8 1146.45 131.533 13
 -1 9 -9 1388.12 142.04 13
 -1 9 -9 1278.32 130.099 16
 -1 9 -9 1364.57 143.491 11
 -1 9 -9 1228.76 138.318 35
 1 -9 10 449.093 83.4682 17
 -1 9 -10 440.146 89.0934 11
 -1 9 -10 534.071 98.7997 13
 -1 9 -10 427.339 74.066 16
 1 -9 11 1312.13 103.815 17
 -1 9 -11 1338.26 121.788 13
 -1 9 -11 1458.75 122.322 11
 -1 9 -11 1310.26 108.665 16
 -1 9 -12 1386.1 98.5514 11
 -1 9 -12 1416.1 90.5543 16
 -1 9 -12 1635.93 110.492 9
 -1 9 -12 1528.43 107.094 13
 -1 8 8 456.167 53.2962 14
 -1 8 8 354.028 48.8342 20
 -1 8 8 477.151 54.3781 21
 1 -8 -8 372.842 47.4024 35
 -1 8 8 508.308 52.8147 23
 -1 8 7 7.20818 35.9934 23
 1 -8 -7 -4.77296 42.4797 35
 -1 8 7 50.3845 39.4175 18
 -1 8 7 28.5801 45.1926 20
 -1 8 7 50.5865 42.4818 14
 -1 8 7 -4.02107 41.6868 21
 -1 8 6 679.682 90.9963 14
 -1 8 6 873.287 105.133 18
 -1 8 6 706.279 94.5251 21
 -1 8 6 759.434 104.778 33
 -1 8 6 771.928 108.451 20
 -1 8 6 822.937 98.5907 23
 -1 8 5 37.4307 47.6464 21
 -1 8 5 18.0161 50.3672 33
 -1 8 5 51.8308 43.6725 23
 -1 8 5 25.9709 65.6954 20
 -1 8 5 12.1312 40.3821 18
 -1 8 5 68.4004 44.5107 14
 -1 8 4 472.096 85.4062 18
 -1 8 4 530.981 85.6904 8
 -1 8 4 545.115 106.457 20
 -1 8 4 449.321 90.0125 21
 -1 8 4 465.189 90.8069 33
 -1 8 4 571.972 102.124 11
 -1 8 4 486.861 87.612 14
 -1 8 3 585.572 84.4558 14
 -1 8 3 487.678 85.2148 18
 -1 8 3 556.363 89.0153 21
 -1 8 3 486.946 96.9628 20
 -1 8 3 510.914 95.3853 11
 -1 8 3 485.569 88.1574 33
 -1 8 3 614.054 94.9808 8
 1 -8 -2 537.366 167.8 29
 -1 8 2 1030.03 120.989 9
 -1 8 2 1510.39 318.263 2
 -1 8 2 766.886 116.142 16
 -1 8 2 880.519 106.644 21
 -1 8 2 839.952 117.11 11
 1 -8 -2 433.187 170.716 27
 -1 8 2 1106.54 118.472 18
 1 -8 -2 919.928 214.418 25
 -1 8 2 841.323 115.197 8
 -1 8 2 1073.88 119.708 33
 -1 8 1 1677.5 153.221 11
 1 -8 -1 1465.97 278.388 29
 -1 8 1 1558.14 146.246 8
 -1 8 1 1693.52 148.121 9
 1 -8 -1 1377.8 253.464 25
 1 -8 -1 1488.86 286.274 27
 -1 8 1 1803.49 329.352 2
 -1 8 1 1642.93 155.11 16
 -1 8 0 9213.3 335.015 11
 -1 8 0 8921.52 329.335 34
 1 -8 0 8235.74 615.167 27
 -1 8 0 7829.93 646.113 2
 -1 8 0 9136.82 337.845 8
 -1 8 0 8546.74 326.78 16
 -1 8 0 9106.92 332.031 9
 1 -8 0 8160.38 641.551 29
 -1 8 -1 3536.91 210.8 8
 1 -8 1 3232.76 393.694 27
 1 -8 1 3325.83 426.376 29
 -1 8 -1 3831.87 446.275 2
 -1 8 -1 3633.79 215.891 15
 -1 8 -1 3646.71 208.334 34
 1 -8 2 14600.1 842.946 29
 1 -8 2 16025.2 820.432 27
 1 -8 2 14323.8 824.217 26
 -1 8 -2 15166 857.019 2
 -1 8 -3 1363.06 242.241 4
 1 -8 3 1180.01 250.503 26
 1 -8 3 950.899 201.247 27
 1 -8 3 1485 286.545 29
 -1 8 -4 133.288 62.7667 15
 1 -8 4 -33.2409 146.102 29
 1 -8 4 65.7561 84.9679 26
 -1 8 -4 85.7102 72.9593 4
 -1 8 -4 62.1902 51.6911 11
 -1 8 -4 161.14 49.7521 9
 1 -8 5 2429.74 394.947 29
 1 -8 5 2250.68 383.52 26
 -1 8 -5 2235.55 342.234 4
 -1 8 -5 2142.69 168.831 15
 -1 8 -5 2197.71 165.363 13
 -1 8 -5 2117.04 162.502 16
 -1 8 -5 2014.09 159.559 11
 -1 8 -6 2598.59 183.691 35
 -1 8 -6 2826.25 392.278 3
 -1 8 -6 2951.84 195.868 16
 -1 8 -6 2570.9 182.487 13
 1 -8 6 3138.18 481.627 26
 -1 8 -6 2881.98 383.567 4
 1 -8 6 2031.05 407.966 29
 -1 8 -6 2655.39 187.804 15
 -1 8 -7 61.1168 117.588 4
 -1 8 -7 166.325 57.7051 16
 -1 8 -7 105.149 56.0765 13
 -1 8 -7 100.889 52.2863 35
 1 -8 7 135.57 109.014 26
 -1 8 -7 341.48 158.92 3
 -1 8 -8 59.6365 56.0242 13
 1 -8 8 156.917 49.536 17
 -1 8 -8 -20.5477 56.2962 35
 -1 8 -8 -12.3955 51.61 16
 -1 8 -9 4711.48 249.046 16
 -1 8 -9 4465.4 243.754 35
 1 -8 9 5041.39 260.989 17
 -1 8 -9 4743.01 255.236 13
 -1 8 -10 545.836 93.2562 16
 -1 8 -10 539.004 99.9225 35
 -1 8 -10 527.351 102.629 13
 1 -8 10 675.486 100.106 17
 1 -8 11 10318.9 323.135 17
 -1 8 -11 10302.8 318.495 16
 -1 8 -11 10733.5 336.233 35
 -1 8 -11 11279.2 346.76 13
 -1 8 -12 -1.73721 32.4395 16
 -1 8 -12 -7.58274 40.7008 35
 1 -8 12 -12.0766 38.0603 17
 -1 8 -12 -19.0352 47.7618 13
 -1 8 -12 -22.0215 38.2397 11
 1 -8 13 298.671 40.5165 17
 -1 8 -13 275.436 41.0204 11
 -1 8 -13 256.77 36.6736 16
 -1 7 9 448.133 59.8607 14
 -1 7 9 443.216 46.955 20
 -1 7 9 491.537 61.6386 21
 -1 7 9 464.01 58.2178 23
 1 -7 -9 369.591 50.0157 35
 -1 7 8 135.577 51.8452 14
 1 -7 -8 129.254 54.7596 35
 -1 7 8 135.452 51.3099 20
 -1 7 8 215.43 62.9606 23
 -1 7 8 117.143 52.9997 18
 -1 7 8 180.593 57.4993 21
 -1 7 7 124.47 60.8472 21
 -1 7 7 57.4575 50.381 23
 1 -7 -7 138.091 85.4252 35
 -1 7 7 -12.631 45.3254 18
 -1 7 7 63.9907 58.616 20
 -1 7 7 62.0718 53.376 14
 -1 7 7 -7.28707 57.0817 33
 -1 7 6 63.6426 49.6734 21
 -1 7 6 -3.8694 49.2167 23
 -1 7 6 -69.5195 61.8789 33
 -1 7 6 13.9007 60.0956 20
 -1 7 6 0.30852 44.5576 18
 -1 7 5 1647.4 155.394 18
 -1 7 5 1612.99 157.879 20
 -1 7 5 1635.59 154.383 33
 -1 7 5 1495.98 147.616 21
 1 -7 -4 575.577 197.402 27
 -1 7 4 394.732 80.9767 18
 -1 7 4 349.582 75.8105 8
 -1 7 4 271.029 60.5853 19
 -1 7 4 323.283 76.5763 33
 -1 7 4 285.476 65.802 21
 -1 7 4 239.785 75.8188 20
 -1 7 4 626.003 221.841 2
 -1 7 4 213.141 78.0296 11
 1 -7 -4 1.31736 94.6935 25
 -1 7 3 3195.19 195.535 8
 -1 7 3 3181.51 206.681 16
 -1 7 3 3144.9 199.185 33
 1 -7 -3 2594.11 369.454 27
 1 -7 -3 3324.93 414.618 25
 -1 7 3 3215.1 196.961 11
 -1 7 3 3432.44 203.624 21
 -1 7 3 3288.17 200.48 18
 -1 7 3 3065.71 421.058 2
 1 -7 -2 16502.2 870.287 27
 1 -7 -2 16729.3 870.245 25
 -1 7 2 17058.5 925.759 2
 1 -7 -1 2734.46 369.827 29
 1 -7 -1 2819.14 356.68 27
 1 -7 -1 2608.69 335.932 25
 -1 7 1 2782.18 376.586 2
 1 -7 0 3583.48 386.233 27
 1 -7 0 4377.44 429.705 29
 -1 7 0 3638.21 418.355 2
 1 -7 0 4800.27 413.435 25
 1 -7 1 10185.6 616.956 27
 1 -7 1 10881.5 668.512 29
 -1 7 -1 11789.1 613.951 4
 -1 7 -1 10654.2 671.548 2
 -1 7 -2 3854.12 393.827 2
 1 -7 2 4028.96 417.552 26
 1 -7 2 4050.44 384.275 27
 1 -7 2 4032.49 415.021 29
 -1 7 -2 3634.76 364.773 4
 1 -7 3 107.993 115.415 26
 1 -7 3 -38.4621 57.2359 27
 1 -7 3 152.511 157.326 29
 -1 7 -3 60.0119 43.1653 3
 -1 7 -3 63.6738 81.5084 4
 1 -7 4 48.5982 101.137 26
 -1 7 -4 95.5852 96.7282 3
 -1 7 -4 539.606 157.628 4
 1 -7 4 384.518 117.451 27
 1 -7 4 232.447 106.5 29
 1 -7 5 3950.69 491.501 29
 -1 7 -5 4640.39 441.648 3
 1 -7 5 4466.44 484.978 26
 -1 7 -5 4462.15 452.335 4
 -1 7 -6 4169.04 451.949 3
 1 -7 6 3949.17 519.631 29
 1 -7 6 4555.8 559.402 26
 -1 7 -6 4393.44 478.815 4
 -1 7 -7 34522.3 651.265 16
 -1 7 -7 33801.1 1353.2 4
 1 -7 7 34686.9 651.512 17
 -1 7 -7 35806.7 669.516 13
 -1 7 -7 34778.7 1351.67 3
 -1 7 -7 35138.1 658.516 35
 1 -7 7 31824.8 1575.53 26
 1 -7 7 31576.5 1523.52 29
 1 -7 8 97.3175 46.095 17
 -1 7 -8 343.226 150.184 4
 -1 7 -8 18.5947 49.0756 35
 -1 7 -8 -137.863 64.8903 13
 -1 7 -8 309.258 138.804 3
 1 -7 8 -407.852 263.371 29
 -1 7 -8 60.8115 40.3208 16
 -1 7 -9 6269.37 292.646 13
 -1 7 -9 6328.49 294.075 35
 -1 7 -9 6588.07 293.645 16
 1 -7 9 6679.57 297.907 17
 -1 7 -10 135.059 62.849 16
 1 -7 10 166.432 63.3282 17
 -1 7 -10 255.77 77.8396 13
 -1 7 -10 99.89 66.665 35
 -1 7 -11 2848.84 189.946 35
 1 -7 11 2889.76 162.191 37
 -1 7 -11 2731.33 181.421 13
 -1 7 -11 2995.44 187.073 16
 1 -7 11 2598.7 177.356 17
 -1 7 -12 27.7074 43.4743 35
 1 -7 12 31.7449 26.9482 37
 1 -7 12 10.8506 42.2715 17
 -1 7 -12 59.1745 44.2155 16
 -1 7 -12 87.2881 47.2078 13
 -1 7 -13 646.274 62.4201 16
 -1 7 -13 685.166 63.1736 13
 -1 7 -13 760.943 74.0477 35
 1 -7 13 706.263 76.0645 17
 1 -7 13 496.728 43.2435 37
 -1 6 10 -5.89514 29.2689 14
 1 -6 -10 77.4409 34.9625 12
 -1 6 10 -21.3603 34.2694 23
 -1 6 10 -9.10549 30.7164 21
 1 -6 -10 22.3316 25.5345 35
 -1 6 9 1193.17 112.074 21
 -1 6 9 1157.77 111.87 14
 -1 6 9 1339.99 120.298 23
 -1 6 9 1146.15 114.989 18
 -1 6 9 1352.1 104.105 20
 1 -6 -9 1183.05 110.535 35
 1 -6 -8 160.513 77.6037 35
 -1 6 8 213.354 72.0568 21
 -1 6 8 204.534 66.5896 20
 -1 6 8 334.685 90.8307 33
 1 -6 -8 249.462 50.8576 39
 -1 6 8 224.816 70.4862 18
 -1 6 8 257.336 75.2837 23
 -1 6 7 1359.66 143.293 33
 -1 6 7 1359.24 139.211 23
 -1 6 7 1499.13 143.558 20
 -1 6 7 1421.31 147.22 18
 1 -6 -7 1577.42 136.179 39
 -1 6 6 4386.44 246.599 33
 -1 6 6 4435.96 247.574 18
 -1 6 6 4673.41 248.97 20
 1 -6 -6 4703.96 236.81 39
 -1 6 5 317.799 79.856 33
 -1 6 5 287.269 80.799 11
 -1 6 5 301.037 76.6971 20
 -1 6 5 370.689 79.7169 18
 -1 6 5 166.129 58.8667 19
 1 -6 -5 357.567 137.411 27
 -1 6 5 296.116 125.6 2
 1 -6 -5 157.224 123.694 25
 1 -6 -5 301.569 68.1158 39
 -1 6 4 169.97 54.3171 19
 -1 6 4 368.46 158.142 2
 -1 6 4 279.72 61.5377 18
 -1 6 4 225.64 60.4856 33
 1 -6 -4 510.639 160.924 25
 1 -6 -4 424.989 168.984 27
 -1 6 3 -175.005 131.363 2
 1 -6 -3 -127.578 117.709 25
 1 -6 -3 23.8454 56.1596 27
 1 -6 -2 4332.77 417.195 27
 -1 6 2 4795.06 452.667 2
 1 -6 -2 4650.39 419.092 25
 -1 6 2 4936.8 410.173 5
 -1 6 1 1651.13 283.578 2
 1 -6 -1 1717.5 237.252 25
 1 -6 -1 1348.61 221.918 27
 -1 6 1 1570.24 223.649 5
 1 -6 0 36615.6 1001.26 25
 1 -6 0 34557.7 1094.26 29
 -1 6 0 35688.1 1120.05 2
 1 -6 0 35341.7 1063.79 27
 -1 6 0 37430.3 988.995 4
 1 -6 1 83.3322 127.061 29
 -1 6 -1 57.4712 145.376 2
 1 -6 1 -17.0438 101.173 27
 1 -6 1 153.938 60.0972 25
 -1 6 -1 135.576 56.4044 3
 -1 6 -1 87.1204 65.387 4
 1 -6 2 1519.57 238.328 29
 1 -6 2 1503.9 218.35 27
 -1 6 -2 1693.89 239.176 4
 -1 6 -2 1851.13 212.561 3
 -1 6 -2 1866.14 263.274 2
 1 -6 3 14447.6 710.833 29
 -1 6 -3 15039 546.541 6
 1 -6 3 12911 656.998 26
 1 -6 3 12990.4 592.309 27
 -1 6 -3 13205.4 655.95 4
 -1 6 -3 13351.1 628.044 3
 -1 6 -4 178.96 144.305 4
 1 -6 4 202.592 81.0564 27
 -1 6 -4 160.633 106.676 3
 1 -6 4 223.891 135.307 26
 1 -6 4 90.4917 148.391 29
 -1 6 -4 389.305 100.175 6
 -1 6 -5 565.605 129.491 6
 -1 6 -5 407.314 159.627 4
 1 -6 5 523.277 215.301 29
 -1 6 -5 553.492 177.598 3
 1 -6 5 557.431 124.806 27
 1 -6 5 600.292 200.42 26
 -1 6 -6 522.364 175.643 4
 -1 6 -6 588.596 169.94 6
 -1 6 -6 571.663 186.991 3
 1 -6 6 535.922 230.405 26
 1 -6 6 195.614 214.561 29
 1 -6 7 1401.81 352.355 26
 1 -6 7 791.558 274.107 29
 -1 6 -7 1045.83 256.208 3
 -1 6 -7 1418.08 289.325 4
 -1 6 -8 1055.36 255.417 4
 1 -6 8 1358.52 365.086 26
 -1 6 -8 932.949 110.649 39
 -1 6 -8 1084.01 122.27 35
 -1 6 -8 910.547 114.297 13
 1 -6 8 800.654 253.982 29
 -1 6 -8 964.233 290.434 3
 -1 6 -9 14136.7 427.69 13
 -1 6 -9 15261.1 422.021 12
 1 -6 9 14888.3 1144.26 26
 -1 6 -9 14012.6 431.356 35
 1 -6 9 14795.5 420.688 37
 -1 6 -9 15255.6 955.507 3
 -1 6 -9 13962.3 427.901 39
 -1 6 -9 13097.7 871.707 4
 1 -6 9 16364.2 1041.17 29
 -1 6 -10 587.291 90.0185 12
 -1 6 -10 586.545 100.231 39
 1 -6 10 703.115 98.9399 37
 -1 6 -10 687.546 104.918 35
 -1 6 -10 575.104 101.077 13
 1 -6 11 19.227 62.5243 17
 1 -6 11 36.1174 48.5008 37
 -1 6 -11 17.1242 51.3312 39
 -1 6 -11 11.9145 29.1789 12
 -1 6 -11 9.35388 57.0076 35
 -1 6 -11 44.4704 57.7315 13
 -1 6 -12 396.036 71.2925 13
 -1 6 -12 295.257 63.4062 35
 1 -6 12 339.526 81.6978 17
 1 -6 12 409.265 68.3545 37
 -1 6 -13 541.674 67.7021 35
 1 -6 13 555.763 65.0069 37
 -1 6 -13 462.258 61.1044 16
 -1 6 -13 456.78 53.7346 13
 1 -6 13 518.121 74.3074 17
 1 -6 14 554.14 48.3209 17
 -1 5 11 88.4191 34.6539 21
 1 -5 -11 70.6555 27.188 35
 -1 5 11 115.443 34.4096 14
 1 -5 -11 76.4439 31.7651 12
 -1 5 11 77.485 36.5622 23
 -1 5 10 232.285 61.792 14
 1 -5 -10 35.4249 25.2586 39
 -1 5 10 178.732 62.1296 21
 1 -5 -10 73.161 41.5442 35
 -1 5 10 151.845 39.332 24
 -1 5 10 111.81 58.5394 23
 -1 5 9 36.7662 60.9377 18
 -1 5 9 -26.9126 58.272 23
 -1 5 9 79.222 44.5226 20
 1 -5 -9 -92.3143 31.631 39
 1 -5 -9 17.1863 63.3914 35
 -1 5 9 86.1593 45.3307 24
 -1 5 8 4216.88 243.314 18
 1 -5 -8 4723.57 233.936 39
 -1 5 8 4708.17 252.142 23
 -1 5 8 4551.26 246.378 33
 1 -5 -8 4332.3 254.625 35
 -1 5 8 4838.61 244.206 20
 -1 5 8 4962.03 235.787 24
 -1 5 7 1405.98 141.854 20
 -1 5 7 1422.54 146.583 33
 1 -5 -7 1471.94 140.624 39
 -1 5 7 1364.93 145.602 18
 -1 5 7 1500.95 150.973 23
 -1 5 6 7851.71 315.12 20
 1 -5 -6 7317.22 631.075 25
 1 -5 -6 7065.84 573.368 28
 -1 5 6 8100.76 321.444 19
 1 -5 -6 7530.45 299.149 39
 -1 5 6 7424.6 308.459 33
 1 -5 -6 7522.34 627.904 27
 -1 5 6 7793.07 319.92 18
 -1 5 6 7377 648.74 2
 1 -5 -5 191.573 130.905 25
 -1 5 5 -17.4711 39.8627 2
 1 -5 -5 16.6632 119.771 27
 1 -5 -5 196.28 98.5187 28
 -1 5 4 800.334 206.471 2
 1 -5 -4 862.099 186.066 27
 1 -5 -4 1080.69 187.865 28
 1 -5 -4 832.357 194.095 25
 -1 5 3 63.3703 65.9736 5
 -1 5 3 237.295 144.824 2
 1 -5 -3 175.887 73.5938 28
 1 -5 -3 34.7868 96.8721 25
 1 -5 -2 4433.08 381.435 25
 1 -5 -2 5059.89 409.744 27
 -1 5 2 5003.82 361.114 5
 -1 5 2 4946.75 405.989 2
 1 -5 -2 5258.63 317.914 28
 -1 5 1 2169.26 240.957 5
 1 -5 -1 2012.47 236.311 25
 -1 5 1 2190.64 226.403 4
 1 -5 -1 2361.52 271.616 27
 -1 5 1 2240.9 274.128 2
 -1 5 1 2528.32 182.877 1
 -1 5 0 13367 544.665 4
 1 -5 0 12324.5 514.783 25
 1 -5 0 13181.4 585.201 27
 -1 5 0 12310.1 581.591 2
 -1 5 0 12845.3 553.404 5
 -1 5 -1 10523 386.012 6
 1 -5 1 9377.63 397.898 25
 1 -5 1 9918.54 514.321 29
 -1 5 -1 9542.04 476.35 4
 -1 5 -1 9825.25 426.051 3
 1 -5 1 9338.02 468.094 27
 -1 5 -1 9448.77 496.94 2
 -1 5 -2 3489.8 307.01 2
 -1 5 -2 3512.9 231.057 6
 -1 5 -2 3732.18 292.918 3
 1 -5 2 3490.98 277.312 27
 1 -5 2 3907.07 213.95 25
 1 -5 2 3638.98 322.277 29
 -1 5 -2 3645.4 306.23 4
 1 -5 3 2160.27 269.823 29
 1 -5 3 2007.93 216.519 27
 1 -5 3 1503.37 224.631 26
 -1 5 -3 2176.58 197.107 6
 -1 5 -3 1822.74 244.014 4
 -1 5 -3 2154.77 241.082 3
 -1 5 -4 1187.87 210.434 4
 -1 5 -4 979.56 180.995 3
 1 -5 4 791.018 226.077 29
 -1 5 -4 1451.35 186.697 6
 1 -5 4 1291.79 173.584 27
 1 -5 4 1432.32 235.624 26
 -1 5 -5 26129 960.883 4
 1 -5 5 25025 1043.62 26
 -1 5 -5 27995.8 853.396 6
 -1 5 -5 26347.3 955.207 3
 1 -5 5 27445.3 810.024 27
 1 -5 5 25924.4 1082.19 29
 1 -5 6 -293.212 221.864 26
 -1 5 -6 105.23 101.852 3
 -1 5 -6 -186.709 94.5334 6
 -1 5 -6 -130.123 113.6 4
 1 -5 6 25.1228 211.157 29
 -1 5 -7 22525.3 1015.41 4
 -1 5 -7 21483.6 1000.05 3
 1 -5 7 21266 1165.8 29
 1 -5 7 21589.2 1270.21 26
 -1 5 -7 24077.9 970.308 6
 1 -5 8 6151.01 754.247 26
 -1 5 -8 6626.91 283.212 39
 -1 5 -8 6747.22 559.436 6
 -1 5 -8 6329.84 583.559 3
 -1 5 -8 6994.37 287.274 13
 -1 5 -8 6499.15 574.577 4
 -1 5 -8 6814.57 289.303 35
 1 -5 8 6648.84 646.082 29
 -1 5 -9 2243.28 338.021 6
 -1 5 -9 1939.86 163.5 35
 1 -5 9 2492.59 480.58 26
 -1 5 -9 2062.44 348.94 4
 1 -5 9 1878.74 156.816 37
 -1 5 -9 1747.85 155.288 39
 -1 5 -9 1844.97 157.08 13
 -1 5 -9 1363.96 279.937 3
 -1 5 -9 1707.93 142.458 12
 1 -5 9 1537 310.87 29
 -1 5 -10 1807.6 153.067 12
 -1 5 -10 1573.32 144.489 13
 -1 5 -10 1555.27 152.35 35
 1 -5 10 1573.71 150.878 37
 -1 5 -10 1607.78 152.576 39
 -1 5 -11 1379.06 141.095 35
 -1 5 -11 1449.5 135.052 13
 1 -5 11 1293.47 135.252 37
 -1 5 -11 1200.18 121.362 12
 -1 5 -11 1366.04 141.795 39
 -1 5 -12 1810.88 125.773 13
 -1 5 -12 1722.87 145.983 39
 -1 5 -12 1651.71 136.819 35
 -1 5 -12 1513.69 121.252 12
 1 -5 12 1899.79 156.803 17
 1 -5 12 1758.23 140.586 37
 1 -5 13 22.1381 40.7821 37
 -1 5 -13 -78.2256 32.3526 12
 1 -5 13 12.5706 48.0903 17
 -1 5 -13 -4.1932 33.0011 35
 1 -5 14 87.5796 20.8749 37
 1 -5 14 77.6958 24.7223 17
 -1 4 12 45.1492 21.6832 23
 -1 4 12 40.987 20.8779 21
 -1 4 11 179.212 43.3587 24
 1 -4 -11 195.774 56.2666 12
 -1 4 11 179.538 53.5706 23
 1 -4 -11 166.043 50.1094 35
 1 -4 -11 136.812 28.7447 39
 -1 4 11 221.846 44.7186 38
 -1 4 11 168.705 54.832 21
 -1 4 11 144.613 44.1774 14
 -1 4 10 122.223 47.5748 38
 -1 4 10 83.6874 62.2223 23
 -1 4 10 78.634 61.688 18
 1 -4 -10 31.396 52.5258 35
 -1 4 10 -12.9173 42.4061 24
 1 -4 -10 172.723 47.9429 39
 1 -4 -9 -9.82123 68.1664 35
 1 -4 -9 81.9893 45.0174 39
 -1 4 9 -2.51308 60.5444 18
 -1 4 9 -25.789 42.1249 38
 -1 4 9 110.34 47.9337 20
 -1 4 9 109.515 60.0872 24
 -1 4 9 -11.5484 61.362 23
 -1 4 9 85.6547 56.5728 33
 -1 4 8 4.55344 52.1549 33
 -1 4 8 -32.6191 41.8802 20
 1 -4 -8 -6.91834 79.7886 35
 1 -4 -8 11.6871 39.9761 39
 -1 4 8 -36.4546 48.1097 24
 -1 4 8 -102.262 65.6208 18
 -1 4 8 30.0003 55.0784 23
 -1 4 8 66.8786 40.1658 38
 1 -4 -7 -522.846 170.052 25
 -1 4 7 -293.804 141.865 2
 -1 4 7 199.898 57.1014 24
 -1 4 7 89.6827 62.9116 18
 1 -4 -7 76.1062 48.8878 39
 1 -4 -7 27.8236 109.615 28
 1 -4 -7 602.506 206.63 27
 -1 4 7 21.15 54.1975 33
 -1 4 7 -25.5886 41.6461 20
 -1 4 7 89.1927 38.4686 38
 -1 4 6 450.321 146.883 2
 1 -4 -6 237.202 165.519 28
 1 -4 -6 34.6099 56.1606 27
 1 -4 -6 140.027 102.483 25
 1 -4 -5 1334.3 241.764 27
 -1 4 5 1246.63 254.067 2
 1 -4 -5 1685.12 279.516 25
 1 -4 -5 1258.47 226.054 28
 1 -4 -4 4241.69 381.17 27
 1 -4 -4 4095.34 400.571 25
 1 -4 -4 4466.96 368.006 28
 -1 4 4 4156.24 396.971 2
 -1 4 4 4739.23 350.17 5
 -1 4 3 24766.6 868.144 2
 1 -4 -3 25112.3 759.789 28
 -1 4 3 25554 748.668 5
 1 -4 -3 24594.5 848.32 25
 1 -4 -3 25237.2 862.208 27
 -1 4 2 5296.66 304.819 30
 -1 4 2 4874.85 361.787 2
 -1 4 2 6021.92 344.522 5
 1 -4 -2 4775.89 357.058 27
 1 -4 -2 4610.01 338.27 25
 -1 4 2 5322.5 256.404 1
 1 -4 -2 5035.7 292.753 28
 -1 4 1 18285.4 470.085 1
 -1 4 1 17983.2 640.48 2
 -1 4 1 16845.6 543.813 5
 1 -4 -1 17106.3 615.95 27
 1 -4 -1 17426.7 588.167 25
 1 -4 -1 18236.1 453.292 28
 -1 4 1 16987.4 549.835 30
 -1 4 0 859.85 137.801 5
 1 -4 0 725.854 137.534 27
 -1 4 0 807.098 110.514 1
 -1 4 0 678.742 133.946 30
 1 -4 0 897.797 131.073 25
 -1 4 0 572.901 132.823 2
 1 -4 1 7057.29 374.57 29
 -1 4 -1 6769.73 257.698 6
 -1 4 -1 6672.92 355.329 4
 -1 4 -1 7018.82 373.714 2
 1 -4 1 6913.63 287.108 25
 1 -4 1 6528.54 342.94 27
 1 -4 2 7802 393.9 26
 1 -4 2 7825.35 406.182 29
 -1 4 -2 8397.26 307.286 6
 -1 4 -2 7726.17 388.57 3
 -1 4 -2 7879.08 405.337 2
 1 -4 2 8280.95 248.899 25
 1 -4 2 7780.32 365.501 27
 -1 4 -2 7975.67 406.381 4
 -1 4 -3 13.4279 14.0517 28
 1 -4 3 -44.9205 140.844 29
 -1 4 -3 55.6691 79.5449 3
 1 -4 3 90.9065 71.0148 27
 -1 4 -3 63.8718 102.913 4
 1 -4 3 85.1333 100.787 26
 -1 4 -3 51.5656 60.8386 6
 -1 4 -4 23404.6 796.682 4
 -1 4 -4 21694.6 474.355 28
 -1 4 -4 21170.1 638.147 6
 1 -4 4 23148.5 842.534 26
 1 -4 4 22088 654.149 27
 1 -4 4 23066.5 874.15 29
 -1 4 -4 21284.3 762.245 3
 -1 4 -5 3682.65 355.698 4
 1 -4 5 3943.91 431.126 29
 1 -4 5 3919.24 457.817 26
 -1 4 -5 4217.79 382.068 3
 -1 4 -5 4591.62 277.139 28
 1 -4 6 1269.15 285.783 29
 -1 4 -6 1196.26 229.127 4
 -1 4 -6 1379.73 233.208 3
 -1 4 -6 1241.15 179.23 28
 1 -4 6 907.796 331.028 26
 1 -4 7 6814.91 701.323 26
 -1 4 -7 7697.68 574.149 4
 -1 4 -7 7880.4 591.353 3
 1 -4 7 7718.47 660.523 29
 -1 4 -8 -32.1012 84.4318 4
 -1 4 -8 -25.8446 82.1098 3
 1 -4 8 261.483 252.089 26
 -1 4 -9 120.47 56.7926 35
 -1 4 -9 93.7737 56.3426 39
 1 -4 9 106.503 58.7793 24
 -1 4 -9 120.168 86.4625 4
 -1 4 -9 111.604 48.0331 12
 -1 4 -9 174.904 55.7811 13
 1 -4 9 46.494 52.0636 37
 1 -4 9 -184.163 236.746 26
 -1 4 -9 279.492 121.537 3
 1 -4 9 -265.012 121.543 29
 1 -4 9 31.2903 51.7515 38
 1 -4 10 3260.45 199.08 38
 -1 4 -10 3307.44 201.561 13
 1 -4 10 3268.14 203.018 24
 -1 4 -10 3131.9 203.744 12
 -1 4 -10 3238.39 212.215 39
 1 -4 10 3240.18 213.489 37
 -1 4 -10 3180.58 210.173 35
 1 -4 11 1766.13 147.852 24
 -1 4 -11 1876.13 163.666 39
 -1 4 -11 1687.37 144.459 12
 -1 4 -11 1996.1 146.927 13
 1 -4 11 2178.7 159.088 38
 1 -4 11 1944.26 164.982 37
 -1 4 -11 1699.36 156.299 35
 1 -4 12 2451.8 154.164 24
 1 -4 12 2682.16 155.184 38
 -1 4 -12 2560.92 167.268 35
 1 -4 12 2593.73 172.376 37
 -1 4 -12 2727.54 166.552 12
 -1 4 -12 2399.26 164.742 39
 -1 4 -13 616.082 75.0422 35
 1 -4 13 693.501 86.0546 17
 1 -4 13 537.574 54.3915 38
 1 -4 13 718.817 81.937 37
 -1 4 -13 687.311 70.8703 12
 1 -4 14 320.561 38.8638 17
 1 -4 14 357.533 40.9757 37
 1 -3 -12 62.5658 35.5078 35
 -1 3 12 55.0496 31.2996 24
 -1 3 12 59.0473 38.6058 23
 1 -3 -12 58.4387 22.2614 39
 1 -3 -12 78.0791 40.2735 12
 -1 3 12 31.2796 22.2225 14
 -1 3 12 71.8775 30.0023 38
 -1 3 12 63.6887 40.8761 21
 1 -3 -11 16.2399 29.8771 39
 -1 3 11 -50.8017 41.2645 38
 1 -3 -11 39.4481 48.719 35
 -1 3 11 23.2088 46.7183 24
 -1 3 11 22.9982 46.3434 23
 -1 3 10 52.3064 50.7465 24
 -1 3 10 -9.02635 55.6577 23
 -1 3 10 -3.5655 42.8305 38
 1 -3 -10 -70.5367 66.9957 35
 1 -3 -10 63.5383 61.3865 39
 -1 3 10 8.75298 61.1142 18
 -1 3 9 305.345 75.1135 24
 -1 3 9 359.506 73.9751 33
 1 -3 -9 276.726 80.9563 35
 1 -3 -9 441.134 88.9892 39
 -1 3 9 301.941 78.0347 18
 -1 3 9 276.554 76.7527 23
 -1 3 9 539.73 92.0087 38
 1 -3 -8 2616.35 370.856 27
 -1 3 8 1922.86 159.436 33
 -1 3 8 2075.51 172.546 23
 -1 3 8 2084.81 168.075 24
 -1 3 8 1906.49 165.923 18
 -1 3 8 1847.42 364.42 2
 1 -3 -8 1915.99 318.211 25
 1 -3 -8 1902.83 158.018 39
 1 -3 -8 1909.82 316.77 28
 1 -3 -8 1822.22 175.707 35
 -1 3 8 2107.61 165.106 38
 1 -3 -7 2191 312.82 27
 -1 3 7 2150.83 166.87 18
 1 -3 -7 2465.46 337.588 28
 1 -3 -7 2347.43 347.538 25
 -1 3 7 2039.28 333.307 2
 1 -3 -6 111.038 111.778 25
 -1 3 6 266.495 133.057 2
 1 -3 -6 181.483 86.4389 28
 1 -3 -6 150.387 86.3268 27
 1 -3 -5 1274.98 211.467 28
 1 -3 -5 600.086 141.951 27
 -1 3 5 791.881 141.896 5
 -1 3 5 967.382 204.537 2
 1 -3 -5 759.401 202.173 25
 1 -3 -4 2570.1 277.705 27
 1 -3 -4 2259 268.402 25
 -1 3 4 3360.78 262.978 5
 -1 3 4 2331.86 280.725 2
 -1 3 4 2900.08 221.053 1
 1 -3 -4 2379.26 251.85 28
 -1 3 3 1088.16 144.767 5
 1 -3 -3 1072.43 159.97 28
 1 -3 -3 1159.77 188.066 25
 -1 3 3 1137.42 128.828 1
 -1 3 3 1222.79 127.532 30
 1 -3 -3 1515.98 204.67 27
 -1 3 3 972.615 172.838 2
 1 -3 -2 44374.3 798.258 28
 1 -3 -2 46150.1 926.263 25
 1 -3 -2 46863.6 933.471 27
 -1 3 2 44413.2 753.671 30
 -1 3 2 45312 709.66 1
 -1 3 2 46487.7 953.667 2
 -1 3 1 3240.45 185.477 1
 -1 3 1 3442.4 243.941 2
 1 -3 -1 3592.19 246.644 27
 1 -3 -1 3378.89 182.316 28
 -1 3 1 3409.98 219.765 30
 1 -3 -1 2956.02 214.054 25
 -1 3 0 29578.5 639.846 30
 1 -3 0 28400.1 561.274 25
 -1 3 0 30194 569.309 1
 1 -3 0 28378.5 626.565 27
 -1 3 0 29761.2 653.822 2
 1 -3 1 4315.26 236.999 27
 1 -3 1 3914.29 177.169 25
 -1 3 -1 3870.39 251.212 30
 -1 3 -1 3985.24 241.625 2
 -1 3 -1 3833.03 243.408 4
 1 -3 1 3779.8 235.003 29
 -1 3 -1 3748.85 220.106 1
 -1 3 -1 3821.11 156.138 6
 1 -3 2 24060.6 313.962 25
 -1 3 -2 25081 641.765 4
 -1 3 -2 24860.3 331.112 28
 1 -3 2 24992.8 610.678 26
 -1 3 -2 24529.5 470.202 6
 1 -3 2 24139.7 571.193 27
 -1 3 -3 91600.7 911.758 28
 -1 3 -3 91601 1329.95 3
 -1 3 -3 91193.5 1326.69 4
 1 -3 3 95394.2 1405.14 26
 1 -3 3 87973.7 1159.53 27
 1 -3 3 93393.4 1466.75 29
 1 -3 4 27983.7 699.142 27
 1 -3 4 27873.1 957.016 29
 -1 3 -4 27965 823.212 3
 -1 3 -4 26933.8 623.706 28
 1 -3 4 28103.9 947.925 26
 -1 3 -4 29119.1 823.203 4
 -1 3 -5 27141.6 737.641 28
 -1 3 -5 27523.9 897.063 3
 1 -3 5 23559.2 1050.3 26
 -1 3 -5 26535.9 855.377 4
 1 -3 5 23740.5 970.136 29
 1 -3 6 172.163 217.753 26
 -1 3 -6 234.652 132.563 3
 -1 3 -6 424.224 112.343 28
 1 -3 6 291.426 191.844 29
 -1 3 -6 211.602 105.429 4
 1 -3 7 7634.56 681.204 26
 -1 3 -7 7202.34 545.571 3
 -1 3 -7 8104.81 523.141 28
 1 -3 7 7378.55 595.086 29
 -1 3 -7 8058.97 562.675 4
 1 -3 8 1269.64 308.95 26
 -1 3 -8 786.183 183.861 28
 -1 3 -8 579.459 138.297 4
 -1 3 -8 697.518 187.796 3
 1 -3 8 920.827 231.451 29
 -1 3 -9 589.722 180.82 28
 1 -3 9 274.791 58.3231 23
 -1 3 -9 235.495 64.1397 35
 -1 3 -9 187.594 65.4979 39
 1 -3 9 139.064 57.9815 24
 -1 3 -9 412.984 79.0982 12
 -1 3 -9 205.772 128.836 3
 1 -3 9 240.026 72.8195 37
 1 -3 9 634.513 180.153 29
 1 -3 9 272.627 80.5917 38
 1 -3 9 8.63588 209.418 26
 1 -3 10 1152.17 118.419 23
 1 -3 10 1407.66 137.973 38
 -1 3 -10 1350.13 139.944 39
 -1 3 -10 1426.54 141.427 12
 -1 3 -10 1424.09 143.776 35
 1 -3 10 1381.66 143.464 37
 1 -3 10 1355.85 139.17 24
 -1 3 -11 2302.1 174.34 35
 -1 3 -11 2373.15 179.43 39
 1 -3 11 2342.43 174.912 24
 1 -3 11 2295.03 177.532 37
 1 -3 11 2161.75 162.949 38
 -1 3 -11 2179.77 169.588 12
 -1 3 -12 1211.9 118.407 39
 1 -3 12 1157.02 113.91 24
 1 -3 12 1217.13 127.16 37
 1 -3 12 1102.56 109.684 38
 -1 3 -12 1312.31 120.58 12
 -1 3 -12 1028.59 111.006 35
 1 -3 13 125.167 35.5942 38
 -1 3 -13 123.063 41.9578 12
 1 -3 13 106.303 47.8207 17
 -1 3 -13 78.45 34.2046 35
 -1 3 -13 116.754 40.3858 39
 1 -3 13 83.7502 46.7296 37
 1 -3 13 119.829 38.2856 24
 -1 2 13 1295.27 76.5905 38
 -1 2 13 1168.32 69.5868 21
 -1 2 13 1369.62 80.4953 24
 1 -2 -13 1248.32 74.1303 12
 1 -2 -13 1222.04 74.3318 35
 1 -2 -12 17.6099 30.4295 39
 -1 2 12 42.3546 32.7266 14
 -1 2 12 -50.1544 43.6816 38
 -1 2 12 15.3657 35.8743 23
 1 -2 -12 -20.4581 41.8163 12
 1 -2 -12 -26.2164 39.6193 35
 -1 2 12 -8.73497 38.5941 24
 -1 2 11 269.492 52.7773 37
 -1 2 11 180.407 69.0561 24
 1 -2 -11 198.618 79.6159 35
 -1 2 11 294.157 72.2399 38
 1 -2 -11 249.315 67.663 39
 -1 2 11 256.219 73.7759 23
 1 -2 -10 490.959 90.8853 39
 -1 2 10 551.112 104.839 23
 -1 2 10 579.847 104.225 18
 1 -2 -10 418.1 99.2404 35
 -1 2 10 601.277 101.99 24
 -1 2 10 602.414 97.4458 38
 -1 2 10 706.801 96.3475 37
 -1 2 9 2845.45 403.281 2
 -1 2 9 2988.98 191.624 33
 -1 2 9 2949.67 205.529 23
 1 -2 -9 2957.54 198.029 39
 -1 2 9 3048.59 194.964 37
 -1 2 9 2966.82 211.143 18
 1 -2 -9 2777.97 208.069 35
 -1 2 9 2823.95 194.939 38
 -1 2 9 2896.67 199.839 24
 1 -2 -8 5134.19 507.288 28
 -1 2 8 5484.91 259.976 24
 -1 2 8 5379.16 546.799 2
 -1 2 8 5475.96 251.921 33
 -1 2 8 5936.3 279.033 18
 1 -2 -8 5589.46 260.293 39
 1 -2 -8 5754.44 524.094 25
 -1 2 8 5464.45 258.093 38
 -1 2 8 5359.93 261.223 23
 1 -2 -8 5858.3 285.926 35
 -1 2 7 4784.94 470.581 26
 -1 2 7 4684.52 465.037 2
 1 -2 -7 5189.81 477.231 28
 1 -2 -7 4447.84 440.985 25
 1 -2 -7 5301.43 449.51 27
 -1 2 6 7216.79 521.82 2
 -1 2 6 7324.62 527.262 26
 1 -2 -6 6822.37 495.807 28
 -1 2 6 7427.36 445.175 5
 -1 2 6 6727.44 414.629 1
 1 -2 -6 6676.45 488.215 25
 -1 2 5 16994.3 592.353 1
 -1 2 5 16722 704.987 2
 -1 2 5 17746.8 728.769 26
 1 -2 -5 16963.2 691.314 25
 1 -2 -5 16521.1 693.213 28
 -1 2 5 16925.9 590.641 5
 1 -2 -4 86708.5 1396.3 28
 -1 2 4 87383.9 1423.81 26
 -1 2 4 89110.6 974.573 30
 -1 2 4 87730.5 1164.22 5
 1 -2 -4 87083.4 1404.35 25
 -1 2 4 85194.3 1179.9 1
 -1 2 4 87778.3 1441.84 2
 1 -2 -3 14120.6 508.82 25
 -1 2 3 14582.3 522.663 2
 -1 2 3 14892.7 394.113 30
 -1 2 3 14680.1 516.327 26
 -1 2 3 14414.9 427.888 1
 1 -2 -3 14375.9 494.499 28
 1 -2 -2 69368.7 968.248 27
 1 -2 -2 68866.8 913.23 28
 -1 2 2 71213.7 1007.07 2
 -1 2 2 69168.4 765.589 5
 -1 2 2 70287.3 833.822 1
 -1 2 2 68526 814.018 30
 1 -2 -2 69590.2 986.569 25
 -1 2 1 1564.9 129.825 30
 1 -2 -1 1149.93 126.29 27
 -1 2 1 1571.38 119.457 1
 -1 2 1 1620.33 139.622 2
 1 -2 -1 1503.04 133.278 25
 1 -2 -1 1528.69 112.942 28
 -1 2 1 1437.73 101.454 5
 1 -2 0 28758.3 471.543 25
 1 -2 0 29356.3 519.62 27
 -1 2 0 30191.3 536.296 30
 -1 2 0 29426.3 496.43 1
 -1 2 0 30398.1 537.968 2
 1 -2 0 30936.7 520.632 29
 -1 2 -1 67821.5 841.574 30
 1 -2 1 68679.2 787.459 26
 1 -2 1 70473.7 602.359 25
 -1 2 -1 68157 820.018 1
 1 -2 1 68808.3 813.163 27
 -1 2 -1 71303.7 831.144 2
 -1 2 -1 68592.7 862.467 4
 1 -2 1 71293.2 851.76 29
 -1 2 -2 30610.7 638.642 4
 1 -2 2 32629.1 608.344 27
 1 -2 2 32170.1 674.175 26
 1 -2 2 31462.3 728.08 29
 -1 2 -2 31037.8 492.762 28
 -1 2 -3 2040.67 188.478 4
 1 -2 3 2018.03 173.974 27
 -1 2 -3 1866.76 157.776 28
 -1 2 -3 2033.2 198.2 3
 1 -2 3 2022.12 254.379 29
 1 -2 3 1990.83 257.397 26
 -1 2 -3 1952.76 105.746 25
 -1 2 -4 13801.8 529.299 4
 -1 2 -4 13732.5 545.288 3
 -1 2 -4 13577.5 487.188 28
 -1 2 -4 13922.1 339.22 25
 1 -2 4 13264.9 694.405 26
 1 -2 4 13253.2 631.764 29
 1 -2 5 53769.2 1330.09 29
 1 -2 5 48901.2 1434.04 26
 -1 2 -5 52599.4 1171.82 3
 -1 2 -5 53345.5 1154.69 4
 -1 2 -5 50965.6 1082.19 28
 -1 2 -5 51834.3 760.625 25
 1 -2 6 383.639 219.51 26
 -1 2 -6 289.086 131.01 3
 1 -2 6 379.092 179.166 29
 -1 2 -6 295.913 127.098 4
 -1 2 -6 445.075 121.917 28
 -1 2 -7 13475.1 706.875 28
 1 -2 7 14619.2 857.667 26
 -1 2 -7 13736 726.888 3
 -1 2 -7 13917 698.485 4
 1 -2 7 13580.6 747.888 29
 -1 2 -8 -54.1305 61.2522 3
 1 -2 8 396.371 168.3 26
 -1 2 -8 -65.7649 56.6149 28
 1 -2 8 348.338 144.495 29
 1 -2 8 69.8789 104.947 2
 1 -2 9 1104 253.899 2
 -1 2 -9 1275.75 263.958 28
 -1 2 -9 1576.07 147.174 39
 1 -2 9 1401.55 141.07 24
 -1 2 -9 1568.46 145.766 12
 -1 2 -9 1550.14 144.891 35
 1 -2 9 1473.3 138.169 38
 1 -2 9 1324.49 131.665 23
 -1 2 -9 1184.51 239.301 3
 1 -2 9 1647.68 310.104 26
 1 -2 9 1362.7 136.603 37
 1 -2 10 930.3 121.542 37
 -1 2 -10 1002.98 123.557 39
 1 -2 10 873.771 112.45 38
 1 -2 10 851.289 116.72 24
 -1 2 -10 954.008 123.077 35
 1 -2 10 765.352 110.044 23
 -1 2 -10 743.104 107.064 12
 1 -2 11 73.3865 55.71 37
 1 -2 11 37.1237 55.0266 24
 1 -2 11 112.172 60.6908 23
 1 -2 11 61.2354 45.9693 38
 -1 2 -11 30.312 46.2769 12
 -1 2 -11 -34.3234 56.2693 35
 -1 2 -11 135.35 61.7176 39
 -1 2 -12 -24.2123 38.0259 39
 -1 2 -12 -40.4423 47.6497 35
 1 -2 12 32.4664 49.3384 37
 1 -2 12 29.6887 42.4825 24
 -1 2 -12 1.62359 50.5893 12
 1 -2 12 -58.4132 46.064 38
 1 -2 13 173.307 45.8128 24
 -1 2 -13 125.04 39.0705 12
 1 -2 13 215.948 50.8278 37
 1 -2 13 177.506 45.2313 38
 -1 2 -13 196.394 41.742 35
 1 -2 13 250.046 47.9298 17
 -1 2 -13 182.064 41.7324 39
 -1 1 13 1504.96 104.199 38
 1 -1 -13 1335.51 90.8359 39
 -1 1 13 1261.83 79.8067 23
 -1 1 13 1623.62 108.518 24
 1 -1 -13 1410.38 98.4926 35
 1 -1 -13 1284.05 89.2758 12
 -1 1 13 1160.98 71.8769 37
 -1 1 12 51.2225 52.9491 38
 -1 1 12 29.302 51.1587 24
 -1 1 12 73.3889 38.7246 23
 1 -1 -12 69.311 45.1453 12
 1 -1 -12 50.2054 52.871 35
 -1 1 12 2.08875 33.8318 37
 1 -1 -12 24.1966 42.2217 39
 -1 1 11 102.74 51.6059 37
 1 -1 -11 125.069 69.3154 35
 1 -1 -11 45.3781 55.609 39
 -1 1 11 151.991 67.8211 38
 -1 1 11 120.564 58.0713 23
 -1 1 11 148.666 70.8492 24
 1 -1 -10 2278.51 180.43 39
 1 -1 -10 2395.89 184.43 35
 -1 1 10 2358.86 183.012 38
 -1 1 10 2121.5 175.663 18
 -1 1 10 2334.37 179.134 23
 -1 1 10 2216.91 176.581 24
 -1 1 10 2303.86 174.335 37
 1 -1 -9 1220.5 138.999 35
 -1 1 9 1302.61 139.014 23
 -1 1 9 1356.19 134.375 37
 -1 1 9 1285.29 130.473 24
 -1 1 9 1605.32 345.164 2
 -1 1 9 1147.63 130.104 38
 -1 1 9 1188.08 277.764 26
 1 -1 -9 1745.23 305.981 28
 -1 1 9 1371.33 143.695 18
 1 -1 -9 1302.29 136.905 39
 -1 1 8 1452.32 277.751 26
 -1 1 8 995.049 212.208 2
 1 -1 -8 1402.21 250.473 25
 1 -1 -8 1131.15 234.15 28
 1 -1 -7 19350.9 816.101 25
 -1 1 7 17929.6 763.192 1
 -1 1 7 19504.7 753.611 5
 -1 1 7 18484.8 865.028 26
 1 -1 -7 19670.9 803.655 3
 -1 1 7 17166.3 835.422 2
 1 -1 -7 17690.9 840.071 28
 -1 1 6 7418.12 447.955 1
 1 -1 -6 7126.19 441.552 3
 -1 1 6 7342.97 504.926 26
 1 -1 -6 7764.53 472.981 25
 1 -1 -6 7889.1 512.692 28
 -1 1 6 7898.57 510.515 2
 -1 1 5 2796.1 203.354 30
 1 -1 -5 2251.73 235.273 25
 1 -1 -5 2640.1 239.615 3
 -1 1 5 2793.3 248.48 1
 1 -1 -5 2315.88 262.263 28
 -1 1 5 2297.19 264.172 26
 -1 1 5 2377.25 259.308 2
 -1 1 4 140089 1528.5 1
 -1 1 4 136544 1611.08 2
 -1 1 4 145823 1705.96 26
 1 -1 -4 139980 1589.22 25
 1 -1 -4 140830 1514.42 3
 1 -1 -4 142111 1676.96 28
 -1 1 4 141743 1327.69 30
 -1 1 3 445.506 85.3731 30
 1 -1 -3 395.266 100.189 28
 -1 1 3 320.766 90.2766 2
 -1 1 3 271.2 96.2109 26
 1 -1 -3 377.917 100.202 25
 -1 1 3 368.561 82.6586 1
 1 -1 -3 308.97 79.0497 3
 -1 1 2 269804 1533.84 30
 1 -1 -2 272604 1679.15 25
 1 -1 -2 270872 1571.59 3
 -1 1 2 274091 1603.95 26
 -1 1 2 273390 1089.92 5
 1 -1 -2 273321 1523.25 27
 1 -1 -2 272427 1654.64 28
 -1 1 2 277477 1607.34 2
 -1 1 1 6916.58 202.58 2
 1 -1 -1 6717.36 206.758 28
 -1 1 1 6594.68 212.232 1
 -1 1 1 6518.74 219.579 30
 1 -1 -1 6541.74 203.626 27
 1 -1 -1 6757.93 224.754 25
 -1 1 0 21421.2 318.728 2
 1 -1 0 20405.4 329.54 25
 -1 1 0 19895.6 347.244 1
 1 -1 0 20943.6 354.869 27
 1 -1 0 21379.4 315.053 29
 -1 1 0 20254.3 352.606 30
 1 -1 1 61863.8 692.165 27
 1 -1 1 63178.4 707.831 26
 1 -1 1 60437.2 797.175 29
 -1 1 -1 59624.1 621.461 28
 -1 1 -1 58373 666.141 4
 -1 1 -1 57592 605.228 30
 -1 1 -1 58908.8 664.913 1
 -1 1 -2 97119.3 1002.17 28
 -1 1 -2 97223.6 1049.42 3
 1 -1 2 92822.3 1262.56 29
 1 -1 2 91532.1 1258.19 26
 -1 1 -2 94084.4 1006.77 4
 -1 1 -3 848.369 103.388 25
 1 -1 3 826.137 84.9397 31
 -1 1 -3 798.692 127.017 3
 -1 1 -3 1134.21 140.688 28
 -1 1 -3 850.496 114.091 4
 1 -1 3 845.442 173.022 29
 1 -1 3 932.295 197.278 26
 -1 1 -4 4671.34 293.088 4
 1 -1 4 5258.74 378.572 29
 1 -1 4 4472.77 384.936 26
 -1 1 -4 4685.55 308.901 3
 -1 1 -4 5080.98 273.316 25
 -1 1 -4 4702.81 313.887 28
 -1 1 -5 46391.5 911.584 25
 1 -1 5 46937.4 1257.65 26
 -1 1 -5 44829.3 1074.78 28
 1 -1 5 45061.8 1130.14 29
 -1 1 -5 43673.7 973.49 4
 -1 1 -5 43659.9 1036.51 3
 -1 1 -6 1017.01 198.624 28
 -1 1 -6 1109.14 190.398 3
 -1 1 -6 951.85 156.849 25
 1 -1 6 1006.49 210.671 29
 -1 1 -6 996.213 169.099 4
 1 -1 6 907.448 227.999 26
 1 -1 7 8005.86 568.688 29
 -1 1 -7 8271.73 581.076 28
 1 -1 7 7400.86 563.375 2
 -1 1 -7 8560.57 548.646 3
 1 -1 7 7877.53 601.485 26
 -1 1 -8 3756.35 422.502 28
 1 -1 8 3517.79 431.055 2
 1 -1 8 4087.53 223.34 24
 1 -1 8 3574.93 445.554 26
 1 -1 8 4091.43 222.517 37
 1 -1 8 4451.71 231.297 38
 -1 1 -8 4161.26 419.44 3
 -1 1 -9 402.362 158.351 28
 1 -1 9 206.001 110.258 2
 1 -1 9 709.172 193.485 26
 1 -1 9 358.282 79.5118 24
 1 -1 9 323.42 72.0659 37
 1 -1 9 349.215 83.1539 23
 1 -1 9 250.614 126.238 5
 -1 1 -9 232.727 69.7018 35
 -1 1 -9 386.052 84.815 39
 -1 1 -9 379.457 83.5288 12
 1 -1 9 316.355 75.1032 38
 -1 1 -10 12.4472 56.3699 39
 -1 1 -10 14.9589 40.7414 12
 1 -1 10 62.7674 47.7142 37
 1 -1 10 -55.5167 53.7771 38
 -1 1 -10 -1.47607 54.5612 35
 1 -1 10 43.1572 46.6104 23
 1 -1 10 17.3943 58.5509 24
 1 -1 11 2908.48 188.201 23
 -1 1 -11 2826.41 180.395 39
 1 -1 11 2754.02 190.197 24
 1 -1 11 2955.32 190.523 38
 1 -1 11 2763.14 182.915 37
 -1 1 -11 2821.07 187.317 12
 -1 1 -11 2690.27 181.573 35
 1 -1 12 42.6645 44.6979 38
 1 -1 12 -27.9187 50.1822 24
 1 -1 12 -5.66624 41.2694 37
 -1 1 -12 12.3889 35.1069 35
 1 -1 12 -18.3047 37.2751 23
 -1 1 -12 -62.2114 34.7974 39
 -1 1 -12 85.9967 51.991 12
 1 -1 13 144.235 38.8278 38
 -1 1 -13 105.171 26.2385 35
 1 -1 13 135.588 34.7378 37
 1 -1 13 98.7813 37.0444 24
 -1 1 -13 151.015 38.8306 12
 -1 0 14 200.402 31.4194 24
 -1 0 14 221.182 33.0843 38
 1 0 -14 239.954 33.4283 35
 -1 0 13 992.673 93.694 38
 -1 0 13 1183.24 96.573 37
 1 0 -13 991.547 93.0062 39
 -1 0 13 986.23 94.5708 24
 1 0 -13 1016.47 96.4807 35
 1 0 -13 1087.41 91.1457 12
 1 0 -12 392.365 77.136 39
 -1 0 12 512.348 79.332 23
 1 0 -12 467.838 93.7004 35
 -1 0 12 561.449 93.3144 38
 1 0 -12 505.965 80.0441 12
 -1 0 12 475.027 83.8464 37
 -1 0 12 500.432 91.0277 24
 -1 0 11 478.1 95.7789 38
 1 0 -11 519.772 85.8903 12
 1 0 -11 596.74 104.732 35
 -1 0 11 520.322 99.7783 24
 -1 0 11 591.665 96.3985 37
 -1 0 11 545.748 92.3157 23
 1 0 -11 708.133 109.347 39
 -1 0 10 712.43 110.767 24
 1 0 -10 780.114 114.727 39
 -1 0 10 661.305 109.739 38
 -1 0 10 705.388 100.239 23
 1 0 -10 621.519 108.389 35
 -1 0 10 620.62 99.7145 37
 -1 0 9 15679.3 908.174 2
 -1 0 9 15931 845.589 1
 -1 0 9 16074.2 444.016 38
 1 0 -9 15341.9 442.441 10
 -1 0 9 15457.8 434.844 37
 -1 0 9 15925.1 429.935 23
 1 0 -9 15427.8 897.002 28
 1 0 -9 16382.1 450.831 39
 -1 0 9 15607.4 436.714 18
 1 0 -9 17142.2 876.696 3
 -1 0 9 16687.1 455.119 24
 -1 0 9 16302.8 925.466 26
 1 0 -9 15578.9 445.691 35
 1 0 -8 679.26 185.676 28
 -1 0 8 266.12 136.147 2
 -1 0 8 303.26 184.616 26
 -1 0 8 452.763 133.578 1
 1 0 -8 443.937 135.142 3
 1 0 -7 -81.8449 48.9268 25
 -1 0 7 105.033 116.257 26
 1 0 -7 -137.41 100.05 3
 1 0 -7 189.167 111.946 28
 -1 0 7 -63.5912 117.227 2
 1 0 -6 3852.43 333.033 3
 1 0 -6 3986.4 346.32 28
 1 0 -6 4282.53 320.999 25
 -1 0 6 4162.82 281.163 30
 -1 0 6 3720.81 374.985 26
 -1 0 6 3844.05 305.095 29
 -1 0 6 3850.36 345.834 2
 -1 0 5 1624.14 247.066 26
 -1 0 5 1698.5 173.943 30
 1 0 -5 1800.19 203.726 3
 -1 0 5 1494.61 193.934 2
 1 0 -5 1881.89 192.227 25
 -1 0 5 1367.35 169.046 29
 1 0 -5 1732.64 222.358 28
 -1 0 4 101939 1160.39 30
 1 0 -4 101644 1312.18 3
 1 0 -4 100487 1171.31 25
 -1 0 4 102997 1181.34 29
 1 0 -3 47249.2 507.461 31
 -1 0 3 45590.4 902.41 26
 1 0 -3 45985.8 760.085 3
 1 0 -3 44982.6 676.354 25
 -1 0 3 45840.9 693.719 30
 -1 0 3 47237.9 658.138 29
 1 0 -3 45960.6 768.499 28
 -1 0 2 2628.77 153.954 30
 1 0 -2 2796.62 103.425 27
 1 0 -2 2810.4 160.795 28
 1 0 -2 2671.71 160.321 3
 1 0 -2 2988.55 135.081 31
 1 0 -2 2671.52 143.555 25
 -1 0 2 2345.69 175.634 26
 -1 0 2 2741.28 115.699 29
 1 0 -1 12915.5 182.925 27
 1 0 -1 13654.3 284.901 3
 -1 0 1 13017.1 270.641 1
 1 0 -1 13397.3 273.716 25
 -1 0 1 13585.7 235.395 26
 1 0 -1 14258.1 295.705 31
 -1 0 1 12737.1 282.843 30
 1 0 -1 13413.3 202.634 5
 -1 0 0 10833.9 228.528 30
 -1 0 0 11206.5 213.341 1
 1 0 0 10935 259.855 31
 1 0 0 10718.4 215.126 29
 -1 0 -1 222528 1079 1
 -1 0 -1 224133 840.657 30
 1 0 1 231277 1443.53 29
 1 0 1 229179 1148.35 31
 -1 0 -1 225540 1394.63 28
 -1 0 -2 3896.77 228.526 28
 1 0 2 3704.86 242.707 29
 1 0 2 4114.22 252.032 26
 -1 0 -2 4229.45 178.963 4
 -1 0 -2 3884.33 191.708 3
 1 0 2 4334.54 156.046 31
 -1 0 -3 44516.8 759.934 3
 -1 0 -3 45827.1 886.012 28
 -1 0 -3 44669.7 707.559 4
 -1 0 -3 46006.7 836.76 25
 1 0 3 47499.4 927.262 29
 -1 0 -4 21039.8 572.029 4
 -1 0 -4 21918.5 651.572 25
 -1 0 -4 21247.7 600.809 3
 1 0 4 23720.3 768.992 26
 1 0 4 21949.8 723.721 29
 -1 0 -4 21755.1 706.113 28
 -1 0 -5 -76.6473 94.2854 28
 1 0 5 -30.3397 109.923 26
 1 0 5 118.525 122.655 2
 -1 0 -5 64.5211 70.1021 25
 -1 0 -5 194.563 79.2559 3
 1 0 5 111.151 125.207 29
 1 0 6 -2.65017 121.878 2
 -1 0 -6 223.844 86.1813 3
 1 0 6 369.769 175.101 26
 -1 0 -6 208.6 128.066 28
 -1 0 -6 163.699 92.1884 25
 1 0 7 275.137 138.995 2
 -1 0 -7 298.936 105.331 25
 1 0 8 206.011 64.4081 18
 -1 0 -8 228.284 70.8351 35
 1 0 8 54.741 134.088 26
 -1 0 -8 158.203 133.555 28
 1 0 8 183.241 62.9564 38
 1 0 8 195.725 143.997 2
 1 0 8 127.883 47.3256 37
 1 0 8 229.714 72.1616 23
 1 0 8 254.57 62.6993 24
 1 0 8 -118.337 85.3514 5
 -1 0 -8 89.6904 43.7656 39
 1 0 9 7533.04 318.369 38
 1 0 9 8213.31 331.357 24
 1 0 9 7801.76 318.468 37
 1 0 9 7924.1 333.032 23
 -1 0 -9 8335.3 319.151 39
 -1 0 -9 8093.03 318.234 35
 -1 0 -10 2185.75 166.592 39
 1 0 10 2266.97 177.487 24
 1 0 10 2328.74 179.184 38
 -1 0 -10 2002.17 160.55 35
 -1 0 -10 1943.41 163.974 12
 1 0 10 1990.14 172.266 23
 1 0 10 2205.89 168.493 37
 -1 0 -11 -25.5082 38.7969 35
 1 0 11 73.3564 57.1908 24
 1 0 11 -16.4892 39.5634 37
 1 0 11 23.0967 52.1094 23
 -1 0 -11 -29.0501 57.4939 12
 -1 0 -11 -113.837 42.2627 34
 -1 0 -11 104.511 42.421 39
 1 0 11 53.6128 62.4789 38
 1 0 12 -13.5176 46.6156 24
 1 0 12 45.8978 33.3956 23
 1 0 12 -13.9481 26.8524 37
 1 0 12 22.9363 41.5854 38
 -1 0 -12 16.4635 22.3747 39
 -1 0 -12 61.1686 30.9203 35
 -1 0 -12 37.6485 48.8799 12
 -1 0 -13 9.24106 19.7558 12
 1 0 13 -8.94465 22.0402 38
 -1 -1 14 130.428 34.2385 37
 1 1 -14 147.012 35.1731 39
 -1 -1 14 131.412 33.0016 38
 1 1 -14 153.706 38.6554 35
 -1 -1 14 118.827 33.1105 24
 1 1 -13 1377.26 115.163 39
 -1 -1 13 1443.55 118.942 37
 -1 -1 13 1219.28 110.535 24
 -1 -1 13 1337.86 113.828 38
 1 1 -13 1288.84 100.674 12
 1 1 -13 1358.99 118.185 35
 -1 -1 12 394.255 86.1576 24
 -1 -1 12 434.083 85.9718 37
 -1 -1 12 581.97 99.336 38
 1 1 -12 395.847 87.7472 39
 1 1 -12 502.782 81.882 12
 1 1 -12 385.133 86.476 35
 -1 -1 11 2103.99 175.272 24
 1 1 -11 2290.18 170.832 12
 -1 -1 11 2072.31 171.283 37
 1 1 -11 1976.48 169.169 39
 -1 -1 11 2153.11 171.552 38
 1 1 -11 2115.08 173.231 35
 -1 -1 10 14943.6 911.087 2
 1 1 -10 15876.1 923.733 3
 -1 -1 10 15279.9 937.46 26
 1 1 -10 15595.4 461.098 10
 -1 -1 10 15669.9 454.801 24
 1 1 -10 16490.8 432.341 13
 1 1 -10 15401.3 447.826 39
 -1 -1 10 15197.4 877.937 1
 1 1 -10 15247.6 441 35
 -1 -1 10 15296.3 441.467 38
 -1 -1 10 14783 440.333 37
 1 1 -10 14887.3 897.518 28
 -1 -1 9 -58.6992 94.9033 1
 -1 -1 9 61.2017 49.616 38
 1 1 -9 142.44 50.6286 35
 -1 -1 9 30.6463 40.5732 24
 1 1 -9 23.2563 39.5935 39
 1 1 -9 3.95382 40.6114 10
 -1 -1 9 113.911 103.766 2
 1 1 -9 -8.02075 78.0077 3
 -1 -1 9 116.313 48.9489 37
 1 1 -9 -83.6962 72.0843 28
 -1 -1 8 6687.2 578.71 26
 1 1 -8 6500.11 521.323 28
 1 1 -8 6471.71 519.14 3
 -1 -1 8 7050.07 500.524 29
 -1 -1 8 6213.85 510.154 2
 1 1 -7 7439.18 509.593 3
 -1 -1 7 8575.73 457.534 30
 -1 -1 7 8013.94 596.876 26
 1 1 -7 7913.09 523.396 28
 -1 -1 7 8703.33 510.565 29
 -1 -1 7 7496.35 519 2
 -1 -1 6 3798.38 417.524 26
 1 1 -6 4103.06 349.395 3
 -1 -1 6 4184.95 306.346 30
 1 1 -6 3720.73 324.514 28
 1 1 -6 4375.25 275.539 25
 -1 -1 6 4462.4 332.593 29
 1 1 -5 8098.05 331.482 25
 1 1 -5 7309.28 392.573 28
 1 1 -5 7596.35 419.789 3
 -1 -1 5 6813.3 504.334 26
 1 1 -5 7982.06 429.226 4
 -1 -1 5 8481.33 418.289 29
 1 1 -4 113431 1313.41 28
 1 1 -4 109989 1401.11 3
 1 1 -4 110440 1047.2 25
 1 1 -4 111425 1393.46 4
 -1 -1 4 108199 1368.84 29
 -1 -1 3 2065.01 216.121 26
 1 1 -3 2342.7 134.001 25
 1 1 -3 2222.47 166.226 28
 1 1 -3 2305.83 187.503 4
 -1 -1 3 2234.78 174.833 29
 1 1 -3 2294.68 187.339 3
 1 1 -2 243766 1514.11 4
 1 1 -2 244585 1529.4 3
 -1 -1 2 248075 1479.75 26
 1 1 -1 122734 810.555 4
 1 1 -1 122907 729.55 2
 1 1 -1 123353 842.405 3
 1 1 -1 120738 1016.94 31
 -1 -1 0 19216.8 212.264 1
 1 1 0 20358.5 376.989 2
 1 1 0 19894.9 418.174 31
 -1 -1 -1 50253.3 750.117 28
 -1 -1 -1 50065.5 392.569 3
 1 1 1 51009.2 739.757 2
 -1 -1 -2 10153.3 395.44 28
 1 1 2 10294.9 402.269 26
 1 1 2 9967.14 398.982 5
 -1 -1 -2 10283.7 255.692 3
 1 1 2 10521.7 405.686 2
 1 1 3 1024.77 173.741 5
 -1 -1 -3 1219.31 177.08 25
 -1 -1 -3 1001.52 102.874 3
 1 1 3 1263.68 194.498 26
 -1 -1 -3 1036.59 173.943 28
 1 1 3 874.778 154.328 2
 1 1 4 9345.46 506.467 26
 -1 -1 -4 9638.94 370.969 3
 -1 -1 -4 8686.33 474.511 28
 1 1 4 8670.3 475.531 5
 -1 -1 -4 9279.22 484.653 25
 1 1 4 9296.97 510.586 2
 1 1 5 23884.8 869.33 5
 1 1 5 25165.2 925.361 2
 -1 -1 -5 24527.7 900.138 28
 1 1 5 24116.5 894.754 26
 -1 -1 -5 24550.1 853.344 25
 -1 -1 -5 25809.6 699.893 3
 1 1 6 -106.061 112.828 5
 1 1 6 31.3035 118.171 2
 -1 -1 -6 108.443 85.3258 25
 -1 -1 -6 -36.819 131.083 28
 1 1 6 -141.736 135.337 26
 1 1 7 4553.02 471.642 26
 -1 -1 -7 4891.64 488.435 28
 -1 -1 -7 5447.22 484.317 25
 1 1 7 4638.09 503.447 2
 1 1 7 4737.92 466.762 5
 1 1 8 25225.2 587.384 18
 -1 -1 -8 26539.7 572.596 35
 -1 -1 -8 26142.7 546.791 39
 1 1 8 25437.7 573.785 38
 1 1 8 26587.3 1145.15 5
 1 1 8 25802.6 584.703 23
 -1 -1 -8 26846.7 1199.34 28
 1 1 8 25904.1 550.957 20
 1 1 8 26312.4 564.666 37
 1 1 8 26436.1 1213.21 2
 1 1 8 24738.6 561.224 24
 1 1 9 1895.11 166.063 38
 1 1 9 1808.23 161.801 24
 1 1 9 1839.82 163.618 23
 1 1 9 1990.39 156.683 20
 1 1 9 2040.9 162.775 37
 -1 -1 -9 2030.78 164.849 35
 -1 -1 -9 1931.81 155.073 39
 1 1 10 -41.3942 52.8989 38
 -1 -1 -10 55.2023 54.1189 35
 1 1 10 -22.3239 60.8802 23
 1 1 10 17.698 49.2658 24
 -1 -1 -10 12.9419 54.1821 12
 1 1 10 42.8568 35.7277 37
 -1 -1 -10 -16.7865 37.7233 39
 1 1 10 -52.1901 41.0848 14
 1 1 11 279.783 59.864 21
 -1 -1 -11 303.358 77.2882 12
 1 1 11 259.809 69.5725 38
 1 1 11 286.725 70.7382 24
 -1 -1 -11 322.749 56.2931 34
 1 1 11 268.719 68.4972 23
 -1 -1 -11 139.889 49.3133 35
 -1 -1 -11 239.609 51.042 39
 1 1 11 224.126 51.4592 37
 1 1 12 278.88 56.3214 24
 -1 -1 -12 331.914 56.8598 12
 1 1 12 238.048 50.5564 38
 1 1 12 215.951 49.9952 23
 -1 -1 -12 221.286 36.7488 35
 -1 -2 14 337.317 48.9305 38
 1 2 -14 301.861 52.6026 39
 -1 -2 14 278.711 42.7927 24
 1 2 -14 272.725 51.2231 35
 -1 -2 14 342.267 56.2819 37
 -1 -2 13 0.83673 37.255 24
 1 2 -13 4.39505 21.8048 12
 -1 -2 13 4.23398 41.0969 38
 1 2 -13 21.9952 48.0867 35
 -1 -2 13 17.6025 53.7483 37
 1 2 -13 5.21886 47.5197 39
 1 2 -12 171.317 78.1285 35
 -1 -2 12 119.666 71.6236 24
 1 2 -12 213.712 56.6303 13
 -1 -2 12 244.591 76.2966 38
 1 2 -12 256.949 60.7507 12
 -1 -2 12 268.992 81.8031 37
 1 2 -12 225.189 79.173 39
 1 2 -11 1750.65 146.305 12
 1 2 -11 2071.71 158.49 13
 1 2 -11 1670.96 156.092 35
 -1 -2 11 1734.66 156.65 24
 -1 -2 11 1710.23 158.865 37
 -1 -2 11 1693.43 154.685 38
 1 2 -11 1771.09 162.458 39
 -1 -2 10 630.537 100.83 37
 -1 -2 10 416.409 169.592 1
 -1 -2 10 716.536 105.731 24
 -1 -2 10 548.003 169.492 2
 1 2 -10 767.66 94.5926 12
 1 2 -10 636.34 92.4379 13
 1 2 -10 498.437 178.427 3
 1 2 -10 625.008 177.246 28
 1 2 -10 725.015 104.829 35
 1 2 -10 838.459 115.903 10
 1 2 -10 685.693 105.904 39
 -1 -2 10 572.11 99.1594 38
 -1 -2 10 798.278 229.822 26
 -1 -2 9 9107.58 324.337 38
 1 2 -9 8807.66 662.988 3
 1 2 -9 9146.42 339.093 10
 -1 -2 9 8915.58 323.382 24
 1 2 -9 8452.66 314.635 35
 1 2 -9 8912 325.724 39
 -1 -2 9 8669.22 697.345 26
 -1 -2 9 8088.13 618.802 2
 -1 -2 9 9072.55 328.617 37
 1 2 -9 8809.06 627.189 28
 -1 -2 8 8539.79 552.292 29
 1 2 -8 7804.46 537.158 28
 -1 -2 8 7570.16 643.521 26
 -1 -2 7 -131.537 96.3139 30
 -1 -2 7 -340.945 231.467 26
 1 2 -7 -78.7371 80.9011 28
 1 2 -7 -142.145 117.547 3
 -1 -2 7 -456.382 168.196 29
 1 2 -6 70150.9 1439.93 3
 1 2 -6 70460.9 1315.35 28
 -1 -2 6 73765.5 1474.68 29
 1 2 -6 72371.1 1460.15 4
 -1 -2 5 79.9426 180.748 26
 -1 -2 5 97.469 85.2076 29
 1 2 -5 -15.2551 84.7116 4
 1 2 -5 -4.98063 38.61 25
 1 2 -5 -62.8391 81.858 3
 1 2 -5 11.5634 61.0747 28
 -1 -2 4 10214.8 449.703 29
 -1 -2 4 10070.1 509.141 26
 1 2 -4 9554.26 431.484 3
 1 2 -4 9884.21 375.063 28
 1 2 -4 10126.4 442.156 4
 1 2 -3 18531.9 535.876 6
 -1 -2 3 16508.7 210.305 27
 1 2 -3 16898.5 503.22 3
 1 2 -3 17257 510.952 4
 -1 -2 3 17368.5 523.937 26
 -1 -2 3 17895 469.942 29
 1 2 -2 44476.9 761.008 5
 -1 -2 2 43266.5 675.094 29
 -1 -2 2 45182.2 475.108 27
 1 2 -2 42981.7 675.742 3
 -1 -2 2 41582 710.865 26
 1 2 -2 42870.2 685.727 4
 1 2 -1 81662.3 743.224 4
 1 2 -1 80025.7 702.334 3
 -1 -2 0 38592.9 623.875 28
 1 2 0 37034.7 315.735 4
 1 2 0 38553.1 726.742 6
 1 2 0 38636.5 672.654 2
 -1 -2 -1 32.5166 58.1531 28
 1 2 1 112.537 74.453 2
 1 2 1 36.4563 69.4037 5
 -1 -2 -2 8535.6 397.378 28
 -1 -2 -2 9207.35 444.805 25
 1 2 2 8514.29 423.715 5
 1 2 2 8453.44 415.003 2
 -1 -2 -3 6102.56 384.114 28
 -1 -2 -3 5951.64 401.806 25
 1 2 3 5637.25 382.359 5
 1 2 3 6017.17 400.192 2
 -1 -2 -4 171.605 91.1213 28
 1 2 4 314.851 151.544 2
 1 2 4 229.388 127.185 5
 -1 -2 -4 392.883 146.813 25
 1 2 5 3751.06 390.577 2
 -1 -2 -5 3802.43 379.515 25
 1 2 5 3984.14 385.262 5
 -1 -2 -5 4017.12 386.62 28
 1 2 6 2649.69 386.353 2
 -1 -2 -6 3101.26 384.327 28
 -1 -2 -6 3082.83 351.751 25
 1 2 6 2817.29 361.137 5
 1 2 7 6567.73 289.731 23
 -1 -2 -7 6112.72 560.967 28
 1 2 7 6085.08 550.256 5
 -1 -2 -7 5776.19 534.204 25
 -1 -2 -7 6292.79 285.988 35
 1 2 7 6226.85 275.829 24
 1 2 7 6420.81 282.082 38
 1 2 7 6086.65 282.646 18
 1 2 7 6640.97 286.511 20
 1 2 7 6390.82 277.319 33
 1 2 7 5634.17 566.999 2
 1 2 8 2984 204.884 23
 1 2 8 3320.02 209.988 24
 1 2 8 3278.26 207.097 20
 1 2 8 3448.18 215.211 38
 -1 -2 -8 3467.12 212.343 35
 1 2 8 3445.3 224.072 18
 -1 -2 -8 3520.55 202.402 39
 1 2 9 651.198 96.1833 20
 1 2 9 397.172 82.9698 38
 1 2 9 570.709 97.3553 24
 -1 -2 -9 579.128 85.353 39
 1 2 9 568.785 97.0693 23
 -1 -2 -9 529.782 92.1467 35
 1 2 10 -36.3302 43.3249 14
 -1 -2 -10 -31.5802 35.0652 35
 1 2 10 -73.8605 42.0417 20
 -1 -2 -10 19.8848 54.6084 12
 1 2 10 8.90959 47.5991 24
 1 2 10 40.4924 56.6745 23
 1 2 10 -5.09506 46.5253 38
 1 2 11 200.806 53.2885 38
 -1 -2 -11 194.131 46.1894 35
 1 2 11 258.446 45.7968 14
 1 2 11 169.514 48.6333 24
 1 2 11 237.5 63.3733 23
 1 2 11 272.899 55.8077 21
 -1 -2 -11 247.493 59.4824 12
 -1 -2 -12 1066.47 71.8141 12
 1 2 12 975.426 64.143 38
 -1 -3 14 -52.0435 21.2944 24
 -1 -3 14 -10.9045 20.7946 38
 1 3 -14 -22.7054 37.2016 35
 1 3 -14 27.4209 37.1161 39
 1 3 -13 615.172 69.9179 13
 1 3 -13 510.964 89.8129 35
 1 3 -13 637.486 93.4446 39
 -1 -3 13 529.949 71.6429 24
 -1 -3 13 581.668 86.3502 37
 -1 -3 13 434.558 68.586 38
 -1 -3 12 255.382 69.6467 24
 1 3 -12 199.422 71.5854 39
 -1 -3 12 127.597 57.0677 38
 -1 -3 12 95.0492 69.792 37
 1 3 -12 53.5984 49.0905 13
 1 3 -12 171.118 70.8925 35
 -1 -3 11 131.691 58.5983 24
 1 3 -11 43.3263 58.9088 35
 1 3 -11 161.581 65.3963 13
 1 3 -11 68.0636 51.655 10
 1 3 -11 112.415 52.431 39
 -1 -3 11 99.3241 62.7486 37
 -1 -3 11 103.758 56.7484 38
 1 3 -10 2786.3 192.944 39
 1 3 -10 2942.87 198.341 35
 1 3 -10 2977.37 193.634 13
 1 3 -10 3524.7 464.98 6
 -1 -3 10 3427.34 431.566 2
 -1 -3 10 2590.51 399.289 26
 -1 -3 10 3067.7 194.614 24
 1 3 -10 2744.62 386.994 3
 1 3 -10 2801.99 198.948 10
 -1 -3 10 2764.97 195.951 37
 -1 -3 10 3010.32 196.856 38
 -1 -3 9 110.493 188.545 26
 1 3 -9 332.536 66.4948 39
 1 3 -9 392.103 76.2896 35
 -1 -3 9 200.693 60.4937 37
 1 3 -9 246.705 67.47 13
 1 3 -9 285.955 66.249 10
 1 3 -9 7.09018 116.356 28
 1 3 -9 138.398 146.87 3
 1 3 -8 8031.79 529.904 28
 -1 -3 8 8147.13 735.648 26
 1 3 -8 8388.5 607.472 3
 -1 -3 8 8426.61 552.269 30
 -1 -3 8 9397.52 615.285 29
 1 3 -7 235.85 146.583 4
 -1 -3 7 -54.124 168.25 26
 1 3 -7 121.206 93.686 28
 -1 -3 7 -242.997 148.698 29
 1 3 -7 -75.6295 118.971 3
 -1 -3 6 4074.15 386.899 29
 1 3 -6 5229.16 415.576 6
 -1 -3 6 3976.73 470.189 26
 1 3 -6 5617.95 428.775 4
 1 3 -6 5343.06 351.858 28
 1 3 -6 5362.34 423.613 3
 -1 -3 5 5607.87 454.439 26
 1 3 -5 4352.68 345.06 6
 1 3 -5 5967.78 399.753 4
 1 3 -5 5491.62 385 3
 -1 -3 5 4940.03 388.847 29
 1 3 -4 29598.3 795.848 4
 -1 -3 4 29648.5 841.633 26
 -1 -3 4 28928.5 380.082 27
 1 3 -4 29026.1 798.84 6
 -1 -3 4 30394.8 775.65 29
 1 3 -4 28632.7 779.75 3
 -1 -3 3 30118.8 691.817 29
 1 3 -3 29749.5 713.228 4
 1 3 -3 30337.9 759.492 6
 -1 -3 3 30639.3 468.701 27
 1 3 -3 29236.7 694.666 3
 -1 -3 3 29561.9 730.171 26
 -1 -3 2 6603.36 261.058 27
 1 3 -2 6128.13 337.727 6
 -1 -3 2 6547.71 326.438 29
 1 3 -2 6477.04 279.052 3
 1 3 -2 6461.15 304.389 2
 1 3 -2 6503.53 295.544 4
 1 3 -2 6186.66 346.853 5
 -1 -3 1 16258.9 472.185 27
 1 3 -1 17525.5 341.104 3
 1 3 -1 16703.3 494.929 2
 1 3 -1 18165.8 404.981 4
 -1 -3 1 18178.1 402.543 28
 1 3 -1 17381.5 578.062 5
 1 3 -1 15885.2 530.661 6
 1 3 0 28648.9 376.266 4
 1 3 0 29458.9 779.807 5
 -1 -3 0 28577.2 589.956 28
 -1 -3 0 29045.9 723.83 25
 1 3 0 27046.2 722.737 6
 1 3 0 29232 712.523 2
 -1 -3 -1 8765.09 384.892 28
 1 3 1 9147.19 439.999 2
 1 3 1 8962.03 457.528 5
 -1 -3 -1 8977.09 447.901 25
 1 3 2 315.273 126.213 5
 -1 -3 -2 417.663 157.559 25
 1 3 2 433.539 139.416 2
 -1 -3 -2 471.27 115.006 28
 1 3 3 2992.87 326.24 2
 -1 -3 -3 3036.97 293.696 28
 -1 -3 -3 3183.37 330.353 25
 1 3 3 2851.15 310.968 5
 1 3 4 -111.991 107.89 5
 -1 -3 -4 51.3808 92.5347 25
 1 3 4 -17.9751 119.563 2
 -1 -3 -4 240.58 117.525 28
 1 3 5 616.301 171.968 5
 1 3 5 722.393 195.241 2
 -1 -3 -5 766.678 190.366 25
 -1 -3 -5 511.991 161.962 28
 1 3 6 551.152 90.5596 20
 1 3 6 431.761 77.9111 23
 1 3 6 772.988 224.986 2
 1 3 6 502.581 83.1828 33
 1 3 6 502.555 82.5945 18
 -1 -3 -6 286.445 118.098 28
 1 3 6 673.762 200.459 5
 -1 -3 -6 191.973 141.709 25
 -1 -3 -6 261.815 70.7302 35
 1 3 6 593.374 81.1343 38
 1 3 6 508.441 79.2965 24
 1 3 7 9536.84 349.172 33
 -1 -3 -7 9429.66 718.988 28
 -1 -3 -7 10109.5 742.345 25
 1 3 7 9769.65 348.147 38
 1 3 7 9670.96 357.241 23
 1 3 7 9771.89 344.53 24
 -1 -3 -7 10320.3 372.577 35
 1 3 7 9204.33 732.83 2
 1 3 7 9777.14 365.584 18
 1 3 7 9924.38 362.253 20
 1 3 8 368.771 83.3907 18
 1 3 8 517.846 91.7136 24
 1 3 8 481.039 89.9174 20
 1 3 8 516.885 88.3057 38
 1 3 8 532.03 95.3115 23
 -1 -3 -8 422.98 87.7563 35
 1 3 9 1014.45 124.63 23
 1 3 9 970.489 113.99 14
 1 3 9 972.762 108.168 24
 1 3 9 1134.99 126.004 21
 1 3 9 1032.45 115.214 38
 -1 -3 -9 1001.09 111.469 35
 1 3 9 1006.19 113.534 20
 1 3 10 137.546 47.1504 20
 -1 -3 -10 141.722 56.5588 12
 1 3 10 306.733 61.8193 14
 1 3 10 275.653 74.5779 23
 1 3 10 180.7 47.3106 24
 1 3 10 298.553 61.5392 38
 -1 -3 -10 209.157 46.3897 35
 1 3 10 257.472 63.1535 21
 -1 -3 -11 19.3006 31.0082 12
 1 3 11 -30.727 24.4134 38
 1 3 11 -18.6917 28.079 21
 1 3 11 7.7322 34.7084 23
 -1 -3 -11 -20.3678 18.2156 34
 1 3 11 -59.8547 25.2019 14
 1 4 -14 -4.64865 34.6626 39
 1 4 -14 10.3613 37.8457 35
 -1 -4 14 -14.489 31.8336 37
 -1 -4 14 2.91925 38.3282 17
 1 4 -13 121.734 59.0395 39
 1 4 -13 121.901 62.1718 35
 -1 -4 13 185.646 63.234 37
 1 4 -13 143.027 46.7723 13
 -1 -4 13 45.4373 24.455 38
 -1 -4 12 3266.17 205.356 37
 1 4 -12 3398.84 209.78 39
 -1 -4 12 3595.27 195.676 38
 1 4 -12 3286.5 207.445 35
 1 4 -12 3377.85 200.122 13
 1 4 -11 2537.5 188.071 13
 1 4 -11 2633.97 188.7 10
 -1 -4 11 2898.21 186.61 38
 1 4 -11 2580.22 189.784 35
 1 4 -11 2603.61 190.732 39
 -1 -4 11 2597.53 185.836 37
 -1 -4 10 1332.54 128.711 38
 1 4 -10 1038.45 123.904 35
 -1 -4 10 876.891 298.44 26
 1 4 -10 1171.68 127.103 39
 1 4 -10 1173.65 131.286 13
 -1 -4 10 1198.99 133.943 37
 1 4 -10 800.347 245.973 6
 1 4 -10 1181.59 133.367 10
 1 4 -9 5.86832 20.3927 13
 1 4 -9 80.3291 123.606 3
 1 4 -9 43.4082 46.7737 6
 1 4 -9 47.3199 46.6919 35
 -1 -4 9 -160.738 186.858 26
 -1 -4 9 18.2754 41.1127 37
 1 4 -9 -112.463 44.7376 10
 1 4 -9 44.6145 30.7678 39
 -1 -4 8 4186.91 445.579 29
 1 4 -8 4151.32 438.443 3
 1 4 -8 4616.12 459.083 4
 -1 -4 8 4197.22 577.062 26
 1 4 -8 4330.39 452.015 6
 -1 -4 7 11521.4 868.601 26
 1 4 -7 12073.3 697.071 4
 1 4 -7 12667.5 707.885 6
 1 4 -7 11803.2 689.044 3
 -1 -4 7 12197 770.988 29
 1 4 -6 6990.71 491.175 6
 1 4 -6 7547.95 508.578 3
 -1 -4 6 7517.79 617.928 26
 1 4 -6 7733.21 520.65 4
 -1 -4 6 6682.9 526.076 29
 -1 -4 5 137.154 115.462 29
 1 4 -5 -12.0837 104.874 3
 1 4 -5 37.0281 109.549 4
 1 4 -5 33.8555 98.7117 6
 -1 -4 5 50.8933 147.349 26
 1 4 -4 6148.5 381.368 3
 -1 -4 4 6203.17 409.478 26
 1 4 -4 5361.87 381.076 6
 -1 -4 4 6446.58 390.507 29
 1 4 -4 6115.05 388.102 4
 1 4 -3 8429.82 413.405 4
 -1 -4 3 9440.55 328.634 25
 1 4 -3 9250.67 413.598 3
 -1 -4 3 9261.55 447.38 29
 1 4 -3 8821.7 454.819 6
 -1 -4 3 9330.36 339.466 27
 -1 -4 3 8951.35 460.327 26
 -1 -4 2 88965.4 791.215 28
 1 4 -2 87451.1 1462.32 5
 -1 -4 2 89870.3 1181.4 25
 -1 -4 2 88814.6 1181.57 27
 1 4 -2 89488.5 1191.18 4
 1 4 -2 88013.2 1378.6 6
 1 4 -2 84355.1 1284.24 2
 1 4 -2 87179.8 1061.29 3
 -1 -4 2 88404.7 1401.96 29
 -1 -4 1 1019.81 151.35 25
 -1 -4 1 1492.63 122.214 28
 1 4 -1 1136.55 183.013 6
 1 4 -1 1148.37 211.832 5
 1 4 -1 1241.62 123.669 4
 -1 -4 1 1144.23 160.2 27
 1 4 -1 1225.78 171.67 2
 -1 -4 0 22010 695.581 27
 -1 -4 0 24050.8 586.514 28
 1 4 0 21809.1 721.921 2
 -1 -4 0 22765 724.747 25
 1 4 0 22607.8 773.457 5
 1 4 1 11980.3 595.232 5
 -1 -4 -1 12382.8 489.551 28
 1 4 1 11102.7 554.594 2
 -1 -4 -1 11327.7 568.119 25
 1 4 2 15068.8 698.925 5
 1 4 2 14211.3 680.641 2
 -1 -4 -2 15115 702.294 25
 -1 -4 -2 14785 608.388 28
 1 4 3 2465.11 302.376 5
 -1 -4 -3 2506.53 287.367 28
 -1 -4 -3 2444.88 316.154 25
 1 4 3 1834.2 285.983 2
 -1 -4 -4 2493.25 317.66 28
 1 4 4 2718.74 367.025 2
 -1 -4 -4 2630.03 358.428 25
 1 4 4 2735.45 352.094 5
 -1 -4 -5 5565.08 499.687 28
 1 4 5 5664.88 263.792 33
 -1 -4 -5 5622.11 529.41 25
 1 4 5 6065.8 272.804 20
 1 4 5 5989.58 268.229 23
 1 4 5 5961.69 528.077 5
 1 4 5 6152.06 575.746 2
 1 4 5 5770.84 263.493 18
 1 4 6 285.66 140.707 5
 -1 -4 -6 -163.787 94.8527 28
 1 4 6 138.703 65.4189 33
 1 4 6 42.1389 32.519 38
 -1 -4 -6 -51.1907 95.1632 27
 1 4 6 135.054 52.1301 23
 -1 -4 -6 5.67904 66.1856 35
 1 4 6 66.8961 121.38 2
 1 4 6 -5.92164 54.977 20
 -1 -4 -6 -402.827 155.207 25
 1 4 6 19.1895 29.9283 18
 1 4 7 -69.3935 55.8169 20
 1 4 7 17.3155 46.966 24
 1 4 7 16.8519 39.9728 18
 -1 -4 -7 -43.2745 62.3623 35
 1 4 7 -9.67673 49.2385 23
 1 4 7 -10.0209 39.2471 38
 1 4 8 3.04677 32.6944 38
 1 4 8 25.3912 37.753 18
 -1 -4 -8 -34.18 61.7874 35
 1 4 8 46.6927 32.0348 24
 1 4 8 -1.42163 55.279 14
 1 4 8 6.98164 54.9255 23
 1 4 8 -30.2182 62.7209 20
 1 4 8 60.1232 58.1072 21
 1 4 9 203.306 54.7797 38
 -1 -4 -9 202.301 46.7204 35
 1 4 9 249.184 70.5024 23
 1 4 9 268.594 70.2607 21
 1 4 9 210.428 64.825 14
 1 4 9 225.696 49.5702 24
 1 4 9 238.684 59.0532 20
 -1 -4 -10 68.4145 22.2573 35
 1 4 10 18.491 41.7127 23
 1 4 10 5.24978 24.905 20
 1 4 10 41.3848 24.9903 38
 1 4 10 58.5393 38.1164 21
 1 4 10 12.7132 33.4059 14
 -1 -4 -10 60.2694 38.1488 12
 1 5 -14 128.778 32.1094 13
 -1 -5 14 132.28 34.7351 37
 -1 -5 14 112.445 40.7573 17
 1 5 -14 167.509 45.4447 35
 1 5 -14 233.198 50.4998 16
 1 5 -13 220.39 58.6723 13
 1 5 -13 295.584 72.1782 35
 1 5 -13 192.018 63.1001 39
 -1 -5 13 293.549 62.3882 37
 1 5 -12 1468.15 142.445 35
 1 5 -12 1358.71 135.519 13
 -1 -5 12 1510.02 136.735 37
 1 5 -12 1559.44 140.704 39
 1 5 -11 76.3185 59.1057 13
 1 5 -11 66.37 56.553 39
 1 5 -11 94.8679 60.1661 35
 -1 -5 11 126.247 58.0144 37
 1 5 -10 6011.4 286.779 13
 -1 -5 10 6168.62 276.93 37
 1 5 -10 6157.56 290.632 35
 1 5 -10 6126.67 281.315 10
 1 5 -10 5784.32 271.951 39
 1 5 -9 -48.5447 47.4244 13
 1 5 -9 52.2949 52.3604 35
 1 5 -9 -4.10458 22.3482 39
 1 5 -9 -391.661 172.353 3
 -1 -5 9 -20.6254 41.4582 37
 1 5 -9 173.527 111.174 6
 -1 -5 9 477.132 236.039 26
 1 5 -9 30.2298 41.4927 10
 1 5 -8 14901.3 860.788 4
 1 5 -8 14411.7 847.834 3
 1 5 -8 14090.4 828.41 6
 -1 -5 8 16601.5 971.147 29
 -1 -5 7 6377.93 610.031 29
 1 5 -7 6726.02 541.579 3
 1 5 -7 6643.02 539.536 4
 -1 -5 7 6532.17 668.745 26
 1 5 -7 7323.97 566.07 6
 1 5 -6 921.096 211.134 4
 1 5 -6 862.257 198.834 6
 1 5 -6 1096.6 224.056 3
 -1 -5 6 590.922 179.423 29
 -1 -5 6 991.279 246.908 26
 -1 -5 5 8726.16 544.213 29
 1 5 -5 8382.78 527.326 4
 1 5 -5 8568.97 520.044 3
 -1 -5 5 9186.96 600.247 26
 1 5 -5 8825.42 538.452 6
 1 5 -4 4629.78 361.991 4
 -1 -5 4 4460.61 387.92 26
 1 5 -4 4865.71 355.964 3
 -1 -5 4 3898.91 352.844 29
 1 5 -4 4373.44 372.923 6
 -1 -5 3 1770.01 241.225 29
 -1 -5 3 1823.02 181.817 27
 1 5 -3 2303.36 214.587 3
 1 5 -3 1987.69 244.389 6
 -1 -5 3 1992.37 258.999 26
 1 5 -3 1990.2 218.576 4
 -1 -5 2 1941.46 210.173 27
 -1 -5 2 1794.89 239.542 29
 1 5 -2 1785.66 226.101 2
 1 5 -2 1948.42 245.214 6
 1 5 -2 2320.4 211.144 4
 -1 -5 2 2243.94 218.264 25
 1 5 -2 2004.81 264.765 5
 -1 -5 1 9572.94 494.303 27
 1 5 -1 9165.28 513.471 2
 1 5 -1 9534.61 527.712 6
 1 5 -1 10278.5 584.509 5
 -1 -5 1 9382.23 481.685 25
 1 5 0 8963.8 532.098 2
 1 5 0 8496.91 541.498 5
 -1 -5 0 8144.16 492.822 25
 -1 -5 0 7662.79 472.007 27
 -1 -5 -1 688.106 169.551 27
 1 5 1 894.447 195.833 5
 -1 -5 -1 978.809 196.635 25
 1 5 1 861.115 189.476 2
 -1 -5 -2 6650.06 515.46 25
 -1 -5 -2 6337.43 505.02 27
 1 5 2 7119.09 540.424 2
 1 5 2 6952.95 525.084 5
 -1 -5 -3 266.847 119.589 28
 -1 -5 -3 207.984 125.108 27
 1 5 3 259.539 159.661 2
 -1 -5 -3 -120.529 139.44 25
 1 5 3 369.797 125.824 5
 -1 -5 -4 465.057 166.052 27
 1 5 4 465.704 78.0271 23
 -1 -5 -4 641.681 190.264 25
 1 5 4 553.805 90.9421 18
 1 5 4 339.797 126.268 5
 1 5 4 850.067 206.883 2
 1 5 4 490.641 82.6876 21
 1 5 4 411.771 76.7348 33
 1 5 4 435.789 80.0861 20
 1 5 4 519.809 101.155 11
 1 5 5 2727.29 188.419 23
 1 5 5 3179.74 202.965 18
 -1 -5 -5 3018.44 397.909 27
 1 5 5 2896.28 199.884 21
 1 5 5 3124.03 207.483 33
 1 5 5 2681.97 374.213 5
 -1 -5 -5 2423.42 367.116 25
 1 5 5 3408.44 446.818 2
 1 5 5 2834.54 198.162 20
 -1 -5 -6 -5.61116 51.5707 35
 1 5 6 -5.82718 37.9148 23
 1 5 6 -52.7946 65.4619 20
 1 5 6 19.042 49.3371 21
 1 5 6 -12.6631 60.7653 14
 1 5 6 3.43017 39.2834 18
 1 5 7 786.676 111.495 14
 1 5 7 958.327 116.887 18
 1 5 7 654.717 110.441 20
 1 5 7 836.237 114.504 21
 1 5 7 867.484 112.305 23
 -1 -5 -7 1012.59 118.21 35
 -1 -5 -8 195.063 50.1409 35
 1 5 8 435.077 83.8263 14
 1 5 8 301.947 74.1625 23
 1 5 8 257.92 73.0966 20
 1 5 8 229.271 69.9055 21
 1 5 9 188.251 55.8697 21
 1 5 9 158.373 52.5237 23
 1 5 9 150.734 52.6245 14
 -1 -5 -9 146.591 44.194 12
 -1 -5 -9 143.8 36.36 35
 1 5 9 118.003 41.5158 20
 1 5 10 10.8222 18.5694 21
 1 5 10 59.6864 25.7837 23
 1 5 10 26.2367 19.4744 14
 1 6 -14 382.886 56.3171 16
 1 6 -14 446.961 52.324 13
 -1 -6 14 240.895 32.269 37
 1 6 -14 343.737 52.7584 35
 -1 -6 14 353.253 47.884 17
 1 6 -13 176.814 59.2649 13
 1 6 -13 187.429 61.5522 35
 1 6 -13 246.702 71.3314 16
 -1 -6 13 201.921 45.3439 37
 -1 -6 13 148.594 45.7218 17
 -1 -6 12 193.929 50.6703 37
 1 6 -12 157.748 67.8551 13
 1 6 -12 100.727 51.5015 39
 1 6 -12 230.945 71.6879 35
 1 6 -11 214.542 77.8849 13
 1 6 -11 162.696 67.4496 35
 -1 -6 11 279.523 69.5236 37
 1 6 -11 255.728 67.3514 39
 1 6 -10 248.861 74.3793 35
 1 6 -10 102.822 36.7477 10
 1 6 -10 175.153 70.7219 13
 1 6 -10 213.238 65.9579 39
 1 6 -9 5870.15 279.915 35
 1 6 -9 5854.57 282.615 13
 1 6 -9 5813.86 574.876 3
 1 6 -9 6137.36 275.016 39
 1 6 -9 6430.31 593.503 6
 -1 -6 9 4835.82 674.956 26
 1 6 -8 21782.8 508.78 15
 1 6 -8 23205.6 536.507 35
 1 6 -8 22936.7 531.535 13
 1 6 -8 23100.6 1102.44 4
 1 6 -8 22988.3 515.678 39
 1 6 -8 23664 1087.57 6
 1 6 -8 22005.9 1067.77 3
 -1 -6 8 24007.8 1248.19 29
 -1 -6 8 20452.3 1296.82 26
 -1 -6 7 11447.9 830.567 29
 1 6 -7 11165 715.726 6
 1 6 -7 12640.5 775.279 4
 1 6 -7 11693.9 733.032 3
 -1 -6 7 9792.6 821.121 26
 1 6 -6 4751.85 441.799 4
 -1 -6 6 4574.94 508.149 26
 -1 -6 6 4568.31 479.159 29
 1 6 -6 4386.98 412.318 3
 1 6 -6 4522.5 418.998 6
 -1 -6 5 3899 403.009 29
 1 6 -5 4057.54 405.822 6
 1 6 -5 4323.15 407.837 4
 -1 -6 5 4203.46 449.032 26
 1 6 -5 4607.81 394.861 3
 -1 -6 4 5109.28 460.136 26
 -1 -6 4 5281.18 444.102 29
 1 6 -4 6049.67 443.758 4
 1 6 -4 4756.8 415.12 6
 -1 -6 3 821.376 191.068 26
 1 6 -3 830.765 189.958 6
 1 6 -3 437.626 111.47 4
 -1 -6 3 712.623 165.523 29
 1 6 -2 -99.4564 107.207 6
 -1 -6 2 181.646 113.489 27
 -1 -6 2 204.504 135.21 29
 -1 -6 2 -225.255 77.0843 25
 1 6 -2 191.194 125.265 2
 1 6 -2 33.335 72.2393 5
 -1 -6 1 11874.7 614.403 27
 1 6 -1 11799.3 661.921 2
 -1 -6 1 12044.6 607.15 25
 1 6 -1 10997.7 675.837 5
 1 6 0 11864.1 684.803 2
 -1 -6 0 11178.5 640.817 27
 1 6 0 10705.9 678.032 5
 -1 -6 0 11273.7 634.009 25
 -1 -6 -1 259.082 124.582 27
 1 6 1 190.145 145.164 2
 1 6 1 -48.7759 102.136 5
 -1 -6 -1 97.0463 106.668 25
 -1 -6 -2 -45.848 80.9917 27
 1 6 2 11.2615 115.417 2
 -1 -6 -2 1.08815 33.729 25
 1 6 2 193.23 125.358 5
 1 6 2 129.084 57.8612 16
 1 6 2 60.3452 47.6749 20
 1 6 2 76.1082 57.6557 11
 1 6 2 -17.2146 25.7344 21
 1 6 3 -48.8604 60.9902 5
 -1 -6 -3 60.3071 89.9623 27
 1 6 3 166.08 80.9491 11
 1 6 3 280.949 68.9913 14
 1 6 3 132.493 64.1216 16
 1 6 3 199.751 56.8772 20
 1 6 3 -122.069 105.86 2
 1 6 3 186.111 55.5643 21
 1 6 3 228.001 69.5953 8
 1 6 3 148.136 54.1875 33
 -1 -6 -3 191.44 121.19 25
 1 6 4 81.3647 96.923 2
 -1 -6 -4 230.637 131.862 27
 1 6 4 198.239 72.2904 20
 -1 -6 -4 258.101 156.296 25
 1 6 4 205.028 63.1907 14
 1 6 4 190.175 64.7293 21
 1 6 4 172.544 56.693 23
 1 6 4 213.005 90.6289 11
 1 6 4 290.657 66.6702 18
 1 6 4 235.744 73.0874 33
 1 6 5 8069.19 316.19 18
 1 6 5 7398.48 315.942 21
 1 6 5 7529.09 314.569 14
 1 6 5 8057.11 313.613 23
 1 6 5 7561.65 321.524 20
 1 6 6 155.945 53.1227 18
 1 6 6 120.057 59.0512 21
 1 6 6 92.6841 78.2086 20
 -1 -6 -6 75.2849 54.9274 35
 1 6 6 147.03 50.8823 23
 1 6 6 106.005 53.3706 14
 -1 -6 -7 3134.24 170.491 35
 1 6 7 3168.03 192.455 14
 1 6 7 3232.48 193.667 20
 1 6 7 3413.57 199.435 21
 1 6 7 3299.88 185.337 18
 1 6 7 3424.8 188.985 23
 1 6 8 360.909 65.7936 21
 1 6 8 336.366 65.8828 20
 1 6 8 299.249 61.2246 14
 1 6 8 349.372 59.3413 23
 -1 -6 -8 266.715 46.7363 12
 1 6 9 354.946 45.6114 14
 1 6 9 333.238 46.8256 21
 1 7 -14 -76.4775 24.9147 13
 1 7 -14 32.0769 27.0475 16
 -1 -7 13 110.073 38.1724 17
 1 7 -13 212.223 59.7709 16
 1 7 -13 180.353 55.7476 13
 1 7 -13 106.231 48.8279 35
 1 7 -12 413.527 67.9137 11
 -1 -7 12 431.162 72.6581 17
 1 7 -12 361.083 81.7484 13
 1 7 -12 415.272 84.514 35
 1 7 -12 494.227 91.1927 16
 1 7 -11 434.577 85.8974 35
 1 7 -11 367.707 86.0118 13
 1 7 -11 359.758 69.955 11
 1 7 -11 305.675 87.8187 16
 -1 -7 11 467.54 77.8897 17
 1 7 -10 2026.4 170.045 13
 1 7 -10 2205.09 172.128 35
 1 7 -10 2010.38 176.451 16
 1 7 -9 7162.74 296.122 15
 1 7 -9 6550.11 296.258 13
 1 7 -9 7083.34 307.176 35
 1 7 -9 6453.42 301.628 16
 1 7 -8 1189.49 260.717 4
 1 7 -8 1101.82 130.306 16
 1 7 -8 1085.73 280.283 3
 1 7 -8 1000.22 120.652 35
 1 7 -8 1046.36 124.164 13
 -1 -7 8 879.581 276.322 26
 1 7 -8 1094.46 125.872 15
 1 7 -7 4267.83 236.062 15
 1 7 -7 4273.75 230.412 11
 1 7 -7 4427.77 234.961 35
 1 7 -7 4569.72 238.623 13
 1 7 -7 3853.98 437.345 4
 1 7 -7 4724.08 479.693 6
 1 7 -7 4290.59 236.543 16
 1 7 -7 4438.42 468.003 3
 -1 -7 7 3810.55 502.319 29
 -1 -7 7 3458.27 521.11 26
 1 7 -6 271.468 64.89 16
 1 7 -6 378.929 77.7516 15
 1 7 -6 380.544 66.649 13
 1 7 -6 452.377 77.6289 35
 -1 -7 6 169.365 153.861 26
 -1 -7 6 136.976 124.468 29
 1 7 -6 390.377 81.9368 22
 1 7 -6 370.403 71.2028 11
 -1 -7 5 263.257 136.279 29
 1 7 -5 217.181 95.687 4
 1 7 -5 287.656 139.015 6
 -1 -7 5 149.349 129.28 26
 1 7 -4 1725.04 277.745 6
 -1 -7 4 1630.68 301.556 26
 -1 -7 4 1814.1 290.382 29
 -1 -7 3 194.284 107.103 29
 -1 -7 3 454.508 165.552 26
 1 7 -3 221.277 122.731 6
 -1 -7 2 1632.95 287.357 29
 1 7 -2 1253.21 229.973 2
 1 7 -1 3330.31 410.413 5
 1 7 -1 3055.59 375.687 2
 -1 -7 1 3339.84 357.397 27
 -1 -7 1 2556.73 340.985 29
 1 7 0 50.6964 45.3632 11
 -1 -7 0 -24.951 141.752 27
 -1 -7 0 -255.639 115.316 25
 1 7 0 -74.4835 46.4226 21
 1 7 0 -45.9698 47.8196 20
 1 7 0 65.1874 43.3629 8
 1 7 0 305.115 144.189 2
 1 7 0 -10.9276 57.6752 16
 1 7 0 22.9105 38.7435 5
 1 7 1 165.039 57.7965 8
 1 7 1 233.734 60.8779 21
 -1 -7 -1 -4.48992 87.0079 25
 1 7 1 290.663 58.1585 14
 1 7 1 251.528 74.7612 16
 -1 -7 -1 523.405 160.2 27
 1 7 1 123.712 65.8899 11
 1 7 1 359.995 62.3839 33
 1 7 1 125.437 49.3088 20
 1 7 1 306.754 126.735 2
 1 7 1 259.485 136.308 5
 1 7 2 552.218 170.617 5
 -1 -7 -2 534.457 187.261 27
 1 7 2 377.61 89.7388 20
 1 7 2 407.845 76.8 21
 -1 -7 -2 357.519 140.175 25
 1 7 2 512.804 165.247 2
 1 7 2 252.752 88.2502 11
 1 7 2 284.789 64.0085 33
 1 7 2 253.571 75.2487 8
 1 7 2 279.814 91.5158 16
 1 7 2 278.429 70.8419 14
 1 7 3 429.672 88.8546 20
 1 7 3 466.143 85.6581 14
 1 7 3 511.962 107.683 11
 1 7 3 444.322 83.6409 33
 1 7 3 443.342 89.4481 8
 1 7 3 340.04 85.239 21
 1 7 4 135.719 59.5218 21
 1 7 4 146.082 73.3708 20
 1 7 4 155.879 64.6857 14
 1 7 4 186.698 99.2634 11
 1 7 5 3336.38 187.854 18
 1 7 5 3304.18 184.309 23
 1 7 5 3328.08 209.694 20
 1 7 5 3274.29 203.815 21
 1 7 5 3099.51 198.669 14
 1 7 6 18.8871 52.6618 14
 1 7 6 -2.2276 31.9581 23
 1 7 6 98.5153 46.2844 18
 1 7 6 -2.68843 56.7843 21
 1 7 6 58.2457 67.4747 20
 -1 -7 -6 6.05378 32.5769 35
 1 7 7 92.5994 34.788 23
 1 7 7 149.336 57.1282 20
 1 7 7 66.1964 42.9462 21
 1 7 7 71.0828 45.4731 14
 1 7 8 1550.46 87.0072 14
 1 7 8 1468.88 81.072 20
 1 7 8 1679.71 90.6763 21
 1 8 -13 80.2663 43.5804 13
 1 8 -13 71.507 38.5468 16
 1 8 -12 1754.5 135.989 13
 1 8 -12 1796.81 133.697 16
 1 8 -12 1576.06 122.689 35
 1 8 -12 1618.16 112.428 11
 1 8 -11 1012.17 106.415 11
 1 8 -11 909.452 116.363 13
 1 8 -11 947.935 112.046 35
 1 8 -11 734.459 108.382 16
 1 8 -10 2.07961 64.6922 16
 1 8 -10 73.963 53.4103 11
 1 8 -10 5.74083 51.3916 13
 1 8 -10 28.8435 54.7285 35
 1 8 -9 3252.13 205.15 15
 1 8 -9 3108.08 203.09 13
 1 8 -9 2999.18 209.251 16
 1 8 -9 2905.76 198.04 11
 1 8 -9 3092.14 202.367 35
 1 8 -8 1658.39 152.601 15
 1 8 -8 1521.95 146.999 13
 1 8 -8 1709.27 155.455 11
 1 8 -8 1681.52 156 35
 1 8 -8 1386.26 148.976 16
 1 8 -7 6128.45 280.602 13
 1 8 -7 5629.79 274.001 11
 1 8 -7 5797.05 282.749 15
 1 8 -7 6016.17 288.737 16
 1 8 -6 -72.682 55.3345 16
 1 8 -6 -12.3164 22.8433 9
 -1 -8 6 380.821 161.19 29
 1 8 -6 58.8605 35.4813 13
 1 8 -6 10.8458 40.9059 11
 1 8 -6 -41.1886 68.0858 15
 -1 -8 6 -425.104 209.609 26
 1 8 -5 1759.95 164.363 15
 1 8 -5 1860.94 158.215 11
 1 8 -5 1918.57 172.223 22
 -1 -8 5 1796.12 312.676 29
 1 8 -5 1897.31 155.197 8
 -1 -8 5 2185.15 368.399 26
 1 8 -5 1982.81 165.93 16
 -1 -8 4 823.881 234.733 26
 1 8 -4 575.145 98.2379 15
 1 8 -4 564.094 96.8098 16
 -1 -8 4 677.577 183.62 29
 1 8 -4 669.603 106.543 22
 1 8 -4 491.143 89.1129 11
 1 8 -4 606.244 96.2715 8
 1 8 -3 -66.0478 55.6931 11
 -1 -8 3 -81.9895 105.58 29
 1 8 -3 192.434 61.6282 22
 1 8 -3 -19.1574 37.9148 21
 1 8 -3 92.6102 56.6087 16
 1 8 -3 119.754 53.6505 15
 1 8 -3 -24.7182 43.3889 8
 -1 -8 3 -206.055 139.134 26
 -1 -8 2 666.306 225.216 29
 1 8 -2 686.46 108.605 11
 1 8 -2 579.735 94.301 15
 -1 -8 2 507.586 197.954 26
 1 8 -2 541.449 96.1775 8
 1 8 -2 683.18 97.2217 21
 1 8 -2 643.982 105.716 22
 1 8 -2 631.453 107.554 16
 1 8 -2 375.152 159.357 2
 1 8 -1 332.583 87.6454 16
 1 8 -1 411.339 91.8076 15
 1 8 -1 599.944 104.801 11
 1 8 -1 442.615 95.5066 8
 -1 -8 1 322.675 148.018 29
 1 8 -1 503.088 88.0431 22
 1 8 -1 479.961 78.0046 20
 1 8 -1 606.614 97.3537 21
 1 8 -1 260.615 114.093 2
 1 8 0 491.64 102.454 8
 1 8 0 537.621 101.524 11
 -1 -8 0 177.432 153.097 29
 1 8 0 499.465 80.9553 20
 1 8 0 369.254 139.509 2
 1 8 0 620.768 92.7233 22
 1 8 0 616.271 97.156 21
 1 8 0 530.099 108.564 16
 1 8 1 370.094 102.525 11
 1 8 1 464.783 104.312 16
 1 8 1 390.523 92.4326 8
 1 8 1 622.374 97.8722 20
 1 8 1 346.81 81.3314 21
 1 8 1 565.955 87.7778 14
 1 8 2 2280.51 179.501 8
 1 8 2 2289.18 178.2 20
 1 8 2 2524.29 201.258 11
 1 8 2 2241.2 176.578 21
 1 8 2 2577.71 179.805 14
 1 8 3 149.99 69.826 21
 1 8 3 144.057 70.2963 20
 1 8 3 180.709 89.5024 11
 1 8 3 177.335 71.7169 8
 1 8 3 137.215 56.9369 14
 1 8 4 409.69 94.1417 20
 1 8 4 390.487 80.6665 14
 1 8 4 487.244 92.2517 21
 1 8 5 139.663 60.4611 21
 -1 -8 -5 203.818 43.8388 35
 1 8 5 158.228 68.3758 20
 1 8 5 151.238 55.7474 14
 1 8 6 247.104 51.9416 14
 1 8 6 297.465 64.7207 20
 1 8 6 326.233 60.5626 21
 1 8 7 93.1947 24.9527 14
 1 8 7 33.0093 21.184 21
 1 8 7 31.5117 21.7256 20
 1 9 -13 41.7732 23.7673 16
 1 9 -13 5.74125 24.0549 13
 1 9 -12 1530.74 92.4131 11
 1 9 -12 1390.6 90.6899 9
 1 9 -12 1634.47 111.821 13
 1 9 -12 1483.01 109.71 16
 1 9 -11 202.503 54.6217 9
 1 9 -11 165.426 52.8864 11
 1 9 -11 173.795 57.1647 13
 1 9 -11 144.507 60.2174 16
 1 9 -10 551.237 97.4715 16
 1 9 -10 691.147 87.7124 15
 1 9 -10 686.172 97.6002 13
 1 9 -10 693.299 90.5414 9
 1 9 -10 649.57 92.1272 11
 1 9 -9 744.291 100.957 13
 1 9 -9 773.352 95.7251 9
 1 9 -9 845.895 114.572 11
 1 9 -9 808.704 105.715 15
 1 9 -9 874.194 125.197 16
 1 9 -8 285.129 68.2976 9
 1 9 -8 187.99 74.9613 15
 1 9 -8 338.937 75.5021 13
 1 9 -8 301.048 88.5014 11
 1 9 -8 156.611 75.8211 16
 1 9 -7 634.06 111.307 16
 1 9 -7 623.847 112.092 15
 1 9 -7 950.189 108.371 13
 1 9 -7 659.431 109.738 11
 1 9 -7 820.276 102.456 9
 1 9 -6 -37.2652 70.7423 16
 1 9 -6 7.24319 66.3882 15
 1 9 -6 -26.8958 62.3617 11
 1 9 -5 -21.1221 65.7171 11
 1 9 -5 58.8348 62.6391 16
 1 9 -5 69.5857 72.506 15
 1 9 -5 20.3381 40.7205 8
 1 9 -4 73.5938 62.9139 15
 1 9 -4 38.0396 71.1009 16
 1 9 -4 -44.2383 61.4962 8
 1 9 -4 -96.7848 84.6016 11
 1 9 -3 3992.57 238.535 11
 1 9 -3 4062.58 241.748 8
 1 9 -3 3744.38 233.884 15
 1 9 -3 3719.41 233.92 16
 1 9 -3 3832.28 234.524 22
 1 9 -2 93.886 72.7179 15
 1 9 -2 27.2245 58.5862 8
 1 9 -2 115.592 71.0444 11
 1 9 -2 169.32 80.1541 22
 1 9 -2 25.8184 70.0122 16
 1 9 -2 84.4608 46.3179 21
 1 9 -1 4284.23 247.408 11
 1 9 -1 4281.67 247.097 8
 1 9 -1 4442.61 235.053 21
 1 9 -1 4622.82 234.079 20
 1 9 -1 4018.23 246.121 16
 1 9 0 40.3815 84.6774 11
 1 9 0 23.9097 78.9275 16
 1 9 0 131.21 62.5655 20
 1 9 0 139.625 59.183 21
 1 9 0 -17.6333 67.6108 8
 1 9 1 3944.95 237.629 11
 1 9 1 3546.96 216.913 8
 1 9 1 3505.43 227.926 16
 1 9 1 3605.23 209.659 20
 1 9 1 3761.86 216.328 21
 1 9 2 533.351 83.4881 14
 1 9 2 536.066 91.1836 20
 1 9 2 463.462 84.8522 21
 1 9 2 657.987 95.9699 8
 1 9 2 405.234 108.105 11
 1 9 3 68.6197 55.0438 20
 1 9 3 113.839 58.8742 21
 1 9 3 173.524 55.9752 8
 1 9 3 91.4115 46.0389 14
 1 9 4 6.76975 30.9889 14
 1 9 4 34.6386 40.0366 21
 1 9 4 -21.6661 49.1766 20
 1 9 5 1.35694 18.7884 14
 1 9 5 17.7028 36.134 20
 1 9 5 17.25 29.9336 21
 1 10 -12 264.568 41.1385 16
 1 10 -11 80.5019 46.5371 16
 1 10 -11 203.876 36.4781 9
 1 10 -11 219.167 48.3585 11
 1 10 -11 159.199 42.6745 13
 1 10 -10 54.3565 35.9923 9
 1 10 -10 14.591 41.6313 13
 1 10 -10 -8.01873 55.8332 16
 1 10 -10 -42.0649 49.5344 11
 1 10 -9 853.46 86.716 9
 1 10 -9 882.685 93.7976 13
 1 10 -9 946.084 103.149 15
 1 10 -9 923.917 106.164 11
 1 10 -9 799.88 107.163 16
 1 10 -8 47.6635 37.2583 13
 1 10 -8 13.6957 63.8662 11
 1 10 -8 56.1812 61.5892 15
 1 10 -8 -73.2225 76.4248 16
 1 10 -7 4.5548 66.8433 15
 1 10 -7 -50.4902 70.6164 11
 1 10 -7 56.5408 71.6132 16
 1 10 -6 2246.01 180.844 16
 1 10 -6 2197.84 181.176 15
 1 10 -6 2221.27 156.066 8
 1 10 -6 1970.37 167.494 11
 1 10 -5 2989.92 206.137 16
 1 10 -5 2817.43 201.265 11
 1 10 -5 2875.32 189.398 8
 1 10 -5 2831.56 205.679 15
 1 10 -4 348.383 99.2463 15
 1 10 -4 231.225 87.3713 16
 1 10 -4 307.547 78.7103 8
 1 10 -4 300.699 96.2361 11
 1 10 -3 983.813 125.86 8
 1 10 -3 929.898 134.043 16
 1 10 -3 1001.97 132.835 11
 1 10 -2 275.506 80.6687 8
 1 10 -2 285.649 98.7799 16
 1 10 -2 462.246 78.0815 21
 1 10 -2 388.995 103.408 11
 1 10 -1 185.06 60.9999 21
 1 10 -1 82.7437 83.2474 16
 1 10 -1 87.2094 84.832 11
 1 10 -1 141.48 74.9814 8
 1 10 0 1381.27 150.443 16
 1 10 0 1009.34 123.813 8
 1 10 0 1369.25 120.117 21
 1 10 0 1379.97 117.323 20
 1 10 0 1154.23 137.96 11
 1 10 1 2543.98 173.765 11
 1 10 1 2563.67 155.366 20
 1 10 1 2596.27 154.704 21
 1 10 1 2609.96 164.333 8
 1 10 2 269.501 56.1399 8
 1 10 2 317.635 58.8173 21
 1 10 2 337.443 62.8514 20
 1 10 3 115.793 35.9599 21
 1 10 3 67.259 35.3061 20
 1 10 4 -22.3872 21.273 20
 1 11 -11 69.4485 25.8629 16
 1 11 -10 258.044 51.0629 16
 1 11 -10 222.16 43.2508 11
 1 11 -9 4928.04 197.598 16
 1 11 -9 4755.15 186.418 11
 1 11 -8 73.6156 57.1504 16
 1 11 -8 81.1817 60.3884 11
 1 11 -7 77.0759 60.0329 16
 1 11 -7 65.2499 62.5264 11
 1 11 -6 386.946 65.5788 8
 1 11 -6 431.796 89.5129 11
 1 11 -6 373.557 83.357 16
 1 11 -5 -72.8738 78.2932 16
 1 11 -5 38.6549 67.5692 11
 1 11 -5 59.3091 47.1609 8
 1 11 -4 274.541 85.6441 16
 1 11 -4 412.839 83.3928 8
 1 11 -4 436.344 94.2645 11
 1 11 -3 423.161 92.7776 16
 1 11 -3 498.823 93.4754 8
 1 11 -3 400.793 90.0815 11
 1 11 -2 705.622 104.642 11
 1 11 -2 923.408 110.343 8
 1 11 -2 900.393 116.513 16
 1 11 -1 921.802 108.269 11
 1 11 -1 1123.56 111.454 8
 1 11 0 1891.61 130.741 11
 1 11 0 1870.19 125.844 8
 1 11 1 215.491 46.3984 8
 1 12 -8 82.0177 36.5306 11
 1 12 -8 83.2206 34.2683 16
 1 12 -7 20.5856 33.6463 11
 1 12 -7 -45.1381 44.4776 16
 1 12 -6 212.96 55.6579 16
 1 12 -6 310.072 60.4959 11
 1 12 -5 360.082 65.8334 11
 1 12 -5 390.188 53.6826 8
 1 12 -5 479.966 72.1925 16
 1 12 -4 1089.33 94.2108 11
 1 12 -4 1094.96 96.362 16
 1 12 -4 939.37 82.2491 8
 1 12 -3 69.5883 48.3144 16
 1 12 -3 -30.7563 44.5485 8
 1 12 -3 31.4989 45.5197 11
 1 12 -2 -27.365 38.7207 8
 1 12 -2 -19.0197 39.8635 11
 1 12 -1 5.63982 25.8616 8
 -2 13 0 335.811 41.9207 8
 -2 13 -1 132.457 39.1874 8
 -2 13 -2 87.5531 31.0851 11
 -2 13 -2 137.175 43.6774 8
 -2 13 -3 1058.07 81.9874 8
 -2 13 -3 873.325 71.9594 11
 -2 13 -4 320.441 52.7104 11
 -2 13 -4 292.862 42.6174 8
 2 -13 4 272.706 43.2564 36
 -2 13 -4 305.904 44.3691 9
 2 -13 5 1407.46 95.8575 36
 -2 13 -5 1622.43 92.03 9
 -2 13 -5 1715.12 100.495 11
 -2 13 -6 474.184 53.1967 9
 -2 13 -6 472.423 57.3583 11
 -2 13 -7 827.914 64.391 11
 -2 12 2 813.233 70.7843 8
 -2 12 2 670.866 66.5975 20
 -2 12 1 28.7971 38.2599 20
 -2 12 1 38.6999 46.006 8
 -2 12 0 191.145 49.6434 20
 -2 12 0 242.258 65.9147 8
 -2 12 0 153.808 45.9921 11
 -2 12 -1 155.158 67.0121 8
 -2 12 -1 198.44 55.0492 9
 -2 12 -1 249.045 59.6948 11
 -2 12 -1 187.809 52.9493 20
 -2 12 -2 2497.56 140.838 20
 -2 12 -2 2550.47 149.516 16
 2 -12 2 2512.23 138.752 36
 -2 12 -2 2255.4 155.235 8
 -2 12 -2 2416.94 149.423 9
 -2 12 -2 2206.35 143.199 11
 -2 12 -3 123.944 57.14 11
 -2 12 -3 79.2921 56.8031 9
 -2 12 -3 38.6093 52.749 8
 -2 12 -3 79.7692 50.2182 16
 -2 12 -4 5792.05 236.771 11
 -2 12 -4 5494.54 231.275 9
 -2 12 -4 5749.72 225.19 8
 -2 12 -4 6019.01 224.452 16
 -2 12 -5 28.4365 54.8798 11
 -2 12 -5 8.76416 42.2161 16
 -2 12 -5 10.9414 45.7663 9
 -2 12 -6 497.338 67.3673 16
 -2 12 -6 364.264 71.3965 9
 2 -12 6 417.476 63.4382 32
 -2 12 -6 339.899 74.3582 11
 -2 12 -7 50.2903 48.4114 11
 2 -12 7 111.285 39.5756 32
 -2 12 -7 123.276 50.3334 9
 -2 12 -8 371.037 62.8622 9
 -2 12 -8 362.071 64.5789 11
 2 -12 8 365.271 56.6844 32
 2 -12 9 4.46097 22.4408 32
 -2 12 -9 43.5011 29.2348 9
 -2 12 -9 8.59986 33.9668 11
 -2 11 5 62.8018 26.3657 20
 -2 11 4 6.68323 39.1904 20
 -2 11 3 807.171 85.5453 8
 -2 11 3 862.773 94.0277 20
 -2 11 2 793.744 98.9214 8
 -2 11 2 658.29 93.4761 20
 -2 11 1 230.035 75.2343 8
 -2 11 1 284.294 74.5305 20
 -2 11 1 154.148 57.9499 11
 -2 11 0 1961.27 151.26 9
 -2 11 0 2030.33 165.876 8
 -2 11 0 2210.71 155.669 11
 -2 11 0 2153.52 158.132 16
 -2 11 -1 768.637 108.967 16
 -2 11 -1 756.37 109.526 8
 -2 11 -1 715.577 101.141 11
 2 -11 1 741.94 93.2987 36
 -2 11 -1 857.499 109.78 9
 -2 11 -2 2223.9 166.734 16
 -2 11 -2 2409.84 173.532 9
 -2 11 -2 2385.27 176.162 8
 -2 11 -2 2398.14 174.498 11
 -2 11 -3 1003.57 120.507 11
 -2 11 -3 1110.07 122.105 16
 -2 11 -3 1018.74 122.828 9
 -2 11 -3 1028.83 119.542 8
 -2 11 -3 1011.95 118.604 34
 -2 11 -4 -36.4341 62.4973 11
 -2 11 -4 -60.3549 59.7587 9
 -2 11 -4 88.2143 46.2415 8
 -2 11 -4 -2.4181 58.0509 16
 -2 11 -4 8.33934 47.9206 34
 -2 11 -5 2633.43 173.255 16
 -2 11 -5 2585.13 169.159 34
 2 -11 5 2279.84 159.787 32
 -2 11 -5 2525.42 182.232 9
 -2 11 -5 2437.28 180.459 11
 -2 11 -6 105.003 50.324 16
 -2 11 -6 123.145 65.2297 9
 -2 11 -6 290.797 62.9941 34
 -2 11 -6 167.553 81.6174 11
 -2 11 -7 393.748 80.3964 9
 -2 11 -7 391.503 91.0916 11
 -2 11 -7 332.895 70.1935 16
 -2 11 -8 1132.99 116.406 9
 -2 11 -8 1020.33 113.149 11
 -2 11 -8 976.855 91.5559 16
 -2 11 -9 220.558 66.2922 11
 -2 11 -9 164.021 56.6218 9
 2 -11 10 728.461 76.7927 32
 -2 11 -10 844.279 84.8156 11
 -2 11 -10 772.939 79.4251 9
 -2 11 -11 222.082 35.9116 9
 -2 11 -11 300.672 41.53 11
 2 -11 11 176.289 33.4386 32
 -2 10 6 213.353 32.3407 18
 -2 10 6 328.854 52.4865 20
 2 -10 -6 276.624 49.1181 35
 -2 10 5 114.337 34.3042 23
 -2 10 5 198.314 61.2415 20
 -2 10 5 171.652 42.5729 18
 -2 10 4 1030.1 98.9087 8
 -2 10 4 783.174 81.1024 23
 -2 10 4 1007.53 97.451 18
 -2 10 4 897.776 112.349 20
 -2 10 4 1028.98 102.935 33
 -2 10 3 2505.75 169.252 8
 -2 10 3 2585.21 163.742 18
 -2 10 3 2822.05 190.337 20
 -2 10 3 2741.23 166.329 33
 -2 10 2 1193.89 118.016 18
 -2 10 2 1083.77 118.604 11
 -2 10 2 1206.82 133.337 20
 -2 10 2 1070.54 112.036 33
 -2 10 2 1085.81 127.56 8
 -2 10 1 3431.56 211.383 9
 -2 10 1 3249.93 211.671 8
 -2 10 1 3366.46 201.753 11
 -2 10 1 3508.14 199.76 18
 -2 10 1 3386.02 211.502 16
 -2 10 0 2524.92 186.503 16
 -2 10 0 2414.21 185.68 9
 -2 10 0 2742.99 196.818 8
 -2 10 0 2668.26 185.239 11
 -2 10 -1 69.1165 59.0747 8
 -2 10 -1 -49.6132 65.4765 16
 -2 10 -1 76.2873 53.2937 11
 -2 10 -1 -31.069 48.9824 9
 -2 10 -1 19.6047 55.712 34
 -2 10 -2 113.671 64.4806 16
 -2 10 -2 47.9682 43.0442 8
 -2 10 -2 5.05093 41.4486 9
 -2 10 -2 -14.9234 55.6312 34
 -2 10 -2 -113.692 61.5005 11
 -2 10 -3 2687.61 191.618 11
 -2 10 -3 2796.73 198.425 9
 -2 10 -3 2999.59 202.153 8
 -2 10 -3 3227.04 207.011 16
 -2 10 -3 2872.12 197.9 34
 -2 10 -4 246.013 65.8636 8
 -2 10 -4 225.906 75.0258 11
 -2 10 -4 264.824 75.7135 34
 -2 10 -4 198.747 75.8539 9
 -2 10 -4 236.731 77.3512 16
 -2 10 -5 -11.3215 62.993 9
 -2 10 -5 8.16627 41.4333 34
 -2 10 -5 -15.8143 55.298 11
 -2 10 -5 -113.243 58.2218 16
 -2 10 -6 4973.38 258.938 9
 -2 10 -6 4887.79 257.972 11
 -2 10 -6 5426.04 254.181 34
 -2 10 -6 5542.05 260.733 16
 -2 10 -7 47.774 56.264 9
 -2 10 -7 55.2401 59.7347 13
 -2 10 -7 -18.5316 56.8652 11
 -2 10 -7 52.4573 38.5068 34
 -2 10 -7 55.3424 50.8413 16
 -2 10 -8 -39.4639 47.5956 16
 -2 10 -8 34.2483 56.0456 9
 -2 10 -8 11.3485 57.6866 13
 -2 10 -8 -11.2312 69.6509 11
 -2 10 -9 1563.52 140.822 13
 -2 10 -9 1559.71 141.192 11
 -2 10 -9 1693.25 145.658 9
 -2 10 -9 1661.35 124.403 16
 -2 10 -10 1350.01 120.667 13
 -2 10 -10 1468.51 100.801 16
 -2 10 -10 1530.45 124.387 9
 2 -10 10 1434.72 106.201 17
 -2 10 -10 1491.36 125.388 11
 -2 10 -11 462.077 66.4731 11
 -2 10 -11 470.135 67.9385 9
 2 -10 11 538.313 67.2125 32
 -2 10 -12 563.046 49.7917 9
 -2 10 -12 572.055 48.6952 11
 -2 9 7 -25.6864 29.7279 23
 -2 9 7 -11.7819 19.379 21
 2 -9 -7 -13.2064 40.2639 35
 -2 9 7 12.7199 35.7423 20
 -2 9 7 24.9334 29.774 18
 -2 9 7 3.89705 19.7649 14
 -2 9 6 148.298 62.1572 20
 -2 9 6 121.308 40.58 21
 -2 9 6 120.493 34.1267 14
 -2 9 6 140.205 48.3844 23
 -2 9 6 122.256 48.7671 18
 -2 9 6 181.203 59.3505 33
 -2 9 5 119.546 54.4456 18
 -2 9 5 140.463 50.8831 21
 -2 9 5 143.294 57.6526 23
 -2 9 5 111.387 59.8097 33
 -2 9 5 35.6814 61.1515 20
 -2 9 5 134.101 45.5684 14
 -2 9 4 2661.26 177.43 8
 -2 9 4 2523.67 186.805 20
 -2 9 4 2422.46 177.022 18
 2 -9 -4 2362.58 157.998 39
 -2 9 4 2607.87 178.213 33
 -2 9 3 228.582 75.826 18
 -2 9 3 119.545 64.4603 8
 2 -9 -3 126.09 50.3219 39
 -2 9 3 78.0109 66.6268 20
 -2 9 3 142.024 57.702 33
 -2 9 2 14342.4 429.632 16
 -2 9 2 13903.5 427.25 8
 -2 9 2 14336.7 436.437 9
 -2 9 2 15256.9 422.213 11
 -2 9 2 15254.4 423.586 33
 -2 9 2 14455.5 428.974 18
 -2 9 1 11525.5 390.159 9
 -2 9 1 12114.3 383.259 11
 -2 9 1 11992.7 391.446 16
 -2 9 1 11221 386.902 8
 -2 9 0 4507.61 247.118 34
 -2 9 0 4399.5 242.946 9
 -2 9 0 4991.71 251.811 11
 -2 9 0 4688.03 505.361 2
 2 -9 0 4748 515.282 29
 -2 9 0 4323.88 240.732 8
 -2 9 0 4481.8 241.117 16
 2 -9 0 4703.44 487.13 27
 2 -9 1 1834.93 307.025 27
 -2 9 -1 1759.47 159.326 9
 -2 9 -1 1826 161.935 8
 2 -9 1 1546.1 281.389 26
 -2 9 -1 1512.29 142.626 11
 -2 9 -1 1865.05 162.552 16
 -2 9 -1 1942.84 332.491 2
 2 -9 1 2507.22 363.422 29
 -2 9 -1 2013.75 165.043 34
 -2 9 -2 6380.34 285.604 8
 2 -9 2 5852.05 558.573 26
 -2 9 -2 6512.51 283.902 16
 2 -9 2 6146.58 554.718 27
 2 -9 2 7162.57 641.216 29
 -2 9 -2 6931.9 297.055 11
 -2 9 -2 6880.6 301.257 9
 -2 9 -2 6620.34 290.087 34
 -2 9 -3 -477.907 157.845 4
 -2 9 -3 16.6295 30.8922 8
 -2 9 -3 -25.1096 41.2063 9
 2 -9 3 541.354 166.294 27
 2 -9 3 -82.914 165.427 29
 -2 9 -3 104.492 58.1382 11
 2 -9 3 -141.637 117.267 26
 -2 9 -3 99.9692 55.3033 34
 -2 9 -3 -1.47939 56.4981 16
 2 -9 4 18825.5 1054.27 26
 -2 9 -4 17566.7 453.422 8
 -2 9 -4 17214.8 458.285 34
 -2 9 -4 16987.5 471.877 9
 -2 9 -4 16642.3 457.423 13
 -2 9 -4 16998.9 945.34 4
 -2 9 -4 17079.7 465.676 11
 -2 9 -4 17523 463.849 16
 2 -9 4 18337.8 1102.03 29
 -2 9 -5 8337.19 689.05 4
 -2 9 -5 7015.93 308.48 9
 2 -9 5 7608.42 725.849 26
 -2 9 -5 7538.36 317.074 11
 -2 9 -5 7913.66 317.165 16
 2 -9 5 7533.35 753.204 29
 -2 9 -5 6884.59 301.022 13
 -2 9 -5 7611.16 307.024 34
 -2 9 -6 350.272 81.4851 13
 -2 9 -6 275.979 78.7924 16
 -2 9 -6 402.23 81.895 9
 -2 9 -6 223.512 76.2015 11
 -2 9 -6 347.679 70.8671 34
 -2 9 -7 13679.6 406.786 16
 -2 9 -7 13100.8 391.828 34
 2 -9 7 13961.1 423.989 17
 -2 9 -8 724.414 112.943 13
 2 -9 8 606.814 90.4217 17
 -2 9 -8 613.713 97.7746 16
 -2 9 -9 1227.66 121.024 16
 -2 9 -9 1195.5 134.302 13
 2 -9 9 1308.92 128.251 17
 -2 9 -10 720.431 86.6583 16
 -2 9 -10 609.563 97.3077 13
 2 -9 10 799.428 96.4049 17
 2 -9 11 0.36054 30.7436 17
 -2 9 -11 56.844 47.4954 13
 -2 9 -11 31.6651 48.0214 11
 2 -9 12 -25.5534 23.2207 17
 -2 9 -12 -61.0949 35.3775 9
 2 -9 12 -36.3736 26.0056 32
 -2 9 -12 -15.9962 33.4234 11
 -2 8 9 17.6297 18.6167 23
 2 -8 -9 -1.62109 16.0423 35
 -2 8 8 366.788 58.8025 14
 -2 8 8 348.541 53.3705 21
 -2 8 8 263.78 57.0143 23
 2 -8 -8 280.265 58.414 35
 -2 8 8 296.969 52.9353 20
 -2 8 8 418.568 66.4273 18
 -2 8 7 121.612 51.5293 14
 -2 8 7 169.995 68.1278 33
 -2 8 7 154.025 60.5223 23
 2 -8 -7 160.562 71.8497 35
 -2 8 7 134.122 47.0898 21
 -2 8 7 198.147 63.4187 20
 -2 8 7 126.989 58.0534 18
 -2 8 6 77.63 55.2838 23
 -2 8 6 62.3343 62.1358 20
 -2 8 6 40.3195 52.3104 18
 -2 8 6 54.3589 30.0908 21
 -2 8 6 42.1806 52.6524 33
 2 -8 -6 35.8218 35.8837 39
 2 -8 -5 596.05 92.3051 39
 -2 8 5 514.007 85.1268 21
 -2 8 5 409.313 92.6507 20
 -2 8 5 510.287 89.3954 18
 -2 8 5 432.761 86.8567 33
 -2 8 4 5574.38 264.386 8
 -2 8 4 5170.33 269.274 20
 2 -8 -4 5308.17 251.645 39
 -2 8 4 5425.21 258.596 19
 -2 8 4 5276.95 250.935 21
 -2 8 4 5070.79 264.519 18
 -2 8 4 4958.14 254.259 33
 2 -8 -3 13793.5 863.379 25
 2 -8 -3 14191.2 868.398 27
 -2 8 3 14364.1 428.758 8
 -2 8 3 13568.1 413.442 33
 2 -8 -3 14017.8 860.984 29
 -2 8 3 13531.6 420.665 9
 -2 8 3 14001.7 891.178 2
 -2 8 3 13545.6 420.239 18
 -2 8 3 14284.2 411.611 19
 -2 8 2 235.76 69.4437 16
 -2 8 2 338.827 81.252 8
 -2 8 2 266.53 70.3398 9
 -2 8 2 247.096 126.275 2
 2 -8 -2 747.166 210.004 29
 2 -8 -2 207.206 145.153 27
 2 -8 -2 -236.849 152.22 25
 -2 8 2 230.636 58.9801 33
 -2 8 1 6090.41 275.82 34
 2 -8 -1 5846.12 529.966 29
 2 -8 -1 5569.61 534.405 27
 -2 8 1 5696.86 567.278 2
 2 -8 -1 5771.89 503.544 25
 -2 8 1 4982.17 237.625 11
 -2 8 1 6178.66 276.086 9
 -2 8 1 5663.27 258.67 16
 2 -8 0 8112.83 612.516 27
 -2 8 0 9619.3 340.173 9
 -2 8 0 9370.35 335.57 34
 -2 8 0 8711.31 671.35 2
 2 -8 0 8707.99 658.65 29
 2 -8 1 3630.63 416.688 29
 -2 8 -1 4684.45 447.153 4
 -2 8 -1 3725.36 445.989 2
 2 -8 1 3739.29 401.382 27
 2 -8 2 2103.85 333.363 29
 -2 8 -2 2458.71 347.087 4
 2 -8 2 2478.2 356.589 26
 2 -8 2 2010.47 297.061 27
 2 -8 3 5640.3 548.47 29
 -2 8 -3 4762.84 482.953 4
 2 -8 3 5035.39 500.213 26
 2 -8 3 5127.42 467.33 27
 -2 8 -4 1579.01 140.894 9
 -2 8 -4 1436 136.373 11
 -2 8 -4 1283 125.386 13
 -2 8 -4 1448.02 275.121 4
 2 -8 4 1485.28 288.382 26
 2 -8 4 1436.54 261.888 27
 -2 8 -4 1491.81 264.413 3
 2 -8 4 1543.65 326.244 29
 -2 8 -5 243.047 113.097 4
 -2 8 -5 213.869 64.2173 15
 -2 8 -5 405.568 74.9116 13
 -2 8 -5 445.897 77.6176 16
 -2 8 -5 321.965 63.201 34
 -2 8 -5 439.921 163.662 3
 2 -8 5 -173.87 165.87 29
 2 -8 5 2.90567 139.267 26
 2 -8 6 10168.8 899.37 29
 2 -8 6 9427.14 838.451 26
 -2 8 -6 9693.01 731.194 4
 -2 8 -6 9253.49 348.199 13
 -2 8 -6 9822.57 334.822 12
 -2 8 -6 9042.9 700.294 3
 -2 8 -6 10135.4 348.422 16
 -2 8 -6 9826.99 343.09 34
 2 -8 6 9278.3 337.518 17
 -2 8 -6 9803.66 354.114 35
 -2 8 -7 88.6324 48.4881 16
 2 -8 7 121.234 59.7256 17
 2 -8 7 200.447 201.46 29
 -2 8 -7 -24.116 28.8466 12
 -2 8 -7 317.537 164.677 4
 -2 8 -7 138.677 65.3551 13
 2 -8 7 -104.17 112.045 26
 -2 8 -7 162.222 74.2026 35
 -2 8 -7 108.985 194.001 3
 -2 8 -7 107.924 40.9644 34
 2 -8 8 600.352 95.7029 17
 -2 8 -8 522.25 98.9197 13
 -2 8 -8 525.882 95.8723 16
 -2 8 -8 746.856 96.2187 12
 -2 8 -8 691.344 94.5206 34
 -2 8 -8 631.605 107.627 35
 -2 8 -9 1109.4 128.853 13
 -2 8 -9 1060.35 114.982 16
 -2 8 -9 1149.58 117.804 12
 -2 8 -9 1045.37 125.522 35
 2 -8 9 1223.93 133.052 17
 -2 8 -10 2052.23 146.73 16
 -2 8 -10 1939.26 157.019 35
 -2 8 -10 1920.91 157.237 13
 -2 8 -10 1964.1 138.571 12
 2 -8 10 1905.38 157.005 17
 2 -8 11 349.623 72.8482 17
 -2 8 -11 338.575 61.908 16
 -2 8 -11 359.738 68.6501 13
 -2 8 -11 536.376 80.9434 35
 2 -8 12 287.632 55.7795 17
 -2 8 -12 312.874 56.4651 35
 -2 8 -12 244.529 48.6086 13
 2 -8 12 228.834 43.0289 32
 -2 8 -13 250.045 34.1307 11
 -2 8 -13 235.279 34.8803 9
 2 -8 13 282.607 35.3322 17
 -2 7 10 374.979 42.7022 14
 -2 7 10 384.363 40.1687 21
 2 -7 -10 370.822 40.5119 35
 -2 7 10 338.817 41.2997 23
 -2 7 9 19.8869 27.0685 20
 -2 7 9 -17.2789 38.0905 14
 -2 7 9 52.9831 48.0014 18
 2 -7 -9 5.97946 46.0245 35
 -2 7 9 26.2689 43.7822 23
 -2 7 9 58.1345 44.3478 21
 2 -7 -8 100.837 68.7747 35
 -2 7 8 91.6303 56.4796 33
 2 -7 -8 53.2569 33.6328 39
 -2 7 8 88.2603 57.6561 23
 -2 7 8 90.1696 53.0666 21
 -2 7 8 142.817 63.2537 18
 -2 7 8 72.9706 48.5661 20
 -2 7 7 239.094 79.7912 18
 -2 7 7 300.469 76.9706 23
 -2 7 7 268.69 74.1101 20
 -2 7 7 305.273 67.2862 21
 -2 7 7 143.997 74.2044 33
 2 -7 -7 285.596 67.8086 39
 -2 7 6 67.4104 68.7235 20
 2 -7 -6 107.591 56.2595 39
 -2 7 6 214.742 76.0269 33
 -2 7 6 124.811 62.4382 18
 -2 7 6 76.434 50.1711 21
 -2 7 5 1310.1 140.749 20
 -2 7 5 1168.53 131.56 33
 -2 7 5 1257.33 139.423 18
 2 -7 -5 1409.86 137.237 39
 -2 7 5 1339.17 136.445 19
 2 -7 -4 5982.25 567.676 27
 -2 7 4 6305.63 275.022 8
 -2 7 4 5614.62 268.372 33
 2 -7 -4 6176.75 589.157 25
 -2 7 4 5923.86 279.159 18
 -2 7 4 6113.48 276.635 19
 -2 7 4 6328.95 593.89 2
 2 -7 -3 2672.14 353.458 27
 -2 7 3 2449.15 173.257 19
 -2 7 3 2172.71 163.209 33
 -2 7 3 2333.19 169.319 9
 2 -7 -3 2005.92 330.923 25
 -2 7 3 1973.9 317.498 2
 -2 7 3 2119.02 171.347 16
 2 -7 -2 2779.41 359.857 25
 2 -7 -2 2228.61 341.572 27
 -2 7 2 2490.24 342.819 2
 2 -7 -2 2627.48 354.484 29
 2 -7 -1 28534.8 1099.47 27
 -2 7 1 28164.6 1119.59 2
 2 -7 -1 28316.7 1044.78 25
 2 -7 -1 29511.1 1109.02 29
 -2 7 1 31024.2 1048.63 4
 -2 7 0 7090.12 510.206 4
 2 -7 0 6162.41 496.476 27
 2 -7 0 7150.56 486.363 25
 -2 7 0 6028.52 507.605 2
 2 -7 0 5998.37 499.257 29
 2 -7 1 41.387 99.6474 29
 -2 7 -1 199.9 134.97 2
 2 -7 1 -85.0929 90.9656 27
 -2 7 -1 270.718 128.264 4
 -2 7 -2 2534.6 318.224 4
 2 -7 2 2998.26 348.994 26
 -2 7 -2 2763.16 308.751 3
 2 -7 2 2829.79 346.703 29
 2 -7 2 2752.59 329.145 27
 2 -7 3 6265.51 534.383 29
 2 -7 3 6250.48 475.497 27
 2 -7 3 5577.79 479.203 26
 -2 7 -3 6021.52 503.852 4
 -2 7 -3 5949.55 485.457 3
 -2 7 -4 8251.7 587.602 3
 -2 7 -4 8519.03 617.427 4
 2 -7 4 8699.74 630.741 26
 2 -7 4 8307.39 661.538 29
 2 -7 4 8533.78 564.679 27
 2 -7 5 4059.2 483.97 26
 2 -7 5 3680.21 394.324 27
 2 -7 5 2416.56 423.804 29
 -2 7 -5 3311.12 422.513 4
 -2 7 -5 3794.47 430.084 3
 -2 7 -6 494.338 173.054 3
 -2 7 -6 463.704 83.4457 13
 -2 7 -6 612.176 190.797 4
 2 -7 6 738.629 239.014 26
 2 -7 6 673.551 283.114 29
 -2 7 -6 290.532 69.3316 35
 -2 7 -7 -69.6721 75.9226 3
 -2 7 -7 198.815 68.7965 13
 -2 7 -7 143.023 61.3084 35
 -2 7 -7 40.6534 91.0606 4
 -2 7 -7 196.914 63.2653 16
 2 -7 7 -3.64976 37.0504 17
 -2 7 -7 211.414 57.9696 34
 -2 7 -7 47.098 24.4043 12
 -2 7 -8 24719.3 1191.89 4
 -2 7 -8 24274.1 541.152 12
 -2 7 -8 23575.5 556.379 13
 -2 7 -8 25360.1 544.664 34
 2 -7 8 23571.9 560.523 17
 -2 7 -8 23133.6 1168.16 3
 -2 7 -8 24137.9 559.145 35
 2 -7 8 22600.2 1423.15 26
 2 -7 8 24555.6 1366.54 29
 -2 7 -8 25207.8 555.604 16
 -2 7 -9 1553.34 151.178 35
 -2 7 -9 1998.08 163.434 16
 -2 7 -9 1545.93 148.905 13
 -2 7 -9 1873.1 150.938 12
 2 -7 9 1530.3 149.213 17
 2 -7 10 9308.38 312.56 37
 -2 7 -10 8878.99 313.413 12
 -2 7 -10 8594.7 322.659 13
 2 -7 10 8532.47 330.772 17
 -2 7 -10 8584.51 319.593 35
 -2 7 -10 9430.23 325.636 16
 -2 7 -11 48.5239 48.1246 13
 -2 7 -11 135.688 47.7953 12
 -2 7 -11 42.1926 45.1305 16
 2 -7 11 187.96 51.7961 37
 -2 7 -11 97.8454 53.2583 35
 2 -7 11 60.1571 58.5272 17
 -2 7 -12 71.4525 28.7074 12
 2 -7 12 120.388 34.8834 37
 -2 7 -12 134.106 40.6891 13
 -2 7 -12 174.023 47.0378 35
 2 -7 12 66.6277 50.7761 17
 -2 7 -12 36.8142 27.5638 16
 2 -7 13 28.7738 28.5714 17
 -2 6 11 422.797 42.187 14
 -2 6 11 334.626 39.2781 23
 -2 6 10 446.552 70.2168 23
 2 -6 -10 374.573 64.0452 35
 -2 6 10 437.897 68.6101 14
 2 -6 -10 472.238 52.5887 39
 -2 6 10 407.984 69.44 18
 -2 6 10 349.596 62.9132 21
 2 -6 -9 34.6249 29.4546 39
 -2 6 9 30.6599 61.9038 23
 -2 6 9 22.9743 47.7208 21
 -2 6 9 53.149 61.5921 18
 2 -6 -9 57.4316 64.3231 35
 -2 6 9 8.33772 45.2409 33
 -2 6 9 -11.3858 29.948 20
 -2 6 8 201.28 64.1682 20
 -2 6 8 179.58 73.7078 23
 2 -6 -8 248.486 70.1747 39
 -2 6 8 347.644 91.9667 18
 2 -6 -8 250.738 94.4389 35
 -2 6 8 166.684 67.5296 33
 2 -6 -7 42.9815 46.2952 39
 -2 6 7 105.099 56.7143 18
 -2 6 7 40.4759 61.039 33
 -2 6 7 76.8075 61.7706 20
 2 -6 -6 4.12574 41.0578 25
 -2 6 6 46.2487 59.2179 20
 -2 6 6 32.2689 41.8949 19
 -2 6 6 -4.07753 82.994 2
 -2 6 6 37.6928 52.0781 18
 -2 6 6 39.3962 57.3444 33
 2 -6 -6 -44.5998 46.8433 39
 2 -6 -5 3088.58 410.484 25
 -2 6 5 3688.27 217.419 33
 2 -6 -5 3602.82 432.238 27
 -2 6 5 3489.18 435.818 2
 -2 6 5 3540.26 215.018 18
 2 -6 -5 3336.24 203.529 39
 -2 6 5 3456.17 206.978 19
 2 -6 -4 214.565 101.043 27
 2 -6 -4 10.1409 91.7549 25
 -2 6 4 417.88 144.926 2
 2 -6 -3 6834.66 540.124 27
 -2 6 3 6219.41 523.511 2
 2 -6 -3 6501.01 520.533 25
 2 -6 -2 2498.02 307.182 27
 2 -6 -2 2114.81 291.396 25
 -2 6 2 1997.14 296.181 2
 2 -6 -1 424.15 136.246 29
 2 -6 -1 404.952 132.709 25
 2 -6 -1 469.024 150.466 27
 -2 6 1 445.096 109.762 1
 -2 6 1 527.141 161.899 2
 -2 6 1 525.382 148.538 4
 2 -6 0 431.236 144.359 29
 -2 6 0 418.757 131.259 4
 -2 6 0 463.388 151.844 2
 2 -6 0 274.34 102.879 25
 2 -6 0 516.652 156.688 27
 2 -6 1 2057.01 271.399 27
 2 -6 1 2500.68 237.506 25
 -2 6 -1 2312.14 292.412 2
 -2 6 -1 2347.73 284.686 4
 2 -6 1 2171.55 274.773 29
 2 -6 2 56633.1 1309.94 26
 2 -6 2 55772.3 1348.75 29
 2 -6 2 56059.4 1284.8 27
 -2 6 -2 56451.5 1289.02 3
 -2 6 -2 55650.3 1357.63 4
 -2 6 -3 6424.49 487.031 4
 2 -6 3 6381.5 493.306 29
 2 -6 3 5982.94 444.072 26
 2 -6 3 6242.95 437.79 27
 -2 6 -3 6462.01 464.504 3
 2 -6 4 1907.49 323.235 29
 -2 6 -4 1820.19 280.761 3
 -2 6 -4 1894.95 281.524 4
 2 -6 4 2212.69 280.284 27
 2 -6 4 2050.73 300.147 26
 2 -6 5 10889.5 753.899 26
 -2 6 -5 10823.4 680.331 4
 -2 6 -5 10711 671.858 3
 2 -6 5 11736.8 626.895 27
 2 -6 5 10523.2 783.041 29
 -2 6 -6 937.476 241.612 4
 -2 6 -6 1120.36 245.795 3
 2 -6 6 1075.52 357.855 29
 2 -6 6 1131.96 322.218 26
 2 -6 7 2722.89 477.086 26
 -2 6 -7 2051.61 332.43 4
 -2 6 -7 2754.38 182.101 13
 -2 6 -7 2488.9 168.717 12
 -2 6 -7 2741.36 378.849 3
 -2 6 -7 2617.97 180.634 35
 2 -6 7 2144.42 409.184 29
 -2 6 -7 2513.19 176.999 39
 2 -6 7 2567.43 180.314 17
 -2 6 -8 1246.27 278.321 4
 -2 6 -8 1214.72 131.855 13
 2 -6 8 882.135 298.716 26
 -2 6 -8 1260.11 134.073 35
 -2 6 -8 1446.88 135.271 12
 -2 6 -8 1287.55 135.72 39
 -2 6 -8 669.832 244.097 3
 -2 6 -8 1396.92 131.963 34
 2 -6 8 1342.08 133.279 37
 2 -6 8 767.008 275.467 29
 2 -6 8 1344.03 139.172 17
 -2 6 -9 145.041 51.7556 13
 -2 6 -9 111.174 61.2942 35
 2 -6 9 169.663 76.4669 17
 2 -6 9 109.92 55.3872 37
 -2 6 -9 150.457 66.8223 39
 -2 6 -9 149.88 52.7146 12
 -2 6 -9 240.415 59.9357 34
 2 -6 10 11353.2 389.869 17
 -2 6 -10 11666.1 373.445 13
 -2 6 -10 11370.5 374.297 35
 -2 6 -10 11114.7 364.636 12
 2 -6 10 11375.9 369.078 37
 -2 6 -11 250.504 61.227 13
 2 -6 11 239.858 63.8922 37
 -2 6 -11 239.216 59.1307 12
 2 -6 11 115.061 64.8112 17
 -2 6 -11 199.602 73.9961 35
 -2 6 -12 433.056 63.594 16
 2 -6 12 397.564 79.0106 17
 2 -6 12 456.377 69.4943 37
 -2 6 -12 349.246 58.3951 12
 -2 6 -12 381.388 65.0718 35
 2 -6 13 47.2801 23.2068 37
 2 -6 13 54.2707 32.3149 17
 -2 6 -13 23.8493 18.9969 35
 2 -5 -11 1939.46 115.994 35
 -2 5 11 2058.8 120.317 14
 -2 5 11 1720.15 92.8361 24
 -2 5 11 2086.37 122.861 23
 -2 5 11 1911.03 120.44 21
 2 -5 -11 1815.58 97.6665 39
 -2 5 10 78.1739 60.7932 18
 -2 5 10 139.682 66.8165 23
 -2 5 10 198.273 51.8254 24
 2 -5 -10 132.56 64.924 35
 2 -5 -10 184.326 47.0399 39
 -2 5 9 617.318 111.456 23
 -2 5 9 628.883 91.147 24
 -2 5 9 693.8 108.242 18
 -2 5 9 480.231 90.3391 33
 2 -5 -9 614.603 112.699 35
 2 -5 -9 668.291 97.3577 39
 -2 5 8 16090.7 462.926 23
 -2 5 8 16810.2 449.519 24
 2 -5 -8 15339.4 437.744 39
 -2 5 8 16003 471.748 18
 2 -5 -8 15073 476.022 35
 -2 5 8 17235.3 449.684 20
 -2 5 8 15814.4 450.644 33
 2 -5 -7 4981.76 493.323 28
 2 -5 -7 5357.71 560.016 25
 -2 5 7 5398.96 275.172 18
 2 -5 -7 5581.85 550.878 27
 -2 5 7 5921.57 265.827 24
 -2 5 7 5333.11 269.749 19
 -2 5 7 5409.53 268.508 33
 -2 5 7 5469.01 550.614 2
 -2 5 7 5633.63 261.907 20
 2 -5 -7 5456.52 265.007 39
 2 -5 -6 6684.09 567.34 27
 2 -5 -6 6618.01 594.688 25
 -2 5 6 6310.14 581.249 2
 -2 5 6 7081.87 297.639 33
 -2 5 6 7204.39 303.935 18
 -2 5 6 6731.13 291.191 19
 2 -5 -6 6579.76 281.327 39
 -2 5 6 7041.46 289.089 20
 2 -5 -6 6172.1 521.844 28
 2 -5 -5 223.167 139.789 25
 2 -5 -5 375.697 137.378 27
 -2 5 5 116.508 100.145 2
 2 -5 -4 4385.92 413.208 27
 2 -5 -4 4252.37 361.134 28
 2 -5 -4 3649.15 393.594 25
 -2 5 4 3864.56 403.585 2
 2 -5 -3 4876.55 419.005 27
 -2 5 3 5483.07 438.446 2
 2 -5 -3 5276.33 437.808 25
 -2 5 3 6225 397.574 30
 2 -5 -3 6774.63 405.731 28
 2 -5 -2 1766.1 243.81 27
 2 -5 -2 2001.53 253.755 25
 -2 5 2 1839.38 257.948 2
 -2 5 2 2038.89 236.227 30
 -2 5 2 2242.69 217.866 1
 -2 5 1 12287.1 587.52 2
 2 -5 -1 12740.2 580.145 29
 2 -5 -1 12715.3 596.29 27
 2 -5 -1 12424.7 557.879 25
 -2 5 1 13066.4 580.257 30
 -2 5 1 12735 507.401 1
 -2 5 0 41.8007 92.9712 30
 2 -5 0 36.3686 116.669 29
 2 -5 0 161.362 112.515 27
 2 -5 0 -66.9623 53.4881 25
 -2 5 0 39.9881 63.3174 1
 -2 5 0 -47.185 128.386 2
 -2 5 -1 108396 1691.16 30
 2 -5 1 107113 1617.05 29
 -2 5 -1 108348 1547.41 1
 -2 5 -1 106755 1644.21 2
 2 -5 1 105332 1585.92 27
 -2 5 -1 107193 1677.09 4
 2 -5 1 111601 1358.46 25
 2 -5 2 6541.31 401.303 26
 2 -5 2 6356.05 425.451 29
 -2 5 -2 6998.22 449.474 4
 2 -5 2 6690.6 411.279 27
 2 -5 2 6704.22 284.152 25
 2 -5 3 92252 1596.12 26
 -2 5 -3 91755.9 1664.05 4
 -2 5 -3 88699.8 1610.03 3
 2 -5 3 89309.1 1716.49 29
 2 -5 3 90359.7 1520.25 27
 2 -5 4 19077.8 913.37 29
 -2 5 -4 19274.1 802.584 4
 -2 5 -4 18106 778.9 3
 2 -5 4 19110 726.757 27
 2 -5 4 19064.4 840.127 26
 -2 5 -4 20386 612.286 6
 2 -5 5 808.086 279.775 29
 2 -5 5 1079.28 271.59 26
 -2 5 -5 849.829 142.363 6
 -2 5 -5 1018.58 229.983 4
 -2 5 -5 1268.67 238.541 3
 2 -5 5 981.922 202.684 27
 2 -5 6 1831.24 410.329 26
 -2 5 -6 2424.3 319.614 4
 -2 5 -6 2223.04 330.921 3
 2 -5 6 2100.01 422.691 29
 2 -5 7 21171 1267.03 26
 -2 5 -7 22208.9 1041.5 3
 -2 5 -7 20962.8 999.916 4
 2 -5 7 22338 1212.27 29
 2 -5 8 1143.73 284.045 29
 2 -5 8 1098.7 337.104 26
 -2 5 -8 1015.34 111.621 13
 -2 5 -8 1430.73 293.864 4
 -2 5 -8 827.029 227.99 3
 -2 5 -8 987.22 110.352 34
 -2 5 -8 1115.84 119.321 12
 -2 5 -8 1031.33 119.924 39
 2 -5 8 1160.23 123.83 37
 -2 5 -8 1070.51 123.478 35
 -2 5 -9 2756.55 188.969 13
 -2 5 -9 2546.39 186.671 35
 2 -5 9 2600.07 178.002 24
 -2 5 -9 2287.8 358.334 4
 -2 5 -9 2491.22 184.392 39
 -2 5 -9 2466.78 180.789 12
 2 -5 9 2714.99 194.354 37
 -2 5 -9 2838.47 184.29 34
 -2 5 -10 1329.1 139.63 12
 -2 5 -10 1449.8 148.782 39
 -2 5 -10 1499.65 136.375 13
 -2 5 -10 1450.59 129.629 34
 2 -5 10 1536.55 135.748 24
 -2 5 -10 1423 141.886 35
 2 -5 10 1445.77 144.633 37
 -2 5 -11 1002.39 117.123 35
 2 -5 11 821.172 97.553 24
 2 -5 11 834.59 111.875 37
 -2 5 -11 866.249 109.541 12
 -2 5 -11 1004.95 120.227 39
 2 -5 11 988.456 120.941 17
 -2 5 -12 1126.88 103.757 12
 -2 5 -12 1149.64 100.216 35
 2 -5 12 1101.74 108.802 37
 2 -5 12 1107.95 115.222 17
 2 -5 13 282.41 50.9368 17
 -2 5 -13 199.57 36.5636 12
 -2 5 -13 168.654 34.3736 35
 2 -5 13 282.174 49.0371 37
 -2 4 12 96.7066 33.1764 14
 -2 4 12 121.274 32.1354 24
 2 -4 -12 123.587 27.0651 39
 -2 4 12 152.424 39.1688 23
 2 -4 -12 82.6293 34.1845 35
 2 -4 -12 89.3064 35.6471 12
 -2 4 12 105.182 39.3466 21
 2 -4 -11 260.312 54.4747 39
 -2 4 11 256.944 64.8914 23
 -2 4 11 215.219 49.229 38
 2 -4 -11 152.5 59.8322 35
 -2 4 11 261.525 59.2503 24
 2 -4 -10 1041.99 118.225 39
 -2 4 10 1302.78 124.378 33
 -2 4 10 1357.51 130.674 24
 -2 4 10 1157.45 128.309 23
 -2 4 10 1216.71 117.183 38
 2 -4 -10 1086.26 133.284 35
 -2 4 10 1204.51 129.912 18
 -2 4 9 40.7624 58.852 18
 2 -4 -9 150.381 63.4433 39
 -2 4 9 112.149 71.287 23
 -2 4 9 129.321 53.3107 38
 -2 4 9 94.4888 49.2646 24
 2 -4 -9 135.911 87.6656 35
 -2 4 9 114.625 49.6682 33
 -2 4 8 14965.3 438.982 24
 -2 4 8 14994.8 434.12 33
 -2 4 8 14927.8 916.194 2
 -2 4 8 16052.4 437.3 38
 2 -4 -8 15416.9 904.809 28
 -2 4 8 15175.8 459.46 18
 2 -4 -8 14765.1 434.797 39
 2 -4 -8 15187.4 481.026 35
 2 -4 -8 14722.5 914.112 25
 2 -4 -7 373.887 142.194 28
 2 -4 -7 478.252 84.9637 39
 2 -4 -7 577.285 207.541 25
 -2 4 7 364.219 77.4238 24
 -2 4 7 379.129 63.1141 38
 -2 4 7 473.552 91.3909 18
 2 -4 -7 605.991 177.231 27
 -2 4 7 470.633 78.8092 19
 -2 4 7 193.78 110.727 2
 -2 4 7 374.887 78.393 33
 2 -4 -6 2845.06 355.441 27
 2 -4 -6 2767.37 375.873 25
 -2 4 6 2587.5 346.517 2
 2 -4 -6 2503.3 331.72 28
 2 -4 -5 1099.42 202.429 28
 2 -4 -5 1273.39 217.651 27
 2 -4 -5 1134.55 233.291 25
 -2 4 5 1304.07 244.064 2
 2 -4 -4 100.166 75.2301 27
 2 -4 -4 59.5731 125.813 25
 -2 4 4 303.52 89.9123 1
 -2 4 4 83.8049 80.7356 2
 -2 4 4 101.482 76.2287 30
 2 -4 -4 69.8986 82.3936 28
 -2 4 3 21392.7 768.329 2
 2 -4 -3 20329.9 748.39 27
 2 -4 -3 20925.6 773.735 25
 -2 4 3 21666.4 655.01 1
 -2 4 3 21572.2 673.855 30
 -2 4 3 22540.3 566.445 5
 2 -4 -3 21232 681.991 28
 2 -4 -2 10800.7 510.693 27
 2 -4 -2 10325.2 412.445 28
 -2 4 2 9921.32 487.741 2
 2 -4 -2 10264.7 496.447 25
 -2 4 2 10084.8 427.24 1
 -2 4 2 9716.54 449.864 30
 -2 4 1 102876 1439.84 30
 2 -4 -1 106062 1490.4 27
 -2 4 1 102026 1458.22 2
 -2 4 1 107293 1366.94 1
 2 -4 -1 104399 1434.88 25
 -2 4 0 4013.3 294.439 30
 2 -4 0 4043.02 283.294 29
 -2 4 0 3780.87 281.78 2
 2 -4 0 3911.22 289.394 27
 2 -4 0 4181.22 264.205 25
 -2 4 0 4192.95 277.297 1
 -2 4 -1 3262.73 277.255 30
 -2 4 -1 3083.93 261.437 4
 -2 4 -1 3075.94 258.501 2
 2 -4 1 2995.13 200.859 25
 2 -4 1 2904.59 243.869 27
 -2 4 -1 3055.46 250.761 1
 2 -4 1 3189.23 261.071 29
 -2 4 -2 48883.6 1040.18 30
 -2 4 -2 48924.5 605.258 28
 2 -4 2 48288.4 958.019 26
 2 -4 2 48957 688.915 25
 -2 4 -2 48455.8 595.706 6
 2 -4 2 45932 972.381 27
 -2 4 -2 47847.9 1051.78 4
 2 -4 2 47949.1 1055.87 29
 -2 4 -3 55057 784.04 28
 -2 4 -3 54943.5 1183.46 4
 2 -4 3 54837.7 1104.72 27
 2 -4 3 55632.2 1201 26
 2 -4 3 57361.6 1340.68 29
 -2 4 -4 5346.45 296.512 28
 2 -4 4 4881.57 492.98 29
 2 -4 4 5160.49 367.288 27
 -2 4 -4 4792.51 385.33 4
 -2 4 -4 4618.33 389.611 3
 2 -4 4 5785.68 493.433 26
 -2 4 -5 720.151 137.848 28
 -2 4 -5 626.658 156.956 4
 2 -4 5 865.629 293.595 26
 -2 4 -5 488.248 178.67 3
 2 -4 5 372.949 232.541 29
 -2 4 -6 8582.39 492.897 28
 2 -4 6 7779.95 672.418 29
 -2 4 -6 8210.77 561.477 4
 2 -4 6 7630.52 702.327 26
 -2 4 -6 7869.77 574.835 3
 -2 4 -7 1293.75 202.043 28
 2 -4 7 744.32 275.263 29
 -2 4 -7 1094.32 236.559 4
 -2 4 -7 1107.91 226.021 3
 2 -4 7 1241.48 331.635 26
 2 -4 8 7459.11 695.63 26
 -2 4 -8 7134.76 283.249 34
 2 -4 8 7474.93 306.192 37
 -2 4 -8 6928.16 589.191 4
 -2 4 -8 7235.83 296.012 12
 -2 4 -8 7659.85 628.895 3
 -2 4 -8 7318.1 296.536 35
 2 -4 8 7321.48 293.909 24
 2 -4 8 5798.1 265.008 23
 2 -4 8 7178.35 648.162 29
 -2 4 -8 7447.74 304.177 39
 2 -4 9 10117.4 343.591 38
 2 -4 9 9386.42 735.526 29
 2 -4 9 9370.57 343.533 24
 -2 4 -9 9245.47 352.607 39
 2 -4 9 9745.19 361.523 37
 -2 4 -9 9102.74 341.3 12
 2 -4 9 10239.2 807.558 26
 -2 4 -9 8986.77 716.338 3
 -2 4 -9 9228.07 329.18 34
 -2 4 -9 9896.25 355.042 35
 -2 4 -10 336.578 76.585 35
 2 -4 10 459.403 97.3224 37
 -2 4 -10 334.786 83.097 39
 -2 4 -10 302.273 73.8454 12
 2 -4 10 404.384 84.1359 24
 2 -4 10 351.084 78.0695 38
 -2 4 -10 312.319 68.4542 34
 -2 4 -11 464.563 86.5261 35
 -2 4 -11 376.914 80.9922 39
 -2 4 -11 521.698 90.8519 12
 2 -4 11 360.716 76.3418 38
 2 -4 11 363.887 77.8863 24
 2 -4 11 418.464 90.5833 37
 2 -4 11 381.657 82.1258 17
 2 -4 12 1413.01 121.374 37
 -2 4 -12 1303.33 116.257 12
 -2 4 -12 1277.42 106.286 35
 2 -4 12 1273.21 99.5525 38
 2 -4 12 1322.79 119.508 17
 2 -4 13 364.762 53.8493 17
 -2 4 -13 273.281 43.9559 12
 2 -4 13 302.713 50.3276 37
 -2 4 -13 268.837 37.5957 35
 -2 3 13 276.778 35.5289 21
 2 -3 -13 194.563 31.5246 35
 -2 3 12 206.515 50.7434 23
 2 -3 -12 197.36 52.7611 12
 -2 3 12 250.579 57.7968 24
 2 -3 -12 178.06 53.1689 35
 -2 3 12 241.186 50.0525 38
 2 -3 -12 255.969 53.3446 39
 -2 3 11 36.2975 54.2209 23
 -2 3 11 45.0647 50.0252 24
 2 -3 -11 102.382 51.6375 39
 -2 3 11 -15.2978 56.4972 18
 2 -3 -11 94.6131 69.3392 35
 -2 3 11 35.2368 48.5359 38
 -2 3 10 1475.86 133.08 33
 -2 3 10 1411.48 140.913 24
 -2 3 10 1263.35 137.312 23
 -2 3 10 1431.52 137.32 38
 2 -3 -10 1309.82 136.665 39
 2 -3 -10 1367.86 144.045 35
 -2 3 10 1253.75 141.974 18
 -2 3 9 2684.57 191.545 24
 -2 3 9 2765.35 197.415 23
 -2 3 9 2745.4 191.469 38
 2 -3 -9 2508.9 185.771 39
 -2 3 9 2606.68 197.777 18
 2 -3 -9 2682.9 207.415 35
 -2 3 9 3059.67 195.547 33
 -2 3 8 22259.7 542.493 18
 2 -3 -8 22621.1 1084.07 25
 2 -3 -8 22672.4 1084.67 28
 -2 3 8 21646.2 511.092 38
 -2 3 8 21966.2 528.754 19
 -2 3 8 21451.7 1069.59 2
 -2 3 8 21851.3 523.885 24
 2 -3 -8 22437.1 570.362 35
 -2 3 8 21711.9 508.953 33
 2 -3 -8 21884.7 521.857 39
 2 -3 -7 1284.35 264.422 28
 2 -3 -7 1303.79 223.796 27
 2 -3 -7 2018.29 309.099 25
 -2 3 7 1626.04 294.381 2
 -2 3 6 35332.1 1174.23 2
 2 -3 -6 35548.6 1107.16 27
 -2 3 6 39379.5 1066.77 1
 2 -3 -6 35502 1154.95 28
 2 -3 -6 35466.7 1178.32 25
 -2 3 5 13114.6 567.106 1
 -2 3 5 12481.1 635.559 2
 2 -3 -5 12349.6 643.256 25
 2 -3 -5 13038.6 637.692 28
 2 -3 -5 12007.7 595.679 27
 -2 3 4 110435 1434.95 30
 2 -3 -4 105178 1616.2 28
 2 -3 -4 105897 1622.94 27
 -2 3 4 107491 1672.78 2
 2 -3 -4 107776 1738.46 25
 -2 3 4 105380 1479.86 1
 -2 3 3 5168.52 309.643 30
 2 -3 -3 4706.49 306.404 28
 2 -3 -3 5170.79 334.743 27
 2 -3 -3 5198.29 358.903 25
 -2 3 3 5278.15 214.606 5
 -2 3 3 4859.09 328.401 2
 -2 3 3 4932.74 302.187 1
 -2 3 2 61553.1 985.899 1
 2 -3 -2 60758.8 940.618 28
 -2 3 2 62611.4 1040.19 2
 2 -3 -2 61649.4 1044.07 27
 -2 3 2 61346 1014.28 30
 2 -3 -2 61437.8 1081.86 25
 2 -3 -1 15540.1 453.944 29
 -2 3 1 15172.1 478.78 2
 2 -3 -1 15092.8 495.351 27
 2 -3 -1 15156.2 490.06 25
 -2 3 1 15895.5 487.246 1
 -2 3 1 15236.8 499.692 30
 -2 3 0 11581.5 441.18 30
 2 -3 0 12407.8 405.673 29
 -2 3 0 12422.4 429.065 1
 2 -3 0 11743.3 426.57 27
 2 -3 0 12165.2 397.022 25
 -2 3 0 11986.7 418.633 2
 2 -3 1 2312.03 207.79 27
 2 -3 1 2350.38 180.715 26
 2 -3 1 2589.95 219.478 29
 2 -3 1 2251.7 161.154 25
 -2 3 -1 2203.83 195.874 1
 -2 3 -1 2321.38 206.851 30
 -2 3 -1 2562.94 219.365 4
 -2 3 -1 1853.29 67.1262 6
 -2 3 -2 7899.5 381.24 1
 -2 3 -2 7584.75 368.892 30
 2 -3 2 7617.14 433.139 29
 2 -3 2 7925.55 376.452 26
 2 -3 2 7446.36 377.098 27
 -2 3 -2 7606.98 292.632 28
 -2 3 -2 7638.48 385.151 4
 2 -3 3 46615.8 1218.59 29
 -2 3 -3 50393.8 864.506 28
 -2 3 -3 50162.2 1054.07 4
 2 -3 3 49131.3 1151.61 26
 2 -3 3 50910.1 1026.44 27
 2 -3 4 1782.3 314.751 26
 2 -3 4 1770.48 338.952 29
 -2 3 -4 1920.53 203.509 28
 -2 3 -4 1908.62 240.969 3
 -2 3 -4 2096.37 245.133 4
 -2 3 -4 2157.22 148.493 25
 -2 3 -5 34158.4 932.951 28
 2 -3 5 31570.7 1224.38 26
 -2 3 -5 35037.2 1070.03 3
 -2 3 -5 33698.5 1006.67 4
 2 -3 5 32716.1 1208.36 29
 2 -3 6 3387.55 407.027 29
 -2 3 -6 2798.29 311.233 28
 -2 3 -6 3003.51 347.631 3
 -2 3 -6 2847.15 331.779 4
 2 -3 6 2913.26 427.919 26
 -2 3 -7 2125.5 297.178 28
 2 -3 7 1936.9 334.217 29
 -2 3 -7 1957.53 278.62 4
 2 -3 7 2261.74 382.52 26
 -2 3 -7 1902.23 292.261 3
 -2 3 -8 1370.16 132.969 12
 -2 3 -8 1271.07 236.125 28
 2 -3 8 1319.08 298.838 26
 -2 3 -8 1112.63 260.763 3
 -2 3 -8 1472.3 137.46 39
 2 -3 8 1215.04 126.023 23
 -2 3 -8 1632.69 271.969 4
 2 -3 8 1478.02 139.573 24
 2 -3 8 1551.01 140.612 38
 2 -3 8 1072.89 265.972 29
 2 -3 8 1547.94 145.498 37
 -2 3 -8 1557.18 143.57 35
 -2 3 -8 1343.35 125.764 34
 2 -3 9 8731.45 346.475 37
 2 -3 9 8728.8 715.423 2
 -2 3 -9 8041.99 322.472 12
 2 -3 9 8882.82 341.784 24
 2 -3 9 8693.15 332.109 23
 2 -3 9 9184.38 721.121 29
 -2 3 -9 9437.58 347.905 39
 -2 3 -9 8723.12 328.414 34
 2 -3 9 9599.14 761.304 26
 2 -3 9 9063.21 334.018 38
 -2 3 -9 8845.57 682.509 3
 -2 3 -9 8990.07 336.551 35
 2 -3 10 367.374 88.2053 24
 2 -3 10 459.99 94.5303 23
 -2 3 -10 476.453 91.7965 12
 -2 3 -10 506.866 94.614 39
 2 -3 10 540.788 97.2088 37
 -2 3 -10 554.175 99.3695 35
 2 -3 10 570.116 93.6667 38
 -2 3 -10 445.994 85.8547 34
 -2 3 -11 -20.1073 49.5721 35
 2 -3 11 26.3948 40.967 38
 2 -3 11 -25.2782 55.4981 24
 -2 3 -11 51.0957 52.8551 12
 -2 3 -11 -70.5958 52.7818 39
 -2 3 -11 -19.0825 43.919 34
 2 -3 11 24.5038 55.7932 37
 -2 3 -12 54.0271 38.2336 39
 2 -3 12 7.78019 35.1308 24
 -2 3 -12 54.1169 31.4478 35
 2 -3 12 115.506 58.4088 37
 -2 3 -12 76.9028 49.3872 12
 2 -3 12 73.2867 36.7347 38
 2 -3 12 43.8859 40.0608 17
 -2 3 -13 83.4596 31.5827 12
 2 -3 13 51.8421 34.0245 37
 2 -3 13 -35.1085 22.3629 17
 -2 2 13 61.416 33.4636 38
 -2 2 13 92.805 35.9497 24
 -2 2 13 61.9303 24.2207 14
 -2 2 13 71.9231 24.0788 23
 2 -2 -13 94.4653 38.7234 35
 2 -2 -13 112.72 31.6653 12
 2 -2 -13 97.1373 32.7306 39
 -2 2 12 354.131 71.0769 24
 2 -2 -12 370.782 66.936 12
 -2 2 12 388.41 68.0584 23
 -2 2 12 489.512 81.2444 38
 -2 2 12 345.579 58.736 37
 2 -2 -12 361.054 74.1546 35
 2 -2 -12 410.182 69.8909 39
 2 -2 -11 334.578 87.4145 35
 -2 2 11 419.586 90.4461 38
 -2 2 11 521.158 83.1187 37
 -2 2 11 485.842 93.3117 24
 -2 2 11 510.264 89.731 18
 -2 2 11 484.212 84.7023 23
 2 -2 -11 318.479 83.0625 39
 2 -2 -10 1315.83 146.704 35
 -2 2 10 1526.32 149.912 18
 -2 2 10 1591.5 152.689 24
 -2 2 10 1426.25 140.78 38
 -2 2 10 1462.49 142.428 23
 2 -2 -10 1315.46 134.938 39
 -2 2 10 1656.98 148.516 37
 -2 2 9 7628.52 314.875 38
 -2 2 9 7532.59 316.603 24
 -2 2 9 7852.76 326.661 18
 2 -2 -9 7045.63 634.115 28
 -2 2 9 7758.97 318.237 23
 2 -2 -9 7545.94 301.677 10
 -2 2 9 7599.9 306.378 37
 2 -2 -9 7684.36 329.733 35
 -2 2 9 7571.66 644.021 2
 2 -2 -9 7315.76 309.307 39
 -2 2 8 21903.5 1035.08 2
 -2 2 8 22028.6 505.188 38
 -2 2 8 22315.5 517.396 19
 2 -2 -8 21986.3 512.927 39
 2 -2 -8 22737.9 1055.39 28
 -2 2 8 21906.2 512.174 24
 2 -2 -8 24291.7 1052.39 25
 2 -2 -8 22083.9 541.071 35
 -2 2 8 22288 521.872 18
 -2 2 7 21207.4 930.124 2
 -2 2 7 20578.3 840.597 1
 2 -2 -7 19868.1 906.289 28
 -2 2 7 21260.3 927.644 26
 2 -2 -7 19824.4 898.952 25
 2 -2 -7 22007 843.049 27
 -2 2 6 76860.1 1607.07 2
 -2 2 6 76648.6 1489.31 1
 2 -2 -6 77656.2 1621.42 28
 -2 2 6 77603.4 1596.76 26
 2 -2 -6 76694.4 1609.43 25
 2 -2 -6 80421.4 1490.28 27
 2 -2 -5 33069.3 959.264 28
 -2 2 5 34657.6 829.031 30
 2 -2 -5 32861.5 962.584 25
 -2 2 5 32676 921.675 26
 -2 2 5 33505.4 897.503 1
 2 -2 -5 33745.5 877.898 27
 -2 2 5 32059 918.35 2
 -2 2 4 12412.6 507.595 2
 -2 2 4 11936 489.478 1
 2 -2 -4 13893.3 555.68 28
 -2 2 4 12948.9 513.645 26
 2 -2 -4 11871.1 530.657 25
 -2 2 4 12439.6 483.321 30
 -2 2 4 13048.5 318.665 5
 2 -2 -4 11926 474.793 27
 2 -2 -4 10430.2 448.146 31
 -2 2 3 2353.35 208.676 30
 2 -2 -3 2399.11 214.178 28
 2 -2 -3 2269.94 196.417 27
 -2 2 3 2230.79 201.049 1
 2 -2 -3 2757.91 248.611 25
 -2 2 3 2144.46 92.4196 5
 -2 2 3 2222.82 196.974 2
 2 -2 -2 83985.8 1040.82 27
 -2 2 2 83421.3 1003.93 2
 -2 2 2 84133.6 1097.76 1
 -2 2 2 84813.4 1123.78 30
 2 -2 -2 86408.7 1156.19 25
 -2 2 1 67713.1 948.029 30
 -2 2 1 68774.6 815.78 2
 2 -2 -1 68996.4 737.195 29
 2 -2 -1 67948.5 901.843 27
 -2 2 1 68355 943.219 1
 2 -2 -1 67967.3 488.86 6
 2 -2 -1 68211.7 926.933 25
 -2 2 0 8873.71 341.705 30
 2 -2 0 9090.22 307.895 29
 -2 2 0 9144.33 296.507 2
 -2 2 0 9350.2 343.369 1
 2 -2 0 9354.39 344.48 27
 2 -2 0 9114.64 318.681 25
 2 -2 1 42018.1 772.138 27
 2 -2 1 42300.6 664.285 26
 -2 2 -1 40852.6 747.953 1
 2 -2 1 40289.3 822.689 29
 -2 2 -2 5998.72 313.116 4
 -2 2 -2 6035.38 290.075 28
 -2 2 -2 5766.53 308.677 1
 2 -2 2 5708.88 348.035 26
 2 -2 2 6721.87 338.373 27
 2 -2 2 5920.42 396.532 29
 -2 2 -2 6208.79 300.165 30
 2 -2 3 12786.7 604.723 26
 -2 2 -3 13249.4 482.104 28
 -2 2 -3 13343.2 494.93 4
 -2 2 -3 13152 515.624 3
 2 -2 3 13442.5 641.803 29
 2 -2 4 282.829 170.951 29
 -2 2 -4 522.923 139.774 28
 -2 2 -4 263.54 91.5927 4
 -2 2 -4 367.663 109.522 3
 2 -2 4 234.797 169.116 26
 2 -2 4 476.394 89.5098 31
 -2 2 -5 191.791 90.5751 4
 2 -2 5 168.357 125.672 29
 -2 2 -5 95.6357 93.3197 28
 -2 2 -5 102.49 85.2598 3
 -2 2 -5 214.471 93.7262 25
 2 -2 6 20342.6 933.967 26
 2 -2 6 20236.9 902.968 29
 -2 2 -6 19090.9 821.762 28
 -2 2 -6 21207.1 808.616 4
 -2 2 -6 20060.5 840.742 3
 -2 2 -7 3396.86 389.735 28
 2 -2 7 3556.15 423.826 26
 -2 2 -7 3959.2 370.688 4
 -2 2 -7 3795.59 385.024 3
 2 -2 7 3537.4 414.416 29
 2 -2 8 2697.49 386.533 29
 2 -2 8 2564.38 386.768 26
 2 -2 8 2791.9 191.415 24
 -2 2 -8 2643.58 179.041 39
 2 -2 8 2170.52 361.746 2
 2 -2 8 2666.35 181.786 38
 -2 2 -8 2682.48 184.92 12
 -2 2 -8 2210.56 328.011 3
 -2 2 -8 2353.46 342.315 28
 -2 2 -8 2578.44 175.802 35
 2 -2 8 2562.97 181.077 23
 2 -2 8 2629.68 185.541 37
 2 -2 9 9306.02 352.305 23
 2 -2 9 9579.4 360.169 24
 -2 2 -9 9347.03 349.274 12
 2 -2 9 9287.68 355.133 37
 -2 2 -9 10122 355.183 39
 -2 2 -9 10322.7 353.324 35
 2 -2 9 10097.7 359.935 38
 2 -2 10 1609.8 150.493 24
 2 -2 10 1837.07 160.794 23
 -2 2 -10 1735.73 152.029 35
 2 -2 10 1732.59 155.235 37
 -2 2 -10 1857.11 156.233 39
 2 -2 10 1770.64 154.39 38
 -2 2 -10 1943.04 166.441 12
 -2 2 -10 1842.63 154.107 34
 2 -2 11 1980.58 151.416 38
 2 -2 11 1945.86 155.053 24
 2 -2 11 1864.46 152.354 37
 -2 2 -11 2049.06 144.303 35
 -2 2 -11 1927.27 143.455 39
 2 -2 11 1644.08 139.56 23
 -2 2 -11 1976.11 156.941 12
 -2 2 -11 2111.31 144.296 34
 2 -2 11 2048.32 151.046 17
 2 -2 12 1286.52 106.781 37
 -2 2 -12 1299.47 110.124 12
 2 -2 12 1244.95 105.057 24
 -2 2 -12 1300.24 95.9875 39
 -2 2 -12 1196.81 91.7464 35
 2 -2 12 1221.67 102.41 38
 2 -2 12 1172.15 93.446 17
 2 -2 13 216.406 31.7769 37
 -2 2 -13 216.559 37.1765 12
 2 -2 13 146.898 27.1399 38
 2 -1 -14 195.033 30.4561 35
 -2 1 14 163.75 27.1868 24
 2 -1 -13 25.677 28.6916 12
 -2 1 13 -62.3205 44.3956 38
 -2 1 13 -2.00539 39.7291 24
 2 -1 -13 -3.17718 32.4127 39
 2 -1 -13 -8.33397 41.5608 35
 -2 1 13 109.352 42.0533 37
 -2 1 12 43.1124 44.2202 37
 2 -1 -12 -45.5705 44.2099 12
 -2 1 12 -26.1774 50.5907 24
 -2 1 12 -12.6415 35.9818 23
 2 -1 -12 -1.4775 56.0322 35
 2 -1 -12 -33.4592 43.5501 39
 -2 1 12 6.09234 53.7873 38
 2 -1 -11 76.5936 61.6325 35
 -2 1 11 105.565 70.8673 24
 -2 1 11 168.914 58.9715 23
 -2 1 11 93.4208 55.9892 37
 -2 1 11 62.7065 62.8617 38
 2 -1 -11 70.1516 62.5079 39
 -2 1 10 14555.4 441.939 24
 -2 1 10 15090.4 432.117 23
 -2 1 10 14193.8 432.014 38
 -2 1 10 14845.8 435.234 37
 2 -1 -10 14762.7 440.891 39
 2 -1 -10 14025.6 432.132 35
 -2 1 10 14030.1 422.497 18
 2 -1 -10 13490.7 421.631 10
 2 -1 -9 377.533 85.033 35
 -2 1 9 385.085 77.0342 38
 -2 1 9 476.686 184.341 26
 -2 1 9 477.353 87.612 24
 -2 1 9 263.81 56.0634 23
 -2 1 9 442.294 146.759 1
 -2 1 9 70.9404 71.9516 2
 -2 1 9 341.626 68.0669 37
 2 -1 -9 228.109 133.077 28
 2 -1 -9 440.504 82.2038 10
 -2 1 9 274.036 73.6064 18
 2 -1 -9 355.364 80.4849 39
 2 -1 -8 8120 617.548 28
 -2 1 8 8075.89 577.006 1
 -2 1 8 8058.05 610.494 26
 -2 1 8 7890.21 589.722 2
 2 -1 -8 8248.19 569.351 25
 2 -1 -7 476.211 154.097 28
 -2 1 7 667.988 178.54 26
 2 -1 -7 965.275 197.763 25
 -2 1 7 680.7 181.54 2
 -2 1 7 544.544 151.843 1
 2 -1 -7 816.229 175.654 3
 -2 1 6 514.557 131.966 30
 2 -1 -6 379.608 148.411 28
 2 -1 -6 585.664 143.265 27
 -2 1 6 750.371 170.401 26
 -2 1 6 530.767 147.136 1
 -2 1 6 575.06 142.549 2
 2 -1 -6 390.658 128.545 25
 2 -1 -6 453.427 131.003 3
 2 -1 -5 2589.1 166.23 31
 -2 1 5 2326.4 242.494 1
 2 -1 -5 2504.49 273.805 28
 2 -1 -5 2197.04 195.36 27
 -2 1 5 2194.87 241.659 26
 2 -1 -5 2187.83 235.051 25
 -2 1 5 2215.27 230.873 30
 -2 1 5 2427.59 235.641 2
 2 -1 -5 2732.82 265.255 3
 2 -1 -4 3791.7 227.092 27
 -2 1 4 3528.96 265.655 1
 -2 1 4 3545.09 245.169 2
 2 -1 -4 3904.59 280.595 3
 -2 1 4 3692.55 262.941 26
 2 -1 -4 3791.51 286.466 28
 2 -1 -4 3749.25 275.56 25
 -2 1 4 3801.73 276.908 30
 2 -1 -4 3850.68 224.73 31
 -2 1 3 41765.5 808.328 30
 -2 1 3 42432.3 795.192 1
 -2 1 3 40997.3 696.812 26
 2 -1 -3 41881.7 803.569 28
 2 -1 -3 40839.1 647.236 27
 2 -1 -3 41729.5 806.133 25
 -2 1 3 40155.3 666.584 2
 2 -1 -3 40265.6 771.678 31
 2 -1 -2 743.1 50.245 29
 -2 1 2 725.495 111.044 1
 2 -1 -2 772.656 93.5227 27
 -2 1 2 709.996 75.382 2
 -2 1 2 704.877 117.22 30
 -2 1 2 751.042 78.0428 26
 2 -1 -2 677.852 110.704 25
 2 -1 -2 668.819 153.938 31
 2 -1 -1 72550.7 802.325 27
 2 -1 -1 72892.7 613.941 29
 -2 1 1 76141.3 586.1 2
 2 -1 -1 75604 681.837 6
 2 -1 -1 77077.2 532.051 5
 -2 1 1 71900.4 940.057 30
 2 -1 -1 70834.3 884.983 25
 -2 1 1 74775.2 900.194 1
 -2 1 0 48822.9 726.688 30
 2 -1 0 49692.4 727.633 27
 2 -1 0 50219.4 576.248 6
 2 -1 0 50294.4 738.946 29
 2 -1 1 10325.9 370.835 27
 -2 1 -1 10375.1 317.893 30
 2 -1 1 10396.4 339.269 26
 -2 1 -1 10692.9 342.378 4
 2 -1 1 10134.5 413.741 29
 -2 1 -1 10119.8 344.414 1
 -2 1 -2 26900.5 502.561 30
 2 -1 2 27082.3 737.858 29
 -2 1 -2 26561.9 572.4 4
 2 -1 2 28371.1 700.356 26
 2 -1 2 25786.5 601.66 31
 -2 1 -2 26729.4 647.284 28
 -2 1 -3 69527.8 1014.82 4
 -2 1 -3 69915.7 1126.98 3
 -2 1 -3 67764 1165.17 28
 2 -1 3 75034.2 910.393 31
 2 -1 3 73204.1 1319.05 29
 2 -1 3 75539.1 1291.44 26
 2 -1 4 11722.9 583.422 29
 -2 1 -4 11212.6 540.91 28
 -2 1 -4 11336.5 454.621 4
 2 -1 4 12468.9 595.406 26
 -2 1 -4 10875.3 476.584 25
 -2 1 -4 11127.1 499.69 3
 2 -1 5 14026.5 695.926 29
 -2 1 -5 13607.7 652.584 28
 -2 1 -5 15070.2 582.91 4
 2 -1 5 15476.8 713.094 26
 -2 1 -5 14992.5 607.847 25
 -2 1 -5 15207.6 640.495 3
 2 -1 6 7181.59 539.03 29
 2 -1 6 8283.65 575.256 26
 -2 1 -6 8065.34 464.682 4
 -2 1 -6 8212.14 487.809 25
 -2 1 -6 6696.34 513.291 28
 -2 1 -6 7790.97 501.354 3
 2 -1 6 7081.34 548.827 2
 -2 1 -7 177.936 111.132 28
 2 -1 7 -10.1216 128.362 2
 2 -1 8 2216.48 340.991 5
 2 -1 8 2333.39 172.693 37
 2 -1 8 2036.46 154.343 20
 -2 1 -8 2292.47 340.413 28
 2 -1 8 2082.76 168.883 24
 2 -1 8 1673.41 301.199 26
 2 -1 8 2174.71 168.372 38
 2 -1 8 2090.55 359.233 2
 -2 1 -8 2171.29 166.799 12
 -2 1 -8 1984.52 156.17 39
 2 -1 8 2116.77 169.702 23
 -2 1 -8 2111.05 159.98 35
 2 -1 9 845.518 121.342 24
 2 -1 9 1131.39 130.605 37
 -2 1 -9 971.236 115.296 39
 2 -1 9 830.266 117.021 23
 2 -1 9 990.902 123.522 38
 -2 1 -9 806.257 114.729 12
 -2 1 -9 1068.65 120.436 35
 2 -1 10 1161.75 127.926 38
 2 -1 10 980.336 125.203 24
 2 -1 10 1003.8 125.181 23
 -2 1 -10 1262.87 125.849 34
 -2 1 -10 1226.12 135.625 12
 2 -1 10 1080.51 122.508 37
 -2 1 -10 1178.62 119.69 35
 -2 1 -10 1222.38 120.66 39
 2 -1 11 776.847 100.071 24
 2 -1 11 857.001 106.36 23
 -2 1 -11 775 88.4291 34
 2 -1 11 855.04 103.203 38
 2 -1 11 956.824 95.7382 17
 -2 1 -11 819.948 87.9926 35
 -2 1 -11 826.008 88.2863 39
 -2 1 -11 913.535 110.793 12
 2 -1 11 938.891 106.864 37
 2 -1 12 166.997 48.754 24
 2 -1 12 119.848 42.4952 38
 2 -1 12 171.065 45.6168 37
 -2 1 -12 156.546 51.4624 12
 -2 0 14 1185.23 71.8369 37
 -2 0 14 1523.67 89.9377 38
 -2 0 14 1351.25 84.2745 24
 2 0 -14 1411.69 86.8672 39
 2 0 -14 1414.53 88.798 35
 2 0 -13 95.0398 49.2352 39
 -2 0 13 57.8599 50.3166 24
 2 0 -13 92.8205 36.7486 12
 -2 0 13 133.26 52.8449 37
 2 0 -13 43.2534 49.5751 35
 -2 0 13 80.3332 49.8226 38
 -2 0 12 22.7817 64.5233 38
 -2 0 12 -23.9394 58.47 24
 -2 0 12 77.1742 53.1441 37
 2 0 -12 -21.3581 54.8882 35
 2 0 -12 69.4012 38.9599 12
 2 0 -12 -45.9168 66.4069 39
 2 0 -11 760.791 115.269 35
 -2 0 11 772.353 116.241 24
 -2 0 11 869.408 119.686 37
 2 0 -11 852.906 115.599 39
 -2 0 11 761.314 114.819 38
 -2 0 10 695.977 199.434 26
 2 0 -10 440.586 82.8778 35
 2 0 -10 506.24 96.9326 10
 -2 0 10 531.162 95.9495 24
 -2 0 10 836.008 227.191 1
 -2 0 10 539.13 94.4167 38
 -2 0 10 553.695 86.1907 18
 2 0 -10 632.06 103.359 39
 2 0 -10 646.962 250.838 28
 -2 0 10 528.836 93.8885 37
 2 0 -9 -111.689 57.7073 35
 2 0 -9 129.425 89.3293 28
 -2 0 9 -142.63 123.886 26
 -2 0 9 -105.521 71.2663 1
 -2 0 9 327.449 179.625 2
 2 0 -9 14.4323 48.9741 10
 2 0 -9 134.704 47.6521 39
 -2 0 9 -112.477 54.9266 24
 -2 0 9 3.71071 43.1417 38
 2 0 -9 -483.187 180.746 3
 -2 0 8 6607.95 541.437 26
 -2 0 8 7572.64 565.335 1
 -2 0 8 7460.75 545.955 2
 2 0 -8 7371.36 566.669 28
 2 0 -8 7451.12 562.823 3
 -2 0 7 33.3649 100.45 30
 -2 0 7 -51.3591 114.176 1
 -2 0 7 163.31 153.711 26
 2 0 -7 -129.09 84.7781 25
 -2 0 7 6.83442 44.7348 2
 2 0 -7 78.761 97.3757 28
 2 0 -7 173.53 137.8 3
 2 0 -6 9152.64 519.059 28
 2 0 -6 8903.53 514.689 3
 -2 0 6 8607.04 500.001 1
 -2 0 6 8601.39 531.173 26
 2 0 -6 9192.51 469.68 25
 -2 0 6 9117.31 489.225 30
 -2 0 6 9014.86 478.621 2
 2 0 -5 11843 528.299 28
 2 0 -5 12285.7 355.9 27
 -2 0 5 12045.6 571.178 26
 2 0 -5 10817.7 458.499 25
 2 0 -5 11733.6 531.676 3
 -2 0 5 11890.3 471.964 2
 -2 0 5 12025.2 511.972 30
 2 0 -5 11980.6 370.873 31
 2 0 -4 57388.6 1025.87 28
 2 0 -4 57596.6 628.83 27
 2 0 -4 57876.8 831.043 31
 -2 0 4 59894.7 1117.16 26
 2 0 -4 56669.4 944.461 25
 2 0 -4 58519.1 1057.98 3
 -2 0 4 58083.4 665.806 29
 -2 0 4 59082.2 1048.72 1
 -2 0 4 56490.5 846.828 2
 -2 0 3 12999.8 458.874 30
 -2 0 3 13680.2 467.285 26
 2 0 -3 13482.2 254.038 27
 2 0 -3 13849 426.859 25
 2 0 -3 13229.5 403.129 31
 2 0 -3 14133.9 467.182 3
 -2 0 3 13745.1 451.377 1
 -2 0 3 13542.3 318.796 2
 -2 0 2 318846 2025.64 30
 2 0 -2 312387 1913.51 25
 2 0 -2 320687 1969.04 31
 -2 0 2 312599 1895.71 1
 2 0 -2 329384 1303.15 27
 2 0 -1 148694 1056.28 27
 2 0 -1 146805 1216.62 6
 -2 0 1 150143 603.67 26
 -2 0 1 143583 1183.61 1
 2 0 -1 151715 1354.77 31
 -2 0 1 144624 1293.65 30
 2 0 -1 148079 1079.08 5
 2 0 0 86999.4 1021.9 31
 2 0 0 83017.6 962.115 6
 -2 0 0 88839.2 857.738 1
 2 0 0 83142.5 841.221 29
 -2 0 0 84667.4 917.046 30
 2 0 0 80770.9 921.161 5
 -2 0 -1 82600.8 811.844 30
 -2 0 -1 81167.7 728.512 4
 -2 0 -1 80047 850.51 1
 2 0 1 83237.3 892.644 26
 2 0 1 80721.4 1061.97 29
 2 0 2 8979.48 330.047 31
 -2 0 -2 9385.8 225.239 30
 -2 0 -2 9405.54 420.53 28
 2 0 2 9576.1 385.218 26
 -2 0 -2 8774.62 270.463 4
 2 0 2 9658.87 423.613 29
 2 0 3 2043.95 246.652 29
 -2 0 -3 1719.6 143.425 4
 -2 0 -3 1730.02 224.13 28
 2 0 3 1691.45 139.144 31
 -2 0 -3 1752.44 165.92 3
 2 0 3 1767.57 208.392 26
 -2 0 -4 17956.3 718.745 28
 2 0 4 20049.1 737.861 26
 2 0 4 19093 758.709 29
 -2 0 -4 20419.2 565.494 4
 2 0 4 18600.5 737.912 2
 -2 0 -4 20601.3 731.527 25
 -2 0 -4 19876.7 615.81 3
 -2 0 -5 496.659 136.917 28
 2 0 5 889.965 186.967 26
 -2 0 -5 711.465 150.581 25
 2 0 5 586.127 188.184 2
 -2 0 -5 828.811 142.393 3
 -2 0 -6 6505.69 527.47 28
 2 0 6 6673.1 528.24 26
 -2 0 -6 7893.47 525.266 25
 2 0 6 7145.18 551.039 5
 2 0 6 6927.15 563.998 2
 -2 0 -7 4115.49 458.388 28
 2 0 7 4389.97 461.13 26
 2 0 7 4510.03 234.808 24
 2 0 7 4663.95 241.2 23
 2 0 7 4433.66 230.679 37
 2 0 7 4239.44 479.25 2
 2 0 7 4985.33 246.902 38
 2 0 7 4151.12 450.997 5
 2 0 8 293.788 148.237 5
 2 0 8 350.251 77.8139 38
 -2 0 -8 698.304 214.288 28
 -2 0 -8 505.834 85.9937 35
 2 0 8 77.0736 64.4 26
 2 0 8 406.76 87.8884 24
 2 0 8 450.624 91.6931 23
 2 0 8 106.908 158.29 2
 -2 0 -8 469.035 78.8091 39
 -2 0 -8 381.03 80.165 12
 2 0 8 570.612 92.3342 37
 2 0 8 392.189 82.6618 20
 2 0 9 -46.0709 45.0169 37
 2 0 9 -46.4565 52.7961 24
 -2 0 -9 -12.9544 51.1461 12
 2 0 9 -84.171 56.0106 23
 2 0 9 -29.6332 54.0466 38
 -2 0 -9 56.1477 39.0527 39
 -2 0 -9 18.4196 47.0583 35
 2 0 9 36.4234 44.6384 20
 -2 0 -10 -17.5733 38.3494 39
 2 0 10 23.2572 61.4601 23
 -2 0 -10 51.7775 45.5185 35
 2 0 10 32.3438 43.2206 37
 2 0 10 97.5148 63.7395 24
 -2 0 -10 97.1163 69.0379 12
 2 0 10 0.82261 58.9259 38
 2 0 11 584.422 74.344 37
 -2 0 -11 544.907 60.8557 35
 2 0 11 570.342 85.6348 24
 2 0 11 587.158 86.1816 23
 2 0 11 566.57 85.7657 38
 -2 0 -11 471.01 80.0495 12
 -2 0 -11 493.261 72.4478 34
 2 0 12 234.628 45.2281 38
 -2 0 -12 260.958 50.0879 12
 2 1 -14 -14.1509 32.9359 39
 2 1 -14 33.1535 38.2215 35
 -2 -1 14 12.2221 22.7045 24
 -2 -1 14 -3.42386 30.3646 37
 -2 -1 14 -55.6973 35.1913 38
 -2 -1 13 673.47 86.1645 24
 -2 -1 13 646.098 88.1662 38
 -2 -1 13 701.402 96.2044 37
 2 1 -13 671.352 92.6812 39
 2 1 -13 731.392 97.4861 35
 -2 -1 12 1133.1 127.277 24
 2 1 -12 1193.16 114.806 13
 2 1 -12 1089.07 128.522 35
 2 1 -12 1216.72 110.547 12
 2 1 -12 1074.86 126.194 39
 -2 -1 12 1245.89 132.765 38
 -2 -1 12 977.152 120.093 37
 -2 -1 11 1840.92 161.357 24
 2 1 -11 1646.82 157.74 10
 2 1 -11 1919.64 146.413 12
 -2 -1 11 1673.5 153.429 38
 -2 -1 11 1695.34 155.665 37
 2 1 -11 1630.17 151.917 39
 2 1 -11 1779.66 160.429 35
 2 1 -10 15201 899.638 28
 2 1 -10 12918.4 837.823 3
 -2 -1 10 13787.9 420.566 24
 2 1 -10 14233.8 427.462 39
 -2 -1 10 12751.9 400.903 38
 -2 -1 10 14197.9 899.343 26
 -2 -1 10 13405.2 416.323 37
 -2 -1 10 13648 833.932 1
 2 1 -10 13328.4 409.055 35
 2 1 -10 13873.8 433.408 10
 -2 -1 9 1017.09 267.209 26
 -2 -1 9 1025.1 118.329 24
 -2 -1 9 996.642 222.156 2
 2 1 -9 1029.63 114.741 39
 -2 -1 9 1102.68 118.141 38
 2 1 -9 1280.74 252.475 28
 2 1 -9 1248.36 126.908 10
 2 1 -9 1090.68 117.877 35
 2 1 -9 1198.55 259.579 3
 -2 -1 9 946.299 221.71 1
 -2 -1 8 594.416 152.936 2
 2 1 -8 927.866 214.549 28
 -2 -1 8 789.646 247.322 26
 2 1 -8 753.744 196.955 3
 -2 -1 7 7923.37 497.024 30
 2 1 -7 7869.44 519.802 28
 -2 -1 7 8531.52 608.579 26
 -2 -1 7 7769.91 486.484 2
 2 1 -7 8025.73 539.072 3
 2 1 -6 2864.14 235.279 25
 -2 -1 6 3406.42 247.979 29
 2 1 -6 3390.56 301.394 28
 -2 -1 6 2675.93 338.085 26
 -2 -1 6 2881.13 281.702 30
 2 1 -6 2669.27 297.911 3
 -2 -1 5 25653.1 762.005 30
 2 1 -5 25798.8 747.124 28
 -2 -1 5 23773.8 895.334 26
 2 1 -5 25803.8 791.488 3
 2 1 -5 26154.2 648 25
 -2 -1 4 1990.53 221.535 30
 -2 -1 4 1438.21 227.157 26
 2 1 -4 1670.69 204.681 6
 2 1 -4 1732.77 199.643 3
 2 1 -4 1922.2 179.659 31
 -2 -1 4 2027.07 166.693 29
 2 1 -4 1854.91 164.041 25
 -2 -1 3 50572.8 878.377 26
 2 1 -3 49820.1 882.746 3
 2 1 -3 49404 900.065 6
 2 1 -3 50424.2 854.476 31
 -2 -1 3 51670.5 612.478 29
 -2 -1 2 87991.4 860.19 26
 2 1 -2 86572.3 1026.43 3
 2 1 -2 83970.4 972.653 5
 2 1 -2 85224.4 1102.21 31
 2 1 -1 970934 3726.52 31
 -2 -1 1 964193 3370.14 30
 -2 -1 1 960778 2818.36 1
 2 1 0 50224.9 696.792 2
 2 1 0 51151.8 891.418 6
 -2 -1 0 51563.8 721.005 30
 -2 -1 0 53275.6 572.827 1
 2 1 0 53473.5 900.722 5
 2 1 0 52555.7 868.048 31
 2 1 1 7683.28 342.161 31
 -2 -1 -1 7829.35 369.33 28
 -2 -1 -1 8068.03 251.453 30
 2 1 1 7268.38 376.336 5
 2 1 1 7256.93 329.059 2
 -2 -1 -2 1111.48 174.469 28
 -2 -1 -2 1339.22 107.205 3
 2 1 2 1194.35 193.257 5
 2 1 2 1218.27 171.777 2
 2 1 3 1481.37 229.405 5
 2 1 3 1528.62 214.177 2
 2 1 3 1281.64 194.734 26
 -2 -1 -3 1212.67 198.301 25
 -2 -1 -3 1485.02 132.578 3
 -2 -1 -3 1122.86 198.763 28
 -2 -1 -4 6366.21 459.483 25
 -2 -1 -4 7099.31 484.599 28
 2 1 4 6124.66 452.841 2
 2 1 4 6569.06 459.787 26
 2 1 4 6191.86 465.912 5
 -2 -1 -5 5888.27 487.464 28
 2 1 5 5084.31 445.063 26
 2 1 5 5248.22 464.918 5
 2 1 5 4217.79 423.282 2
 -2 -1 -5 5115.43 433.789 25
 -2 -1 -6 710.66 175.164 25
 2 1 6 -101.608 136.785 2
 -2 -1 -6 510.265 188.154 28
 2 1 6 139.959 116.273 5
 -2 -1 -7 5678.36 557.297 28
 2 1 7 5232.25 264.822 18
 -2 -1 -7 5151.8 481.761 25
 2 1 7 5254.26 258.616 24
 2 1 7 5510.51 267.825 23
 2 1 7 5444.44 255.837 37
 2 1 7 5471.87 263.536 38
 2 1 7 5499.27 556.855 2
 -2 -1 -7 5290.63 247.174 35
 2 1 7 5326.01 533.571 5
 2 1 7 5487.44 264.662 20
 2 1 8 15410.3 457.437 23
 2 1 8 16789 442.224 14
 2 1 8 15485.6 447.279 24
 2 1 8 15737.6 448.452 20
 2 1 8 16458.9 445.621 37
 -2 -1 -8 16543.1 432.937 35
 2 1 8 16192.6 460.963 38
 2 1 9 419.101 85.6381 38
 -2 -1 -9 359.895 66.4617 35
 2 1 9 287.282 71.8939 24
 2 1 9 315.475 92.0731 23
 -2 -1 -9 334.816 81.96 12
 2 1 9 349.962 76.4783 20
 2 1 9 407.593 75.8787 14
 2 1 9 354.418 69.2335 37
 -2 -1 -10 -77.7381 34.0348 35
 2 1 10 -12.1565 45.3529 24
 2 1 10 59.5022 40.684 20
 2 1 10 31.6327 51.4943 38
 2 1 10 75.5904 39.3242 37
 2 1 10 45.771 37.2706 21
 2 1 10 13.6989 61.4746 23
 -2 -1 -10 -26.1727 53.0824 12
 2 1 11 1012.27 101.081 23
 2 1 11 1065.61 96.6396 24
 -2 -1 -11 968.455 92.0726 12
 -2 -1 -11 862.718 76.7267 34
 2 1 11 1007.07 96.7927 38
 2 1 12 436.927 43.2374 38
 -2 -1 -12 424.297 43.2864 12
 -2 -2 14 102.946 33.719 24
 2 2 -14 124.995 45.6697 39
 -2 -2 14 92.3499 32.9509 38
 -2 -2 14 59.0645 39.3422 37
 2 2 -14 59.9074 42.3197 35
 2 2 -13 26.3312 58.654 39
 -2 -2 13 107.496 46.6621 24
 2 2 -13 93.8411 43.5647 13
 -2 -2 13 84.1494 43.5284 38
 -2 -2 13 12.5476 53.5613 37
 2 2 -13 7.35979 56.0473 35
 -2 -2 12 6302.03 271.133 24
 2 2 -12 6469.46 268.377 13
 -2 -2 12 5686.34 261.691 38
 -2 -2 12 5905.27 275.026 37
 2 2 -12 5816.9 269.306 35
 2 2 -12 6105.25 277.068 39
 2 2 -11 3091.66 205.906 39
 -2 -2 11 3163.34 202.123 24
 2 2 -11 2869.33 195.799 13
 -2 -2 11 3002.25 199.858 38
 2 2 -11 2726.32 200.488 10
 -2 -2 11 2801.71 200.734 37
 2 2 -11 2657.52 191.609 35
 -2 -2 10 646.798 102.206 37
 -2 -2 10 603.853 94.7934 24
 2 2 -10 711.379 207.391 6
 -2 -2 10 402.57 172.03 1
 -2 -2 10 647.667 220.315 26
 -2 -2 10 507.682 89.9263 38
 2 2 -10 572.086 90.7996 39
 2 2 -10 682.155 100.146 35
 2 2 -10 552.945 94.6863 10
 2 2 -10 773.739 219.712 3
 2 2 -10 634.843 92.5667 36
 2 2 -9 68.2682 157.338 6
 -2 -2 9 -132.55 87.7441 2
 2 2 -9 50.6674 31.5476 39
 2 2 -9 -2.66777 28.5766 10
 -2 -2 9 -161.252 144.422 26
 2 2 -9 -46.0941 36.3245 35
 2 2 -8 1490.29 238.639 28
 -2 -2 8 1118.24 300.436 26
 2 2 -8 638.825 182.04 3
 -2 -2 8 984.852 199.822 2
 -2 -2 8 1186.89 207.071 30
 -2 -2 7 6342.27 468.356 30
 -2 -2 7 5793.08 573.324 26
 2 2 -7 6673.98 501.606 3
 -2 -2 6 10692.9 509.029 29
 -2 -2 6 8586.4 646.28 26
 2 2 -6 9597.24 551.668 6
 2 2 -6 9759.9 553.766 3
 -2 -2 5 1140.99 226.72 26
 2 2 -5 1260.17 201.955 6
 2 2 -5 1397.71 198.468 3
 -2 -2 5 1328.07 176.442 29
 -2 -2 4 32594.3 688.488 29
 2 2 -4 31894.6 848.395 6
 -2 -2 4 32647 852.839 26
 2 2 -4 31679.5 804.888 3
 -2 -2 3 105504 1081.02 29
 -2 -2 3 101523 1234.8 26
 2 2 -3 107753 1442.55 6
 2 2 -3 103474 1298.16 3
 2 2 -3 105313 1326.61 5
 2 2 -2 203492 1338.06 2
 2 2 -2 199056 1830.62 5
 2 2 -2 206635 1564.49 3
 -2 -2 2 195514 1514.13 1
 2 2 -2 202101 1929.44 6
 2 2 -1 7642.6 386.89 5
 -2 -2 1 8228.81 245.186 1
 2 2 -1 7787.57 287.732 2
 2 2 -1 8258.53 398.38 6
 2 2 0 9922.07 378.35 2
 -2 -2 0 9945.97 405.338 28
 2 2 0 10105 461.614 5
 2 2 0 9309.15 446.324 6
 -2 -2 -1 3203.42 169.529 30
 -2 -2 -1 2641.38 239.596 28
 2 2 1 2750.09 238.12 2
 2 2 1 2530.06 264.432 5
 2 2 2 1025.62 190.312 5
 -2 -2 -2 1068.18 176.462 28
 2 2 2 1001.37 163.916 2
 -2 -2 -3 840.999 172.66 28
 2 2 3 723.291 172.099 5
 -2 -2 -3 886.733 206.266 25
 2 2 3 1123.63 193.31 2
 -2 -2 -4 19909.1 860.895 25
 -2 -2 -4 18789.7 826.441 28
 2 2 4 18625.5 850.791 5
 2 2 4 18340.4 828.63 2
 2 2 5 -118.041 135.8 2
 -2 -2 -5 86.6965 91.6415 25
 -2 -2 -5 10.2489 111.44 28
 2 2 5 48.0726 126.549 5
 -2 -2 -6 530.168 164.611 28
 2 2 6 492.695 84.8937 24
 2 2 6 479.139 79.9291 23
 2 2 6 387.627 162.135 2
 2 2 6 497.267 92.0822 20
 2 2 6 424.975 74.9905 38
 -2 -2 -6 382.051 137.273 25
 2 2 6 568.401 83.9644 18
 2 2 6 412.339 155.311 5
 -2 -2 -7 173.993 127.654 28
 2 2 7 297.591 83.1485 14
 2 2 7 162.718 170.125 5
 -2 -2 -7 616.865 198.81 25
 2 2 7 486.872 92.4401 24
 2 2 7 415.664 91.7982 23
 2 2 7 450.373 205.146 2
 2 2 7 578.576 94.0135 18
 2 2 7 356.68 81.571 38
 2 2 7 466.194 96.0966 20
 -2 -2 -8 448.543 77.2465 35
 2 2 8 114.647 59.43 14
 2 2 8 318.826 76.1423 24
 2 2 8 364.084 82.4551 23
 2 2 8 289.62 76.6477 20
 2 2 8 249.36 75.5462 38
 2 2 9 759.762 97.257 14
 2 2 9 820.267 106.062 24
 2 2 9 696.353 99.925 20
 2 2 9 728.483 97.9104 21
 -2 -2 -9 738.397 86.0815 35
 2 2 9 618.991 102.471 23
 2 2 9 784.088 104.144 38
 -2 -2 -9 669.564 100.851 12
 2 2 10 290.558 52.4391 14
 2 2 10 361.093 67.8355 24
 -2 -2 -10 256.135 63.2695 12
 2 2 10 390.77 80.8905 23
 2 2 10 291.049 62.1193 20
 2 2 10 327.574 66.1346 38
 2 2 10 412.711 64.9064 21
 2 2 11 117.742 43.0931 23
 2 2 11 87.1689 31.3185 38
 -2 -2 -11 88.2404 29.4883 34
 -2 -2 -11 92.3792 35.72 12
 2 3 -14 251.976 52.7295 39
 2 3 -14 181.684 52.3039 35
 2 3 -14 238.195 40.0355 13
 -2 -3 14 270.943 42.4196 38
 -2 -3 14 236.44 55.0059 37
 -2 -3 13 -46.3858 31.6167 24
 2 3 -13 -5.98211 44.779 39
 2 3 -13 87.8576 49.2529 13
 -2 -3 13 -7.18559 37.0444 38
 -2 -3 13 27.692 61.5035 37
 2 3 -13 12.9663 47.713 35
 2 3 -12 4640.84 238.997 13
 -2 -3 12 5095.26 229.066 24
 -2 -3 12 5167.65 247.022 38
 2 3 -12 4620.31 247.287 10
 2 3 -12 5181.31 254.064 39
 -2 -3 12 4851.71 252.73 37
 2 3 -12 4817.66 247.087 35
 2 3 -11 3294.35 211.242 35
 -2 -3 11 3674.85 204.981 24
 2 3 -11 3252.64 211.124 13
 -2 -3 11 3349.39 206.404 38
 -2 -3 11 3328.91 215.358 37
 2 3 -11 3257.13 210.319 10
 2 3 -11 3196.68 206.486 39
 -2 -3 10 -25.3877 45.9249 38
 -2 -3 10 275.268 183.788 1
 -2 -3 10 -54.2932 50.4508 37
 2 3 -10 48.9377 87.5735 6
 2 3 -10 18.1589 46.1922 35
 2 3 -10 51.263 42.6405 39
 2 3 -10 -176.16 103.306 3
 2 3 -10 78.9162 53.2097 10
 -2 -3 9 282.478 223.422 26
 2 3 -9 224.747 57.3061 39
 -2 -3 9 131.576 133.45 30
 2 3 -9 121.961 48.569 10
 2 3 -9 37.3721 37.2484 36
 2 3 -9 166.579 136.249 3
 2 3 -9 34.8647 42.8498 35
 2 3 -9 329.27 155.991 6
 -2 -3 8 488.875 217.186 26
 2 3 -8 571.684 185.846 3
 2 3 -8 194.628 121.183 6
 -2 -3 8 500.552 136.367 30
 -2 -3 7 5442.44 599.012 26
 2 3 -7 5909.12 484.408 3
 2 3 -7 5406.89 470.49 6
 -2 -3 6 1400.76 290.205 26
 2 3 -6 1627.7 230.597 3
 -2 -3 6 1861.21 250.545 29
 2 3 -6 1437.97 239.112 6
 -2 -3 5 1110.23 221.201 26
 2 3 -5 1103.45 180.704 4
 2 3 -5 1258.13 217.366 6
 2 3 -5 1052.66 184.658 3
 -2 -3 5 1168.31 169.357 29
 2 3 -4 56.8196 67.8111 4
 2 3 -4 -83.3611 71.828 3
 -2 -3 4 -105.231 78.1545 26
 2 3 -4 -144.394 119.787 6
 -2 -3 4 103.138 70.4857 29
 -2 -3 3 27041.5 438.23 27
 -2 -3 3 24611.7 644.064 29
 -2 -3 3 24761.4 697.635 26
 2 3 -3 25065.5 654.053 3
 2 3 -3 24121.5 773.631 6
 2 3 -3 25271.7 763.991 5
 2 3 -3 25579.2 661.911 4
 2 3 -2 43293.9 792.757 2
 -2 -3 2 47464 748.084 1
 2 3 -2 46429.3 1032.94 6
 2 3 -2 45059.8 1011.89 5
 -2 -3 2 45362.6 751.96 27
 2 3 -2 44993.9 736.567 3
 -2 -3 1 929.67 121.826 28
 2 3 -1 767.324 119.372 2
 -2 -3 1 674.95 65.3205 1
 2 3 -1 710.98 178.831 6
 2 3 -1 773.027 157.523 5
 2 3 0 788.287 173.658 6
 2 3 0 860.847 139.477 2
 2 3 0 707.554 160.893 5
 -2 -3 -1 3103.41 274.454 28
 2 3 1 3029.34 276.295 2
 -2 -3 -1 3002.03 304.657 25
 2 3 1 2698.23 298.274 5
 2 3 2 35546.1 1026.8 2
 -2 -3 -2 35807.1 1091.34 25
 2 3 2 35883.1 1095.31 5
 -2 -3 -2 34916 991.142 28
 -2 -3 -3 16217.1 741.053 28
 -2 -3 -3 16847.9 800.797 25
 2 3 3 16886.4 788.284 2
 2 3 3 16421.4 796.84 5
 -2 -3 -4 3320.79 389.413 25
 2 3 4 3790.63 415.143 5
 -2 -3 -4 3883.11 401.406 28
 2 3 4 3610.74 414.118 2
 2 3 5 2034.83 314.398 5
 -2 -3 -5 1791.19 295.98 28
 2 3 5 2154.25 168.457 20
 -2 -3 -5 2216.16 338.805 25
 2 3 5 1992.76 156.44 23
 2 3 5 2139.12 162.501 18
 2 3 5 1886.91 309.948 2
 2 3 5 2170.34 156.277 38
 2 3 6 293.001 136.442 2
 -2 -3 -6 541.737 177.126 25
 2 3 6 429.319 81.95 14
 2 3 6 547.905 86.3805 24
 2 3 6 462.6 97.3022 20
 2 3 6 416.957 77.8795 23
 -2 -3 -6 435.329 174.617 28
 2 3 6 439.532 83.4292 38
 2 3 6 424.5 77.979 18
 2 3 7 724.021 108.603 14
 2 3 7 847.715 114.996 23
 2 3 7 813.774 114.056 21
 2 3 7 713.467 114.08 20
 2 3 7 787.196 113.762 18
 2 3 7 832.63 107.119 24
 2 3 7 748.469 105.19 38
 2 3 8 414.251 74.4038 24
 2 3 8 280.193 80.4072 23
 2 3 8 341.728 86.3625 20
 2 3 8 408.703 86.8085 21
 2 3 8 328.318 83.0542 14
 2 3 8 434.542 79.3823 38
 -2 -3 -9 191.98 59.3971 12
 2 3 9 198.919 58.8909 14
 2 3 9 304.174 58.2582 24
 2 3 9 84.1511 56.1645 23
 2 3 9 190.51 58.6814 20
 2 3 9 184.14 55.9229 21
 2 3 9 164.733 54.1477 38
 2 3 10 523.753 59.5782 14
 2 3 10 600.121 65.625 38
 2 3 10 639.588 79.1042 23
 2 3 10 695.281 69.6052 20
 -2 -3 -10 591.346 68.4872 12
 2 3 10 586.439 64.2906 21
 2 4 -14 2001.94 109.974 13
 2 4 -14 2073.19 120.399 39
 -2 -4 14 1983.13 119.449 37
 2 4 -14 1987.31 122.791 35
 2 4 -13 1178.95 114.922 13
 -2 -4 13 1375.24 107.291 38
 -2 -4 13 1144.75 114.073 37
 2 4 -13 1391.32 127.889 35
 2 4 -13 1342.32 121.1 39
 2 4 -12 3864.38 219.339 10
 2 4 -12 4056.79 227.564 13
 2 4 -12 3809.05 219.21 35
 2 4 -12 3927.17 216.471 39
 -2 -4 12 4650.78 221.113 38
 -2 -4 12 4232.55 229.042 37
 2 4 -11 45.3872 47.432 10
 -2 -4 11 24.8798 48.8971 37
 2 4 -11 49.6208 61.2301 13
 2 4 -11 73.7305 49.7156 39
 2 4 -11 73.3948 64.3053 35
 -2 -4 11 -43.3752 47.443 38
 -2 -4 10 1820.94 405.05 26
 2 4 -10 1541.5 148.053 13
 2 4 -10 1600.6 148.11 10
 2 4 -10 2505.59 383.322 6
 -2 -4 10 1520.36 140.623 38
 2 4 -10 1589.63 150.818 35
 2 4 -10 1722.94 150.896 39
 2 4 -10 2167.41 407.095 3
 -2 -4 10 1821.56 157.712 37
 -2 -4 9 2258.11 326.542 30
 2 4 -9 2583.62 181.947 35
 2 4 -9 2627.14 182.27 13
 2 4 -9 2614.61 175.271 39
 -2 -4 9 2422.49 461.72 26
 2 4 -9 2638.97 181.436 10
 2 4 -9 2936.75 399.274 6
 2 4 -9 2217.23 384.661 3
 -2 -4 8 1217.96 314.752 26
 2 4 -8 1080.58 264.331 3
 2 4 -8 1254.33 248.721 6
 -2 -4 7 1624.69 357.514 26
 2 4 -7 1824.07 288.775 3
 2 4 -7 1666.77 278.505 6
 -2 -4 6 17217 778.844 29
 -2 -4 6 17234.1 900.509 26
 2 4 -6 17900.3 793.106 4
 2 4 -6 18184.9 794.545 3
 2 4 -6 17844.9 818.534 6
 -2 -4 5 8520.12 480.792 29
 -2 -4 5 7593.91 513.691 26
 2 4 -5 7640.51 476.536 3
 2 4 -5 7787.91 479.717 4
 2 4 -5 7624.96 506.794 6
 -2 -4 4 2735.61 255.422 29
 2 4 -4 2374.62 244.07 4
 2 4 -4 2357.94 277.756 6
 2 4 -4 2439.66 241.102 3
 -2 -4 4 2372.18 277.527 26
 -2 -4 3 30750.9 851.374 29
 -2 -4 3 31264.2 898.388 26
 2 4 -3 33545.9 794.508 4
 -2 -4 3 34105 662.015 27
 2 4 -3 31711 962.156 5
 2 4 -3 33531.7 770.929 3
 2 4 -3 30581.9 946.649 6
 2 4 -2 1117.22 202.19 5
 -2 -4 2 1222.06 133.13 28
 2 4 -2 1338.77 168.128 2
 2 4 -2 1279.5 217.018 6
 -2 -4 2 1116.17 144.624 27
 -2 -4 1 27255.8 690.954 28
 -2 -4 1 24593.3 738.6 27
 2 4 -1 25605.3 767.445 2
 2 4 -1 24555.4 896.019 5
 2 4 -1 25703.2 875.751 6
 -2 -4 0 1824.29 254.374 25
 2 4 0 2040.08 236.094 2
 2 4 0 2156.69 283.842 5
 -2 -4 0 1726.59 197.445 28
 2 4 1 5697.5 465.791 5
 -2 -4 -1 6407.05 412.003 28
 -2 -4 -1 6469.33 477.46 25
 2 4 1 6075.82 440.689 2
 -2 -4 -2 289.013 115.445 28
 -2 -4 -2 495.428 178.34 25
 2 4 2 200.211 123.054 5
 -2 -4 -3 6640.66 501.1 28
 2 4 3 7785.3 585.009 2
 2 4 3 7455.1 584.758 5
 -2 -4 -3 7045.39 558.45 25
 2 4 4 -25.5087 46.4241 5
 -2 -4 -4 42.3321 71.7878 25
 2 4 4 70.6939 41.1968 20
 2 4 4 10.6297 60.1677 11
 -2 -4 -4 174.274 124.195 28
 2 4 4 212.381 109.33 2
 2 4 4 -92.9224 45.9788 14
 2 4 4 50.2741 25.5748 23
 2 4 4 63.9104 45.888 21
 2 4 5 27.5877 42.7948 14
 2 4 5 58.0453 42.4183 18
 2 4 5 -68.8865 39.4879 23
 -2 -4 -5 -97.5927 82.2695 25
 2 4 5 231.282 125.666 5
 2 4 5 55.5734 48.762 21
 2 4 5 65.1153 59.7267 20
 2 4 5 276.845 133.575 2
 2 4 5 102.496 46.1414 38
 2 4 6 776.687 108.484 23
 2 4 6 789.944 94.8162 38
 2 4 6 664.044 107.231 21
 2 4 6 775.241 121.666 20
 2 4 6 736.108 102.743 18
 2 4 6 612.233 105.274 14
 2 4 7 215.517 74.8102 14
 2 4 7 157.708 58.6287 23
 2 4 7 137.939 62.3723 21
 2 4 7 195.042 54.7787 38
 2 4 7 155.679 78.9141 20
 2 4 8 1466.5 133.031 14
 2 4 8 1181.31 105.793 38
 2 4 8 1259.83 124.637 21
 2 4 8 1369.96 127.219 23
 2 4 8 1438.35 131.06 20
 -2 -4 -8 1327.71 115.707 12
 2 4 9 728.241 80.6411 14
 2 4 9 731.97 85.9773 23
 -2 -4 -9 733.964 74.6649 12
 2 4 9 683.797 67.7813 38
 2 4 9 645.892 77.0085 21
 2 4 9 720.128 82.7905 20
 -2 -5 14 2391.14 119.817 17
 2 5 -14 2648.52 128.955 13
 -2 -5 14 2516.94 120.677 37
 2 5 -14 2564.29 128.872 35
 2 5 -14 2752.25 140.695 16
 2 5 -13 1341.08 122.444 13
 2 5 -13 1332.14 112.141 39
 -2 -5 13 1217.19 105.794 37
 2 5 -13 1233.87 114.991 35
 2 5 -12 1326.42 138.931 13
 -2 -5 12 1431.67 131.822 37
 2 5 -12 1673.04 138.868 39
 2 5 -12 1488.77 140.512 35
 2 5 -11 589.4 101.827 13
 -2 -5 11 587.317 91.3988 37
 2 5 -11 750.182 100.124 39
 2 5 -11 768.992 106.158 10
 2 5 -11 781.55 109.778 35
 2 5 -10 66.2278 41.9436 39
 2 5 -10 101.902 51.7254 35
 2 5 -10 -12.6491 50.0956 13
 2 5 -10 51.8668 45.3242 10
 -2 -5 10 36.4449 50.3449 37
 -2 -5 9 5707.29 697.775 26
 2 5 -9 7005.36 290.11 39
 2 5 -9 7163.4 296.493 15
 2 5 -9 6841.23 298.144 13
 2 5 -9 7025.51 627.879 6
 -2 -5 9 6933.9 280.722 37
 2 5 -9 7794.85 649.503 3
 2 5 -9 7515.76 308.846 35
 2 5 -9 6986.08 292.165 10
 -2 -5 9 7537.17 623.543 30
 -2 -5 8 189.232 199.124 26
 2 5 -8 -33.5664 37.3242 13
 2 5 -8 77.0229 47.4339 35
 2 5 -8 -26.4227 54.6833 6
 2 5 -8 -8.23932 93.2582 3
 -2 -5 7 2189.82 398.529 26
 2 5 -7 2354.58 336.851 3
 2 5 -7 1718.71 273.114 6
 2 5 -6 244.581 104.248 4
 -2 -5 6 -67.4972 138.857 26
 2 5 -6 -0.96928 67.427 6
 2 5 -6 181.161 109.32 3
 -2 -5 6 30.5712 69.2858 29
 -2 -5 5 -22.6836 64.6545 29
 -2 -5 5 169.276 154.561 26
 2 5 -5 -47.1149 72.2785 4
 2 5 -5 9.59592 78.3644 3
 -2 -5 4 3022.2 310.833 29
 -2 -5 4 2481.62 304.362 26
 2 5 -4 2918.58 273.387 3
 2 5 -4 2635.83 264.27 4
 2 5 -4 2939.11 326.754 6
 -2 -5 3 5620.48 419.705 29
 -2 -5 3 5499.35 425.614 26
 2 5 -3 6499.6 500.279 5
 -2 -5 3 6508.67 393.26 25
 2 5 -3 6184.5 475.278 6
 -2 -5 2 1279.83 174.582 27
 2 5 -2 1066.8 224.203 6
 -2 -5 2 1408.63 198.995 25
 2 5 -2 1000.29 180.302 2
 2 5 -2 992.79 209.28 5
 -2 -5 1 -152.491 68.384 25
 -2 -5 1 66.3497 53.853 27
 2 5 -1 -5.08523 75.4341 2
 2 5 -1 165.746 126.268 5
 -2 -5 0 -166.423 104.52 27
 -2 -5 0 28.4019 81.6861 25
 2 5 0 48.6952 77.9078 2
 2 5 0 144.471 90.7707 5
 -2 -5 -1 1988.42 303.199 27
 -2 -5 -1 1908.8 297.568 25
 2 5 1 1740.54 260.865 2
 2 5 1 2120.04 299.312 5
 -2 -5 -2 22872 1032.42 27
 2 5 2 22066.9 972.979 2
 -2 -5 -2 20837.8 968.683 25
 2 5 2 21430.1 1015.95 5
 -2 -5 -3 2536.15 362.667 25
 -2 -5 -3 2998.05 409.645 27
 2 5 3 3019.93 195.347 14
 2 5 3 3091.9 205.1 11
 2 5 3 2744.03 382.574 5
 2 5 3 3362.26 206.169 21
 2 5 3 3380.71 414.395 2
 2 5 3 3418.49 208.49 20
 2 5 4 1790.08 163.674 20
 -2 -5 -4 2282.28 363.685 27
 2 5 4 2947.68 413.033 2
 2 5 4 1724.43 152.894 14
 -2 -5 -4 2533.39 375.208 25
 2 5 4 1193.14 275.096 5
 2 5 4 2073.49 161.027 23
 2 5 4 1618.72 153.648 21
 2 5 4 1775.06 173.405 11
 2 5 5 -8.19815 63.8135 20
 2 5 5 106.092 58.7631 14
 2 5 5 -48.8922 34.1859 23
 2 5 5 81.0224 37.5359 18
 2 5 5 3.14286 47.7404 21
 2 5 6 869.037 119.67 14
 2 5 6 921.926 109.031 23
 2 5 6 747.074 107.955 21
 2 5 6 956.35 112.962 18
 2 5 6 1047.39 130.643 20
 2 5 7 920.836 110.974 21
 2 5 7 965.677 113.661 14
 2 5 7 1130.46 113.793 23
 2 5 7 900.716 114.761 20
 2 5 8 200.759 56.2599 21
 2 5 8 291.222 57.7666 23
 2 5 8 228.905 59.1945 20
 2 5 8 360.628 66.5063 14
 -2 -5 -8 262.204 47.8373 12
 2 5 9 1169.11 76.0274 14
 2 5 9 920.127 64.6127 23
 2 5 9 1138.43 74.2765 21
 2 5 9 1107.63 71.9115 20
 2 6 -14 765.3 72.8143 16
 2 6 -14 796.651 72.7427 13
 2 6 -14 729.088 65.3703 35
 -2 -6 13 3720.09 154.666 37
 2 6 -13 3984.84 193.82 13
 2 6 -13 3749.31 178.786 35
 2 6 -13 3896.32 191.816 16
 -2 -6 13 3445.67 161.285 17
 2 6 -12 1088.37 127.22 13
 -2 -6 12 789.443 84.8558 37
 2 6 -12 906.665 105.856 35
 2 6 -12 848.695 112.862 16
 2 6 -11 1670.94 153.809 13
 2 6 -11 1645.14 153.79 16
 2 6 -11 1893.14 146.684 39
 -2 -6 11 1763.15 139.629 37
 2 6 -11 1822.47 146.923 10
 2 6 -11 1626.93 147.389 35
 2 6 -10 121.715 65.1804 16
 2 6 -10 123.574 52.6224 11
 2 6 -10 228.182 74.0938 13
 2 6 -10 188.239 51.2608 39
 2 6 -10 113.016 58.1486 35
 -2 -6 9 1470.31 284.483 30
 2 6 -9 1241.08 139.547 16
 2 6 -9 1329.04 138.611 15
 -2 -6 9 2021.73 420.685 26
 2 6 -9 1365.58 139.185 13
 2 6 -9 1490.67 135.668 11
 2 6 -9 1502.32 144.543 35
 2 6 -9 1351.57 286.502 3
 2 6 -8 82.2978 53.3785 16
 2 6 -8 73.6811 65.1428 15
 2 6 -8 130.431 54.8925 13
 2 6 -8 94.5724 45.5443 11
 2 6 -8 68.158 43.4581 35
 2 6 -8 253.785 147.056 3
 2 6 -7 -37.4096 45.5001 15
 2 6 -7 3.01163 43.2828 35
 -2 -6 7 183.48 181.099 26
 2 6 -7 44.7164 40.2754 11
 2 6 -7 73.9299 48.3074 22
 2 6 -7 189.099 56.3137 16
 2 6 -7 34.1273 82.0916 6
 2 6 -7 318.405 144.155 3
 2 6 -7 77.617 30.2622 13
 -2 -6 6 4757.04 521.889 26
 2 6 -6 5573.44 486.462 4
 2 6 -6 4796.99 477.867 6
 -2 -6 6 5563.07 508.531 29
 2 6 -6 5489.02 465.802 3
 -2 -6 5 23.1418 58.8172 29
 2 6 -5 265.313 156.273 6
 -2 -6 4 5497.7 462.611 29
 -2 -6 4 5537.94 481.089 26
 2 6 -4 4870.85 467.579 6
 -2 -6 3 1128.01 225.072 29
 -2 -6 3 877.874 206.909 26
 2 6 -3 1188.46 231.696 6
 -2 -6 2 753.696 155.426 25
 2 6 -2 811.725 230.48 6
 -2 -6 2 1041.87 199.848 29
 2 6 -2 993.731 233.326 5
 2 6 -2 741.644 179.862 2
 -2 -6 1 3681.53 356.24 27
 2 6 -1 3161.39 395.936 5
 -2 -6 1 3188.43 352.207 25
 2 6 -1 3976.53 395.802 2
 -2 -6 0 172.708 121.003 27
 2 6 0 -119.286 83.2151 2
 -2 -6 0 264.001 117.615 25
 2 6 0 203.665 99.8057 5
 2 6 1 -9.93898 106.322 2
 2 6 1 76.1039 47.6594 8
 2 6 1 309.659 61.8264 14
 2 6 1 361.972 71.5837 21
 2 6 1 315.06 74.5032 20
 2 6 1 218.432 68.7209 11
 -2 -6 -1 -147.826 113.369 25
 2 6 1 187.777 61.3981 16
 2 6 1 -125.638 121.451 5
 2 6 2 1833.16 154.387 8
 2 6 2 1340.77 267.634 5
 2 6 2 1895.6 157.713 14
 2 6 2 1897.41 168.142 11
 -2 -6 -2 1846.02 317.754 25
 2 6 2 1780.27 158.763 21
 2 6 2 1993.91 164.805 20
 2 6 2 1966.46 170.933 16
 2 6 2 1589.97 290.201 2
 -2 -6 -2 1689.38 319.033 27
 2 6 3 631.959 105.267 20
 2 6 3 537.09 93.9013 14
 2 6 3 577.216 98.0474 21
 2 6 3 566.152 117.46 11
 2 6 3 576.797 91.6861 8
 2 6 4 4217 241.132 20
 2 6 4 4173.6 237.986 14
 2 6 4 4122.96 239.686 21
 2 6 5 312.157 81.2448 14
 2 6 5 539.705 79.6746 23
 2 6 5 374.771 91.4328 21
 2 6 5 425.597 98.8004 20
 2 6 6 2607.99 154.848 23
 2 6 6 2396.63 167.524 21
 2 6 6 2242.57 166.387 20
 2 6 6 2478.96 171.718 14
 2 6 7 -9.16371 44.5108 14
 2 6 7 -10.7653 30.7095 23
 2 6 7 -34.1284 49.184 21
 2 6 7 2.36576 52.451 20
 2 6 8 17.1472 25.2241 21
 2 6 8 32.6495 27.2466 14
 2 6 8 -36.5325 30.4998 20
 2 7 -14 248.124 40.7803 16
 2 7 -14 271.688 42.9115 13
 2 7 -13 4849.58 197.181 16
 2 7 -13 5180.62 203.715 13
 2 7 -13 4777.45 181.18 35
 2 7 -12 930.93 114.7 16
 2 7 -12 849.371 106.811 13
 2 7 -12 634.055 86.1143 35
 2 7 -11 2192.63 166.522 13
 2 7 -11 2000.7 143.099 11
 2 7 -11 2092.38 159.139 35
 2 7 -11 1993.57 167.372 16
 2 7 -10 6.59501 60.1691 16
 2 7 -10 132.713 60.1763 13
 2 7 -10 -20.7254 43.0454 35
 2 7 -10 25.5482 43.0614 15
 2 7 -10 30.9135 37.8711 11
 2 7 -9 8402.54 330.388 15
 2 7 -9 8422.14 318.557 11
 2 7 -9 8215.77 322.075 35
 2 7 -9 7930.63 333.093 16
 2 7 -9 7827.91 320.743 13
 2 7 -8 68.2081 48.3627 16
 2 7 -8 115.725 70.5336 15
 2 7 -8 110.236 46.8998 13
 2 7 -8 72.6748 47.8627 11
 2 7 -8 -15.5831 42.4362 35
 2 7 -7 6634.29 296.229 16
 2 7 -7 7266.68 316.247 15
 2 7 -7 7054.6 305.355 22
 -2 -7 7 7510.82 761.441 26
 2 7 -7 6929.75 290.015 13
 2 7 -7 7161.49 297.844 11
 2 7 -7 7239.28 611.567 6
 2 7 -7 7032.9 290.234 35
 2 7 -6 108.738 57.9167 16
 -2 -7 6 -61.8614 159.702 26
 2 7 -6 215.607 79.4266 22
 2 7 -6 208.346 148.575 6
 2 7 -6 191.471 55.3111 21
 2 7 -6 134.217 62.7452 15
 2 7 -6 70.865 43.5986 11
 2 7 -5 4514.38 238.128 16
 2 7 -5 4988.6 258.533 15
 -2 -7 5 4496.9 505.766 26
 2 7 -5 4558.14 244.435 22
 2 7 -5 4608.23 235.677 21
 2 7 -5 4222.35 460.519 6
 2 7 -5 4599.81 236.443 8
 2 7 -5 4578.53 238.324 11
 -2 -7 5 5428.7 514.392 29
 2 7 -4 502.788 89.1241 21
 -2 -7 4 348.171 132.249 29
 2 7 -4 560.965 89.083 16
 2 7 -4 532.151 91.1521 15
 -2 -7 4 520.768 180.823 26
 2 7 -4 309.696 153.693 6
 2 7 -4 681.81 95.0927 8
 2 7 -4 618.273 97.339 22
 2 7 -4 700.529 101.828 11
 2 7 -3 3502.23 213.123 16
 2 7 -3 3501.34 216.525 15
 -2 -7 3 3439.14 402.854 26
 2 7 -3 3542.75 211.705 11
 2 7 -3 3316.76 208.655 22
 2 7 -3 3517.58 210.583 21
 2 7 -3 3847.58 435.675 6
 2 7 -3 3641.11 217.279 8
 -2 -7 3 2737.55 377.821 29
 2 7 -2 121.461 51.8825 8
 2 7 -2 103.248 46.153 22
 2 7 -2 174.505 58.3705 21
 2 7 -2 242.652 66.1148 15
 2 7 -2 61.158 48.5944 11
 2 7 -2 121.696 52.6095 16
 -2 -7 1 3664.27 433.758 29
 2 7 -1 4260.56 229.576 15
 2 7 -1 4005.51 226.68 21
 2 7 -1 4424.74 245.876 16
 2 7 -1 4547.24 244.155 22
 2 7 -1 4355.42 241.606 11
 2 7 -1 4355.41 502.339 5
 2 7 -1 4490.44 227.685 14
 2 7 -1 4388.05 245.908 8
 2 7 0 1028.05 126.19 8
 2 7 0 880.061 103.041 14
 -2 -7 0 663.713 189.909 25
 2 7 0 1132.69 125.871 22
 2 7 0 1019.72 121.108 21
 2 7 0 1124.07 135.763 16
 2 7 0 981.241 128.203 11
 2 7 0 821.875 104.71 20
 2 7 0 870.785 217.186 5
 2 7 1 187.686 81.0071 16
 2 7 1 116.858 49.296 14
 -2 -7 -1 299.528 177.53 25
 2 7 1 166.039 86.8718 11
 2 7 1 257.056 75.5171 21
 2 7 1 83.127 51.6495 20
 2 7 1 173.597 74.9833 8
 2 7 2 3353.07 207.849 14
 2 7 2 3423.43 211.971 8
 2 7 2 3550.97 221.784 21
 2 7 2 3458.44 229.261 11
 2 7 2 3501.41 218.588 20
 2 7 3 1986.7 173.08 21
 2 7 3 2097.25 185.918 11
 2 7 3 1875.19 160.559 14
 2 7 3 1878.22 161.968 20
 2 7 3 2089.22 160.62 8
 2 7 4 8070.28 315.368 20
 2 7 4 8017.79 308.246 14
 2 7 4 8174.39 318.424 21
 2 7 5 3627.59 201.719 21
 2 7 5 3561.33 192.926 14
 2 7 5 3957.52 207.783 20
 2 7 6 150.899 52.1747 21
 2 7 6 120.989 55.2372 20
 2 7 6 46.3523 44.8057 14
 2 7 7 740.774 66.3832 20
 2 7 7 712.738 63.67 14
 2 7 7 832.862 68.4851 21
 2 8 -13 286.914 54.6012 16
 2 8 -13 245.798 51.0314 13
 2 8 -12 20.5364 48.0084 16
 2 8 -12 -26.1029 46.3498 13
 2 8 -11 1711.77 138.235 13
 2 8 -11 1821.82 150.314 16
 2 8 -11 1868.4 129.71 11
 2 8 -10 143.736 56.7218 15
 2 8 -10 165.596 69.2268 16
 2 8 -10 123.565 59.0936 13
 2 8 -10 210.775 58.6391 11
 2 8 -9 353.853 87.4979 16
 2 8 -9 233.101 75.7993 15
 2 8 -9 298.978 69.7364 13
 2 8 -9 365.942 77.3244 11
 2 8 -8 1.27948 56.4675 16
 2 8 -8 -48.3656 40.4786 13
 2 8 -8 51.3119 48.6115 11
 2 8 -8 12.1116 63.8027 15
 2 8 -7 1456.22 151.411 16
 2 8 -7 1663.53 159.056 15
 2 8 -7 1690.45 152.415 11
 2 8 -6 49.1873 47.796 8
 2 8 -6 10.5981 63.0802 16
 2 8 -6 96.3246 73.4289 22
 2 8 -6 175.967 61.5018 21
 2 8 -6 96.2279 48.8301 11
 2 8 -6 -15.0896 74.8121 15
 2 8 -5 2513.09 196.168 15
 2 8 -5 2287.08 188.006 22
 -2 -8 5 2453.33 398.095 26
 2 8 -5 2507.23 179.537 21
 2 8 -5 2852.05 194.883 8
 2 8 -5 2450.1 187.745 16
 2 8 -5 2430.68 183.231 11
 -2 -8 4 6235.73 557.241 29
 2 8 -4 6378.42 301.411 15
 2 8 -4 6131.35 289.854 11
 2 8 -4 6176.25 288.413 8
 2 8 -4 6137.78 293.668 22
 -2 -8 4 5883.78 547.036 26
 2 8 -4 6517.2 288.959 21
 2 8 -4 6251.32 294.985 16
 -2 -8 3 367.006 163.886 29
 2 8 -3 404.243 82.9022 15
 2 8 -3 381.294 90.2529 8
 2 8 -3 406.844 91.6287 22
 2 8 -3 371.522 81.8993 21
 2 8 -3 355.312 88.7914 11
 2 8 -3 508.381 99.5634 16
 2 8 -2 130.853 76.5806 16
 2 8 -2 190.712 73.0404 15
 2 8 -2 90.135 62.5353 8
 2 8 -2 228.282 72.5868 22
 2 8 -2 187.104 74.1855 11
 2 8 -2 128.365 56.5845 21
 2 8 -1 6555.54 304.93 8
 2 8 -1 6769.24 299.321 22
 2 8 -1 6822.52 295.163 15
 2 8 -1 6571.61 303.661 11
 2 8 -1 6973.27 317.607 16
 2 8 -1 6636.07 296.483 21
 2 8 0 211.491 81.0296 16
 2 8 0 221.278 60.4986 14
 2 8 0 310.687 71.994 22
 2 8 0 220.957 92.8164 11
 2 8 0 187.527 80.7402 8
 2 8 0 185.658 58.3114 20
 2 8 0 321.595 83.5366 21
 2 8 1 4055.1 233.418 8
 2 8 1 4189.45 225.479 14
 2 8 1 3908.96 241.81 11
 2 8 1 4434.01 235.943 20
 2 8 1 3772.32 224.886 21
 2 8 1 3970.51 242.594 16
 2 8 2 55.8435 44.2297 14
 2 8 2 -1.79013 89.9405 11
 2 8 2 50.0633 53.5116 21
 2 8 2 44.1842 55.0252 8
 2 8 2 19.8275 50.3471 20
 2 8 3 2304.69 159.372 14
 2 8 3 2212.67 146.281 8
 2 8 3 2492.98 171.352 20
 2 8 3 2247.65 165.166 21
 2 8 4 2802.36 160.528 14
 2 8 4 3149.76 176.187 21
 2 8 4 3018.93 172.392 20
 2 8 5 65.5193 40.4627 14
 2 8 5 -6.69247 38.976 21
 2 8 5 8.87452 41.4037 20
 2 8 6 -30.8862 22.624 21
 2 8 6 28.9873 21.2857 14
 2 8 6 -6.27969 21.8116 20
 2 9 -13 57.2424 26.2598 16
 2 9 -12 523.008 62.3695 13
 2 9 -12 552.017 70.7449 16
 2 9 -11 1432.26 109.844 13
 2 9 -11 1293.73 92.6856 15
 2 9 -11 1518.06 103.124 11
 2 9 -11 1656.61 129.691 16
 2 9 -10 394.283 76.071 15
 2 9 -10 480.396 74.5306 13
 2 9 -10 529.294 96.0449 16
 2 9 -10 374.104 72.5715 11
 2 9 -9 2674.31 188.045 16
 2 9 -9 2526.67 175.566 15
 2 9 -9 2696 167.703 13
 2 9 -9 2505.84 166.134 11
 2 9 -8 264.224 73.9231 11
 2 9 -8 168.921 81.0055 15
 2 9 -8 203.733 84.65 16
 2 9 -7 3087.95 210.052 15
 2 9 -7 3494.87 211.688 11
 2 9 -7 3238.38 213.215 16
 2 9 -6 572.249 104.763 16
 2 9 -6 431.15 98.809 15
 2 9 -6 558.846 93.2741 8
 2 9 -6 494.513 94.4727 11
 2 9 -5 500.165 102.373 16
 2 9 -5 555.674 105.089 15
 2 9 -5 604.616 100.279 8
 2 9 -5 484.311 96.2787 11
 2 9 -5 585.505 111.097 22
 2 9 -5 541.402 92.2835 21
 2 9 -4 294.908 87.0616 16
 2 9 -4 244.181 87.3931 15
 2 9 -4 294.572 82.7653 11
 2 9 -4 311.276 92.8377 22
 2 9 -4 287.634 68.1015 21
 2 9 -4 289.686 82.8477 8
 2 9 -3 2575.45 193.52 15
 2 9 -3 2517.68 191.724 22
 2 9 -3 2643.42 194.045 8
 2 9 -3 2815.04 191.09 21
 2 9 -3 2657.78 196.531 11
 2 9 -3 2500.91 194.29 16
 2 9 -2 297.198 95.5132 16
 2 9 -2 394.608 84.5364 15
 2 9 -2 444.37 107.594 8
 2 9 -2 405.198 87.3021 22
 2 9 -2 364.434 79.3963 21
 2 9 -2 431.217 104.165 11
 2 9 -1 7258.7 314.797 16
 2 9 -1 7049.44 303.701 8
 2 9 -1 7455.79 299.184 22
 2 9 -1 6954.21 292.034 21
 2 9 -1 7069.59 311.812 11
 2 9 0 53.9183 68.6189 8
 2 9 0 77.7526 83.6387 16
 2 9 0 108.771 52.7406 20
 2 9 0 44.3948 89.0127 11
 2 9 0 6.05842 53.5276 21
 2 9 1 3165.15 186.883 8
 2 9 1 3054.7 170.405 14
 2 9 1 3075.62 177.805 20
 2 9 1 3009.75 186.261 21
 2 9 1 3072.53 206.138 11
 2 9 2 454.063 74.8621 8
 2 9 2 520.277 70.6448 14
 2 9 2 478.835 81.9846 21
 2 9 2 525.231 78.4949 20
 2 9 3 243.138 51.7252 14
 2 9 3 230.525 55.7813 20
 2 9 3 211.771 56.7883 21
 2 9 4 134.88 29.0216 14
 2 9 4 145.055 39.9911 20
 2 9 4 204.787 43.8294 21
 2 10 -12 631.207 51.8614 16
 2 10 -11 2296.26 124.274 16
 2 10 -10 324.927 59.7629 15
 2 10 -10 245.761 52.0166 11
 2 10 -10 237.094 65.052 16
 2 10 -9 1946.95 138.6 15
 2 10 -9 2007.34 135.006 11
 2 10 -9 2021.23 146.125 16
 2 10 -8 875.02 113.765 16
 2 10 -8 794.362 106.925 15
 2 10 -8 828.301 102.421 11
 2 10 -7 6932.2 285.018 15
 2 10 -7 6964.48 273.268 11
 2 10 -7 6869.38 283.592 16
 2 10 -6 540.846 104.489 16
 2 10 -6 579.958 112.01 15
 2 10 -6 445.616 83.6252 8
 2 10 -6 367.916 87.2077 11
 2 10 -5 1418.91 146.674 16
 2 10 -5 1559.66 149.757 15
 2 10 -5 1507.24 138.222 8
 2 10 -5 1587.97 147.002 11
 2 10 -4 1153.46 130.958 15
 2 10 -4 1092.27 130.327 11
 2 10 -4 1232.81 115.144 21
 2 10 -4 1208 140.891 16
 2 10 -4 1249.7 131.42 8
 2 10 -3 1292.78 136.798 8
 2 10 -3 1414.35 122.399 21
 2 10 -3 1356.23 146.507 16
 2 10 -3 1291.9 142.163 11
 2 10 -2 1087.11 125.614 8
 2 10 -2 1023.42 106.349 21
 2 10 -2 819.661 120.058 11
 2 10 -2 1015.93 129.177 16
 2 10 -1 954.159 100.202 21
 2 10 -1 980.258 118.575 8
 2 10 -1 1015.7 127.738 11
 2 10 -1 995.96 125.247 16
 2 10 0 187.051 81.255 11
 2 10 0 187.449 67.8618 8
 2 10 0 232.17 59.5779 21
 2 10 1 53.6929 44.6538 8
 2 10 1 7.05882 40.1996 21
 2 10 1 53.9609 30.968 20
 2 10 2 491.049 56.1544 21
 2 10 2 408.439 43.744 20
 2 11 -10 172.928 40.1881 16
 2 11 -9 621.497 75.4346 16
 2 11 -9 631.285 61.3936 11
 2 11 -8 62.3685 39.5355 11
 2 11 -8 -44.9577 58.0244 16
 2 11 -7 -39.4323 63.8933 16
 2 11 -7 -42.1804 47.3802 11
 2 11 -6 1612.99 107.227 8
 2 11 -6 1834.54 129.497 11
 2 11 -6 1778.43 136.568 16
 2 11 -5 698.01 100.093 16
 2 11 -5 670.27 91.5244 11
 2 11 -5 766.795 88.7711 8
 2 11 -4 295.603 77.4372 16
 2 11 -4 257.68 66.7861 8
 2 11 -4 327.148 76.9307 11
 2 11 -3 104.836 58.2363 8
 2 11 -3 65.8682 59.4248 11
 2 11 -3 30.0095 52.6131 16
 2 11 -2 8.02661 53.9422 8
 2 11 -2 35.1164 55.8116 11
 2 11 -1 158.169 51.5665 8
 2 11 -1 331.835 67.7698 11
 2 11 0 585.861 58.8343 8
 2 12 -7 83.7561 30.899 16
 2 12 -6 103.549 34.0668 16
 2 12 -6 180.015 36.8896 11
 2 12 -5 137.678 39.1032 16
 2 12 -5 65.5658 31.8496 11
 2 12 -4 297.451 42.9311 11
 -3 13 0 592.321 62.2957 8
 -3 13 0 578.778 51.5869 20
 -3 13 -1 39.7763 34.0951 8
 -3 13 -1 103.507 27.9703 20
 -3 13 -2 5765.87 190.114 8
 -3 13 -2 5575.97 181.215 9
 -3 13 -3 2081.44 118.618 9
 -3 13 -3 1918.45 106.364 8
 3 -13 3 1819.67 106.961 36
 -3 13 -4 1179.4 92.9088 9
 -3 13 -4 953.083 68.2635 8
 -3 13 -4 1011.49 73.9735 11
 3 -13 4 1195 91.8447 36
 -3 13 -5 1026.98 74.7471 11
 -3 13 -5 1176.4 90.5665 9
 -3 13 -6 880.752 74.7354 9
 -3 13 -6 772.836 63.3018 11
 -3 13 -7 73.446 30.0673 9
 -3 12 3 603.902 52.7853 8
 -3 12 3 816.904 68.3359 20
 -3 12 2 1055.67 90.3586 8
 -3 12 2 1261.91 97.0603 20
 -3 12 1 1615.69 124.483 8
 -3 12 1 1719.87 120.878 20
 -3 12 0 961.653 108.323 8
 -3 12 0 913.814 94.1204 20
 -3 12 -1 631.245 90.6441 9
 -3 12 -1 586.018 91.5419 8
 3 -12 1 577.052 70.4446 36
 -3 12 -2 103.97 57.474 9
 -3 12 -2 105.451 48.104 11
 3 -12 2 160.786 48.7276 36
 -3 12 -2 87.8954 50.6954 8
 -3 12 -3 86.4579 60.7383 9
 -3 12 -3 45.9961 48.5236 8
 -3 12 -3 74.9042 47.613 11
 -3 12 -4 130.071 58.9288 9
 -3 12 -4 117.65 44.3689 8
 -3 12 -4 148.001 54.5215 34
 -3 12 -4 95.3876 53.9822 11
 -3 12 -5 42.0526 37.3503 34
 -3 12 -5 109.503 53.509 11
 3 -12 5 142.817 40.1527 32
 -3 12 -5 120.142 64.0906 9
 -3 12 -6 218.512 66.7879 9
 3 -12 6 72.6158 37.7859 32
 -3 12 -6 121.349 51.5016 11
 -3 12 -6 162.104 43.7825 34
 -3 12 -7 503.588 75.262 9
 -3 12 -7 563.723 78.2112 11
 3 -12 7 491.48 66.3326 32
 -3 12 -7 377.509 53.4679 34
 -3 12 -8 1058.27 91.8606 9
 3 -12 8 899.789 82.671 32
 -3 12 -8 984.2 85.4924 11
 -3 12 -9 240.21 44.5004 9
 3 -12 9 233.31 41.3837 32
 -3 12 -9 233.746 42.9699 11
 3 -11 -5 36.9501 31.6113 35
 -3 11 5 100.498 34.8493 20
 -3 11 4 38.321 32.6099 18
 -3 11 4 -22.0446 29.3204 8
 -3 11 4 72.6868 49.8678 20
 -3 11 3 198.397 46.9665 18
 -3 11 3 134.211 54.7157 8
 -3 11 3 192.516 64.9429 20
 -3 11 3 243.252 47.5829 33
 -3 11 2 2490.83 167.236 8
 -3 11 2 2499.87 153.287 18
 3 -11 -2 2563.62 143.274 39
 -3 11 2 2554.29 169.187 20
 -3 11 1 1863.74 150.952 9
 -3 11 1 1859.11 159.131 8
 -3 11 1 1638.55 130.189 18
 -3 11 0 56.0045 59.4208 9
 -3 11 0 -4.58311 57.809 8
 3 -11 0 -12.2483 50.7308 36
 -3 11 -1 2138.94 169.242 8
 -3 11 -1 2072.66 165.237 9
 -3 11 -1 2261.92 160.214 11
 -3 11 -2 -45.6915 56.8639 11
 -3 11 -2 32.7354 56.3983 8
 -3 11 -2 54.0692 66.5077 9
 -3 11 -2 21.3435 59.1606 34
 -3 11 -3 2764.71 194.542 9
 -3 11 -3 2992.04 189.81 8
 -3 11 -3 2800.34 192.042 34
 -3 11 -3 3038.04 192.72 11
 -3 11 -4 1750.75 142.863 8
 -3 11 -4 1595.56 148.265 11
 3 -11 4 1739.12 143.441 32
 -3 11 -4 1676.46 158.588 9
 -3 11 -4 1467.9 140.846 34
 -3 11 -5 46.4508 54.233 9
 -3 11 -5 14.7429 47.1748 34
 3 -11 5 -38.9472 60.0971 32
 -3 11 -5 47.339 47.9509 11
 -3 11 -6 460.95 94.53 9
 -3 11 -6 518.29 92.231 11
 -3 11 -6 315.675 72.9671 34
 3 -11 6 306.602 81.6232 32
 -3 11 -7 927.683 105.97 11
 -3 11 -7 993.958 101.106 34
 -3 11 -7 984.663 118.621 9
 3 -11 7 855.443 100.914 32
 -3 11 -8 104.527 62.1717 9
 3 -11 8 -10.617 48.0576 32
 -3 11 -8 -16.2207 46.6722 11
 -3 11 -8 139.801 43.3399 34
 -3 11 -9 1485.16 114.894 9
 -3 11 -9 1545.68 115.199 11
 3 -11 9 1457.19 114.357 32
 -3 11 -10 67.4898 35.1199 9
 3 -11 10 106.449 35.5788 32
 -3 11 -10 107.865 40.0001 11
 3 -10 -7 398.997 42.7665 35
 -3 10 6 466.476 55.5111 23
 -3 10 6 526.004 68.151 20
 -3 10 6 483.459 64.102 33
 3 -10 -6 552.28 75.4937 35
 -3 10 6 602.431 69.8434 18
 3 -10 -5 -6.84192 20.2138 39
 -3 10 5 -51.2427 35.0204 23
 -3 10 5 -28.1564 33.9364 8
 -3 10 5 63.5015 49.5739 18
 -3 10 5 -1.94285 36.3984 33
 -3 10 5 73.5012 59.9969 20
 -3 10 4 21.6189 40.7819 8
 -3 10 4 -9.06616 43.3416 18
 -3 10 4 17.7016 59.8654 20
 3 -10 -4 -22.5499 37.6588 39
 -3 10 4 1.14251 36.4786 33
 -3 10 3 3118.02 195.853 8
 3 -10 -3 3015.91 176.939 39
 -3 10 3 3140.34 201.69 20
 -3 10 3 3218.35 186.916 33
 -3 10 3 3084.09 192.464 18
 -3 10 2 55.3769 64.7266 8
 -3 10 2 42.2611 38.6986 33
 -3 10 2 4.8784 39.6292 18
 -3 10 2 28.2761 56.1395 9
 -3 10 1 453.252 95.4881 9
 -3 10 1 406.814 97.0595 8
 3 -10 -1 442.637 90.3454 36
 -3 10 0 4364.81 245.624 9
 -3 10 0 4640.99 255.661 8
 -3 10 0 4620.62 249.46 34
 -3 10 -1 3441.59 219.482 8
 -3 10 -1 4197.4 225.584 11
 -3 10 -1 3699.42 227.076 9
 -3 10 -1 3696.54 225.169 34
 -3 10 -2 4948.27 264.834 9
 -3 10 -2 4627.12 248.88 8
 -3 10 -2 5501.77 264.557 11
 -3 10 -2 4851.95 254.002 34
 -3 10 -3 12778.1 417.887 9
 -3 10 -3 12444.6 397.488 8
 -3 10 -3 13519.6 415.57 11
 -3 10 -3 12179.1 398.998 34
 3 -10 3 13242.8 399.943 32
 -3 10 -4 3899.45 234.348 9
 -3 10 -4 4391.01 229.679 8
 -3 10 -4 3864.24 227.185 34
 -3 10 -4 3943.86 217.703 12
 -3 10 -4 3858.28 225.589 11
 -3 10 -5 3250.36 215.376 9
 -3 10 -5 3603.16 208.513 12
 -3 10 -5 3299.99 210.109 11
 -3 10 -5 3358.68 207.106 34
 -3 10 -6 2916.86 202.27 9
 -3 10 -6 3226.9 190.759 12
 -3 10 -6 3186.49 199.097 34
 -3 10 -6 3045.54 202.634 11
 3 -10 6 3382.54 201.713 17
 -3 10 -7 111.148 34.7756 12
 -3 10 -7 75.2702 66.0286 9
 -3 10 -7 61.581 43.6413 34
 -3 10 -7 59.574 60.8917 11
 3 -10 7 6.46048 25.5675 17
 3 -10 8 79.674 41.4715 17
 -3 10 -8 31.8901 60.4788 9
 -3 10 -8 98.3367 37.0082 12
 -3 10 -8 171.441 51.7356 34
 -3 10 -8 77.4863 61.1228 11
 -3 10 -9 2032.77 148.639 9
 -3 10 -9 2014.68 122.327 34
 -3 10 -9 1932.2 145.027 11
 3 -10 9 2210.67 145.198 17
 3 -10 10 216.115 48.9722 17
 -3 10 -10 230.297 60.5613 11
 -3 10 -10 286.991 63.9246 9
 3 -10 10 237.208 59.0707 32
 3 -10 11 1943.26 100.742 32
 -3 10 -11 2136.52 111.973 11
 -3 10 -11 2108.22 109.253 9
 3 -9 -8 728.71 65.1663 35
 -3 9 8 704.438 59.9376 23
 -3 9 8 769.411 65.9462 18
 -3 9 7 367.856 50.0995 14
 -3 9 7 338.444 58.4833 20
 -3 9 7 275.095 60.5344 18
 -3 9 7 325.878 61.4425 23
 3 -9 -7 335.162 43.4688 39
 3 -9 -7 337.966 73.4528 35
 -3 9 7 337.049 65.068 33
 -3 9 6 40.1417 47.1601 23
 3 -9 -6 -6.45642 23.566 39
 -3 9 6 -11.5764 28.4479 14
 -3 9 6 71.4404 57.1124 20
 -3 9 6 33.5949 47.0595 18
 -3 9 6 7.21118 49.4169 33
 -3 9 5 318.141 64.4532 8
 3 -9 -5 318.115 70.5362 39
 -3 9 5 482.639 88.7552 18
 -3 9 5 370.541 94.3364 20
 -3 9 5 321.349 78.9482 33
 -3 9 4 156.424 54.4972 19
 3 -9 -4 217.272 66.1136 39
 -3 9 4 212.396 61.7939 8
 -3 9 4 221.641 68.9554 18
 -3 9 4 95.7591 53.0866 33
 -3 9 3 19.2026 60.1556 8
 -3 9 3 105.817 50.3221 18
 -3 9 3 15.681 39.865 19
 -3 9 3 -32.315 40.812 33
 -3 9 2 4232.54 240.215 8
 3 -9 -2 4325.72 235.493 36
 -3 9 2 3955.36 236.386 9
 -3 9 2 4507.53 235.711 33
 -3 9 1 275.693 75.7846 9
 3 -9 -1 1236.57 283.218 29
 3 -9 -1 987.668 238.234 27
 -3 9 1 288.666 80.954 34
 -3 9 1 683.575 227.999 2
 -3 9 0 16022.4 463.417 9
 3 -9 0 18163.1 995.204 29
 3 -9 0 18647.9 1000.27 27
 3 -9 0 16472.2 923.214 26
 -3 9 0 16629.4 954.288 2
 -3 9 0 16479.6 463.924 34
 -3 9 -1 18830.1 497.403 9
 3 -9 1 18684.9 1026.81 29
 -3 9 -1 19396.9 988.284 4
 3 -9 1 18355.8 982.1 27
 -3 9 -1 19568.1 479.48 11
 3 -9 1 19170.2 993.097 26
 -3 9 -1 18040 482.317 34
 3 -9 2 -211.881 145.911 29
 -3 9 -2 48.0441 45.079 34
 3 -9 2 97.682 115.053 27
 -3 9 -2 33.9047 42.898 9
 3 -9 2 -389.165 168.092 26
 -3 9 -2 -106.917 86.8059 4
 -3 9 -2 110.47 41.9434 12
 -3 9 -2 137.452 55.136 11
 3 -9 2 103.513 58.4679 32
 3 -9 3 2885.69 443.814 29
 3 -9 3 1919.02 333.758 27
 3 -9 3 2573.7 375.555 26
 -3 9 -3 2060.71 339.488 4
 -3 9 -3 2134.28 160.063 12
 -3 9 -3 1960.57 158.394 11
 -3 9 -3 2183.83 168.897 34
 -3 9 -3 2125.91 171.717 9
 3 -9 4 472.691 219.658 29
 -3 9 -4 423.996 97.1585 9
 -3 9 -4 497.455 91.5035 11
 3 -9 4 448.065 152.255 27
 3 -9 4 751.216 244.8 26
 -3 9 -4 123.763 111.167 4
 -3 9 -4 560.874 87.2686 12
 -3 9 -4 518.81 92.306 34
 -3 9 -5 971.641 127.169 9
 3 -9 5 1330.22 323.679 26
 -3 9 -5 1096.63 128.185 13
 -3 9 -5 913.171 121.012 11
 -3 9 -5 982.97 113.22 12
 -3 9 -5 1074.37 125.498 34
 3 -9 5 1080.15 120.233 17
 -3 9 -6 108.915 69.6828 13
 -3 9 -6 141.426 58.5849 12
 3 -9 6 199.023 62.8403 17
 -3 9 -6 170.308 64.6976 34
 -3 9 -7 -2.17412 59.4149 13
 -3 9 -7 53.1786 40.65 12
 3 -9 7 100.353 58.2909 17
 -3 9 -7 54.3764 47.8997 34
 3 -9 8 714.284 100.206 17
 -3 9 -8 840.843 116.035 13
 -3 9 -8 799.522 99.1559 34
 -3 9 -8 916.324 107.674 12
 -3 9 -9 1371.6 134.264 13
 -3 9 -9 1572.58 128.019 12
 -3 9 -9 1623.2 127.501 34
 3 -9 9 1458.91 131.956 17
 -3 9 -10 46.7412 29.2614 12
 3 -9 10 79.704 48.559 17
 3 -9 11 68.5498 38.8547 17
 -3 9 -11 23.8989 40.4183 9
 -3 9 -11 33.3162 39.1666 11
 3 -9 11 -10.1329 35.6791 32
 -3 9 -12 144.35 30.3137 9
 -3 9 -12 177.249 34.9477 11
 3 -9 12 107.41 24.3362 17
 -3 8 9 91.6818 31.7548 14
 -3 8 9 12.2216 25.3347 18
 -3 8 9 23.1656 31.2692 23
 3 -8 -9 -27.2979 31.8836 35
 -3 8 8 1156.45 98.1136 14
 -3 8 8 1042.19 89.5677 20
 -3 8 8 1103.03 107.035 23
 -3 8 8 1088.04 109.183 18
 -3 8 8 1062.1 87.9689 21
 3 -8 -8 979.807 82.7999 39
 3 -8 -8 1115.01 116.07 35
 -3 8 8 1215.27 107.899 33
 -3 8 7 147.308 66.4958 23
 -3 8 7 61.0137 36.8103 21
 -3 8 7 64.0659 61.4299 33
 -3 8 7 170.928 64.2199 18
 -3 8 7 39.35 44.3342 20
 3 -8 -7 61.9843 31.1248 39
 3 -8 -6 687.602 99.3362 39
 -3 8 6 808.848 96.8186 21
 -3 8 6 668.271 102.952 20
 -3 8 6 627.695 106.365 18
 -3 8 6 854.876 110.535 33
 -3 8 6 668.038 96.115 19
 -3 8 5 520.885 85.1407 8
 -3 8 5 400.972 87.7977 20
 -3 8 5 552.657 98.5043 33
 -3 8 5 539.404 90.1434 19
 3 -8 -5 564.983 95.5318 39
 -3 8 5 531.479 105.176 18
 -3 8 4 402.622 85.9891 8
 -3 8 4 364.457 78.7307 19
 -3 8 4 297.39 71.5939 33
 -3 8 4 289.507 72.9595 18
 3 -8 -3 26356.5 563.143 36
 -3 8 3 25117.8 574.487 9
 3 -8 -3 27119.6 1167.79 29
 -3 8 3 27206.5 1221.13 2
 3 -8 -3 25655.8 1172.91 25
 -3 8 3 25591.7 564.215 33
 -3 8 3 26037.1 565.406 19
 3 -8 -3 26827.4 1201.59 27
 3 -8 -2 2663.37 367.988 27
 -3 8 2 1844.23 305.083 2
 -3 8 2 2194.08 169.082 9
 -3 8 2 2342.44 167.149 19
 3 -8 -2 2459.41 176.95 36
 -3 8 2 2477.18 174.204 33
 -3 8 2 2149.43 173.633 34
 3 -8 -2 2402.47 338.683 25
 3 -8 -2 2624.5 355.647 29
 3 -8 -1 6719.05 570.937 29
 -3 8 1 6480.77 576.681 2
 3 -8 -1 7034.72 568.02 25
 -3 8 1 6725.47 289.197 9
 -3 8 1 6497.97 285.718 34
 3 -8 -1 6619.79 571.473 27
 -3 8 1 7433.46 587.626 4
 3 -8 0 1992.25 312.585 29
 -3 8 0 1948.62 154.77 9
 3 -8 0 1744.52 306.272 27
 -3 8 0 1920.59 155.313 34
 -3 8 0 1932.54 302.936 4
 -3 8 0 1636.32 300.541 2
 3 -8 1 1463.26 265.428 29
 3 -8 1 884.175 215.902 27
 3 -8 1 1229.51 243.709 26
 -3 8 -1 1155.64 238.79 4
 3 -8 2 1089.14 219.755 27
 3 -8 2 1302.69 276.467 29
 3 -8 2 1425.9 258.882 26
 -3 8 -2 1352.58 271.755 4
 -3 8 -2 1328.01 235.789 3
 -3 8 -3 3198.3 200.834 9
 -3 8 -3 3345.01 427.926 4
 3 -8 3 3268.21 371.773 27
 3 -8 3 3272.53 392.55 26
 3 -8 3 3283.29 446.892 29
 -3 8 -3 2861.25 362.413 3
 -3 8 -3 3053.81 191.269 34
 -3 8 -4 2835.97 186.027 13
 3 -8 4 3058.23 371.791 27
 3 -8 4 3309.83 440.12 26
 -3 8 -4 2980.24 192.886 9
 -3 8 -4 2593.87 391.153 4
 -3 8 -4 3120.29 189.885 12
 3 -8 4 3036.74 468.113 29
 -3 8 -4 2938.65 188.102 34
 3 -8 4 2687.03 177.017 17
 -3 8 -4 2692.86 385.502 3
 3 -8 5 1557.46 357.753 29
 3 -8 5 1897.01 303.569 27
 3 -8 5 1753.08 354.599 26
 -3 8 -5 2054.3 163.421 34
 -3 8 -5 2121.55 165.276 13
 -3 8 -5 2138.62 162.764 12
 -3 8 -5 1924.12 331.237 4
 -3 8 -5 2092.13 358.707 3
 3 -8 5 1974.07 159.751 17
 3 -8 6 26184.6 1450.48 29
 3 -8 6 28603.2 1520.18 26
 -3 8 -6 27600 603.231 13
 -3 8 -6 28805.3 594.388 12
 -3 8 -6 27996.7 1253.85 3
 -3 8 -6 31048.3 1331.9 4
 -3 8 -6 29497.4 608.093 35
 -3 8 -6 28837.8 603.03 34
 3 -8 6 28355.9 600.933 17
 -3 8 -7 3190.51 204.962 34
 -3 8 -7 2806.71 202.129 13
 -3 8 -7 3306.85 205.818 12
 -3 8 -7 3114.4 204.765 35
 3 -8 7 3056.5 204.638 17
 3 -8 8 126.444 58.7542 17
 -3 8 -8 126.258 53.659 12
 -3 8 -8 25.9341 35.4923 34
 -3 8 -8 15.7619 49.7735 35
 3 -8 9 306.299 77.5347 17
 -3 8 -9 369.061 81.8925 13
 -3 8 -9 494.192 82.0194 12
 -3 8 -9 477.216 79.72 34
 -3 8 -9 453.728 82.7779 35
 3 -8 10 -29.9332 48.8395 17
 -3 8 -10 -9.48886 48.1958 13
 -3 8 -10 33.5707 40.0812 12
 -3 8 -10 -15.1847 36.0985 34
 -3 8 -10 -35.6291 37.449 35
 3 -8 11 -29.6037 45.3295 17
 -3 8 -11 -8.11362 29.4803 12
 3 -8 11 1.31259 30.2048 32
 -3 8 -12 270.37 42.3128 9
 3 -8 12 291.913 51.4424 17
 -3 7 10 9.96927 25.8649 14
 -3 7 10 -9.30469 30.8927 23
 -3 7 10 -0.54382 23.2363 21
 3 -7 -10 -19.4878 13.7034 39
 3 -7 -10 -0.12893 30.6058 35
 -3 7 10 10.4299 28.1248 18
 3 -7 -9 79.3832 64.3412 35
 -3 7 9 28.6007 50.7689 23
 -3 7 9 5.16226 35.5184 21
 3 -7 -9 39.4297 31.151 39
 -3 7 9 37.6809 51.3707 18
 -3 7 9 74.7636 42.6655 33
 -3 7 8 11.8868 43.1155 21
 -3 7 8 2.94654 57.5944 23
 -3 7 8 -20.7553 61.6028 33
 -3 7 8 27.9079 41.2142 20
 3 -7 -8 -4.70085 77.9755 35
 -3 7 8 -37.6304 62.3476 18
 3 -7 -8 -30.6618 29.3238 39
 -3 7 7 328.921 87.1621 33
 -3 7 7 362.416 85.5671 18
 3 -7 -7 320.724 75.8902 39
 -3 7 7 340.549 74.4707 20
 -3 7 7 336.356 83.083 19
 3 -7 -6 185.283 71.9354 39
 -3 7 6 271.153 74.9791 20
 -3 7 6 273.976 80.752 18
 -3 7 6 350.95 81.9223 19
 -3 7 6 334.889 82.1485 33
 3 -7 -5 1520.44 296.359 27
 -3 7 5 1089.49 123.561 19
 3 -7 -5 1143.88 276.474 25
 -3 7 5 868.457 226.509 2
 -3 7 5 1340.01 138.585 33
 -3 7 5 1097.19 135.45 18
 3 -7 -5 1167.86 133.24 39
 3 -7 -4 -313.045 161.188 27
 3 -7 -4 -104.174 134.528 25
 -3 7 4 -72.0765 46.7371 9
 -3 7 4 -3.9388 31.2289 19
 -3 7 4 -301.2 154.136 2
 -3 7 4 121.43 51.6972 33
 -3 7 3 1455.24 136.525 9
 3 -7 -3 1727.75 270.732 29
 3 -7 -3 1820.09 316.471 27
 -3 7 3 1735.26 296.22 2
 3 -7 -3 1032.41 254.968 25
 -3 7 3 1580.05 139.602 33
 3 -7 -2 1801.7 290.83 27
 -3 7 2 1508.72 269.733 4
 3 -7 -2 1966.28 302.793 25
 3 -7 -2 1442.77 260.303 29
 -3 7 2 1427.4 259.835 2
 -3 7 1 13118.1 737.333 4
 3 -7 -1 12902.3 723.397 29
 3 -7 -1 14060.8 739.098 25
 -3 7 1 13791.3 762.405 2
 3 -7 -1 12028.6 715.267 27
 3 -7 0 372.069 137.637 27
 3 -7 0 656.264 207.346 29
 -3 7 0 522.092 169.66 4
 3 -7 0 768.693 171.22 25
 -3 7 0 601.17 174.731 2
 3 -7 1 15288.8 779.128 27
 -3 7 -1 14361.7 772.681 4
 3 -7 1 14481.9 758.908 29
 3 -7 1 14707.2 734.681 26
 3 -7 2 6223.75 530.186 29
 -3 7 -2 5434.37 482.509 4
 3 -7 2 6044.47 497.926 27
 3 -7 2 6460.74 489.866 26
 -3 7 -2 6413.49 500.485 3
 3 -7 3 2751.37 391.008 29
 -3 7 -3 2962.69 379.473 4
 3 -7 3 2919.83 352.164 26
 -3 7 -3 2745.42 338.822 3
 3 -7 3 2589.59 330.476 27
 3 -7 4 1619.37 260.394 27
 -3 7 -4 1636.15 316.964 4
 -3 7 -4 1395.21 268.444 3
 3 -7 4 1462.39 278.242 29
 3 -7 4 1559.08 289.069 26
 3 -7 5 1190.07 336.261 29
 3 -7 5 1151.91 308.432 26
 -3 7 -5 1132.14 234.552 4
 3 -7 5 1235.93 251.025 27
 -3 7 -5 1188.64 255.631 3
 3 -7 6 1132.29 321.576 29
 3 -7 6 1743.37 410.618 26
 -3 7 -6 1414.63 138.387 13
 -3 7 -6 1130.94 255.347 4
 -3 7 -6 1392.43 129.856 12
 -3 7 -6 1506.48 137.833 34
 3 -7 6 1375.04 137.591 17
 -3 7 -6 1512.35 298.94 3
 -3 7 -6 1415.13 134.876 35
 3 -7 7 1139.91 368.683 26
 -3 7 -7 987.752 230.823 4
 -3 7 -7 792.086 110.826 13
 -3 7 -7 998.495 119.339 12
 -3 7 -7 857.063 110.803 35
 3 -7 7 284.602 220.511 29
 3 -7 7 906.451 118.478 17
 -3 7 -7 1519.11 333.205 3
 -3 7 -7 806.182 107.497 34
 -3 7 -8 341.352 82.9897 13
 -3 7 -8 205.397 64.5325 12
 3 -7 8 297.048 73.4865 37
 -3 7 -8 264.966 73.0908 35
 -3 7 -8 388.448 79.7522 34
 3 -7 8 327.72 83.7052 17
 3 -7 9 2.12638 44.4812 37
 3 -7 9 34.7793 60.6484 17
 -3 7 -9 -64.2687 55.9393 13
 -3 7 -9 -27.5142 36.507 12
 -3 7 -9 -12.0286 48.5635 35
 -3 7 -9 -24.6005 29.7924 34
 -3 7 -10 631.659 86.4343 34
 -3 7 -10 571.564 85.7668 13
 3 -7 10 574.97 99.5769 17
 -3 7 -10 416.971 77.2173 12
 3 -7 10 698.84 92.5408 37
 -3 7 -10 542.229 88.1223 35
 -3 7 -11 884.385 92.8465 12
 3 -7 11 862.996 86.3767 37
 -3 7 -11 756.825 82.3994 35
 3 -7 11 826.138 101.49 17
 3 -7 12 175.842 34.1237 37
 -3 7 -12 251.659 43.4864 12
 3 -7 12 296.735 57.3677 17
 -3 6 11 -10.4992 27.8794 14
 -3 6 11 -21.5103 23.6048 23
 3 -6 -11 23.4878 13.656 39
 -3 6 11 10.7887 20.5361 21
 3 -6 -11 33.1622 28.7042 35
 -3 6 10 1379.36 93.126 24
 -3 6 10 1418.51 119.919 23
 -3 6 10 1367.9 108.812 21
 3 -6 -10 1386.27 120.314 35
 -3 6 10 1377.54 118.463 18
 3 -6 -10 1373.09 106.464 39
 -3 6 10 1507.52 112.435 33
 -3 6 9 -3.27838 33.6962 24
 -3 6 9 18.0368 62.6436 23
 3 -6 -9 7.84696 34.8885 39
 3 -6 -9 -19.6678 75.868 35
 -3 6 9 25.7687 58.6008 18
 -3 6 9 3.04644 44.4226 33
 3 -6 -8 109.08 85.3713 35
 -3 6 8 159.967 63.7313 24
 -3 6 8 110.258 71.791 33
 -3 6 8 259.777 66.8127 20
 -3 6 8 56.4806 61.1499 18
 3 -6 -8 0.86745 46.0659 39
 -3 6 7 103.948 47.8918 24
 -3 6 7 120.019 65.9295 19
 -3 6 7 115.208 63.4097 20
 -3 6 7 115.442 69.5727 18
 -3 6 7 138.975 70.3153 33
 3 -6 -7 191.495 68.837 39
 3 -6 -6 7436.98 622.165 27
 -3 6 6 8084.84 656.678 2
 3 -6 -6 8170.19 680.371 25
 -3 6 6 7525.89 318.587 19
 -3 6 6 7884.16 323.463 33
 -3 6 6 7950.45 312.915 20
 3 -6 -6 7381.7 310.352 39
 -3 6 6 7887.3 327.108 18
 -3 6 5 940.108 115.258 33
 -3 6 5 1004.39 118.523 19
 3 -6 -5 1058.54 261.709 25
 -3 6 5 833.763 206.602 2
 -3 6 5 767.609 98.9225 18
 3 -6 -4 46.2606 48.8576 29
 3 -6 -4 -63.1496 114.48 27
 3 -6 -4 -100.417 146.464 25
 -3 6 4 -134.241 135.21 2
 3 -6 -3 24898.6 946.816 29
 3 -6 -3 22530.1 959.289 27
 -3 6 3 23072.7 966.843 2
 3 -6 -3 22687.7 967.223 25
 -3 6 3 25913.9 955.009 30
 -3 6 2 -101.184 77.3881 30
 3 -6 -2 231.152 89.2027 29
 3 -6 -2 -15.1906 110.574 27
 3 -6 -2 44.1827 122.48 25
 -3 6 2 253.881 97.1968 1
 -3 6 2 39.6157 79.8055 2
 -3 6 1 3699.64 367.383 30
 3 -6 -1 3220.58 324.459 25
 -3 6 1 3419.8 352.612 2
 3 -6 -1 3204.36 355.685 27
 -3 6 1 4082.44 352.588 1
 3 -6 -1 3548.85 348.817 29
 -3 6 0 7482.89 505.106 30
 3 -6 0 7394.71 484.14 29
 3 -6 0 7032.8 483.236 27
 3 -6 0 8537.98 484.982 25
 -3 6 0 7337.68 494.095 2
 -3 6 0 8350.46 498.289 1
 -3 6 0 7684 525.318 4
 -3 6 -1 48.0815 102.607 30
 3 -6 1 219.148 127.72 27
 3 -6 1 206.696 93.058 26
 -3 6 -1 101.599 144.297 4
 3 -6 1 218.199 72.1512 25
 -3 6 -1 73.4287 63.7586 1
 3 -6 1 27.1354 120.979 29
 3 -6 2 2384.45 324.961 29
 3 -6 2 3068.85 311.966 26
 -3 6 -2 3075.78 342.399 4
 3 -6 2 3311.35 329.853 27
 3 -6 3 149.066 179.867 29
 3 -6 3 167.675 94.7068 26
 -3 6 -3 18.7861 107.173 3
 -3 6 -3 9.14207 104.406 4
 3 -6 4 1478.73 326.282 29
 3 -6 4 1158.68 262.35 26
 -3 6 -4 1341.94 255.577 4
 -3 6 -4 1861.18 295.332 3
 3 -6 4 1502.23 241.451 27
 3 -6 5 -223.788 215.672 29
 3 -6 5 -106.873 86.9084 27
 -3 6 -5 -91.3231 70.3682 4
 -3 6 -5 -317.52 173.147 3
 3 -6 6 7669.54 755.521 29
 -3 6 -6 8433.85 629.452 4
 3 -6 6 8100.98 799.555 26
 -3 6 -6 8331.22 660.875 3
 3 -6 7 -21.7751 35.994 17
 3 -6 7 246.66 216.071 29
 -3 6 -7 -41.9401 89.2027 4
 -3 6 -7 -20.1309 42.6281 13
 3 -6 7 -118.09 51.4149 37
 -3 6 -7 -119.254 47.9153 12
 -3 6 -7 47.4047 97.1609 3
 -3 6 -7 -34.6742 42.267 35
 -3 6 -7 147.561 60.2487 34
 -3 6 -8 1472.3 139.453 35
 3 -6 8 1315.74 142.113 17
 3 -6 8 1263.93 311.988 26
 -3 6 -8 1483.75 142.419 13
 -3 6 -8 1381.66 276.345 4
 -3 6 -8 1427.71 132.482 12
 3 -6 8 1513.31 141.663 37
 -3 6 -8 1471.86 140.185 34
 3 -6 9 67.7429 62.4228 17
 -3 6 -9 189.31 64.2012 12
 -3 6 -9 276.041 65.6185 13
 3 -6 9 96.6204 58.0248 37
 -3 6 -9 160.755 54.2603 35
 -3 6 -9 180.271 57.4854 34
 3 -6 10 573.88 102.436 17
 -3 6 -10 450.785 76.6222 13
 -3 6 -10 424.079 86.3121 12
 3 -6 10 296.079 77.6563 37
 -3 6 -10 430.78 86.05 35
 -3 6 -10 501.487 81.2258 34
 -3 6 -11 614.341 77.1127 35
 -3 6 -11 586.673 84.417 12
 -3 6 -11 642.966 75.3865 34
 3 -6 11 633.187 95.7093 17
 3 -6 11 639.383 87.3809 37
 3 -6 12 139.195 51.4019 17
 -3 6 -12 241.727 49.4213 12
 3 -6 12 182.373 44.0125 37
 -3 6 -12 190.402 34.9657 35
 -3 5 12 558.939 49.6633 14
 -3 5 12 646.473 53.6608 21
 3 -5 -12 681.631 55.5082 35
 -3 5 11 -8.11962 30.0397 24
 -3 5 11 83.0962 49.901 23
 3 -5 -11 54.8245 33.8619 39
 3 -5 -11 33.5743 43.4131 35
 -3 5 11 0.73297 40.5651 18
 -3 5 10 2082.15 146.417 24
 -3 5 10 2062.1 156.045 23
 3 -5 -10 1906.91 142.834 39
 -3 5 10 2045.59 129.402 38
 -3 5 10 1816.5 151.162 18
 -3 5 10 2067.96 145.044 33
 3 -5 -10 1974.73 158.906 35
 -3 5 9 181.413 75.2637 18
 -3 5 9 264.423 67.804 24
 -3 5 9 187.798 68.9208 23
 3 -5 -9 284.421 76.6536 39
 3 -5 -9 212.502 86.5453 35
 -3 5 9 190.057 68.5916 33
 -3 5 8 546.229 90.3479 24
 3 -5 -8 391.912 90.8679 39
 -3 5 8 485.177 90.4367 19
 -3 5 8 490.984 96.7961 33
 3 -5 -8 610.134 122.872 35
 -3 5 8 444.509 96.1452 18
 3 -5 -7 609.509 189.893 27
 3 -5 -7 -39.2384 124.561 25
 -3 5 7 333.127 66.9857 24
 3 -5 -7 237.185 72.4317 39
 3 -5 -7 299.414 66.1284 17
 -3 5 7 582.111 174.935 2
 -3 5 7 242.641 76.664 18
 -3 5 7 322.786 70.6681 19
 -3 5 7 204.959 62.0548 33
 3 -5 -6 4729.74 472.064 27
 3 -5 -6 3850.36 450.625 25
 -3 5 6 4522.89 230.256 24
 3 -5 -6 4139.36 225.63 39
 -3 5 6 3667.34 414.309 2
 -3 5 6 4198.43 227.907 19
 -3 5 6 4178.52 228.291 33
 -3 5 6 4122 226.941 18
 3 -5 -6 3658.5 206.331 17
 -3 5 5 2900.91 355.263 2
 3 -5 -5 4105 426.642 27
 3 -5 -5 3613.3 413.946 25
 -3 5 4 173.795 73.4551 1
 3 -5 -4 -10.6364 53.293 27
 3 -5 -4 -107.453 135.686 25
 -3 5 4 192.338 131.712 2
 -3 5 3 3823.35 346.557 30
 3 -5 -3 2965.12 293.219 29
 3 -5 -3 3233.71 335.47 27
 -3 5 3 3202.51 336.379 2
 3 -5 -3 3432.93 362.768 25
 -3 5 3 2781.69 282.055 1
 3 -5 -2 -133.641 87.5668 29
 3 -5 -2 64.928 94.4278 27
 -3 5 2 104.983 86.6594 2
 -3 5 2 -120.055 78.3234 30
 3 -5 -2 250.411 139.767 25
 -3 5 2 36.1846 31.747 1
 -3 5 1 861.419 170.404 1
 3 -5 -1 629.504 148.802 27
 3 -5 -1 1016.75 182.176 25
 3 -5 -1 1050.07 175.913 29
 -3 5 1 966.004 165.33 2
 -3 5 1 1002.44 184.737 30
 3 -5 0 5969.3 387.486 29
 3 -5 0 5844.38 366.185 25
 -3 5 0 5224.9 371.267 2
 3 -5 0 5413.16 398.572 27
 -3 5 0 5683.31 406.116 30
 -3 5 0 6112.28 401.746 1
 3 -5 1 797.827 176.533 29
 3 -5 1 928.76 167.019 26
 3 -5 1 822.283 127.988 25
 3 -5 1 575.091 162.362 27
 -3 5 -1 660.966 170.335 30
 -3 5 -1 802.539 182.767 4
 -3 5 -1 625.917 153.271 1
 -3 5 -2 8120.1 502.302 30
 3 -5 2 7467.81 513.775 29
 -3 5 -2 7711.98 500.784 4
 3 -5 2 7503.33 473.086 27
 3 -5 2 8261.89 461.498 26
 3 -5 3 33585.9 1198.09 29
 -3 5 -3 33830.6 1069.55 4
 3 -5 3 34373 1073.26 26
 3 -5 3 33838.1 1021.96 27
 3 -5 4 7099.44 640.556 29
 -3 5 -4 7039.87 508.863 4
 3 -5 4 6805.14 488.2 27
 3 -5 4 7072.5 586.969 26
 -3 5 -4 7442.62 540.128 3
 3 -5 5 1991.91 413.989 29
 3 -5 5 1647.28 347.614 26
 -3 5 -5 1891.26 278.307 4
 -3 5 -5 1837.97 292.043 3
 3 -5 6 300.122 249.831 26
 -3 5 -6 33.4337 92.3702 4
 -3 5 -6 257.688 151.131 3
 3 -5 6 15.0249 186.596 29
 3 -5 7 128.822 56.237 17
 3 -5 7 164.258 55.2445 37
 3 -5 7 191.223 62.8257 24
 -3 5 -7 59.7288 149.552 4
 -3 5 -7 -35.0312 37.6051 13
 -3 5 -7 217.72 50.8001 12
 -3 5 -7 119.183 44.7046 39
 -3 5 -7 113.726 42.4082 34
 -3 5 -7 299.472 178.173 3
 -3 5 -7 130.922 49.7475 35
 3 -5 7 197.935 154.876 29
 3 -5 8 3944.12 519.98 29
 3 -5 8 3864.41 508.343 26
 -3 5 -8 3498.36 209.116 34
 3 -5 8 3971.28 222.528 24
 -3 5 -8 3753.1 213.947 13
 -3 5 -8 3423.62 438.255 4
 -3 5 -8 3418.2 214.004 39
 -3 5 -8 3400.41 212.372 12
 -3 5 -8 3665.24 212.676 35
 3 -5 8 3797.28 225.287 37
 -3 5 -8 3701.88 467.425 3
 3 -5 8 3630.12 229.922 17
 3 -5 9 488.547 94.768 17
 3 -5 9 459.02 83.8872 24
 -3 5 -9 482.713 91.7559 34
 -3 5 -9 384.667 89.2612 39
 -3 5 -9 441.775 86.7042 12
 3 -5 9 507.496 96.6606 37
 -3 5 -9 486.74 91.7819 35
 -3 5 -10 1313.05 135.696 12
 3 -5 10 1506.63 143.663 37
 3 -5 10 1563.85 152.366 17
 -3 5 -10 1680.58 142.182 35
 -3 5 -10 1545.18 136.277 34
 3 -5 11 479.51 84.6149 17
 3 -5 11 591.036 86.0575 37
 -3 5 -11 481.586 84.2466 12
 -3 5 -11 590.042 77.019 34
 -3 5 -11 511.393 71.4048 35
 3 -5 12 222.473 54.7132 17
 3 -5 12 256.141 51.4298 37
 -3 5 -12 224.914 54.2626 12
 -3 4 12 2273.4 120.5 24
 3 -4 -12 2029.2 111.829 12
 -3 4 12 2372.2 118.948 23
 3 -4 -12 2158.87 119.329 39
 -3 4 12 2030.02 100.222 38
 3 -4 -12 2146.35 121.887 35
 -3 4 11 205.846 63.1028 24
 -3 4 11 223.933 61.8783 23
 3 -4 -11 214.758 72.4603 35
 -3 4 11 170.084 57.4527 18
 3 -4 -11 194.045 61.1488 39
 -3 4 11 230.287 54.1624 38
 -3 4 10 624.647 99.6309 24
 -3 4 10 477.259 94.255 23
 -3 4 10 618.138 91.9108 33
 3 -4 -10 624.191 100.405 39
 -3 4 10 635.425 89.9896 38
 3 -4 -10 571.169 101.297 35
 -3 4 10 494.409 96.537 18
 -3 4 9 6432.4 279.212 38
 -3 4 9 6159.87 285.682 24
 3 -4 -9 5882.01 277.21 39
 -3 4 9 6315.84 296.247 18
 3 -4 -9 6053 299.038 35
 -3 4 9 6168.59 276.359 33
 -3 4 8 -23.3881 45.6015 24
 -3 4 8 40.6048 50.0219 19
 3 -4 -8 -57.7062 49.8137 39
 -3 4 8 -37.0504 49.8618 33
 -3 4 8 -46.0524 59.7827 2
 3 -4 -8 31.6056 64.5068 35
 -3 4 8 30.6478 60.0183 18
 -3 4 8 102.018 36.6195 38
 3 -4 -8 -59.3948 79.2779 25
 3 -4 -7 423.364 156.377 27
 3 -4 -7 160.792 58.0089 17
 3 -4 -7 431.012 175.503 25
 -3 4 7 190.351 47.3822 24
 -3 4 7 -11.4371 66.55 2
 -3 4 7 244.801 50.1235 19
 3 -4 -7 174.347 59.2354 39
 -3 4 7 194.383 57.3425 18
 -3 4 7 278.074 74.2692 33
 3 -4 -6 6070.05 499.993 28
 -3 4 6 6483.05 520.303 2
 3 -4 -6 6771.3 514.91 27
 -3 4 6 6868 493.236 1
 3 -4 -6 6044.75 541.306 25
 3 -4 -5 11546.1 638.319 27
 -3 4 5 12304.6 618.399 1
 -3 4 5 12717.5 598.641 30
 -3 4 5 10864.5 616.922 2
 3 -4 -5 11357.9 676.88 25
 -3 4 4 33729.2 961.626 30
 -3 4 4 32264.8 974.293 2
 3 -4 -4 32906.3 991.241 27
 3 -4 -4 33431.8 1074.37 25
 -3 4 4 32638.9 950.458 1
 -3 4 3 22185 762.904 30
 3 -4 -3 20670.1 742.609 27
 3 -4 -3 20738.5 792.189 25
 -3 4 3 21299.8 739.642 1
 -3 4 3 21051.7 732.545 2
 -3 4 2 24991.7 788.681 30
 3 -4 -2 26177 693.768 29
 3 -4 -2 25040.9 779.533 27
 -3 4 2 25633 758.734 2
 3 -4 -2 24561.5 790.67 25
 -3 4 2 25348.8 774.939 1
 3 -4 -1 5435.39 315.827 29
 3 -4 -1 5646.32 367.75 27
 -3 4 1 5666.43 346.77 2
 3 -4 -1 5193.53 344.781 25
 -3 4 1 5597.24 360.313 1
 -3 4 1 5355.15 368.511 30
 3 -4 0 55916.4 1129.2 27
 -3 4 0 55303.8 1139.61 30
 3 -4 0 56279.9 1056.6 29
 3 -4 0 56860 1042.27 25
 -3 4 0 56797.6 1063.75 2
 -3 4 0 56348 1125.26 1
 -3 4 -1 10053.2 511.16 4
 3 -4 1 9404.95 487.789 29
 3 -4 1 9364.24 481.22 27
 3 -4 1 9817.07 410.051 26
 -3 4 -1 9594.46 484.821 30
 3 -4 1 9558.3 405.584 25
 -3 4 -1 9577.98 477.021 1
 -3 4 -2 399.25 123.291 30
 -3 4 -2 583.047 109.509 28
 3 -4 2 496.371 149.472 27
 3 -4 2 634.837 153.931 26
 -3 4 -2 595.495 148.849 4
 -3 4 -2 620.115 152.834 1
 3 -4 2 701.74 212.09 29
 -3 4 -3 22164.8 772.237 30
 3 -4 3 21709.5 958.304 29
 -3 4 -3 23976.1 668.558 28
 -3 4 -3 22761.4 807.093 4
 3 -4 3 22350.2 880.301 26
 3 -4 3 22914.4 818.234 27
 -3 4 -4 1514.29 245.506 4
 3 -4 4 1785.24 353.038 29
 -3 4 -4 1849.57 208.03 28
 3 -4 4 1438.37 224.665 27
 3 -4 4 1610.29 316.593 26
 -3 4 -4 1757.8 268.966 3
 -3 4 -5 18699.3 828.583 4
 3 -4 5 16611.1 956.764 26
 -3 4 -5 18349.6 725.004 28
 -3 4 -5 18158.8 852.945 3
 3 -4 5 17237.8 961.47 29
 3 -4 6 27.1479 163.243 29
 -3 4 -6 -16.5245 93.7292 28
 3 -4 6 109.862 97.6005 26
 -3 4 -6 140.286 87.8621 4
 -3 4 -6 141.654 112.383 3
 -3 4 -7 5416.23 496.702 4
 3 -4 7 6579.53 279.846 24
 3 -4 7 7146.78 652.775 26
 3 -4 7 6445.81 282.057 37
 -3 4 -7 6435.27 279.221 12
 -3 4 -7 6688 280.111 39
 -3 4 -7 5957.9 556.329 3
 -3 4 -7 6113.03 265.277 34
 3 -4 7 6109.41 611.814 29
 3 -4 8 656.324 198.951 26
 3 -4 8 789.121 109.123 24
 -3 4 -8 851.251 113.535 12
 -3 4 -8 809.423 109.077 39
 3 -4 8 735.303 100.245 38
 3 -4 8 852.236 112.383 37
 -3 4 -8 732.984 101.455 35
 -3 4 -8 632.989 190.076 3
 -3 4 -8 889.825 113.317 34
 3 -4 9 1727.03 156.704 24
 -3 4 -9 1579.68 149.442 12
 3 -4 9 1950.9 155.853 38
 -3 4 -9 1889.66 161.378 39
 3 -4 9 1704.88 160.348 37
 -3 4 -9 1828.51 150.014 35
 -3 4 -9 1882.72 160.39 34
 3 -4 9 1951.21 166.7 17
 3 -4 10 123.611 59.3044 17
 3 -4 10 101.157 56.8909 24
 -3 4 -10 -64.355 61.9019 12
 -3 4 -10 -37.8941 47.657 39
 3 -4 10 0.25619 39.8329 38
 3 -4 10 33.3094 58.4684 37
 -3 4 -10 15.0827 47.3396 35
 -3 4 -10 155.718 56.028 34
 3 -4 11 513.002 84.087 17
 -3 4 -11 608.57 92.7091 12
 3 -4 11 412.502 63.1696 38
 3 -4 11 561.382 89.0736 37
 -3 4 -11 519.361 68.4284 35
 -3 4 -11 543.746 78.3291 34
 3 -4 12 414.732 58.5956 17
 -3 4 -12 426.84 66.9304 12
 3 -4 12 450.403 66.0871 37
 3 -4 12 416.49 50.2004 38
 -3 3 13 -9.37105 18.4319 14
 -3 3 13 13.7627 24.3155 24
 3 -3 -13 -45.6007 30.6986 35
 3 -3 -13 14.3672 23.2763 39
 -3 3 13 37.3269 20.7946 38
 3 -3 -12 1860.96 132.015 35
 -3 3 12 1912.27 127.53 38
 -3 3 12 1920.73 134.149 24
 -3 3 12 2131.94 127.942 23
 3 -3 -12 1859.04 129.176 39
 -3 3 11 -102.971 50.7839 38
 -3 3 11 0.53655 51.0498 24
 -3 3 11 19.2834 47.4254 23
 3 -3 -11 19.6797 59.833 39
 3 -3 -11 -18.4599 56.7048 35
 -3 3 11 66.4132 38.9468 18
 -3 3 10 4298.49 217.411 33
 -3 3 10 3908.16 228.428 18
 -3 3 10 3856.79 226.661 24
 -3 3 10 4083.21 232.268 23
 3 -3 -10 3730.4 227.637 35
 3 -3 -10 4051.14 232.176 39
 -3 3 10 3941.45 224.644 38
 -3 3 10 4347.8 221.48 37
 -3 3 9 807.717 112.64 18
 -3 3 9 927.93 118.443 24
 3 -3 -9 757.621 112.876 39
 -3 3 9 843.251 113.516 38
 -3 3 9 890.14 105.986 37
 3 -3 -9 902.107 128.514 35
 -3 3 9 876.616 107.761 33
 -3 3 8 23626 1063.1 2
 3 -3 -8 23633.3 1095.78 28
 -3 3 8 24319 537.413 38
 3 -3 -8 25634.3 1148.79 25
 -3 3 8 24395.6 555.576 24
 3 -3 -8 23991.2 550.572 39
 -3 3 8 25066.9 562.597 18
 3 -3 -8 25003.4 594.537 35
 -3 3 8 24021.7 549.678 19
 -3 3 8 24188 528.586 33
 3 -3 -7 2902.59 352.101 28
 3 -3 -7 2885.48 376.957 25
 -3 3 7 2525.93 332.484 2
 -3 3 7 2476.71 314.614 1
 3 -3 -6 3742.01 351.318 27
 3 -3 -6 2828.36 365.241 25
 3 -3 -6 3056.66 348.268 28
 -3 3 6 3554.06 357.52 2
 -3 3 6 3135.55 341.455 1
 3 -3 -5 1303.48 213.75 31
 -3 3 5 1461.99 222.931 30
 3 -3 -5 1411.63 201.487 27
 3 -3 -5 1111.04 212.126 25
 -3 3 5 1091.01 188.822 2
 -3 3 5 972.987 190.744 1
 3 -3 -5 938.796 180.433 28
 -3 3 4 41452.5 1030.92 30
 -3 3 4 41498.9 983.093 2
 3 -3 -4 41848.5 992.355 27
 -3 3 4 40051 1009.9 1
 3 -3 -4 42115 1117.46 25
 -3 3 3 25106.2 767.159 30
 3 -3 -3 24852.5 723.326 27
 3 -3 -3 26946.5 600.053 29
 3 -3 -3 26808.3 825.118 25
 -3 3 3 25870.6 763.693 1
 -3 3 3 25884.9 701.405 2
 -3 3 2 9582.71 461.544 30
 3 -3 -2 10067.6 350.292 29
 3 -3 -2 9925.48 440.376 27
 -3 3 2 9603.84 397.733 2
 3 -3 -2 9948.84 468.086 25
 -3 3 2 10350.8 460.926 1
 3 -3 -2 9779.29 254.439 6
 -3 3 1 2684.05 246.989 30
 3 -3 -1 2605.86 191.255 29
 3 -3 -1 2687.05 234.339 27
 -3 3 1 2536.84 200.115 2
 -3 3 1 2531.64 234.155 1
 3 -3 -1 2602.77 235.179 25
 -3 3 0 32085.4 792.414 30
 3 -3 0 33073.3 761.32 29
 3 -3 0 33700.3 807.961 27
 3 -3 0 34107.9 580.534 26
 -3 3 0 33579.7 814.198 1
 3 -3 0 32186.7 738.881 25
 3 -3 1 21969.2 737.432 29
 3 -3 1 23193.9 704.302 27
 3 -3 1 23672.5 588.495 26
 -3 3 -1 22490.9 680.113 1
 -3 3 -1 21576.7 652.887 30
 -3 3 -2 1716.57 197.928 30
 -3 3 -2 1612.27 211.124 1
 -3 3 -2 1608.52 205.325 4
 3 -3 2 1452.4 261.165 29
 -3 3 -2 1682.2 185.752 28
 3 -3 2 1814.88 217.455 27
 3 -3 2 1575.39 213.919 26
 3 -3 3 32807.4 1111.81 29
 -3 3 -3 32906.2 844.182 28
 -3 3 -3 35403.2 937.195 4
 3 -3 3 33845.7 953.241 27
 3 -3 3 31170.7 1019.77 26
 -3 3 -3 34336.2 861.58 30
 -3 3 -4 315.01 103.889 28
 3 -3 4 483.065 211.238 26
 -3 3 -4 393.335 122.318 4
 -3 3 -4 336.026 149.804 3
 3 -3 4 612.621 142.689 31
 3 -3 4 618.053 223.872 29
 -3 3 -5 11812.2 623.916 28
 -3 3 -5 12685.8 643.142 4
 3 -3 5 13180.8 766.383 26
 -3 3 -5 12073.1 670.072 3
 3 -3 5 13073 769.432 29
 3 -3 6 2046.24 340.154 29
 -3 3 -6 1767.9 270.281 28
 3 -3 6 1835.11 310.662 26
 -3 3 -6 1695.67 249.757 4
 -3 3 -6 1710.47 289.788 3
 3 -3 7 2240.82 366.591 29
 3 -3 7 2469.69 361.234 26
 3 -3 7 2819.91 187.254 24
 3 -3 7 2475.28 178.437 23
 -3 3 -7 2532.03 177.945 12
 -3 3 -7 2506.09 170.217 39
 3 -3 7 2883.82 192.072 37
 -3 3 -7 2622.69 352.02 28
 3 -3 7 2648.6 177.685 38
 -3 3 -7 2633.54 360.009 3
 -3 3 -7 2605.45 176.095 34
 -3 3 -8 3787.61 437.308 28
 3 -3 8 3802.15 221.006 38
 3 -3 8 4361.36 498.371 26
 3 -3 8 3901.48 230.205 24
 3 -3 8 3690.82 223.702 23
 -3 3 -8 3694.45 219.382 12
 -3 3 -8 4146.18 227.924 39
 3 -3 8 3855.96 231.845 37
 3 -3 8 3937.03 214.291 20
 3 -3 8 4040.46 496.888 29
 -3 3 -8 4094.02 229.777 34
 3 -3 8 4280.91 514.88 2
 -3 3 -9 469.787 85.7298 35
 3 -3 9 343.172 82.2821 24
 3 -3 9 303.573 80.0326 23
 3 -3 9 511.763 90.8602 17
 -3 3 -9 391.646 82.8722 12
 -3 3 -9 463.445 82.1654 39
 3 -3 9 409.827 82.9012 38
 3 -3 9 384.537 88.622 37
 -3 3 -9 448.614 88.9116 34
 -3 3 -10 1028.51 110.098 35
 3 -3 10 816.509 113.769 24
 -3 3 -10 1119.93 131.676 12
 -3 3 -10 1066.5 115.894 39
 3 -3 10 962.489 113.212 38
 3 -3 10 852.603 115.1 37
 -3 3 -10 854.575 106.775 34
 3 -3 10 959.217 114.85 17
 3 -3 11 1245.75 120.777 37
 -3 3 -11 1293.51 110.934 34
 -3 3 -11 1279.01 124.289 12
 3 -3 11 1230.94 110.404 38
 3 -3 11 1062.06 103.87 17
 -3 3 -12 1561.89 108.013 12
 3 -3 12 1374.64 89.0806 38
 3 -3 12 1170.65 76.8906 17
 3 -3 12 1454.61 102.789 37
 -3 2 13 19.6189 39.1696 24
 -3 2 13 73.5681 39.6761 38
 3 -2 -13 -42.3832 33.5383 39
 3 -2 -13 21.7465 20.409 12
 3 -2 -13 43.9683 40.8132 35
 -3 2 12 613.447 95.7067 24
 -3 2 12 650.141 75.3448 23
 3 -2 -12 646.051 79.2253 12
 -3 2 12 662.544 96.6788 38
 -3 2 12 566.332 77.4748 37
 3 -2 -12 644.886 94.4993 35
 3 -2 -12 631.084 90.34 39
 -3 2 11 1094.75 127.227 24
 -3 2 11 920.302 106.132 23
 3 -2 -11 916.633 119.515 35
 3 -2 -11 1026.07 127.482 39
 -3 2 11 1038.12 122.965 38
 -3 2 11 1017.19 115.009 37
 -3 2 11 917.886 114.066 18
 -3 2 10 141.899 69.4847 24
 -3 2 10 115.604 63.7486 38
 -3 2 10 100.746 51.9511 23
 3 -2 -10 129.45 68.8808 35
 -3 2 10 123.043 54.2183 37
 3 -2 -10 138.12 71.4733 39
 -3 2 10 159.353 63.0228 18
 3 -2 -10 164.751 57.661 10
 -3 2 9 1869.85 161.284 24
 3 -2 -9 1855.59 153.534 10
 3 -2 -9 1930.92 166.352 39
 -3 2 9 2072.69 166.892 19
 -3 2 9 1917.51 161.156 18
 3 -2 -9 1746.72 163.406 35
 -3 2 9 1776.45 155.195 38
 3 -2 -8 11088.6 722.482 25
 -3 2 8 11825.4 717.749 2
 3 -2 -8 10517.7 717.035 28
 -3 2 8 11869.8 718.911 1
 -3 2 8 11361.7 367.907 24
 3 -2 -8 11074.8 365.679 39
 -3 2 8 10856.2 352.613 38
 3 -2 -8 11232.7 381.991 35
 -3 2 7 6366.82 495.908 26
 -3 2 7 7038.13 506.784 2
 3 -2 -7 6077.95 504.619 28
 -3 2 7 6184.13 485.475 1
 3 -2 -7 5811.16 485.095 25
 -3 2 6 6815.67 444.333 30
 -3 2 6 7354.72 463.297 2
 3 -2 -6 6732.93 490.953 28
 -3 2 6 7047.44 482.459 1
 3 -2 -6 7699.29 432.808 27
 -3 2 6 6968.2 471.844 26
 3 -2 -6 6742.16 488.306 25
 -3 2 5 2559.74 282.772 30
 -3 2 5 2857.26 262.939 2
 3 -2 -5 2863.17 248.419 27
 -3 2 5 2368.67 263.497 1
 -3 2 5 2870.34 264.442 26
 3 -2 -5 2481.13 284.275 28
 3 -2 -5 2390.57 281.846 25
 3 -2 -5 3287.35 269.684 31
 -3 2 4 379.443 130.951 30
 -3 2 4 392.372 85.4138 2
 3 -2 -4 402.182 106.285 27
 3 -2 -4 308.571 140.651 25
 -3 2 4 354.196 117.156 1
 3 -2 -4 225.529 133.004 31
 3 -2 -3 13519.3 290.019 29
 3 -2 -3 13511.2 463.627 27
 -3 2 3 13217.8 416.767 2
 -3 2 3 13290.1 525.206 1
 3 -2 -3 13260 542.417 25
 -3 2 3 12667.8 538.89 30
 3 -2 -3 11774.1 567.951 31
 -3 2 2 1234.79 185.514 30
 3 -2 -2 1330.68 99.8292 29
 3 -2 -2 1221.61 111.782 6
 3 -2 -2 1227.64 147.526 27
 3 -2 -2 1239.69 170.622 25
 -3 2 2 1299.83 173.557 1
 -3 2 2 1272.29 119.609 2
 3 -2 -1 2166.94 169.401 29
 3 -2 -1 2382.77 95.3183 26
 3 -2 -1 2214.48 205.367 25
 -3 2 1 2388.25 216.457 1
 -3 2 1 2234.58 217.69 30
 3 -2 -1 2252.6 197.88 27
 3 -2 -1 2384.05 128.684 6
 -3 2 0 3077.26 239.242 30
 3 -2 0 2907.41 239.872 29
 3 -2 0 2882.92 235.591 27
 3 -2 0 2810.2 150.77 26
 -3 2 0 3240.27 239.499 1
 -3 2 -1 169.212 73.5046 30
 3 -2 1 167.344 111.236 27
 3 -2 1 310.634 94.9403 26
 -3 2 -1 270.508 91.4081 4
 -3 2 -1 314.151 96.5645 1
 3 -2 1 217.897 135.578 29
 3 -2 2 69466 1357.05 29
 -3 2 -2 66981.4 1155.24 1
 3 -2 2 70163.8 1252.2 27
 3 -2 2 62636.6 1241.53 31
 3 -2 2 67171.7 1154.46 26
 -3 2 -2 64997.4 1037.25 30
 -3 2 -2 68275.5 1174.84 28
 -3 2 -2 67861.7 1135.79 4
 3 -2 3 10445.5 479.093 31
 -3 2 -3 9956.72 495.137 28
 -3 2 -3 10439.9 473.939 4
 3 -2 3 10089.3 506.643 26
 3 -2 3 10697.4 588.502 29
 -3 2 -3 10955.2 432.582 30
 3 -2 4 11087.8 630.14 29
 -3 2 -4 9583.71 533.096 28
 -3 2 -4 10399.2 501.412 4
 3 -2 4 11108.1 599.376 26
 -3 2 -4 9715.04 543.648 3
 -3 2 -5 136.043 95.9508 25
 3 -2 5 -224.464 150.616 29
 -3 2 -5 -43.7689 82.8113 28
 3 -2 5 -386.663 156.872 26
 -3 2 -5 -62.7481 63.0742 4
 -3 2 -5 91.1015 62.6912 3
 -3 2 -6 1520.83 248.666 28
 3 -2 6 944.13 207.195 26
 3 -2 6 1276.98 271.204 29
 -3 2 -6 1910.64 271.662 3
 -3 2 -7 -143.632 91.5462 28
 3 -2 7 236.182 147.673 29
 3 -2 7 -160.912 89.7065 26
 3 -2 7 153.484 105.455 2
 3 -2 7 -97.0329 39.5714 23
 3 -2 7 -51.222 44.9892 38
 3 -2 7 -89.0071 44.9139 37
 -3 2 -7 -90.3708 40.3403 12
 3 -2 7 -4.15446 47.7671 20
 3 -2 7 -9.17445 42.6556 24
 -3 2 -8 8542.41 663.466 28
 3 -2 8 8562.19 704.497 2
 3 -2 8 9655.16 717.265 26
 3 -2 8 8621.93 338.567 24
 3 -2 8 8189.4 330.794 37
 3 -2 8 8626.3 347.875 23
 -3 2 -8 8426.75 330.458 12
 -3 2 -8 9430.81 333.708 39
 3 -2 8 8743.6 333.062 38
 3 -2 8 9149.85 717.006 5
 3 -2 8 8920.3 327.97 20
 -3 2 -9 526.002 100.887 12
 3 -2 9 425.685 90.6156 24
 3 -2 9 502.222 99.4171 23
 -3 2 -9 433.507 80.0753 39
 3 -2 9 455.937 89.6999 38
 3 -2 9 378.883 86.3229 37
 -3 2 -9 486.729 93.3608 34
 3 -2 9 500.915 82.9454 17
 3 -2 9 460.931 82.7024 20
 3 -2 10 2087.87 167.259 24
 -3 2 -10 2107.97 166.848 12
 3 -2 10 2110.75 150.818 17
 -3 2 -10 2260.28 164.091 34
 3 -2 10 2185.4 164.77 37
 -3 2 -10 1983.75 142.525 39
 3 -2 10 2256.1 165.763 38
 3 -2 11 1178.86 111.741 37
 -3 2 -11 1142.69 113.963 12
 3 -2 11 1130.99 106.68 38
 3 -2 11 1180.27 95.1341 17
 -3 2 -11 1039.01 98.7986 34
 -3 2 -12 70.7369 37.4244 12
 3 -2 12 61.0962 27.1794 38
 3 -2 12 54.9422 32.5373 37
 3 -1 -14 299.143 41.6007 39
 -3 1 14 283.32 40.4792 24
 -3 1 14 349.105 45.364 38
 3 -1 -14 388.834 46.76 35
 -3 1 13 478.602 75.4645 24
 3 -1 -13 453.76 71.1832 35
 3 -1 -13 439.765 74.3791 39
 -3 1 13 438.912 75.0878 38
 -3 1 13 454.81 63.6022 37
 -3 1 12 64.9703 67.0826 24
 3 -1 -12 48.6281 38.8613 12
 3 -1 -12 109.764 57.9331 39
 -3 1 12 14.1774 57.2823 38
 -3 1 12 10.1018 46.619 37
 3 -1 -12 -62.5128 55.2571 35
 -3 1 11 2147.69 172.2 38
 -3 1 11 2190.66 173.547 24
 -3 1 11 2230.63 171.619 37
 3 -1 -11 1981.78 164.289 35
 3 -1 -11 2298.51 175.704 10
 3 -1 -11 2308.58 179.036 39
 -3 1 10 4329.79 244.551 24
 3 -1 -10 4183.21 237.489 39
 -3 1 10 4204.84 239.305 38
 3 -1 -10 4274.61 239.037 10
 3 -1 -10 4387.24 240.991 35
 -3 1 10 4539.61 233.179 18
 -3 1 9 7126.34 586.394 1
 -3 1 9 7160.79 599.195 26
 -3 1 9 7356.82 307.063 24
 -3 1 9 6962.75 292.288 38
 3 -1 -9 6893.52 281.63 36
 3 -1 -9 7121.05 300.109 39
 3 -1 -9 7256.13 302.842 10
 3 -1 -9 6934.74 299.834 35
 -3 1 8 5505.3 473.109 2
 -3 1 8 4394.82 442.115 1
 3 -1 -8 4897.56 481.973 28
 -3 1 8 4849.69 454.422 26
 3 -1 -8 4851.56 430.955 25
 3 -1 -7 -62.1657 102.619 28
 -3 1 7 84.5622 98.3186 26
 3 -1 -7 -116.169 117.642 25
 -3 1 7 99.7913 92.9508 1
 -3 1 7 -159.509 90.3378 2
 -3 1 7 231.377 87.8119 30
 -3 1 6 48197.7 1216.55 30
 3 -1 -6 49509.7 1208.4 25
 -3 1 6 50405.7 1113.39 2
 -3 1 6 46103.2 1195.1 1
 3 -1 -6 45902.6 1220.69 28
 -3 1 6 46929.5 1136.24 26
 -3 1 5 10804.2 533.136 1
 3 -1 -5 12090.6 408.909 27
 -3 1 5 11414.3 488.484 26
 -3 1 5 11631.5 569.511 30
 3 -1 -5 11928.6 472.686 31
 3 -1 -5 11565.9 545.717 25
 -3 1 5 12539.2 477.404 2
 -3 1 4 12459.8 395.304 2
 3 -1 -4 12280 383.6 27
 -3 1 4 13099.7 437.117 26
 3 -1 -4 12054.8 518.643 25
 -3 1 4 12616.9 534.919 1
 -3 1 4 12451.3 554.809 30
 3 -1 -4 12489.8 494.453 31
 3 -1 -3 298.343 137.24 31
 3 -1 -3 229.292 66.2434 27
 -3 1 3 185.612 53.2462 26
 3 -1 -3 171.507 102.326 25
 -3 1 3 293.5 111.557 1
 -3 1 3 219.356 43.4176 2
 3 -1 -3 361.235 96.8868 6
 -3 1 3 394.053 137.342 30
 -3 1 2 41581.2 887.286 30
 3 -1 -2 42612.3 939.803 31
 -3 1 2 41108.1 835.373 1
 3 -1 -2 41312 846.485 25
 3 -1 -2 41230.8 455.283 5
 3 -1 -2 40153.6 695.015 27
 3 -1 -1 6681.91 308.528 27
 -3 1 1 6727.57 328.152 1
 3 -1 -1 7019.66 222.405 29
 3 -1 -1 6530.82 252.299 5
 -3 1 1 6360.06 350.153 30
 3 -1 -1 6914.35 397.689 31
 3 -1 0 47337.7 985.935 31
 3 -1 0 46924.3 777.532 29
 -3 1 0 44129.2 849.101 30
 3 -1 0 43140 834.638 27
 -3 1 0 46073.3 828.951 1
 -3 1 -1 9834.32 378.047 30
 -3 1 -1 10434.2 380.967 4
 3 -1 1 10794 447.912 29
 3 -1 1 10331.8 305.561 26
 3 -1 1 9958.35 451.185 31
 -3 1 -1 9960.11 400.075 1
 -3 1 -2 35416.1 674.99 30
 3 -1 2 34287.5 885.408 29
 -3 1 -2 34215.7 885.127 28
 -3 1 -2 35198.8 714.156 4
 3 -1 2 35502.5 740.692 26
 3 -1 2 32991.4 799.303 31
 3 -1 3 18923.6 734.9 29
 -3 1 -3 18948.3 716.305 28
 -3 1 -3 20430.6 578.41 4
 3 -1 3 20039.6 656.087 26
 -3 1 -3 19796.7 667.718 3
 3 -1 3 21590.6 612.66 31
 3 -1 4 8642.67 541.036 29
 -3 1 -4 8374.59 524.115 28
 -3 1 -4 9096.64 415.341 4
 3 -1 4 9134.72 510.086 26
 -3 1 -4 9191.37 491.675 3
 3 -1 5 584.439 177.908 29
 3 -1 5 302.456 129.999 26
 -3 1 -5 298.605 101.319 25
 3 -1 5 172.502 128.186 2
 -3 1 -5 296.749 144.68 28
 -3 1 -5 177.599 92.1705 3
 3 -1 6 23.876 73.6975 26
 3 -1 6 73.3352 125.672 2
 3 -1 7 1682.42 153.031 38
 3 -1 7 1701.43 283.04 26
 3 -1 7 1746.19 153.628 24
 3 -1 7 1644.59 150.769 23
 3 -1 7 1799.13 331.273 2
 -3 1 -7 1587.21 141.92 12
 3 -1 7 1492.48 296.001 5
 3 -1 7 1606.78 148.697 37
 3 -1 7 1594.79 144.231 20
 -3 1 -7 2344.34 337.733 28
 3 -1 8 1959.48 168.055 24
 -3 1 -8 1672.64 154.405 12
 3 -1 8 1971.58 170.521 38
 3 -1 8 1696.99 155.508 37
 3 -1 8 1730.88 163.415 23
 3 -1 8 1744.36 155.97 20
 3 -1 9 1482.12 147.373 24
 3 -1 9 1206.21 145.232 23
 -3 1 -9 1235.8 133.985 12
 3 -1 9 1422 143.953 38
 3 -1 9 1454.1 141.008 20
 3 -1 9 1323.21 134.147 37
 3 -1 10 60.4722 42.5494 20
 3 -1 10 -72.3531 56.6682 24
 3 -1 10 -14.7617 51.2863 23
 3 -1 10 22.4478 43.4898 37
 -3 1 -10 1.79239 55.7993 12
 3 -1 10 -7.05063 65.0617 38
 -3 1 -10 9.79495 49.3734 34
 3 -1 11 19.2003 35.6096 38
 -3 1 -11 48.4548 40.3288 34
 3 -1 11 69.389 38.9419 37
 -3 1 -11 35.3289 50.2749 12
 -3 1 -12 1658.18 88.4168 12
 3 -1 12 1674.82 85.7927 38
 -3 0 14 325.596 48.2879 24
 3 0 -14 400.436 55.9977 39
 -3 0 14 357.966 49.66 37
 -3 0 14 381.651 54.8127 38
 3 0 -14 401.933 54.9406 35
 -3 0 13 352.109 69.1333 24
 3 0 -13 333.316 74.8009 35
 -3 0 13 460.353 76.8537 37
 3 0 -13 442.433 79.0231 39
 -3 0 13 295.073 67.8149 38
 -3 0 12 1303.81 135.518 24
 3 0 -12 1310.73 119.304 13
 3 0 -12 1325.7 132.11 39
 -3 0 12 1272.5 133.29 38
 3 0 -12 1172.24 126.639 35
 -3 0 12 1378.82 135.11 37
 -3 0 11 5277.71 265.835 24
 3 0 -11 5283.49 265.363 39
 -3 0 11 5411.44 266.044 38
 3 0 -11 5406.52 270.958 10
 3 0 -11 5377.13 262.969 35
 -3 0 11 5420.06 266.408 37
 3 0 -10 -23.5579 55.9651 39
 -3 0 10 -53.9974 56.359 24
 -3 0 10 59.4688 134.146 1
 3 0 -10 144.909 168.558 6
 3 0 -10 -14.7168 51.4161 10
 -3 0 10 -15.1824 49.8337 38
 3 0 -10 50.6664 56.2143 35
 3 0 -10 -69.1629 51.0931 36
 -3 0 9 275.932 140.526 26
 -3 0 9 287.402 67.2837 24
 3 0 -9 347.173 68.9256 39
 3 0 -9 180.438 58.342 36
 3 0 -9 325.123 68.8539 35
 3 0 -9 356.255 70.9231 10
 -3 0 9 259.084 65.2835 38
 -3 0 8 3712.67 383.052 30
 -3 0 8 3040.72 372.783 1
 -3 0 8 3748.2 388.54 26
 -3 0 7 7067.08 440.31 2
 -3 0 7 6497.08 487.15 30
 -3 0 7 6745.99 491.001 26
 3 0 -7 6629.39 502.347 3
 -3 0 7 6326.41 477.183 1
 3 0 -7 6260.75 439.861 25
 -3 0 6 16363.1 719.394 30
 -3 0 6 16262.5 709.351 1
 -3 0 6 18364.7 605.91 2
 -3 0 6 17663.3 714.913 26
 3 0 -6 17021.1 663.911 25
 3 0 -6 17747.8 586.539 31
 3 0 -6 16736.4 739.045 3
 3 0 -5 1549.38 184.91 31
 -3 0 5 1831.08 215.189 26
 -3 0 5 1540.1 214.367 1
 3 0 -5 1894.94 213.875 25
 -3 0 5 1739.65 252.39 30
 -3 0 5 2290.6 178.516 2
 3 0 -5 1611.38 225.491 6
 3 0 -5 1206.83 202.374 3
 -3 0 4 5760.44 381.52 30
 -3 0 4 6266.77 224.432 2
 -3 0 4 5813.47 362.347 1
 3 0 -4 5534.43 334.554 31
 -3 0 4 6461.97 342.592 26
 3 0 -4 6129.65 353.864 25
 3 0 -4 5597.97 172.658 27
 3 0 -4 5741.29 359.38 6
 3 0 -3 -4.85804 112.745 31
 3 0 -3 -0.87845 34.3352 27
 -3 0 3 73.5804 56.0237 26
 3 0 -3 40.2674 76.8021 25
 -3 0 3 6.43014 80.578 1
 3 0 -3 -14.9545 80.9925 6
 -3 0 3 26.111 131.196 30
 -3 0 2 3411.9 237.219 1
 -3 0 2 3666.46 130.316 26
 3 0 -2 4026.32 291.043 31
 3 0 -2 3680.83 201.244 5
 -3 0 2 3781.87 278.752 30
 3 0 -2 3797.96 252.981 6
 3 0 -1 794.205 158.441 31
 -3 0 1 675.753 136.945 30
 -3 0 1 697.031 38.7695 26
 -3 0 1 876.464 120.345 1
 3 0 -1 806.895 131.656 6
 3 0 -1 835.642 118.712 5
 3 0 0 61005.3 1068.65 31
 -3 0 0 60203.2 978.229 30
 -3 0 0 60527.4 888.022 1
 3 0 0 61790.3 1022.08 6
 3 0 0 61423.5 1015.92 5
 -3 0 -1 3583.3 217.588 30
 -3 0 -1 3346.67 282.382 28
 3 0 1 3564.02 235.77 2
 -3 0 -1 3780.84 181.226 4
 3 0 1 3592.92 264.535 31
 -3 0 -1 3503.85 216.655 1
 -3 0 -2 6379.04 240.274 30
 3 0 2 6282.62 395.58 29
 -3 0 -2 6152.28 398.903 28
 -3 0 -2 6138.52 228.617 4
 3 0 2 5869.17 328.453 26
 3 0 2 5984.63 358.846 2
 3 0 2 6510.59 352.204 31
 3 0 3 371.007 87.9154 31
 3 0 3 439.12 151.176 5
 -3 0 -3 359.106 134.766 28
 3 0 3 316.945 115.832 26
 3 0 3 473.954 136.718 2
 -3 0 -3 234.442 75.7485 3
 -3 0 -4 7367.72 524.297 28
 3 0 4 7416.17 487.629 26
 -3 0 -4 7884.81 517.938 25
 3 0 4 6937.48 510.487 5
 3 0 4 7181.61 507.365 2
 3 0 5 440.404 167.2 5
 -3 0 -5 667.105 181.165 28
 3 0 5 302.528 143.075 26
 -3 0 -5 585.359 149.862 25
 3 0 5 616.807 184.349 2
 3 0 6 1674.85 308.147 5
 -3 0 -6 2009.45 321.303 28
 -3 0 -6 1416.01 262.04 25
 3 0 6 1765.1 148.114 24
 3 0 6 1747.06 150.818 23
 3 0 6 1735.8 306.53 2
 -3 0 -6 1597.13 137.997 12
 3 0 6 1778.21 150.083 20
 3 0 6 1716.64 145.942 38
 3 0 7 181.225 132.443 5
 -3 0 -7 95.743 78.9772 28
 3 0 7 -23.3806 37.2132 24
 3 0 7 -47.5505 43.3978 23
 -3 0 -7 29.1508 35.219 12
 3 0 7 75.9219 47.8359 38
 3 0 7 32.9122 33.1211 37
 3 0 7 -64.2227 52.7386 20
 3 0 8 1663.05 155.119 24
 3 0 8 1740.88 164.721 23
 -3 0 -8 1353.92 139.158 12
 3 0 8 1553.39 150.798 20
 3 0 8 1787.37 162.794 38
 3 0 8 1775.14 155.374 37
 3 0 9 2798.7 192.721 24
 3 0 9 2809.44 199.392 23
 -3 0 -9 2851.85 187.529 12
 3 0 9 2950.28 186.62 37
 3 0 9 3093.61 192.055 20
 3 0 9 3092.35 198.229 38
 3 0 10 -7.85909 47.5112 24
 3 0 10 73.3901 63.0707 23
 3 0 10 5.52349 50.4957 38
 3 0 10 12.7193 38.5051 20
 3 0 10 30.5965 31.6706 37
 -3 0 -10 18.2243 49.6717 34
 -3 0 -10 -4.34907 46.4817 12
 -3 0 -11 615.75 71.3722 12
 -3 0 -11 521.591 62.6104 34
 3 0 11 508.299 66.2983 38
 3 0 11 459.827 49.8136 37
 -3 -1 14 337.271 48.3764 24
 3 1 -14 384.059 57.4418 35
 3 1 -14 372.519 60.8891 39
 -3 -1 14 372.306 60.4228 37
 -3 -1 14 402.717 57.187 38
 -3 -1 13 1.30694 32.6298 24
 3 1 -13 -25.8965 36.5783 13
 3 1 -13 -16.965 55.4608 35
 3 1 -13 18.2265 47.4541 39
 -3 -1 13 -9.40375 52.4675 37
 -3 -1 13 -36.7895 49.3528 38
 -3 -1 12 2222.06 167.942 24
 3 1 -12 2395.19 169.283 13
 -3 -1 12 2227.2 171.798 37
 3 1 -12 2130.25 164.693 35
 3 1 -12 2226.47 172.503 39
 3 1 -12 2210.71 176.617 10
 -3 -1 12 2144.54 166.22 38
 -3 -1 11 750.598 106.462 24
 3 1 -11 810.546 112.512 39
 -3 -1 11 730.798 111.627 37
 3 1 -11 762.074 110.163 35
 -3 -1 11 843.194 117.167 38
 3 1 -11 717.578 115.766 10
 3 1 -11 868.588 106.998 36
 -3 -1 10 1907.47 341.135 26
 -3 -1 10 1531.54 145.765 24
 -3 -1 10 1672.29 292.59 1
 -3 -1 10 1431.15 142.492 38
 3 1 -10 1442.54 146.499 10
 3 1 -10 1666.04 153.043 36
 3 1 -10 1576.44 146.504 35
 3 1 -10 1468.74 290.481 6
 3 1 -10 1490.91 141.111 39
 -3 -1 9 8948.78 665.323 1
 3 1 -9 8487.52 661.037 3
 -3 -1 9 9780.08 694.305 26
 -3 -1 9 8718.01 323.251 24
 3 1 -9 8990.76 321.581 39
 -3 -1 9 8889.98 321.287 38
 3 1 -9 8825.17 324.427 36
 3 1 -9 8602.02 312.28 35
 3 1 -9 9154.93 339.417 10
 3 1 -9 9041.71 681.764 6
 -3 -1 8 2486.42 341.287 1
 -3 -1 8 2602.8 340.681 30
 -3 -1 8 3153.32 389.901 26
 3 1 -8 2715.83 349.014 3
 3 1 -8 3131.39 372.704 6
 -3 -1 7 2780.3 336.79 1
 -3 -1 7 3256.16 349.734 30
 -3 -1 7 3754.05 392.856 26
 3 1 -7 3576.52 315.253 25
 3 1 -7 3329.6 365.345 6
 3 1 -7 3138.88 364.871 3
 -3 -1 6 13801.9 671.911 30
 -3 -1 6 15166 745.229 26
 3 1 -6 13726.8 663.961 6
 3 1 -6 14723 581.979 25
 -3 -1 6 14908.6 517.213 2
 3 1 -6 14573.3 692.071 3
 -3 -1 6 12930.6 644.038 1
 -3 -1 5 21975.9 761.396 1
 3 1 -5 23444.8 725.956 31
 -3 -1 5 23064.6 801.206 30
 -3 -1 5 22054.6 837.858 26
 -3 -1 5 24163.6 528.282 2
 3 1 -5 22165.5 678.257 25
 3 1 -5 22490.6 787.92 6
 3 1 -5 23304.1 799.882 3
 -3 -1 4 6032.15 394.841 30
 -3 -1 4 5732.11 379.834 26
 -3 -1 4 6021.61 365.818 1
 3 1 -4 6297.96 387.504 3
 3 1 -4 5975.92 365.708 31
 3 1 -4 5737.55 383.121 6
 3 1 -3 88909.3 1357.42 31
 -3 -1 3 88227.9 1381.09 30
 -3 -1 3 86584.8 670.391 29
 -3 -1 3 86002.3 1234.79 1
 3 1 -3 89773.3 1377.69 6
 3 1 -3 90218.7 1154.21 5
 3 1 -2 81.5231 84.9891 5
 3 1 -2 25.071 115.379 31
 -3 -1 2 108.316 46.0395 26
 3 1 -2 -6.06288 110.833 6
 -3 -1 2 74.5107 100.949 30
 -3 -1 2 -8.4067 57.0607 1
 -3 -1 1 15944.1 539.057 30
 3 1 -1 16478.9 594.23 31
 3 1 -1 16013.3 309.935 2
 -3 -1 1 16603.5 450.191 1
 3 1 -1 17140.5 589.528 6
 3 1 -1 16950 569.021 5
 -3 -1 0 12102.9 439.307 30
 3 1 0 12033.6 378.653 2
 -3 -1 0 11940.3 351.681 1
 3 1 0 11740.1 502.967 31
 3 1 0 12092.9 526.273 6
 3 1 0 11188.9 499.734 5
 -3 -1 -1 9574.69 486.475 28
 3 1 1 9109.96 402.77 2
 3 1 1 8461.23 474.427 5
 3 1 1 8895.81 443.133 31
 -3 -1 -1 9247.63 336.802 30
 3 1 2 3309.45 288.352 2
 -3 -1 -2 3096.3 317.18 28
 3 1 2 3395.37 339.738 5
 -3 -1 -3 117.471 85.4879 28
 3 1 3 91.8893 100.035 2
 3 1 3 -19.4039 116.326 5
 -3 -1 -4 1286.94 263.716 28
 -3 -1 -4 1276.84 230.074 25
 3 1 4 1084.4 219.127 2
 3 1 4 1098.45 229.35 5
 -3 -1 -5 -88.8898 103.289 28
 -3 -1 -5 -91.9912 142.623 25
 3 1 5 11.9706 37.0791 2
 3 1 5 2.29896 94.2644 5
 3 1 6 11563.6 776.214 2
 3 1 6 11199.9 775.071 5
 -3 -1 -6 10833.2 750.853 28
 3 1 6 11955.6 371.639 14
 -3 -1 -6 10999 728 25
 3 1 6 11555.1 377.181 24
 3 1 6 11228.9 381.278 23
 3 1 6 11617.8 367.675 21
 3 1 6 11769.3 381.97 38
 3 1 6 11348.9 383.586 20
 3 1 6 11485.2 365.213 37
 3 1 7 389.939 70.0008 37
 3 1 7 277.61 71.4213 14
 3 1 7 210.655 68.3213 24
 3 1 7 262.829 81.2147 23
 -3 -1 -7 341.497 74.1085 12
 3 1 7 214.429 64.3779 21
 3 1 7 225.761 81.1984 38
 3 1 7 247.563 79.5011 20
 3 1 8 7349.51 284.445 14
 3 1 8 6509.53 285.445 24
 3 1 8 6448.41 294.201 23
 -3 -1 -8 6195.38 277.555 12
 3 1 8 6938.13 278.892 21
 3 1 8 6542.91 291.019 38
 3 1 8 6729.23 294.57 20
 3 1 8 7253.04 282.362 37
 3 1 9 29.7066 50.3834 24
 3 1 9 103.097 57.5684 23
 3 1 9 100.265 38.4238 37
 3 1 9 58.4119 50.6154 20
 -3 -1 -9 58.8552 48.6127 12
 3 1 9 98.7473 62.4464 38
 3 1 10 903.367 101.254 23
 -3 -1 -10 937.855 93.9094 12
 3 1 10 929.999 90.2049 20
 -3 -1 -10 838.738 90.7084 34
 3 1 10 955.334 96.2024 38
 -3 -1 -11 34.6293 25.1035 12
 3 1 11 58.3976 26.7864 38
 -3 -1 -11 42.3423 21.9036 34
 -3 -2 14 150.013 33.6454 24
 3 2 -14 125.349 39.8833 13
 3 2 -14 207.953 53.9338 39
 -3 -2 14 145.147 42.5708 38
 -3 -2 14 199.539 53.7115 37
 3 2 -14 202.322 50.4611 35
 -3 -2 13 74.3281 34.0224 24
 3 2 -13 -15.4481 41.2468 13
 3 2 -13 67.0279 46.9011 39
 3 2 -13 -8.34326 45.9196 35
 -3 -2 13 27.8932 55.0039 37
 -3 -2 13 31.3561 41.1812 38
 -3 -2 12 898.142 107.209 24
 3 2 -12 737.222 105.13 13
 3 2 -12 772.3 112.469 10
 3 2 -12 943.6 114.51 39
 -3 -2 12 814.124 109.305 38
 -3 -2 12 798.766 115.272 37
 3 2 -12 1053.42 120.345 35
 -3 -2 11 5093.23 249.188 24
 -3 -2 11 4252.03 232.741 38
 3 2 -11 4624.68 244.715 39
 -3 -2 11 4644.44 252.134 37
 3 2 -11 4076.28 239.606 10
 3 2 -11 4318.77 238.221 35
 -3 -2 10 4290.74 507.76 1
 -3 -2 10 4861.95 519.848 26
 -3 -2 10 4518.81 233.853 24
 -3 -2 10 4159 228.173 38
 3 2 -10 4887.02 522.958 6
 3 2 -10 4595.8 509.074 3
 3 2 -10 4259.72 229.973 39
 3 2 -10 4152.22 229.966 35
 3 2 -10 4131.09 238.007 10
 3 2 -10 4515.95 244.71 36
 -3 -2 9 5435.64 529.431 1
 -3 -2 9 4494.34 468.258 30
 -3 -2 9 5123.7 241.926 38
 -3 -2 9 4859.99 524.364 26
 3 2 -9 4997.68 237.371 39
 3 2 -9 5424.37 517.53 6
 3 2 -9 4833.89 506.85 3
 3 2 -9 4908.82 238.505 35
 3 2 -9 5053.6 249.138 36
 3 2 -9 5301.74 257.694 10
 -3 -2 8 1839.92 285.746 30
 -3 -2 8 1518.42 283.146 1
 -3 -2 8 1145.96 275.245 26
 3 2 -8 1598.54 290.736 6
 3 2 -8 1583.22 291.38 3
 -3 -2 7 1138.4 211.191 1
 -3 -2 7 1482.48 306.223 26
 3 2 -7 1424.66 256.874 6
 -3 -2 7 1152.8 222.551 30
 3 2 -7 1088.84 229.233 3
 -3 -2 6 17126.3 764.841 30
 3 2 -6 16991.5 768.697 6
 -3 -2 6 17092.5 746.966 1
 3 2 -6 16897.3 755.113 3
 -3 -2 5 25792.9 886.217 30
 -3 -2 5 24171.9 909.274 26
 3 2 -5 25925.6 848.767 3
 -3 -2 5 25943.4 844.359 1
 3 2 -5 25733.7 883.471 6
 -3 -2 4 2477.77 276.694 30
 -3 -2 4 2460.84 171.227 29
 -3 -2 4 2466.13 242.885 26
 3 2 -4 2422.71 276.414 6
 3 2 -4 2408.59 246.624 3
 -3 -2 4 2215.73 231.593 1
 -3 -2 3 110311 1158.16 29
 -3 -2 3 104606 1379.47 1
 -3 -2 3 100866 1542.61 30
 -3 -2 3 107473 1307.69 26
 3 2 -3 104467 1623.7 31
 3 2 -3 100184 1594.55 6
 3 2 -3 101898 1469.77 5
 3 2 -2 105743 1632.28 31
 -3 -2 2 103840 1484.79 30
 -3 -2 2 104689 1211.87 1
 3 2 -2 103941 882.823 2
 3 2 -2 103843 1516.87 5
 3 2 -2 102512 1592.99 6
 -3 -2 1 12938.9 500.711 30
 3 2 -1 13288.9 393.232 2
 -3 -2 1 14160.4 378.329 1
 3 2 -1 12389.9 575.473 6
 3 2 -1 13075.6 576.81 5
 -3 -2 0 13589.2 481.99 30
 -3 -2 0 12465.6 542.014 28
 3 2 0 13109.9 465.802 2
 3 2 0 13294.4 608.973 5
 3 2 1 8583.69 442.236 2
 -3 -2 -1 8526.98 491.54 28
 3 2 1 8267.17 516.051 5
 -3 -2 -2 102.765 92.1314 28
 3 2 2 -85.4253 71.7205 2
 3 2 2 32.2608 103.307 5
 3 2 3 8206.42 541.426 2
 -3 -2 -3 7071.81 521.737 28
 -3 -2 -3 7991.32 572.524 25
 3 2 3 7604.74 573.228 5
 3 2 4 6406.17 539.605 2
 -3 -2 -4 6106.4 529.487 28
 -3 -2 -4 6301.21 540.427 25
 3 2 4 6035.14 542.895 5
 -3 -2 -5 909.741 239.125 28
 3 2 5 1255.96 126.16 14
 -3 -2 -5 817.22 203.762 25
 3 2 5 1187.13 120.554 24
 3 2 5 1267.35 127.306 23
 3 2 5 1250.86 278.618 5
 3 2 5 1051.3 118.377 21
 3 2 5 950.472 232.357 2
 3 2 5 1299.22 127.335 38
 3 2 5 1294.91 130.093 20
 3 2 6 8176.6 666.137 2
 -3 -2 -6 8556.26 692.771 28
 3 2 6 9005.74 338.027 14
 -3 -2 -6 8737.41 685.586 25
 3 2 6 9306.97 337.959 24
 3 2 6 8807.37 338.414 23
 3 2 6 8900.23 334.977 21
 3 2 6 8855.35 339.313 38
 3 2 6 8796.42 344.187 20
 3 2 6 9294.72 738.245 5
 3 2 7 10922 366.344 14
 3 2 7 10372.8 355.373 24
 3 2 7 10060 362.376 23
 -3 -2 -7 10095.4 349.404 12
 3 2 7 10953.4 364.358 21
 3 2 7 9949.37 365.416 20
 3 2 7 9980.15 356.77 38
 3 2 8 1387.81 128.446 14
 3 2 8 1543.57 133.494 24
 3 2 8 1369.05 138.073 23
 -3 -2 -8 1441.45 133.2 12
 3 2 8 1399.17 126.686 21
 3 2 8 1495.43 140.133 38
 3 2 8 1280.8 134.578 20
 3 2 9 75.129 40.7428 14
 3 2 9 223.334 67.0173 23
 -3 -2 -9 76.7833 45.0123 12
 3 2 9 133.863 45.7875 21
 3 2 9 117.536 48.0603 38
 3 2 9 192.994 57.6057 20
 -3 -2 -10 99.2916 38.6749 34
 3 2 10 88.045 37.1786 38
 -3 -2 -10 33.7293 29.6254 12
 3 2 10 75.2444 32.5218 20
 3 3 -14 33.082 36.9601 35
 3 3 -14 69.3088 34.3621 13
 3 3 -14 51.1025 34.1289 39
 -3 -3 14 80.3417 28.1667 38
 -3 -3 14 38.858 37.5741 37
 3 3 -13 357.405 72.6347 13
 3 3 -13 301.431 63.0418 39
 -3 -3 13 227.748 61.5679 37
 -3 -3 13 271.209 60.1997 38
 3 3 -13 288.749 70.448 35
 3 3 -12 4546.65 240.779 13
 3 3 -12 4418.81 226.993 39
 -3 -3 12 4706.11 232.895 38
 -3 -3 12 4624.63 243.499 37
 3 3 -12 4136.35 232.548 10
 3 3 -12 4196.26 225.557 35
 -3 -3 11 982.999 115.729 38
 3 3 -11 972.23 127.037 13
 3 3 -11 980.797 123.2 10
 -3 -3 11 890.763 122.44 37
 3 3 -11 1015.91 118.977 35
 3 3 -11 971.638 111.755 39
 -3 -3 10 4947.22 519.806 1
 -3 -3 10 4109.82 503.876 26
 3 3 -10 4146.38 492.27 3
 3 3 -10 4357.89 235.542 35
 3 3 -10 4458.84 233.949 39
 -3 -3 10 4655.46 239.784 38
 3 3 -10 5114.75 530.636 6
 3 3 -10 4041.79 234.638 10
 3 3 -10 4477.75 248.296 36
 3 3 -9 -4.88193 34.9246 15
 -3 -3 9 -51.2724 61.9219 1
 -3 -3 9 -102.589 166.933 26
 -3 -3 9 -149.965 56.7824 38
 3 3 -9 27.8145 47.3288 36
 3 3 -9 -264.156 199.62 3
 3 3 -9 -224.965 180.28 6
 3 3 -9 121.954 41.4884 35
 -3 -3 9 -363.337 137.616 30
 3 3 -9 -53.8343 28.2132 39
 3 3 -9 130.004 45.4396 10
 -3 -3 8 3602.29 426.746 30
 -3 -3 8 3415.01 483.876 26
 3 3 -8 3503.75 431.584 3
 3 3 -8 3269.1 416.671 6
 -3 -3 8 3453.18 411.64 1
 -3 -3 7 1951.81 311.492 30
 -3 -3 7 1977.43 354.088 26
 3 3 -7 2169.78 316.918 6
 3 3 -7 2347.12 316.022 3
 -3 -3 6 4387.84 474.177 26
 3 3 -6 4846.92 424.123 3
 -3 -3 6 4400.77 416.136 30
 3 3 -6 4920.49 437.755 6
 -3 -3 5 5677.76 441.092 26
 3 3 -5 5741.79 439.978 6
 3 3 -5 4793.69 382.222 3
 -3 -3 5 5064.33 390.835 1
 -3 -3 4 1213.01 147.639 29
 -3 -3 4 1283.42 173.8 26
 3 3 -4 1365.56 240.213 6
 -3 -3 4 1540.36 196.636 1
 3 3 -4 1374.1 183.432 3
 -3 -3 3 5437.26 328.572 29
 -3 -3 3 5208.62 313.58 1
 -3 -3 3 5356.55 341.374 26
 3 3 -3 5047.75 410.53 6
 3 3 -3 5282.06 393.791 5
 -3 -3 2 5531.74 370.545 30
 3 3 -2 5910.33 291.056 2
 3 3 -2 5746.38 435.892 6
 3 3 -2 5094.76 396.466 5
 3 3 -1 -38.1981 101.454 5
 -3 -3 1 112 55.9419 30
 -3 -3 1 -27.0628 31.3681 28
 3 3 -1 83.7335 127.806 6
 3 3 -1 184.972 57.8251 2
 -3 -3 0 227.122 109.454 28
 3 3 0 113.483 59.1204 2
 3 3 0 141.839 91.2465 5
 3 3 1 1008.83 225.758 5
 -3 -3 -1 1128 206.378 28
 3 3 1 1207.31 187.007 2
 3 3 2 652.584 172.185 5
 -3 -3 -2 655.881 167.821 28
 -3 -3 -2 611.768 186.645 25
 3 3 2 750.212 163.423 2
 3 3 3 3681.84 398.926 2
 -3 -3 -3 3552.75 395.421 28
 -3 -3 -3 4292.08 451.016 25
 3 3 3 4603.67 459.924 5
 3 3 4 1659.75 303.569 5
 -3 -3 -4 1822.29 307.589 28
 3 3 4 1985.38 157.662 14
 -3 -3 -4 2121.98 348.642 25
 3 3 4 2092.91 156.2 23
 3 3 4 1749.13 150.582 21
 3 3 4 2222.38 329.859 2
 3 3 4 1944.48 151.409 38
 3 3 4 1962.07 161.798 20
 -3 -3 -5 5140.07 521.248 28
 3 3 5 5301.23 264.69 14
 -3 -3 -5 5586.09 546.694 25
 3 3 5 6078.81 574.462 2
 3 3 5 5788.62 269.594 23
 3 3 5 5484.81 267.655 21
 3 3 5 5372.32 256.217 38
 3 3 5 5275.13 273.541 20
 3 3 5 6081.56 597.977 5
 3 3 6 3991.98 230.032 14
 3 3 6 3983.68 228.998 23
 3 3 6 4004.6 227.024 21
 3 3 6 3686.02 229.511 20
 3 3 6 3826.1 218.857 38
 3 3 7 4576.77 236.857 14
 3 3 7 5081.37 231.076 24
 3 3 7 4428.41 232.067 23
 -3 -3 -7 4925.74 233.3 12
 3 3 7 4762.39 240.077 21
 3 3 7 4951.42 253.458 20
 3 3 7 4601.06 234.461 38
 3 3 8 39.8754 47.8082 14
 3 3 8 -36.8098 53.5307 23
 -3 -3 -8 25.1611 41.0423 12
 3 3 8 -28.8616 40.9736 21
 3 3 8 -51.1709 45.5043 38
 3 3 8 31.1491 54.4779 20
 3 3 9 222.709 43.7862 14
 3 3 9 236.277 54.8795 23
 -3 -3 -9 165.408 40.8721 12
 3 3 9 247.654 48.4636 21
 3 3 9 273.599 50.7804 38
 3 3 9 259.653 56.7382 20
 3 4 -14 -14.5811 39.1105 16
 3 4 -14 10.906 35.9873 13
 -3 -4 14 2.80695 30.0888 37
 3 4 -14 12.5819 30.1372 35
 3 4 -14 23.3662 25.4659 39
 3 4 -13 479.698 75.1122 35
 3 4 -13 460.979 83.8529 13
 -3 -4 13 471.175 75.645 37
 -3 -4 13 407.567 61.2002 38
 3 4 -13 541.935 75.1083 39
 3 4 -12 22.4585 60.5592 13
 -3 -4 12 -30.877 45.123 38
 3 4 -12 52.5733 36.3726 39
 3 4 -12 44.3267 49.9221 10
 -3 -4 12 44.1048 54.3441 37
 3 4 -12 8.27342 52.963 35
 3 4 -11 1274.97 141.281 13
 3 4 -11 1623.31 143.389 39
 -3 -4 11 1369.65 127.902 38
 -3 -4 11 1497.99 145.304 37
 3 4 -11 1644.54 145.595 35
 3 4 -11 1362.17 140.526 10
 3 4 -10 449.365 82.2836 15
 3 4 -10 396.768 82.7543 13
 3 4 -10 630.232 85.1261 39
 3 4 -10 524.028 88.982 35
 3 4 -10 486.433 85.3812 10
 -3 -4 10 456.435 82.0045 38
 -3 -4 9 3839.35 456.944 30
 3 4 -9 3383.11 213.906 15
 -3 -4 9 3429.23 494.987 26
 3 4 -9 3502.56 452.01 3
 3 4 -9 3767.36 215.946 35
 -3 -4 9 3666.22 433.694 1
 3 4 -9 3268.33 420.866 6
 3 4 -9 3527.76 211.27 10
 -3 -4 8 1318.44 281.567 30
 -3 -4 8 1469.87 270.58 1
 -3 -4 8 1276.17 335.646 26
 3 4 -8 1908.77 151.044 36
 3 4 -8 2165.86 329.571 6
 3 4 -8 1661.35 310.117 3
 -3 -4 7 66.8986 109.025 30
 -3 -4 7 546.298 157.242 1
 -3 -4 7 102.231 165.294 26
 3 4 -7 365.243 157.972 3
 3 4 -7 379.546 145.761 6
 -3 -4 6 2205.39 347.865 26
 3 4 -6 2603.43 336.813 6
 3 4 -6 2501.95 315.534 3
 -3 -4 6 2468.42 303.927 1
 -3 -4 5 3069.42 351.392 26
 -3 -4 5 3509.55 326.516 1
 3 4 -5 3588.97 336.607 3
 3 4 -5 3223.67 367.285 6
 -3 -4 4 -73.7421 47.0897 29
 -3 -4 4 -196.557 115.498 26
 -3 -4 4 86.6847 67.3439 1
 3 4 -4 -235.948 127.617 6
 -3 -4 3 106.887 71.3206 29
 -3 -4 3 23.7422 69.6139 26
 3 4 -3 180.2 131.113 6
 3 4 -3 152.665 142.494 5
 -3 -4 2 357.535 100.093 28
 -3 -4 2 303.977 83.5069 27
 3 4 -2 243.083 135.901 6
 3 4 -2 310.163 121.525 5
 -3 -4 1 4865.12 360.497 30
 -3 -4 1 5573.67 383.958 28
 3 4 -1 6381.16 400.299 2
 3 4 -1 5511.83 468.899 5
 3 4 -1 5802.71 473.281 6
 -3 -4 0 7309.1 465.324 28
 3 4 0 7516.53 468.805 2
 -3 -4 0 7189.83 523.341 25
 3 4 0 6469.88 516.559 5
 -3 -4 -1 1791.48 250.828 28
 -3 -4 -1 1680.17 281.117 25
 3 4 1 1868.23 265.16 2
 3 4 1 1335.02 279.586 5
 3 4 2 236.378 148.59 5
 -3 -4 -2 388.903 142.803 28
 -3 -4 -2 494.089 213.022 25
 3 4 3 -266.085 131.095 5
 -3 -4 -3 -203.644 121.889 25
 3 4 3 24.2293 46.671 14
 3 4 3 65.3533 43.3644 21
 3 4 3 37.2931 61.5826 11
 3 4 3 -29.4427 47.6852 20
 3 4 3 -91.5484 136.835 2
 -3 -4 -4 2248.23 347.154 28
 3 4 4 1757.51 160.299 14
 -3 -4 -4 2411.12 361.839 25
 3 4 4 2058.01 156.726 23
 3 4 4 1736.52 154.862 21
 3 4 4 1319.49 303.939 5
 3 4 4 1958.63 170.853 20
 3 4 4 2498.76 363.842 2
 3 4 4 1940.1 150.882 38
 3 4 5 3888.24 231.519 14
 3 4 5 4254.68 230.928 23
 3 4 5 3430.81 217.252 21
 3 4 5 3825.71 212.017 38
 3 4 5 3757.97 228.639 20
 3 4 6 1070.31 129.148 14
 3 4 6 1373.77 130.315 23
 -3 -4 -6 1391.82 120.979 12
 3 4 6 1208.85 130.758 21
 3 4 6 1287.05 122.25 38
 3 4 6 1206.96 138.838 20
 3 4 7 359.644 80.3924 14
 3 4 7 530.704 84.1229 23
 3 4 7 380.961 77.9045 21
 3 4 7 401.184 70.2381 38
 3 4 7 397.195 84.9192 20
 -3 -4 -7 441.473 66.6509 12
 3 4 8 13.9071 36.1281 14
 3 4 8 114.851 34.38 38
 3 4 8 120.003 44.4447 23
 3 4 8 83.2121 48.4554 20
 -3 -4 -8 64.4413 29.1105 12
 3 4 8 69.6651 38.6281 21
 3 4 9 80.0422 27.3952 20
 -3 -5 14 59.7548 25.5003 17
 3 5 -14 214.265 50.1276 16
 3 5 -14 135.865 44.0631 13
 -3 -5 14 212.431 35.301 37
 3 5 -14 112.912 34.7129 35
 3 5 -13 457.683 79.2234 16
 3 5 -13 310.227 75.2253 13
 -3 -5 13 428.394 66.3144 37
 3 5 -13 474.904 73.4567 35
 3 5 -12 778.819 105.798 16
 3 5 -12 756.651 105.633 13
 -3 -5 12 577.179 84.0844 37
 3 5 -12 628.674 93.4666 35
 3 5 -12 656.388 95.991 10
 3 5 -12 711.326 87.2677 39
 3 5 -11 2929.79 199.249 13
 -3 -5 11 3299.62 195.789 37
 3 5 -11 3252.24 205.792 10
 3 5 -11 3200.97 198.406 35
 3 5 -10 -56 54.1339 15
 -3 -5 10 -84.8519 48.6383 37
 3 5 -10 99.2231 53.5805 13
 3 5 -10 80.5015 41.8229 35
 3 5 -10 31.6671 31.1624 10
 -3 -5 9 39.7937 63.3073 30
 3 5 -9 10.8973 46.6922 15
 -3 -5 9 -394.214 148.707 1
 3 5 -9 -28.1329 46.2614 13
 3 5 -9 65.0019 44.7675 35
 3 5 -9 -271.157 147.609 3
 3 5 -9 18.1996 30.0595 10
 -3 -5 8 8127.54 664.15 30
 3 5 -8 7979.93 317.746 16
 3 5 -8 8396.58 329.222 15
 -3 -5 8 7334.68 760.201 26
 3 5 -8 7967.43 310.78 13
 3 5 -8 8232.83 659.968 6
 3 5 -8 7493.21 610.29 3
 -3 -5 8 8510.88 632.971 1
 3 5 -8 8201.06 305.243 35
 3 5 -7 5386.49 523.249 6
 3 5 -7 5746.31 266.956 15
 -3 -5 7 5050.65 602.89 26
 3 5 -7 5778.56 512.682 3
 -3 -5 7 4906.73 450.978 1
 -3 -5 6 2978.58 390.982 26
 -3 -5 6 2769.76 318.611 1
 3 5 -6 2991.69 335.795 3
 3 5 -6 3147.37 389.286 6
 -3 -5 5 377.298 138.925 26
 3 5 -5 144.13 104.94 6
 -3 -5 4 423.932 119.327 29
 -3 -5 4 206.181 128.337 26
 3 5 -4 140.475 135.221 6
 -3 -5 3 2637.17 301.239 29
 -3 -5 3 3066.74 338.476 26
 -3 -5 3 3378.22 333.565 25
 3 5 -3 2669.42 352.728 6
 3 5 -3 2844.21 369.128 5
 -3 -5 2 1552.73 259.129 25
 -3 -5 2 1710.25 246.293 30
 3 5 -2 1843.92 302.631 6
 3 5 -2 1840.6 291.591 5
 -3 -5 1 1289.63 209.269 27
 -3 -5 1 1017.36 221.069 25
 3 5 -1 1065.11 248.132 5
 -3 -5 0 4343.65 434.97 27
 -3 -5 0 4541.67 458.479 25
 3 5 0 3916.23 458.067 5
 -3 -5 -1 8425.59 662.776 27
 3 5 1 8548.35 321.076 8
 3 5 1 8751.78 327.169 14
 -3 -5 -1 7565.97 615.352 25
 3 5 1 8358.66 316.16 16
 3 5 1 8259.1 321.518 11
 3 5 1 8271.99 651.881 5
 3 5 1 8327.89 323.288 21
 3 5 1 8673.02 320.774 20
 3 5 2 -318.201 144.417 5
 3 5 2 77.3077 64.7083 16
 -3 -5 -2 -2.92784 64.1721 27
 3 5 2 75.785 36.7888 8
 -3 -5 -2 -420.911 147.087 25
 3 5 2 170.357 59.569 14
 3 5 2 41.5435 43.4985 21
 3 5 2 143.343 72.7415 11
 3 5 2 90.9227 57.2815 20
 3 5 3 48.2103 50.9204 14
 3 5 3 182.714 61.6103 21
 3 5 3 155.224 88.85 11
 3 5 4 771.576 114.613 14
 3 5 4 819.954 118.976 21
 3 5 4 841.756 116.747 20
 3 5 5 24.7276 58.1774 14
 3 5 5 -11.386 35.8181 23
 3 5 5 21.2288 61.1995 21
 3 5 5 13.2159 74.6526 20
 3 5 6 184.577 68.3469 14
 3 5 6 145.121 46.1848 23
 3 5 6 189.959 63.4676 21
 3 5 6 202.829 80.2576 20
 3 5 7 46.0203 43.5802 21
 3 5 7 28.3629 46.7139 14
 3 5 7 102.695 56.4494 20
 3 5 7 212.889 49.4171 23
 3 5 8 -52.3834 31.3071 14
 3 5 8 12.0757 21.2871 21
 3 5 8 10.8035 27.26 20
 3 6 -14 62.1392 32.5673 16
 3 6 -14 30.656 32.4569 13
 3 6 -13 155.785 59.0267 16
 3 6 -13 24.6738 50.872 13
 3 6 -13 44.081 34.4001 35
 3 6 -12 436.217 84.047 13
 3 6 -12 433.11 83.8333 16
 3 6 -12 455.425 72.4581 35
 3 6 -11 1965.78 161.637 16
 3 6 -11 2257.57 162.419 15
 3 6 -11 2051.35 163.082 13
 3 6 -11 1997.9 152.003 35
 3 6 -11 1990.58 147.206 10
 3 6 -10 99.151 62.3275 16
 3 6 -10 77.7659 57.6109 15
 3 6 -10 89.2584 54.0631 13
 3 6 -10 30.1749 39.2577 35
 3 6 -9 272.191 76.457 16
 3 6 -9 239.572 77.1941 15
 3 6 -9 139.196 53.4027 13
 3 6 -9 192.961 54.6985 35
 -3 -6 8 5056.08 533.855 30
 3 6 -8 5207.07 265.788 16
 3 6 -8 5048.19 267.007 15
 3 6 -8 5564.58 262.981 13
 3 6 -8 5509.53 262.519 22
 3 6 -8 5290.41 552.054 6
 3 6 -7 2696.15 193.599 15
 3 6 -7 2916.22 184.68 13
 3 6 -7 2116.61 350.997 6
 3 6 -7 2545.94 186.832 22
 3 6 -7 2620.93 182.309 21
 3 6 -7 3122.18 194.205 11
 3 6 -7 2436.77 179.004 16
 3 6 -6 131.48 54.376 16
 3 6 -6 151.755 48.8091 15
 3 6 -6 274.121 59.6258 11
 3 6 -6 224.67 65.2564 22
 3 6 -6 170.973 59.3449 21
 3 6 -6 142.486 139.75 6
 3 6 -5 37.5388 36.1755 16
 3 6 -5 167.579 55.0734 15
 3 6 -5 105.055 54.5926 8
 3 6 -5 143.661 56.1835 22
 3 6 -5 211.654 60.1883 21
 3 6 -5 57.2253 73.3279 6
 -3 -6 4 633.365 220.328 29
 3 6 -4 1019.97 116.555 15
 -3 -6 4 875.789 215.203 26
 3 6 -4 456.739 177.587 6
 3 6 -4 968.722 119.203 22
 3 6 -4 1083.7 118.743 21
 3 6 -3 251.754 74.654 8
 -3 -6 3 4.00356 65.3747 29
 3 6 -3 55.5748 105.855 5
 3 6 -3 217.507 65.7772 21
 3 6 -3 237.727 61.2299 22
 3 6 -3 368.056 167.087 6
 3 6 -2 5377.12 260.091 16
 -3 -6 2 5337.47 488.931 29
 3 6 -2 5764.1 271.64 8
 -3 -6 2 6123.01 508.423 25
 3 6 -2 5505.16 262.294 22
 3 6 -2 5569.27 264.932 21
 3 6 -2 5370.52 253.633 11
 3 6 -2 5279.55 532.279 5
 3 6 -1 -53.627 46.9926 16
 3 6 -1 7.2872 28.1639 14
 3 6 -1 42.2054 49.7345 8
 -3 -6 1 32.7746 77.4135 25
 3 6 -1 -11.2363 32.7171 22
 3 6 -1 53.3665 45.4232 21
 3 6 -1 84.8441 57.5637 11
 3 6 0 1207.92 136.984 16
 3 6 0 1162.76 132.277 8
 3 6 0 1113.69 124.39 14
 -3 -6 0 973.584 223.095 25
 3 6 0 1252.94 130.779 22
 3 6 0 1168.83 121.362 20
 3 6 0 1152.98 129.843 21
 3 6 0 1125.46 131.09 11
 3 6 0 1393.14 278.953 5
 3 6 1 1289.1 141.037 16
 3 6 1 1365.71 141.264 8
 -3 -6 -1 2110.93 374.262 27
 3 6 1 1400.74 138.898 14
 -3 -6 -1 1647.64 291.894 25
 3 6 1 1191.49 135.253 21
 3 6 1 1362.66 130.347 20
 3 6 1 1351.38 152.433 11
 3 6 1 1291.3 294.386 5
 3 6 2 329.456 99.391 11
 3 6 2 284.882 75.2734 8
 3 6 2 386.933 88.1553 14
 3 6 2 175.435 76.6279 21
 3 6 2 284.934 76.6949 20
 3 6 3 346.407 80.7996 14
 3 6 3 238.682 75.5329 21
 3 6 3 389.055 86.5672 20
 3 6 4 731.008 106.017 14
 3 6 4 734.502 111.038 21
 3 6 4 683.226 105.279 20
 3 6 5 363.388 82.3065 14
 3 6 5 375.568 78.7011 21
 3 6 5 427.488 81.8105 20
 3 6 6 890.387 94.9874 14
 3 6 6 891.331 92.2537 21
 3 6 6 963.749 101.273 20
 3 6 7 105.522 34.0286 14
 3 6 7 84.6934 35.0561 20
 3 6 7 124.002 35.6465 21
 3 7 -14 49.1929 23.9266 13
 3 7 -14 45.9124 22.8081 16
 3 7 -13 1134.69 94.7788 16
 3 7 -13 1057.77 92.6726 13
 3 7 -12 69.7257 49.5366 13
 3 7 -12 35.9745 33.4127 35
 3 7 -12 61.2885 54.791 16
 3 7 -11 443.149 88.3935 16
 3 7 -11 404.708 79.1788 13
 3 7 -11 538.165 81.9584 15
 3 7 -11 406.868 75.437 35
 3 7 -10 1390.37 136.616 15
 3 7 -10 1507.74 141.281 13
 3 7 -10 1222.1 134 16
 3 7 -10 1451.21 125.99 35
 3 7 -9 4048.61 234.073 16
 3 7 -9 4156.64 240.538 15
 3 7 -9 4248.69 227.381 13
 3 7 -9 4337.27 220.32 35
 3 7 -8 4315.41 242.631 16
 3 7 -8 4259.98 247.553 15
 3 7 -8 4700.92 237.938 13
 3 7 -8 4237.24 237.073 22
 3 7 -8 4478.01 231.771 11
 3 7 -7 156.599 64.5536 16
 3 7 -7 73.3319 75.6536 15
 3 7 -7 -2.56549 55.6028 22
 3 7 -7 4.56696 41.2368 21
 3 7 -7 -63.8017 39.7151 11
 3 7 -6 321.084 74.5354 16
 3 7 -6 277.996 84.8255 15
 3 7 -6 370.455 83.6114 8
 3 7 -6 257.008 78.7618 22
 3 7 -6 326.165 82.8304 21
 3 7 -6 320.759 77.4001 11
 3 7 -5 4019.87 243.321 15
 3 7 -5 3883.46 227.695 8
 -3 -7 5 4489.51 509.777 26
 3 7 -5 3845.67 234.941 22
 3 7 -5 3811.6 223.012 21
 3 7 -5 4030.2 490.937 6
 3 7 -5 3588.21 223.153 16
 3 7 -5 3910.17 227.266 11
 3 7 -4 159.185 63.1907 16
 3 7 -4 252.932 69.5662 15
 3 7 -4 135.716 58.6198 8
 3 7 -4 283.706 71.2212 11
 3 7 -4 266.903 73.1981 22
 3 7 -4 192.506 71.3969 21
 3 7 -4 404.011 174.618 6
 3 7 -3 518.351 97.0243 11
 -3 -7 3 552.761 219.244 29
 -3 -7 3 238.266 124.291 26
 3 7 -3 574.485 109.446 8
 3 7 -3 320.496 79.3005 15
 3 7 -3 476.173 92.0974 16
 3 7 -3 556.565 105.02 22
 3 7 -3 548.457 94.3334 21
 3 7 -2 1419.22 151.963 16
 3 7 -2 1501.55 142.367 15
 3 7 -2 1509.18 141.511 14
 -3 -7 2 976.958 182.67 26
 3 7 -2 1439.3 145.473 22
 3 7 -2 1519.62 144.59 21
 3 7 -2 1528.85 148.344 11
 3 7 -2 1470.16 151.467 8
 -3 -7 2 1831.55 314.35 29
 3 7 -1 429.229 93.596 16
 3 7 -1 288.892 67.5729 14
 3 7 -1 309.965 71.9028 22
 3 7 -1 203.916 80.9893 11
 3 7 -1 381.202 78.5028 21
 3 7 0 51.7148 63.6981 16
 3 7 0 10.8247 55.9322 8
 3 7 0 0.60651 32.666 14
 3 7 0 16.2197 41.7841 22
 3 7 0 20.973 55.5085 21
 3 7 0 -15.5682 71.1182 11
 3 7 0 3.74847 30.8808 20
 3 7 1 4099.22 238.154 16
 3 7 1 3960.61 228.682 8
 3 7 1 3915.52 226.064 14
 3 7 1 4045.06 237.248 21
 3 7 1 3702.87 235.54 11
 3 7 1 4510.03 236.438 20
 3 7 2 152.124 70.755 8
 3 7 2 94.5441 56.7912 14
 3 7 2 117.672 70.6089 21
 3 7 2 186.28 67.2976 20
 3 7 2 218.194 102.657 11
 3 7 3 650.033 98.7613 14
 3 7 3 841.261 114.865 21
 3 7 3 797.269 107.695 20
 3 7 4 3193.43 179.533 14
 3 7 4 3043.02 180.542 21
 3 7 4 2966.03 175.346 20
 3 7 5 219.525 58.6744 14
 3 7 5 184.456 56.5435 21
 3 7 5 260.971 62.4317 20
 3 7 6 566.24 56.1882 14
 3 7 6 513.446 51.9056 21
 3 7 6 557.049 55.6909 20
 3 8 -13 220.413 42.9949 16
 3 8 -13 196.844 37.0011 13
 3 8 -12 195.264 60.7242 16
 3 8 -12 138.359 44.3297 13
 3 8 -11 576.26 86.6602 16
 3 8 -11 522.432 72.8065 15
 3 8 -11 633.961 82.9959 13
 3 8 -10 489.682 91.443 16
 3 8 -10 568.84 93.9053 15
 3 8 -10 643.299 87.6447 13
 3 8 -9 -63.6044 75.5681 16
 3 8 -9 -38.243 70.1694 15
 3 8 -9 10.9325 30.0468 13
 3 8 -9 36.4431 35.1114 11
 3 8 -8 417.306 93.8266 16
 3 8 -8 213.995 84.9008 15
 3 8 -8 451.985 82.8486 11
 3 8 -7 1923.63 174.408 15
 3 8 -7 1948.63 171.999 22
 3 8 -7 1841.4 155.281 11
 3 8 -7 2060.14 172.449 16
 3 8 -6 48.5321 68.5847 16
 3 8 -6 -126.264 74.8053 15
 3 8 -6 27.3879 52.634 8
 3 8 -6 12.8521 49.0244 11
 3 8 -6 60.2559 71.6039 22
 3 8 -6 88.4136 64.5435 21
 3 8 -5 4499.55 249.538 16
 3 8 -5 4479.19 255.813 15
 3 8 -5 4361.1 245.974 8
 3 8 -5 4270.03 251.007 22
 3 8 -5 4378.55 239.516 21
 3 8 -5 4510.27 246.848 11
 3 8 -4 288.153 77.5186 15
 3 8 -4 313.177 88.4996 8
 3 8 -4 321.981 86.7168 16
 3 8 -4 194.086 71.1339 22
 3 8 -4 326.501 81.9776 21
 3 8 -4 403.095 86.4736 11
 3 8 -3 420.023 101.045 16
 3 8 -3 453.638 95.6297 15
 3 8 -3 811.205 122.487 8
 3 8 -3 458.795 94.7487 22
 3 8 -3 539.52 99.5565 21
 3 8 -3 425.14 92.5557 11
 3 8 -2 713.914 117.924 16
 3 8 -2 813.909 119.936 8
 3 8 -2 830.105 119.225 22
 3 8 -2 936.552 115.628 15
 3 8 -2 865.16 117.576 21
 3 8 -2 782.292 120.754 11
 3 8 -1 1519.52 154.213 16
 3 8 -1 1440.45 150.715 8
 3 8 -1 1496.29 134.831 14
 3 8 -1 1534.96 147.143 22
 3 8 -1 1610.21 152.796 21
 3 8 -1 1468.37 157.429 11
 3 8 0 1016.85 131.442 16
 3 8 0 840.188 104.494 14
 3 8 0 790.077 118.368 8
 3 8 0 1035.57 114.759 22
 3 8 0 804.586 116.85 21
 3 8 0 1021.57 108.585 20
 3 8 0 839.517 132.164 11
 3 8 1 138.594 86.9446 11
 3 8 1 33.6076 65.629 8
 3 8 1 5.08339 38.5247 14
 3 8 1 83.044 65.7676 21
 3 8 1 116.716 54.1269 20
 3 8 2 1485.31 121.327 8
 3 8 2 1437.98 123.835 14
 3 8 2 1444.49 135.362 21
 3 8 2 1521.19 126.216 20
 3 8 3 422.067 70.0158 14
 3 8 3 395.157 75.6526 21
 3 8 3 380.501 65.9937 20
 3 8 4 193.457 44.9836 14
 3 8 4 274.852 49.9094 20
 3 8 4 226.353 52.7299 21
 3 9 -12 0.12369 31.6823 16
 3 9 -11 79.5889 49.1313 16
 3 9 -11 79.7181 37.7361 15
 3 9 -11 -33.4049 23.7653 13
 3 9 -10 4.53672 50.4498 16
 3 9 -10 26.3361 46.8625 15
 3 9 -9 81.0479 67.5072 16
 3 9 -9 29.0515 58.009 15
 3 9 -9 111.813 49.5679 11
 3 9 -8 230.816 76.6549 16
 3 9 -8 132.288 79.1579 15
 3 9 -8 121.871 58.5298 11
 3 9 -7 -43.4212 60.5953 16
 3 9 -7 -123.251 82.3741 15
 3 9 -7 14.5773 49.6798 8
 3 9 -7 -71.7203 47.9436 11
 3 9 -6 2056.28 169.371 16
 3 9 -6 2161.15 176.896 15
 3 9 -6 2132.82 161.636 8
 3 9 -6 2364.56 186.43 22
 3 9 -6 2321.74 165.56 21
 3 9 -6 2223.15 164.079 11
 3 9 -5 397.308 90.8192 16
 3 9 -5 312.944 91.4372 15
 3 9 -5 309.695 90.8413 8
 3 9 -5 521.198 104.164 22
 3 9 -5 375.832 80.5401 21
 3 9 -5 399.448 91.0306 11
 3 9 -4 465.173 99.3059 16
 3 9 -4 386.546 92.034 15
 3 9 -4 339.635 97.2523 8
 3 9 -4 487.573 98.2908 22
 3 9 -4 457.098 85.5091 21
 3 9 -4 509.644 98.3916 11
 3 9 -3 449.56 101.408 16
 3 9 -3 462.856 87.5683 15
 3 9 -3 357.374 92.5857 11
 3 9 -3 294.284 96.3237 8
 3 9 -3 285.682 84.3914 22
 3 9 -3 330.105 80.0023 21
 3 9 -2 42.533 71.9892 16
 3 9 -2 -104.301 91.4088 8
 3 9 -2 65.0085 58.8189 22
 3 9 -2 -7.43434 54.2806 21
 3 9 -2 20.5958 70.7069 11
 3 9 -1 157.298 79.7678 16
 3 9 -1 36.0784 72.2534 8
 3 9 -1 161.805 67.7217 21
 3 9 -1 142.489 83.8506 11
 3 9 0 74.9319 67.5969 8
 3 9 0 74.6375 38.983 14
 3 9 0 77.273 53.6359 21
 3 9 0 194.833 84.8139 11
 3 9 1 101.023 51.5642 8
 3 9 1 110.052 42.3347 14
 3 9 1 106.973 56.0359 21
 3 9 1 164.073 45.4802 20
 3 9 2 93.8722 31.3787 8
 3 9 2 149.264 38.5844 14
 3 9 2 54.0056 40.3001 21
 3 9 2 180.48 34.2478 20
 3 9 3 1378.79 82.3237 21
 3 10 -11 1067.46 71.8113 16
 3 10 -10 1017.58 86.6357 16
 3 10 -10 826.597 76.263 15
 3 10 -9 185.311 60.0858 15
 3 10 -9 213.309 60.5972 16
 3 10 -9 181.106 42.41 11
 3 10 -8 127.172 55.4152 16
 3 10 -8 142.004 62.3598 15
 3 10 -8 35.3379 38.1221 11
 3 10 -7 147.064 66.5447 15
 3 10 -7 145.322 65.6455 16
 3 10 -7 173.625 57.8321 11
 3 10 -6 25.1755 57.2357 15
 3 10 -6 47.26 49.0099 8
 3 10 -6 -12.2195 53.2278 11
 3 10 -6 -40.3085 69.3153 16
 3 10 -5 568.103 93.9329 16
 3 10 -5 528.027 88.4808 15
 3 10 -5 499.385 83.9158 8
 3 10 -5 524.483 75.1851 21
 3 10 -5 501.289 86.2535 11
 3 10 -4 84.5841 68.0633 16
 3 10 -4 111.115 68.299 8
 3 10 -4 113.258 52.4576 21
 3 10 -4 59.4415 60.8922 11
 3 10 -3 182.007 71.1269 16
 3 10 -3 131.015 75.209 8
 3 10 -3 134.03 56.3091 21
 3 10 -3 208.837 72.9424 11
 3 10 -2 1439.38 125.995 8
 3 10 -2 1339.27 108.42 21
 3 10 -2 1579.3 126.014 16
 3 10 -2 1432.44 123.267 11
 3 10 -1 1160.43 102.551 8
 3 10 -1 1329.28 102.881 21
 3 10 -1 1259.03 111.063 11
 3 10 0 22.2297 38.5798 8
 3 10 0 -0.53756 32.1328 21
 3 10 1 533.915 49.8665 21
 3 11 -9 150.688 32.4107 16
 3 11 -8 206.711 44.9925 16
 3 11 -7 1168.56 74.4297 11
 3 11 -7 1362.6 94.159 16
 3 11 -6 678.3 74.3671 16
 3 11 -6 634.699 56.2617 8
 3 11 -6 654.208 65.5941 11
 3 11 -5 17.5291 39.3912 16
 3 11 -5 8.02335 36.4846 8
 3 11 -5 1.81948 34.4561 11
 3 11 -4 788.06 74.3979 16
 3 11 -4 751.123 73.9403 8
 3 11 -4 603.679 65.8847 11
 3 11 -3 596.065 65.3041 8
 3 11 -3 613.873 63.6054 11
 3 11 -2 79.2545 34.1468 8
 -4 13 1 51.202 28.5373 8
 -4 13 1 53.3674 24.7714 20
 -4 13 0 39.9979 33.5509 8
 -4 13 0 69.9258 29.7816 20
 -4 13 -1 125.005 41.6648 8
 -4 13 -1 141.257 37.6875 20
 4 -13 1 46.0312 25.2104 36
 -4 13 -2 52.4589 41.434 9
 -4 13 -2 36.8773 35.4849 8
 4 -13 2 0.13769 24.8109 36
 -4 13 -2 135.703 33.919 20
 -4 13 -3 221.405 54.8086 9
 -4 13 -3 172.616 39.0487 8
 4 -13 3 156.57 42.9256 36
 -4 13 -4 -0.47205 35.3235 9
 4 -13 4 -15.2284 34.6151 36
 -4 13 -5 -58.8571 40.7443 9
 4 -13 5 16.4852 35.4815 36
 -4 13 -6 115.002 38.8948 9
 4 -13 6 149.62 41.3033 36
 -4 13 -7 1022.12 66.7138 9
 4 -13 7 1118.81 67.6149 36
 -4 12 4 73.2028 23.958 20
 -4 12 3 613.457 60.8324 8
 -4 12 3 573.443 50.8439 18
 -4 12 3 689.154 69.9063 20
 -4 12 2 114.479 46.7374 8
 4 -12 -2 -6.79987 16.6419 39
 -4 12 2 83.9889 33.6531 18
 -4 12 2 120.185 52.6584 20
 -4 12 1 1226.3 94.533 18
 4 -12 -1 999.196 83.9346 39
 -4 12 1 1115.69 103.409 20
 4 -12 -1 1004.8 77.8216 36
 -4 12 0 921.674 103.204 9
 -4 12 0 942.992 109.827 8
 4 -12 0 803.139 84.9935 36
 -4 12 0 919.253 87.2312 18
 -4 12 -1 577.804 91.4278 9
 -4 12 -1 549.935 89.2272 8
 4 -12 1 511.158 78.5631 36
 -4 12 -2 109.09 62.9573 9
 -4 12 -2 141.341 58.546 8
 4 -12 2 78.2295 49.6708 36
 -4 12 -3 255.748 74.1429 9
 -4 12 -3 148.465 49.94 8
 -4 12 -3 197.932 69.8565 34
 -4 12 -4 496.612 90.5327 9
 -4 12 -4 477.132 68.0816 11
 -4 12 -4 453.106 65.5365 8
 -4 12 -4 494.846 85.7302 34
 4 -12 4 420.999 64.0769 32
 4 -12 5 637.052 77.4925 32
 -4 12 -5 669.806 86.1176 34
 -4 12 -5 709.467 100.442 9
 -4 12 -5 602.448 75.5426 11
 -4 12 -6 3.02832 38.0621 11
 4 -12 6 45.7143 39.3641 32
 -4 12 -6 33.4468 46.4531 9
 -4 12 -6 17.3493 39.9053 34
 -4 12 -7 1062.65 97.1717 9
 -4 12 -7 1026.3 85.2455 11
 4 -12 7 1048.29 89.7439 32
 -4 12 -7 1053.33 82.2987 34
 -4 12 -8 334.831 47.1286 11
 -4 12 -8 380.953 57.1158 9
 4 -12 8 327.853 52.1666 32
 -4 12 -9 68.1447 23.0687 9
 4 -12 9 29.2096 19.2165 32
 -4 11 5 168.963 32.1359 23
 -4 11 5 242.599 47.6372 20
 -4 11 5 246.869 43.3148 18
 -4 11 5 202.607 36.5658 33
 -4 11 4 600.929 72.4157 8
 4 -11 -4 552.782 62.6961 39
 -4 11 4 654.288 81.4954 20
 -4 11 4 619.948 76.1401 18
 -4 11 4 678.278 69.3403 33
 -4 11 3 284.261 66.7295 8
 4 -11 -3 346.678 60.7372 39
 -4 11 3 346.553 69.6625 18
 -4 11 3 281.946 75.5224 20
 -4 11 3 350.33 56.8983 33
 -4 11 2 158.073 64.7944 8
 4 -11 -2 165.918 46.8704 36
 -4 11 2 134.128 50.6359 18
 -4 11 1 -70.1023 61.9298 9
 -4 11 1 -9.84146 66.9369 8
 4 -11 -1 8.96004 39.2466 36
 -4 11 0 30.8291 58.3742 9
 -4 11 0 -2.00687 59.7378 8
 4 -11 0 50.3181 56.8714 36
 -4 11 -1 66.5712 68.7983 9
 -4 11 -1 55.4943 49.3518 8
 -4 11 -1 63.2114 60.9261 34
 -4 11 -2 54.7846 67.9668 9
 -4 11 -2 26.7288 50.0162 8
 -4 11 -2 -15.1082 55.6213 34
 -4 11 -3 324.181 89.9942 9
 -4 11 -3 446.458 81.2605 8
 -4 11 -3 402.637 85.6352 34
 -4 11 -3 345.796 69.8715 11
 4 -11 3 334.766 70.4991 32
 -4 11 -4 149.954 77.2394 9
 -4 11 -4 99.9489 53.283 11
 -4 11 -4 93.7489 40.9764 8
 -4 11 -4 125.63 64.8737 34
 4 -11 4 82.4418 61.435 32
 -4 11 -5 1968.03 164.609 9
 -4 11 -5 1761.46 139.092 12
 -4 11 -5 1700.25 142.656 11
 -4 11 -5 1777.96 148.737 34
 4 -11 5 1723.71 149.609 32
 -4 11 -6 206.139 75.7221 9
 -4 11 -6 331.047 65.2919 12
 -4 11 -6 280.978 70.5215 34
 4 -11 6 297.582 74.8717 32
 -4 11 -6 312.047 64.3512 11
 4 -11 6 331.699 64.889 17
 -4 11 -7 290.676 71.1261 9
 -4 11 -7 164.71 48.3877 12
 -4 11 -7 208.496 58.4718 11
 -4 11 -7 328.349 63.9111 34
 4 -11 7 160.108 64.3117 32
 4 -11 7 247.399 59.4217 17
 -4 11 -8 10.5153 44.4324 9
 -4 11 -8 -1.642 24.0922 12
 -4 11 -8 -4.09425 29.3115 34
 -4 11 -8 5.65475 37.883 11
 4 -11 8 -78.7483 50.3228 32
 4 -11 8 46.3318 34.3265 17
 -4 11 -9 1250.77 95.1222 9
 -4 11 -9 1204 90.265 11
 -4 11 -9 919.006 63.0037 34
 4 -11 9 1125.55 77.5891 17
 4 -11 9 1278.85 98.2897 32
 -4 11 -10 366.702 42.5686 9
 4 -11 10 357.4 43.5661 32
 -4 11 -10 364.535 41.8894 11
 -4 10 7 62.4943 24.8666 23
 4 -10 -7 72.4316 32.7898 35
 -4 10 7 124.265 34.725 18
 -4 10 6 419.825 60.3222 23
 -4 10 6 404.443 64.7834 18
 -4 10 6 328.207 56.2791 20
 4 -10 -6 350.602 48.6662 39
 -4 10 6 381.458 60.5322 33
 4 -10 -6 448.349 79.0737 35
 4 -10 -5 -2.70416 22.9949 39
 -4 10 5 39.2223 37.7876 8
 -4 10 5 -24.0804 46.8487 20
 -4 10 5 -34.2339 50.1564 18
 -4 10 5 58.527 46.3321 33
 -4 10 4 412.637 75.2572 8
 -4 10 4 423.365 83.5617 18
 -4 10 4 461.384 74.6423 19
 4 -10 -4 352.085 65.9591 39
 -4 10 4 268.96 79.1433 20
 -4 10 4 442.849 77.3324 33
 4 -10 -3 1393.95 125.159 36
 -4 10 3 1174.02 129.71 8
 -4 10 3 1257.51 130.574 18
 -4 10 3 1313.62 125.228 33
 -4 10 3 1475.74 122.933 19
 -4 10 2 141.257 68.1877 9
 -4 10 2 -28.8991 63.347 8
 4 -10 -2 39.7665 47.0571 36
 -4 10 2 26.3382 35.2438 33
 -4 10 1 443.881 93.4185 9
 -4 10 1 348.067 85.0962 8
 4 -10 -1 311.086 82.8529 36
 -4 10 1 430.424 91.9374 34
 -4 10 0 8651.21 343.983 9
 -4 10 0 9255.83 349.013 34
 -4 10 -1 2096.14 175.938 9
 -4 10 -1 2023.6 172.105 34
 -4 10 -2 13542.1 430.814 9
 4 -10 2 14092 415.179 32
 -4 10 -2 12974.6 409.489 34
 -4 10 -3 512.785 99.2594 9
 -4 10 -3 665.27 97.6258 8
 -4 10 -3 688.947 101.424 11
 -4 10 -3 487.159 88.8483 12
 -4 10 -3 556.513 98.427 34
 4 -10 3 492.685 90.4707 32
 4 -10 3 544.927 89.4952 17
 -4 10 -4 6558.39 299.946 9
 -4 10 -4 7113.8 298.543 12
 4 -10 4 6463.09 293.597 32
 -4 10 -4 7690.35 304.284 11
 -4 10 -4 6997.87 304.248 34
 4 -10 4 7468.37 297.107 17
 -4 10 -5 249.709 83.1524 9
 -4 10 -5 227.742 71.3835 11
 -4 10 -5 311.64 70.988 12
 -4 10 -5 188.869 68.0872 34
 4 -10 5 226.495 77.5771 32
 4 -10 5 294.343 69.7337 17
 -4 10 -6 1981.72 162.153 34
 -4 10 -6 1988.6 166.1 9
 -4 10 -6 2057.68 160.642 11
 -4 10 -6 2001.84 155.578 12
 4 -10 6 1954.28 156.59 17
 4 -10 6 2008.09 166.82 32
 4 -10 7 0.26377 40.8255 17
 -4 10 -7 25.2484 56.9543 9
 -4 10 -7 -36.6009 39.3551 12
 -4 10 -7 -4.92969 55.243 11
 -4 10 -7 17.3186 45.1012 34
 4 -10 7 -35.6958 75.0561 32
 4 -10 8 -16.5631 44.507 17
 -4 10 -8 0.72281 49.369 9
 -4 10 -8 34.0594 38.495 12
 -4 10 -8 37.9787 49.3303 11
 -4 10 -8 29.1602 38.1239 34
 4 -10 8 1.00971 59.2568 32
 4 -10 9 11.094 36.5687 17
 -4 10 -9 103.969 47.3604 9
 -4 10 -9 111.534 38.7565 12
 -4 10 -9 166.447 61.8663 11
 -4 10 -9 74.5978 34.5641 34
 4 -10 9 -2.07192 46.7958 32
 -4 10 -10 1431.15 96.7237 9
 -4 10 -10 1296.4 94.968 11
 -4 10 -10 1059.53 70.6573 12
 4 -10 10 1341.46 94.8677 32
 4 -10 10 1371.92 92.7075 17
 -4 9 8 14.8516 29.5335 23
 4 -9 -8 14.4194 13.826 39
 4 -9 -8 65.2558 39.3576 35
 -4 9 8 90.341 40.6315 18
 -4 9 8 13.8146 33.9194 33
 -4 9 7 516.219 78.744 23
 4 -9 -7 468.904 62.8842 39
 -4 9 7 493.293 83.1024 18
 -4 9 7 496.066 69.242 20
 4 -9 -7 594.455 90.6097 35
 -4 9 7 539.045 77.5831 33
 -4 9 7 404.704 53.8193 14
 -4 9 6 335.889 71.0895 19
 -4 9 6 234.357 64.1618 20
 -4 9 6 270.942 76.7416 18
 -4 9 6 285.053 72.0332 33
 4 -9 -6 231.183 55.5064 39
 -4 9 5 4.38368 50.1897 18
 -4 9 5 -94.8656 48.5075 8
 -4 9 5 -51.0634 59.3854 20
 4 -9 -5 -16.3689 54.8903 39
 -4 9 5 -1.34046 35.2851 19
 -4 9 5 32.0296 50.4946 33
 -4 9 4 3108.76 199.529 8
 -4 9 4 2809.03 199.494 18
 4 -9 -4 3420.98 196.1 36
 -4 9 4 2814.53 186.886 19
 -4 9 4 2880.37 192.073 33
 -4 9 3 -37.7778 68.2906 9
 4 -9 -3 76.0712 55.781 36
 -4 9 3 26.4168 40.7178 19
 -4 9 3 -2.38008 36.5623 33
 -4 9 2 710.77 112.121 9
 -4 9 2 866.061 107.296 19
 4 -9 -2 719.621 113.964 36
 -4 9 2 693.865 107.391 34
 -4 9 2 810.476 110.364 33
 -4 9 1 7707.19 325.306 9
 4 -9 -1 7551.38 322.288 36
 -4 9 1 8053.93 665.759 2
 -4 9 1 8471.66 315.845 19
 -4 9 1 7846.86 323.335 34
 -4 9 1 8365.34 315.336 33
 4 -9 0 7516.69 660.139 29
 -4 9 0 6529.49 615.66 4
 4 -9 0 6309.85 604.811 27
 -4 9 0 6237.7 292.738 9
 -4 9 0 6447.74 292.889 34
 4 -9 1 665.749 218.082 29
 -4 9 -1 579.097 98.3678 9
 4 -9 1 634.987 214.059 27
 -4 9 -1 337.782 185.632 4
 -4 9 -1 628.708 99.6859 12
 -4 9 -1 679.984 105.174 34
 4 -9 1 674.946 93.5314 17
 4 -9 1 674.656 104.263 32
 -4 9 -2 18633.9 496.57 9
 4 -9 2 18339.2 1098.1 29
 -4 9 -2 18450.2 1014.67 4
 4 -9 2 19457.8 1029.93 27
 -4 9 -2 17882.6 473.243 12
 4 -9 2 18694.2 491.005 32
 4 -9 2 17494.6 456.29 17
 -4 9 -2 17745.4 480.285 34
 4 -9 3 510.57 255.05 29
 -4 9 -3 199.791 69.2675 9
 4 -9 3 534.366 210.503 27
 -4 9 -3 366.684 166.012 4
 -4 9 -3 299.614 77.0643 34
 -4 9 -3 140.132 54.2882 12
 -4 9 -3 -25.8735 71.8919 3
 -4 9 -3 266.962 66.9316 11
 4 -9 3 200.458 69.7744 32
 4 -9 3 333.872 68.8254 17
 -4 9 -4 4437.94 247.656 9
 4 -9 4 4315.27 505.914 27
 -4 9 -4 4362.93 235.855 12
 -4 9 -4 4410 243.855 34
 -4 9 -4 4027.54 475.227 3
 4 -9 4 4583.79 241.891 17
 -4 9 -4 4895.95 246.778 11
 -4 9 -5 10688.6 380.894 9
 -4 9 -5 11055.4 380.008 34
 -4 9 -5 11099.2 379.549 12
 4 -9 5 11593.9 385.846 17
 -4 9 -6 2759.61 196.773 9
 -4 9 -6 2973.28 197.812 12
 -4 9 -6 2913.62 197.431 34
 4 -9 6 2805.73 194.995 17
 -4 9 -7 606.647 99.8605 9
 -4 9 -7 623.584 97.2525 34
 -4 9 -7 692.999 105.574 12
 4 -9 7 547.531 96.0797 17
 -4 9 -8 10016.3 338.425 9
 -4 9 -8 10093.7 332.743 12
 -4 9 -8 9804.88 325.009 34
 4 -9 8 9566.23 332.537 17
 4 -9 8 9460.1 339.044 32
 -4 9 -9 57.2207 48.1117 9
 -4 9 -9 25.7644 34.3774 34
 -4 9 -9 45.2175 43.2976 12
 4 -9 9 7.16705 51.2388 17
 4 -9 9 26.4736 54.2979 32
 4 -9 10 127.021 48.818 17
 -4 9 -10 242.409 51.4487 9
 4 -9 10 184.817 51.4453 32
 -4 9 -10 156.695 40.9765 12
 -4 9 -10 190.769 42.2213 34
 4 -9 11 353.944 52.4721 17
 -4 9 -11 414.459 48.1452 9
 -4 9 -11 297.913 37.4051 12
 -4 9 -11 451.386 57.5943 11
 -4 8 9 1173.76 80.3577 14
 4 -8 -9 1362.29 86.3838 39
 -4 8 9 1371.12 99.9142 23
 4 -8 -9 1204.55 93.9386 35
 -4 8 9 1183.41 92.7549 18
 -4 8 9 1379.96 96.6796 33
 -4 8 8 52.8152 49.9735 23
 4 -8 -8 -3.55664 35.2047 39
 -4 8 8 -88.8579 52.217 33
 -4 8 8 41.9555 31.5997 20
 4 -8 -8 18.3663 59.1855 35
 -4 8 8 17.2361 42.6253 18
 -4 8 7 589.491 102.014 33
 -4 8 7 486.175 79.1052 20
 -4 8 7 481.102 88.7545 19
 4 -8 -7 393.214 75.4253 39
 -4 8 7 489.152 93.0477 18
 -4 8 6 209.233 59.634 19
 -4 8 6 199.584 70.4372 18
 -4 8 6 185.077 74.9692 33
 4 -8 -6 173.819 67.8145 39
 -4 8 6 245.471 70.2586 20
 4 -8 -5 8965.76 342.136 39
 -4 8 5 9559.54 353.368 19
 -4 8 5 9473.37 352.045 33
 4 -8 -5 9952.19 337.718 36
 -4 8 5 9212.57 355.874 18
 -4 8 4 85.5031 49.2853 19
 4 -8 -4 -4.52718 54.2729 36
 -4 8 4 45.0694 44.0122 33
 -4 8 3 12019.4 401.253 9
 4 -8 -3 12957.8 838.285 27
 4 -8 -3 12393.8 828.606 25
 -4 8 3 12472.1 814.265 2
 -4 8 3 12538.1 400.86 19
 4 -8 -3 12847.1 412.976 36
 -4 8 3 12560.8 399.528 33
 4 -8 -2 5485.66 535.977 27
 4 -8 -2 6414.88 564.373 25
 -4 8 2 5396.6 535.246 2
 -4 8 2 5679.19 272.464 9
 4 -8 -2 5888.6 280.484 36
 -4 8 2 5843 267.547 33
 -4 8 2 5921.4 274.062 34
 -4 8 2 5884.3 270.159 19
 -4 8 2 6399.25 588.77 4
 -4 8 1 12716.6 398.455 9
 -4 8 1 12156.2 376.201 33
 4 -8 -1 13029.2 791.604 29
 4 -8 -1 12515.8 797.055 27
 -4 8 1 11885.9 763.725 2
 4 -8 -1 11501.8 360.155 17
 -4 8 1 13297.5 821.831 4
 -4 8 1 12261.9 387.659 34
 -4 8 1 12060.1 376.295 19
 -4 8 0 31.235 50.6029 34
 -4 8 0 -5.8993 35.4109 9
 4 -8 0 -90.4154 113.066 27
 4 -8 0 115.59 76.3114 26
 -4 8 0 25.4415 101.977 4
 -4 8 0 27.9693 20.76 12
 -4 8 -1 2190.51 166.666 9
 4 -8 1 1541.62 291.647 29
 4 -8 1 1829.43 323.819 27
 4 -8 1 2064.06 163.308 32
 4 -8 1 2762.18 339.148 26
 -4 8 -1 2292.84 350.37 4
 -4 8 -1 2329.6 168.399 12
 -4 8 -1 2159.05 162.3 34
 -4 8 -2 1011.56 117.43 9
 4 -8 2 715.894 229.811 29
 4 -8 2 1050.03 230.095 27
 4 -8 2 1435.21 265.759 26
 -4 8 -2 1179.82 271.27 4
 -4 8 -2 999.226 113.234 12
 -4 8 -2 602.143 186.316 3
 -4 8 -2 901.064 112.819 34
 4 -8 2 990.691 110.59 17
 4 -8 2 1126.4 125.828 32
 4 -8 3 -163.308 172.493 29
 -4 8 -3 136.822 50.9809 9
 4 -8 3 202.528 102.878 27
 4 -8 3 51.9336 164.999 26
 4 -8 3 151.327 49.3903 17
 -4 8 -3 15.4187 31.5986 12
 -4 8 -3 174.196 121.138 3
 -4 8 -3 137.428 53.6189 34
 4 -8 4 871.694 109.033 17
 -4 8 -4 1016.02 119.843 9
 4 -8 4 744.854 284.138 29
 4 -8 4 1149.2 263.347 27
 -4 8 -4 1233.22 295.844 4
 -4 8 -4 1059.05 118.831 12
 -4 8 -4 1100.31 122.448 34
 -4 8 -4 930.615 249.375 3
 4 -8 5 2251.73 431.554 29
 4 -8 5 2395.85 345.79 27
 -4 8 -5 2188.73 176.255 13
 -4 8 -5 2619.27 381.899 4
 -4 8 -5 2267.95 172.987 12
 4 -8 5 2510.43 183.721 17
 -4 8 -5 1765.08 337.765 3
 -4 8 -5 2265.69 176.625 34
 4 -8 6 102.145 58.4171 17
 -4 8 -6 149.638 67.0522 13
 -4 8 -6 28.8402 50.402 12
 -4 8 -6 207.794 66.4602 34
 -4 8 -7 -4.88751 52.8669 13
 -4 8 -7 18.596 49.6788 12
 4 -8 7 -75.4211 57.7066 17
 -4 8 -7 43.7653 47.0062 34
 -4 8 -8 5238.48 255.19 13
 -4 8 -8 5115.4 251.091 12
 -4 8 -8 5298.5 254.931 34
 4 -8 8 5040.42 257.921 17
 4 -8 9 345.686 85.3629 17
 -4 8 -9 412.096 77.4968 34
 4 -8 9 228.87 68.4751 32
 4 -8 10 -0.45489 50.33 17
 -4 8 -10 -0.20457 38.5066 12
 -4 8 -10 6.31468 33.9318 34
 4 -8 10 -21.4595 27.8058 32
 -4 8 -11 657.045 63.9935 9
 -4 8 -11 688.663 69.0017 12
 4 -8 11 743.349 80.0365 17
 -4 7 10 143.493 45.9445 23
 -4 7 10 54.0461 27.4981 21
 4 -7 -10 112.989 33.5676 39
 4 -7 -10 83.2209 42.2542 35
 -4 7 10 82.4678 39.4667 18
 -4 7 10 142.321 38.726 33
 -4 7 9 1288.18 121.436 23
 -4 7 9 1482.34 110.376 21
 4 -7 -9 1334.91 111.98 39
 -4 7 9 1284.35 119.845 18
 4 -7 -9 1289.45 122.038 35
 -4 7 9 1318.37 114.674 33
 4 -7 -8 38.2296 56.2533 39
 -4 7 8 28.6858 55.2874 18
 4 -7 -8 -15.2959 71.425 35
 -4 7 8 58.6797 61.5498 33
 -4 7 7 614.353 90.0304 20
 -4 7 7 593.818 96.8488 19
 -4 7 7 630.936 105.455 18
 4 -7 -7 588.24 107.001 39
 -4 7 7 643.152 102.979 33
 -4 7 6 866.691 118.808 18
 -4 7 6 1124.17 131.921 19
 -4 7 6 1013.8 130.393 33
 4 -7 -6 1015.23 123.849 39
 4 -7 -6 1111.75 119.229 17
 4 -7 -5 12789.7 821.01 27
 -4 7 5 11974.6 802.109 2
 4 -7 -5 13132.7 874.516 25
 4 -7 -5 12862.5 391.014 17
 4 -7 -5 13143.1 402.022 36
 -4 7 5 11955.5 402.211 19
 -4 7 5 12756 411.21 33
 -4 7 4 15656.2 449.757 9
 4 -7 -4 17031.4 940.981 27
 -4 7 4 17394 930.082 2
 4 -7 -4 16845.9 952.929 25
 4 -7 -4 16648.8 455.07 36
 -4 7 4 16379.2 456.421 33
 -4 7 4 16885.1 465.267 19
 4 -7 -4 16728 441.263 17
 -4 7 3 83.5241 51.0874 9
 4 -7 -3 -54.5823 75.183 27
 4 -7 -3 121.241 114.239 25
 4 -7 -3 125.967 51.1897 36
 -4 7 3 45.8308 39.3804 19
 -4 7 3 -147.75 116.943 30
 -4 7 3 18.5545 51.3083 34
 -4 7 3 -125.219 95.5828 2
 -4 7 3 84.9826 41.6131 33
 -4 7 2 -64.4201 110.517 30
 4 -7 -2 -87.4471 95.1222 29
 4 -7 -2 -176.919 90.7911 27
 -4 7 2 225.548 97.2375 1
 4 -7 -2 -25.1664 87.9259 25
 -4 7 2 195.479 114.916 2
 -4 7 1 7709.49 543.386 1
 -4 7 1 7135.46 576.729 30
 4 -7 -1 7463.25 545.985 29
 -4 7 1 7107.13 581.703 4
 4 -7 -1 6496 547.199 27
 4 -7 -1 6926.03 521.984 25
 -4 7 1 6868.87 536.522 2
 -4 7 0 21309.8 980.359 30
 4 -7 0 23438.9 980.069 29
 -4 7 0 21163.3 992.751 4
 4 -7 0 20251.5 937.115 27
 4 -7 0 23454 904.314 26
 4 -7 0 24170 902.191 25
 -4 7 0 22397.3 934.869 1
 4 -7 1 8294.61 620.846 29
 -4 7 -1 8660.02 636.709 4
 4 -7 1 9079.01 630.063 27
 4 -7 1 9766.45 587.443 26
 -4 7 -1 10018.9 676.553 30
 4 -7 2 27726.4 1199.08 29
 -4 7 -2 28056.9 1154.32 4
 4 -7 2 29324.9 1129.36 27
 4 -7 2 31787.8 1105.47 26
 4 -7 3 2797.48 428.095 29
 4 -7 3 2943.59 366.691 27
 4 -7 3 2948.61 380.872 26
 -4 7 -3 2492.09 354.1 4
 -4 7 -3 2493.18 360.039 3
 4 -7 4 -146.248 187.257 29
 4 -7 4 303.887 123.675 27
 4 -7 4 291.804 165.973 26
 -4 7 -4 20.4794 93.5439 4
 -4 7 -4 136.289 47.2783 34
 -4 7 -4 190.872 136.926 3
 -4 7 -5 8583.66 670.779 4
 4 -7 5 9251.93 670.079 27
 -4 7 -5 9844.24 349.602 13
 -4 7 -5 9893.32 350.42 12
 -4 7 -5 9553.75 735.02 3
 -4 7 -5 8484.72 307.673 35
 -4 7 -5 9935.45 352.759 34
 4 -7 5 9767.52 354.77 17
 4 -7 6 5250.28 662.469 29
 -4 7 -6 5622.77 563.258 4
 -4 7 -6 5818.21 275.207 13
 -4 7 -6 5338.44 265.068 12
 -4 7 -6 5613.25 581.254 3
 -4 7 -6 5863.4 259.761 35
 -4 7 -6 5588.08 269.627 34
 4 -7 6 5348.42 271.287 17
 -4 7 -7 8301.49 329.652 13
 4 -7 7 8008.88 337.857 17
 -4 7 -7 8888.26 320.061 35
 -4 7 -7 8556.47 337.712 12
 4 -7 7 8894.27 319.242 37
 -4 7 -7 8321.54 329.368 34
 -4 7 -8 6682.84 291.739 34
 -4 7 -8 7028.39 292.497 13
 -4 7 -8 6576.11 291.525 12
 4 -7 8 7555.73 295.641 37
 -4 7 -8 7509.66 290.25 35
 4 -7 8 6816.93 306.818 17
 -4 7 -9 1523.21 140.011 12
 -4 7 -9 1555.32 138.907 34
 4 -7 9 1565.32 134.307 32
 -4 7 -9 1748.81 135.474 35
 4 -7 9 1485.63 150.414 17
 4 -7 9 1574.8 137.176 37
 4 -7 10 626.625 98.6919 17
 -4 7 -10 578.706 85.4286 12
 4 -7 10 609.591 78.2722 37
 -4 7 -10 595.904 81.3699 34
 4 -7 11 175.212 54.6508 17
 4 -7 11 339.942 54.8004 37
 -4 7 -11 301.978 57.2331 12
 -4 7 -11 323.239 49.8455 34
 4 -7 12 -1.44082 20.1322 17
 4 -6 -11 16.9981 27.2842 35
 -4 6 11 6.49724 27.4202 23
 4 -6 -11 24.8627 27.218 39
 -4 6 11 -1.64238 22.1814 21
 -4 6 11 -4.23458 22.687 18
 -4 6 10 34.6774 28.7042 24
 -4 6 10 41.2672 47.027 23
 4 -6 -10 34.7158 38.2237 39
 4 -6 -10 3.54235 53.7603 35
 -4 6 10 29.4245 45.4389 18
 -4 6 10 -2.88981 36.3126 33
 -4 6 9 104.961 52.8634 24
 -4 6 9 20.2086 51.4539 18
 4 -6 -9 -20.2539 65.7777 35
 -4 6 9 60.2902 54.2445 33
 4 -6 -9 -19.1453 59.2187 39
 -4 6 8 131.606 52.2894 24
 4 -6 -8 209.431 95.7461 35
 -4 6 8 113.548 71.4642 19
 -4 6 8 94.8024 70.8403 18
 -4 6 8 90.9187 64.4687 33
 4 -6 -8 30.8209 57.1854 39
 -4 6 7 -19.9646 34.464 24
 -4 6 7 69.6698 53.2598 19
 -4 6 7 -9.99692 46.6753 18
 4 -6 -7 122.216 72.5758 39
 -4 6 7 119.135 68.1249 33
 4 -6 -7 41.5879 43.5139 17
 4 -6 -6 -95.0213 166.896 27
 4 -6 -6 -44.9318 84.2774 25
 -4 6 6 -0.88782 21.5377 24
 4 -6 -6 8.65843 46.1099 39
 -4 6 6 69.7027 53.5108 33
 -4 6 6 -3.51252 39.878 19
 -4 6 6 -22.0134 123.067 2
 -4 6 6 67.6363 54.0335 18
 4 -6 -6 71.6204 42.4318 36
 4 -6 -6 93.5558 47.9684 17
 4 -6 -5 1233.41 248.556 27
 4 -6 -5 1033.4 115.529 17
 4 -6 -5 1069.95 245.922 25
 -4 6 5 1259.44 131.159 19
 4 -6 -5 1149.51 123.161 36
 -4 6 5 753.576 195.004 2
 -4 6 5 1151.44 129.009 33
 -4 6 4 286.958 130.554 30
 4 -6 -4 409.38 137.987 27
 4 -6 -4 118.436 123.8 25
 -4 6 4 301.7 112.196 2
 -4 6 4 182.495 84.7173 1
 -4 6 3 5831.24 491.545 30
 4 -6 -3 5366.4 460.723 27
 -4 6 3 5534.55 469.103 2
 4 -6 -3 5715.06 507.069 25
 -4 6 3 5938.23 469.825 1
 -4 6 2 5903.07 494.529 30
 4 -6 -2 5905.82 426.468 29
 4 -6 -2 5116.62 452.462 27
 4 -6 -2 5613.23 466.499 25
 -4 6 2 5991.96 458.979 2
 -4 6 2 5589.6 449.353 1
 -4 6 1 1196.6 229.34 30
 4 -6 -1 1433.35 212.143 29
 4 -6 -1 1109.61 228.077 27
 4 -6 -1 1275.31 222.785 25
 -4 6 1 1351.16 237.588 1
 -4 6 1 1642.72 245.531 2
 -4 6 0 69.8457 82.2712 30
 4 -6 0 -85.152 86.922 29
 4 -6 0 246.09 110.601 27
 4 -6 0 12.1006 33.3959 26
 -4 6 0 -13.3585 109.739 4
 4 -6 0 35.4101 97.7062 25
 -4 6 0 -259.143 117.871 1
 -4 6 -1 11184.4 660.562 30
 -4 6 -1 11175.8 635.1 1
 4 -6 1 10613 656.331 29
 -4 6 -1 10883.3 668.96 4
 4 -6 1 11644.4 572.581 26
 4 -6 1 11581.2 551.456 25
 4 -6 1 11145.6 648.667 27
 4 -6 2 1742.78 309.352 29
 4 -6 2 1199.88 232.438 27
 4 -6 2 2499.3 289.816 26
 -4 6 -2 1745.94 267.209 4
 -4 6 -2 1826.67 296.977 30
 4 -6 3 1063.87 242.662 27
 4 -6 3 1400.52 259.926 26
 -4 6 -3 1625.76 269.613 4
 4 -6 4 11835.4 883.371 29
 -4 6 -4 13210.8 776.601 4
 4 -6 4 13270.1 763.305 27
 4 -6 4 13430.1 883.224 26
 -4 6 -4 13656.2 807.293 3
 4 -6 5 -39.2097 207.715 29
 -4 6 -5 249.798 127.374 4
 -4 6 -5 182.509 103.481 3
 4 -6 6 8242.75 762.453 29
 -4 6 -6 8010.85 656.137 4
 -4 6 -6 8699.87 325.874 13
 -4 6 -6 8302.23 326.412 12
 -4 6 -6 7582.02 659.837 3
 4 -6 6 8129.93 361.082 20
 -4 6 -6 8329.09 323.189 34
 4 -6 6 8663.2 338.657 17
 4 -6 6 8950.87 325.48 37
 4 -6 7 28048.6 1369.2 29
 -4 6 -7 24394.5 1153.28 4
 -4 6 -7 26182.3 570.083 13
 -4 6 -7 23915.1 560.865 12
 -4 6 -7 26011.2 1231.32 3
 4 -6 7 25424.4 559.885 37
 -4 6 -7 23315.3 547.359 34
 4 -6 7 25110 591.52 17
 -4 6 -8 13933 404.354 13
 -4 6 -8 12386 406.976 12
 4 -6 8 12912.2 402.186 37
 -4 6 -8 12090.7 390.601 34
 4 -6 8 12508.8 414.477 17
 4 -6 8 13290.6 397.561 32
 -4 6 -9 10002.8 352.636 12
 4 -6 9 10198.4 347.926 37
 -4 6 -9 9922.04 342.819 34
 4 -6 9 10407.5 371.762 17
 -4 6 -10 2016.38 144.628 34
 -4 6 -10 2099.96 155.26 12
 4 -6 10 2174.73 151.844 37
 4 -6 10 2135.78 161.74 17
 4 -6 11 36.8492 40.4563 17
 4 -6 11 10.4484 36.1936 37
 -4 6 -11 23.4218 33.6358 34
 4 -6 12 1.5454 21.3151 17
 4 -6 12 21.0477 20.0197 37
 -4 5 12 28.066 21.1956 24
 -4 5 12 69.5158 26.6788 21
 4 -5 -12 61.4372 24.0046 39
 4 -5 -12 42.8787 28.4105 35
 -4 5 11 1370.79 108.065 24
 -4 5 11 1410.74 109.312 23
 4 -5 -11 1328.71 109.474 39
 4 -5 -11 1280.12 107.472 35
 -4 5 11 1261.31 105.181 18
 -4 5 11 1522.48 97.82 33
 -4 5 10 2672.9 171.711 24
 -4 5 10 2644.79 170.586 23
 4 -5 -10 2439.21 167.531 39
 -4 5 10 2620.37 150.505 38
 4 -5 -10 2303.81 164.857 35
 -4 5 10 2443.79 167.389 18
 -4 5 10 2671.39 165.549 33
 -4 5 9 1554.53 144.805 24
 4 -5 -9 1460.05 147.816 39
 -4 5 9 1542.79 131.845 38
 -4 5 9 1465.17 144.482 19
 4 -5 -9 1499.72 152.43 35
 -4 5 9 1352.07 141.086 18
 -4 5 9 1478.97 141.531 33
 -4 5 8 484.522 91.0223 18
 -4 5 8 523.63 89.8013 24
 -4 5 8 501.731 102.729 19
 4 -5 -8 443.718 93.6375 39
 4 -5 -8 614.642 118.079 35
 -4 5 8 485.968 89.751 33
 4 -5 -7 365.808 161.335 25
 4 -5 -7 382.541 76.5278 36
 -4 5 7 478.043 82.9637 24
 4 -5 -7 411.753 75.4132 17
 -4 5 7 470.648 91.8395 33
 -4 5 7 433.157 89.9994 19
 -4 5 7 494.37 92.066 18
 4 -5 -7 525.188 97.5039 39
 4 -5 -6 233.482 176.547 25
 -4 5 6 75.2763 44.6469 24
 4 -5 -6 120.222 50.1073 36
 -4 5 6 112.085 45.898 19
 -4 5 6 166.554 55.4488 18
 -4 5 6 32.428 43.5241 33
 4 -5 -6 72.1943 41.3909 39
 4 -5 -6 6.01225 42.9362 17
 -4 5 5 270.639 117.959 30
 4 -5 -5 268.975 119.838 27
 4 -5 -5 187.64 138.205 25
 -4 5 5 476.343 149.905 1
 -4 5 5 88.5937 97.4773 2
 -4 5 4 2326.7 303.698 30
 4 -5 -4 1898.28 273.902 27
 -4 5 4 2137.15 280.582 2
 4 -5 -4 1949.15 296.621 25
 -4 5 4 1976.6 279.98 1
 -4 5 3 58.7342 95.5721 30
 4 -5 -3 -33.6336 98.5636 27
 4 -5 -3 88.4632 102.925 25
 -4 5 3 185.07 111.514 1
 -4 5 3 324.639 108.217 2
 -4 5 2 411.071 153.439 30
 4 -5 -2 360.993 115.878 29
 4 -5 -2 270.707 116.415 27
 4 -5 -2 423.727 144.106 25
 -4 5 2 80.8468 89.9659 1
 -4 5 2 235.592 87.3257 2
 -4 5 1 29973.1 989.536 30
 4 -5 -1 32591.4 910.812 29
 4 -5 -1 28184.2 938.867 27
 4 -5 -1 29406.7 928.829 25
 -4 5 1 29635.3 895.659 2
 -4 5 1 30582.4 981.628 1
 -4 5 0 -112.75 114.237 30
 4 -5 0 -13.545 98.0225 29
 4 -5 0 49.3613 88.2848 27
 4 -5 0 -41.2952 57.4478 26
 4 -5 0 75.4442 83.3552 25
 -4 5 0 -145.45 116.505 1
 -4 5 -1 39171.5 1137.33 30
 4 -5 1 40724 1217.98 29
 -4 5 -1 40311.5 1186.33 4
 4 -5 1 38725.8 1128.51 27
 -4 5 -1 39828 1135.67 1
 4 -5 2 6174.83 542.826 29
 -4 5 -2 6505.44 483.098 4
 -4 5 -2 6652.66 483.207 1
 4 -5 2 6684.1 488.988 27
 4 -5 2 7725.36 509 26
 -4 5 -2 7354.29 492.016 30
 4 -5 3 6017.33 581.571 29
 -4 5 -3 5961.12 481.372 4
 4 -5 3 6488.45 504.901 27
 4 -5 3 6241.44 525.73 26
 -4 5 -3 6692.69 486.779 30
 4 -5 4 700.125 280.296 29
 4 -5 4 842.587 195.615 27
 4 -5 4 1583.08 306.792 26
 -4 5 -4 836.545 194.589 4
 -4 5 -4 844.787 224.405 3
 4 -5 5 1961.14 382.718 29
 4 -5 5 2187.37 346.742 26
 -4 5 -5 1266.13 252.212 4
 -4 5 -5 1490.41 277.503 3
 4 -5 6 6845.29 655.604 29
 -4 5 -6 6909.64 589.453 4
 -4 5 -6 7141.22 295.586 12
 -4 5 -6 6676.4 594.11 3
 4 -5 6 7162.06 292.332 37
 4 -5 6 7276.16 321.862 20
 -4 5 -6 6940.45 290.287 34
 4 -5 6 7263.63 305.442 17
 4 -5 7 -154.219 129.311 29
 4 -5 7 293.447 68.7262 17
 -4 5 -7 -47.0115 112.111 4
 -4 5 -7 314.461 78.3355 12
 4 -5 7 260.211 71.0688 20
 4 -5 7 164.477 62.6025 37
 -4 5 -7 93.2697 127.046 3
 -4 5 -7 246.213 66.2793 34
 4 -5 8 298.77 79.7341 17
 -4 5 -8 372.952 86.129 34
 -4 5 -8 342.664 81.4973 12
 4 -5 8 354.738 84.9034 20
 4 -5 8 269.343 77.6149 37
 -4 5 -9 5525.53 261.547 34
 -4 5 -9 5935.49 275.435 12
 4 -5 9 5547.5 244.634 20
 4 -5 9 5914.78 275.073 37
 4 -5 9 5724.41 274.808 17
 4 -5 10 459.162 86.7973 17
 -4 5 -10 433.357 79.0028 34
 -4 5 -10 404.344 83.8646 12
 4 -5 10 331.207 77.8093 37
 -4 5 -11 563.485 80.339 12
 4 -5 11 599.616 75.6409 37
 -4 5 -11 607.435 70.8577 34
 4 -5 11 705.905 83.1033 17
 -4 5 -12 30.9518 25.0305 12
 4 -5 12 13.9576 19.6675 37
 -4 4 12 -3.64253 35.0202 24
 -4 4 12 -14.1455 30.9412 23
 4 -4 -12 7.30638 35.3531 39
 -4 4 12 45.0291 28.6211 38
 4 -4 -12 31.2771 39.9252 35
 -4 4 11 -2.14367 44.1649 24
 -4 4 11 36.9025 45.1281 23
 -4 4 11 85.8056 45.755 38
 4 -4 -11 42.7969 52.2618 39
 4 -4 -11 28.1792 46.1365 35
 -4 4 11 3.81945 41.095 18
 -4 4 10 2945.41 195.424 24
 -4 4 10 2771.95 184.996 23
 4 -4 -10 2734.09 190.642 39
 -4 4 10 2950.17 183.083 38
 4 -4 -10 2816.01 191.14 35
 -4 4 10 2868.63 189.005 18
 -4 4 10 3020.4 180.931 33
 -4 4 9 5238.88 265.575 24
 4 -4 -9 5478.87 270.644 39
 -4 4 9 5434.65 268.846 19
 -4 4 9 5395.76 255.279 38
 4 -4 -9 5206.2 274.037 35
 -4 4 9 5720.71 274.276 18
 -4 4 9 5230.01 252.257 33
 -4 4 8 79.3895 37.324 24
 4 -4 -8 66.9053 43.1042 39
 4 -4 -8 -51.0924 50.4281 36
 -4 4 8 28.2152 26.2486 38
 -4 4 8 -1.56151 57.4491 19
 4 -4 -8 7.94138 59.1238 35
 -4 4 8 57.0635 58.5076 33
 4 -4 -8 -3.36153 40.4753 17
 -4 4 8 -41.7215 43.6331 18
 -4 4 7 684.869 188.607 1
 4 -4 -7 507.571 213.363 25
 -4 4 7 384.091 75.4748 24
 -4 4 7 404.889 82.7523 18
 4 -4 -7 280.504 69.7584 36
 -4 4 7 340.045 66.4341 38
 -4 4 7 384.93 80.0111 19
 4 -4 -7 363.764 75.8924 39
 -4 4 7 376.978 75.3147 33
 4 -4 -7 278.506 68.2714 17
 -4 4 6 150.626 146.915 1
 4 -4 -6 -126.908 87.2336 27
 4 -4 -6 -66.2034 133.724 25
 -4 4 6 -24.2579 86.8328 2
 -4 4 5 5168.6 436.429 30
 4 -4 -5 4522.27 385.239 27
 -4 4 5 4761.44 391.52 2
 4 -4 -5 4517.78 443.239 25
 -4 4 5 4928.99 426.514 1
 4 -4 -5 5066.97 463.645 31
 -4 4 4 12677.4 654.347 30
 4 -4 -4 12710.6 623.944 27
 -4 4 4 13452.1 607.927 2
 4 -4 -4 12677.8 688.957 25
 -4 4 4 12569.3 644.272 1
 -4 4 3 857.227 180.566 30
 4 -4 -3 1089.81 177.881 27
 -4 4 3 1115.53 203.229 1
 4 -4 -3 1194.73 219.028 25
 -4 4 3 1044.54 172.622 2
 4 -4 -2 18104.4 699.413 27
 -4 4 2 18373.8 738.789 30
 4 -4 -2 19882 595.448 29
 4 -4 -2 17773.4 723.349 25
 -4 4 2 19177.2 650.681 2
 -4 4 2 17705.5 720.994 1
 4 -4 -1 8387.31 429.006 29
 4 -4 -1 7818.21 461.569 27
 4 -4 -1 8270.52 329.455 26
 4 -4 -1 6852.15 427.616 25
 -4 4 1 8023.37 409.414 2
 -4 4 1 8175.28 494.201 30
 -4 4 1 7792.03 477.864 1
 -4 4 0 65434 1359.2 30
 4 -4 0 64760.9 1333.14 29
 4 -4 0 65268.1 1346.59 27
 4 -4 0 63038.2 1228.53 25
 -4 4 0 64954.4 1364.52 1
 -4 4 -1 68.7067 93.7693 30
 4 -4 1 73.2031 112.452 29
 -4 4 -1 -104.017 116.817 1
 4 -4 1 24.6736 81.7366 27
 4 -4 1 -12.6077 67.7476 26
 -4 4 -1 -200.165 106.432 4
 -4 4 -2 23553 833.635 30
 -4 4 -2 23005.1 839.369 1
 -4 4 -2 22065.3 827.425 4
 4 -4 2 23989.8 884.682 27
 4 -4 2 22807 828.521 26
 -4 4 -2 24585.9 765.879 28
 -4 4 -3 25311.8 872.351 30
 4 -4 3 22021.6 1012.28 29
 -4 4 -3 23277 791.439 28
 -4 4 -3 22577.7 863.731 4
 4 -4 3 23749 921.224 27
 4 -4 3 23556.7 937.167 26
 4 -4 4 3738.92 469.692 29
 -4 4 -4 4038.3 352.606 28
 -4 4 -4 3295.27 354.633 4
 4 -4 4 4379.09 437.087 26
 -4 4 -4 3837.27 394.054 3
 4 -4 4 3769.26 395.437 31
 4 -4 5 41.8766 158.04 29
 -4 4 -5 71.8998 87.4154 28
 4 -4 5 -41.973 113.992 26
 -4 4 -5 144.666 104.046 4
 -4 4 -5 -33.087 67.2956 3
 4 -4 6 2703.81 386.324 29
 -4 4 -6 3131.46 385.892 28
 4 -4 6 2567.04 179.722 24
 -4 4 -6 3053.67 364.766 4
 4 -4 6 2709.33 190.191 20
 -4 4 -6 2990.27 190.975 12
 4 -4 6 2928.32 192.039 37
 -4 4 -6 2746.53 182.329 34
 4 -4 6 2935.48 194.956 17
 -4 4 -6 2567.31 343.871 3
 4 -4 7 286.435 136.279 29
 4 -4 7 239.188 73.4411 24
 4 -4 7 316.152 78.5647 20
 -4 4 -7 242.295 74.6056 12
 -4 4 -7 203.159 59.513 39
 4 -4 7 195.363 60.4774 38
 4 -4 7 268.804 74.7378 37
 -4 4 -7 224.702 115.413 3
 -4 4 -7 325.915 82.3035 34
 4 -4 7 167.121 60.3755 17
 4 -4 8 -24.8717 42.1517 17
 -4 4 -8 17.67 56.634 12
 4 -4 8 129.673 56.4348 38
 4 -4 8 10.0686 42.0866 20
 -4 4 -8 6.3625 50.8473 34
 4 -4 8 -67.5262 65.355 37
 4 -4 9 175.169 61.3488 17
 -4 4 -9 191.05 73.1841 12
 4 -4 9 248.383 61.0965 38
 4 -4 9 124.333 49.0789 20
 4 -4 9 110.587 72.1088 37
 -4 4 -9 194.384 73.7604 34
 -4 4 -10 1492.92 132.447 34
 -4 4 -10 1349.33 134.84 12
 4 -4 10 1407.22 114.759 38
 4 -4 10 1247.27 128.821 37
 4 -4 10 1327.18 124.086 17
 -4 4 -11 935.932 95.8914 12
 -4 4 -11 875.902 86.4976 34
 4 -4 11 837.169 74.5631 38
 4 -4 11 859.345 89.9818 37
 4 -4 11 828.071 78.8335 17
 -4 4 -12 540.531 52.2464 12
 4 -4 12 593.515 55.3083 37
 -4 3 13 1197.77 85.5468 24
 4 -3 -13 1098.21 76.6512 35
 -4 3 13 1033.71 72.5862 38
 4 -3 -13 1166.51 84.4088 39
 -4 3 12 86.8447 51.3854 24
 -4 3 12 11.3309 24.1459 23
 4 -3 -12 120.193 54.3863 39
 4 -3 -12 89.6531 50.5448 35
 -4 3 12 93.5089 47.5857 38
 -4 3 11 66.1462 60.5425 24
 -4 3 11 112.659 44.0143 37
 -4 3 11 150.766 53.7175 23
 4 -3 -11 1.58818 54.5532 39
 -4 3 11 108.486 61.4753 38
 -4 3 11 140.058 49.0394 18
 4 -3 -11 79.3015 51.0253 35
 -4 3 10 -4.33882 50.8847 24
 -4 3 10 12.6434 39.0412 23
 4 -3 -10 -16.8888 50.677 39
 -4 3 10 70.689 39.6721 37
 4 -3 -10 36.9127 52.7207 35
 -4 3 10 2.65658 49.2825 38
 -4 3 10 -25.407 41.4786 18
 -4 3 9 1418.91 141.719 24
 4 -3 -9 1336.43 140.78 39
 -4 3 9 1438.56 141.904 38
 -4 3 9 1422.54 140.654 19
 -4 3 9 1679.25 143.897 33
 4 -3 -9 1599.41 157.22 35
 4 -3 -9 1731.26 149.243 36
 -4 3 9 1561.03 143.507 18
 4 -3 -8 1869.17 155.026 36
 4 -3 -8 2025.82 322.002 25
 -4 3 8 1899.26 160.855 24
 4 -3 -8 1731.73 150.336 39
 -4 3 8 1587.32 141.699 18
 -4 3 8 1611.81 145.229 33
 -4 3 8 1914.88 155.859 19
 4 -3 -8 1912.08 165.355 35
 -4 3 8 1603.29 140.907 38
 4 -3 -8 1645.49 150.309 17
 -4 3 8 2167.25 337.851 1
 -4 3 7 7288.42 567.969 1
 4 -3 -7 7405.71 593.815 25
 -4 3 6 -136.16 75.7524 30
 4 -3 -6 77.4401 125.315 25
 -4 3 6 127.656 69.0201 2
 -4 3 6 -81.477 79.8235 1
 -4 3 5 52.9208 96.7879 30
 4 -3 -5 187.953 74.6439 27
 4 -3 -5 -90.6624 105.802 25
 -4 3 5 190.705 72.8782 2
 -4 3 5 87.0672 110.64 1
 -4 3 4 48470.7 1229.4 30
 4 -3 -4 49962.1 1108.38 27
 4 -3 -4 51688.4 1290.74 25
 -4 3 4 48768.7 1211.01 1
 4 -3 -4 48713.8 1320.89 31
 -4 3 3 5097.4 392.591 30
 4 -3 -3 5030.9 349.662 27
 -4 3 3 5104.3 299.335 2
 4 -3 -3 4739.86 384.523 25
 -4 3 3 5120.06 390.371 1
 4 -3 -3 4221.37 432.69 31
 -4 3 2 12433.8 587.923 30
 4 -3 -2 11994.5 409.318 29
 4 -3 -2 12112.3 525.631 27
 4 -3 -2 12492.5 571.399 25
 -4 3 2 12685.6 437.631 2
 -4 3 2 12442.7 575.394 1
 -4 3 1 3999.59 336.209 30
 4 -3 -1 4250.67 294.728 29
 4 -3 -1 3946.06 316.22 27
 4 -3 -1 4112.32 320.926 25
 -4 3 1 3917.5 326.537 1
 -4 3 0 1760.15 232.03 30
 4 -3 0 2238.81 259.924 29
 4 -3 0 2150.04 247.909 27
 -4 3 0 2345.88 260.837 1
 4 -3 1 3549.17 396.405 31
 -4 3 -1 4265.54 331.205 30
 -4 3 -1 4501.28 343.461 4
 4 -3 1 4556.98 390.234 29
 4 -3 1 4000.99 333.977 27
 -4 3 -1 4208.62 339.695 1
 -4 3 -2 1175.26 167.29 30
 4 -3 2 1081.41 241.725 29
 -4 3 -2 1143.12 194.196 28
 4 -3 2 1467.76 223.813 27
 4 -3 2 1326.4 183.071 26
 -4 3 -2 1182.25 183.253 4
 4 -3 2 831.213 199.561 31
 -4 3 -2 1120.47 188.765 1
 -4 3 -3 6334.41 438.413 28
 -4 3 -3 7040.51 459.953 4
 4 -3 3 7190.31 440.911 26
 4 -3 3 6148.1 498.452 29
 4 -3 3 6029.43 446.219 31
 -4 3 -3 7511.47 436.477 30
 4 -3 4 5213.22 486.669 29
 -4 3 -4 4644.82 407.94 28
 -4 3 -4 5233.63 415.453 4
 4 -3 4 5978.03 445.707 26
 -4 3 -4 5324.65 453.549 3
 4 -3 5 8587.01 644.733 29
 -4 3 -5 7878.26 563.976 28
 -4 3 -5 9872 582.249 4
 4 -3 5 9889.19 615.447 26
 -4 3 -5 8139.01 589.372 3
 4 -3 6 4.68606 45.5593 17
 4 -3 6 -330.224 150.122 29
 -4 3 -6 -107.68 114.136 28
 4 -3 6 -0.2922 40.0816 24
 4 -3 6 -38.6492 45.359 23
 -4 3 -6 -90.0235 48.2788 12
 4 -3 6 -67.0916 57.9083 38
 4 -3 6 4.89556 36.153 20
 4 -3 6 38.4994 40.6021 37
 -4 3 -6 287.235 130.005 3
 -4 3 -6 0.56787 21.6317 34
 4 -3 7 4920.37 533.664 29
 -4 3 -7 3593.93 424.648 28
 4 -3 7 3970.75 229.862 24
 4 -3 7 4095.25 458.153 2
 -4 3 -7 3933.82 227.627 12
 4 -3 7 4198.33 229.055 38
 4 -3 7 3971.02 230.643 37
 -4 3 -7 3877.13 226.359 34
 4 -3 7 4033.5 229.265 17
 4 -3 7 4249.24 231.954 20
 4 -3 8 3409.44 218.909 24
 -4 3 -8 3434.37 215.464 12
 4 -3 8 3251.81 204.815 20
 4 -3 8 3495.54 211.832 38
 4 -3 8 3179.56 206.353 37
 -4 3 -8 3194.97 208.903 34
 4 -3 8 3573.87 215.851 17
 4 -3 9 20.4826 38.6711 17
 4 -3 9 46.1189 48.513 20
 -4 3 -9 0.86452 55.3789 12
 4 -3 9 -16.8267 49.4408 38
 4 -3 9 -15.8737 58.5538 37
 -4 3 -9 -22.986 50.7065 34
 4 -3 10 -60.9644 40.8535 17
 -4 3 -10 60.5312 65.7955 12
 4 -3 10 61.9924 42.3484 38
 4 -3 10 -107.25 42.0067 20
 4 -3 10 -14.3691 53.1547 37
 -4 3 -10 21.9651 51.4265 34
 -4 3 -11 170.431 54.9509 12
 4 -3 11 226.054 45.7289 38
 4 -3 11 223.642 55.0735 37
 -4 3 -11 171.977 48.9858 34
 -4 3 -12 213.472 32.6825 12
 -4 2 13 16.117 33.4979 24
 4 -2 -13 -39.4805 37.7281 39
 -4 2 13 -5.45391 36.1732 38
 -4 2 13 48.2087 22.6059 37
 4 -2 -13 -5.89685 35.1833 35
 -4 2 12 -25.7773 51.0555 24
 4 -2 -12 -3.77319 57.7214 39
 -4 2 12 73.6291 38.0921 37
 4 -2 -12 77.9375 54.6578 35
 -4 2 12 -12.4235 48.233 38
 -4 2 11 391.369 86.6766 24
 4 -2 -11 557.075 96.3591 39
 -4 2 11 536.421 90.8008 37
 -4 2 11 464.753 94.692 38
 4 -2 -11 528.373 94.3736 35
 4 -2 -11 388.495 77.2561 10
 -4 2 10 4809.4 258.139 24
 -4 2 10 5529.89 251.291 23
 4 -2 -10 4367.47 243.27 39
 -4 2 10 4552.18 243.741 38
 4 -2 -10 4904.08 247.881 10
 4 -2 -10 4578.53 241.981 35
 4 -2 -10 5181.85 246.493 36
 4 -2 -9 9290.69 336.74 36
 -4 2 9 8026.48 654.458 1
 4 -2 -9 9840.21 702.342 25
 -4 2 9 9408.54 352.871 24
 4 -2 -9 9067.39 342.722 39
 -4 2 9 8890.15 335.335 38
 4 -2 -9 9707.57 699.138 6
 -4 2 9 9439.72 340.559 19
 4 -2 -9 8585.73 325.656 10
 4 -2 -9 9006.02 340.151 35
 4 -2 -8 619.738 185.685 25
 -4 2 8 395.96 76.0517 24
 4 -2 -8 364.813 75.02 7
 4 -2 -8 514.212 84.9484 39
 -4 2 8 717.215 184.281 1
 4 -2 -8 513.212 87.6028 36
 -4 2 8 406.57 68.3804 19
 4 -2 -8 627.142 98.457 35
 4 -2 -8 678.214 194.184 6
 4 -2 -8 449.202 88.4134 10
 4 -2 -8 381.324 78.8566 17
 -4 2 7 9870.84 623.268 30
 4 -2 -7 10876 645.958 6
 -4 2 7 10319 659.322 1
 4 -2 -7 10175.7 656.522 25
 -4 2 6 884.757 193.929 30
 4 -2 -6 848.009 198.175 25
 -4 2 6 1159.24 225.306 1
 4 -2 -6 1028.74 177.295 6
 4 -2 -5 494.343 143.033 31
 4 -2 -5 780.852 136.22 27
 4 -2 -5 865.105 194.21 25
 -4 2 5 618.892 165.973 30
 4 -2 -5 504.441 127.813 6
 -4 2 5 667.935 174.342 1
 -4 2 4 113.813 138.205 30
 4 -2 -4 127.334 79.452 27
 4 -2 -4 65.3851 112.489 25
 4 -2 -4 130.48 133.081 31
 4 -2 -4 25.8231 60.5941 6
 -4 2 4 -152.867 115.718 1
 4 -2 -3 503.848 120.924 27
 4 -2 -3 267.335 134.235 25
 4 -2 -3 442.005 180.182 31
 -4 2 3 373.373 64.968 2
 4 -2 -3 291.27 76.6141 6
 -4 2 3 178.553 140.414 30
 -4 2 3 364.372 124.972 1
 -4 2 2 6615 429.495 30
 4 -2 -2 6590.95 365.134 27
 4 -2 -2 7162.3 422.557 25
 -4 2 2 7105.79 417.019 1
 4 -2 -2 6484.84 481.591 31
 -4 2 1 18148.8 664.331 30
 4 -2 -1 19840.4 496.636 29
 4 -2 -1 18165.7 618.375 27
 4 -2 -1 18578.7 772.279 31
 -4 2 1 18338 648.553 1
 4 -2 -1 19334.1 477.697 5
 -4 2 0 1139.1 183.829 30
 4 -2 0 1001.96 150.292 29
 4 -2 0 1069.95 175.758 27
 4 -2 0 1015.19 213.532 31
 -4 2 0 1257.97 177.22 1
 -4 2 -1 668.547 134.793 30
 4 -2 1 793.893 186.193 31
 4 -2 1 744.553 145.461 29
 4 -2 1 898.471 175.263 27
 -4 2 -1 613.149 128.965 4
 -4 2 -1 862.271 146.954 1
 4 -2 2 8813.89 511.961 29
 -4 2 -2 8751.84 449.111 4
 -4 2 -2 8876.29 501.576 28
 -4 2 -2 8153.63 461.267 1
 4 -2 2 9242.45 376.652 26
 -4 2 -2 9613.97 448.585 30
 4 -2 2 8910.4 503.068 31
 4 -2 3 4225.71 388.843 29
 -4 2 -3 4340.73 373.246 28
 -4 2 -3 4631.39 338.886 4
 4 -2 3 4544.35 323.919 26
 4 -2 3 4745.06 362.506 31
 4 -2 4 87.6578 128.018 29
 4 -2 4 -129.932 63.4418 26
 4 -2 5 4083.72 430.687 29
 -4 2 -5 3863.57 409.702 28
 4 -2 5 4751.65 412.65 26
 -4 2 -5 4484.96 421.906 3
 4 -2 6 489.799 183.536 5
 -4 2 -6 591.607 171.178 28
 4 -2 6 106.845 134.691 29
 4 -2 6 545.882 90.7161 24
 4 -2 6 846.791 223.742 2
 4 -2 6 529.922 86.5369 23
 -4 2 -6 560.273 86.6817 12
 4 -2 6 590.451 91.3382 38
 4 -2 6 559.325 90.2417 37
 4 -2 6 429.46 81.8365 20
 4 -2 7 242.354 139.487 5
 -4 2 -7 232.931 180.757 28
 4 -2 7 29.841 48.8159 24
 4 -2 7 53.7315 54.5796 23
 4 -2 7 74.8951 101.432 2
 4 -2 7 8.49683 58.3849 20
 -4 2 -7 37.3513 43.9127 12
 4 -2 7 -3.62978 57.3158 38
 4 -2 7 -87.1982 56.2571 37
 4 -2 8 4249.73 241.548 24
 4 -2 8 4350.2 250.987 23
 -4 2 -8 3685.4 221.295 12
 4 -2 8 4049.27 230.923 38
 4 -2 8 3958.89 228.298 37
 -4 2 -8 4000.08 232.699 34
 4 -2 8 4252.35 234.144 20
 4 -2 9 835.649 113.961 24
 -4 2 -9 871.663 113.356 12
 4 -2 9 750.918 110.87 37
 4 -2 9 838.706 110.139 38
 4 -2 9 867.312 108.936 20
 -4 2 -9 870.587 118.69 34
 -4 2 -10 1821.2 140.716 12
 4 -2 10 2051.39 135.618 20
 4 -2 10 1828.75 135.483 37
 -4 2 -10 1913.87 140.116 34
 4 -2 10 1701.58 131.308 38
 -4 2 -11 963.707 84.3173 12
 4 -2 11 971.368 79.8093 38
 -4 2 -11 1073.24 83.1088 34
 4 -2 11 953.455 79.8486 37
 -4 1 14 340.729 43.0377 24
 4 -1 -14 333.723 45.3178 39
 -4 1 14 317.871 45.9797 38
 4 -1 -14 283.473 38.1224 35
 -4 1 13 -38.9086 41.8759 24
 4 -1 -13 33.9852 25.1493 13
 -4 1 13 40.3514 35.75 37
 4 -1 -13 13.5411 39.883 39
 4 -1 -13 30.2463 36.5827 35
 -4 1 13 -17.6453 53.3154 38
 4 -1 -12 497.221 86.5708 10
 -4 1 12 457.05 87.2514 24
 -4 1 12 601.123 100.236 38
 4 -1 -12 618.91 94.2136 39
 -4 1 12 573.529 92.3648 37
 4 -1 -12 372.734 74.8877 35
 -4 1 11 2218.26 176.968 24
 4 -1 -11 2352.71 165.933 36
 4 -1 -11 2345.8 175.986 39
 -4 1 11 2490.98 183.589 38
 4 -1 -11 2412.21 178.237 10
 4 -1 -11 2172.27 164.506 35
 -4 1 10 3320.17 215.146 24
 4 -1 -10 3194.98 206.85 39
 -4 1 10 3283.61 211.266 38
 4 -1 -10 3275.32 213.23 10
 4 -1 -10 3600.55 216.25 36
 4 -1 -10 3164.11 201.097 35
 -4 1 9 3677.65 440.022 1
 -4 1 9 3825.35 224.706 24
 4 -1 -9 3578.68 214.762 39
 -4 1 9 3490.78 207.892 38
 4 -1 -9 4148.32 227.913 36
 4 -1 -9 3613.4 216.611 10
 4 -1 -9 3182.23 414.488 6
 4 -1 -9 3679.64 211.014 35
 -4 1 8 8793.03 625.093 30
 -4 1 8 7886.97 617.027 1
 4 -1 -8 8504.9 601.769 25
 4 -1 -8 8639.03 629.927 6
 -4 1 7 8037.32 577.909 30
 -4 1 7 7260.76 548.363 1
 4 -1 -7 8073.07 548.488 25
 4 -1 -7 8395.1 576.406 6
 4 -1 -6 10206.8 521.698 31
 -4 1 6 9930.92 617.274 30
 -4 1 6 10237.1 601.048 1
 -4 1 6 10860.5 503.677 26
 4 -1 -6 9879.25 568.998 25
 4 -1 -6 10374.3 582.948 6
 4 -1 -5 5394.44 390.26 31
 -4 1 5 4531.22 402.842 30
 -4 1 5 4884.61 395.69 1
 4 -1 -5 4988.4 390.924 25
 4 -1 -5 5207.37 379.024 6
 -4 1 4 9003.3 538.477 30
 4 -1 -4 9502.36 362.55 27
 -4 1 4 8687.81 490.386 1
 4 -1 -4 8805.94 482.765 25
 4 -1 -4 9360.64 503.809 31
 4 -1 -4 9771.07 466.633 6
 4 -1 -3 200.305 132.054 31
 -4 1 3 123.619 135.203 30
 4 -1 -3 257.283 83.3264 27
 4 -1 -3 147.451 106.103 25
 -4 1 3 204.008 96.6094 1
 4 -1 -3 65.3841 82.3226 6
 -4 1 2 10997.7 534.593 30
 4 -1 -2 10747.7 428.931 27
 -4 1 2 10097.7 471.539 1
 4 -1 -2 10506.1 426.328 6
 4 -1 -2 11923.9 360.873 5
 4 -1 -2 11243.2 556.639 31
 4 -1 -1 529.87 169.075 31
 4 -1 -1 392.292 89.0415 5
 -4 1 1 387.466 139.15 30
 4 -1 -1 374.849 107.019 27
 -4 1 1 331.543 106.259 1
 4 -1 -1 697.705 126.25 6
 4 -1 0 195.735 130.707 31
 -4 1 0 55.9915 77.5495 30
 4 -1 0 67.9642 80.0438 5
 4 -1 0 124.714 71.5218 29
 -4 1 0 101.85 60.2424 1
 4 -1 1 8307.43 468.097 31
 -4 1 -1 8740.17 414.586 30
 4 -1 1 8141.31 432.259 29
 -4 1 -1 8704.08 386.977 4
 -4 1 -1 8188.37 417.119 1
 4 -1 1 7373.83 430.602 5
 -4 1 -2 18848.4 762.017 28
 -4 1 -2 20466.9 592.283 30
 4 -1 2 18465.7 732.13 29
 -4 1 -2 19133.6 564.898 4
 4 -1 2 18802.2 688.854 31
 4 -1 3 682.977 174.048 5
 4 -1 3 987.548 201.133 29
 -4 1 -3 597.233 168.349 28
 4 -1 3 755.978 153.016 26
 4 -1 3 829.989 185.005 2
 -4 1 -3 417.198 112.987 3
 4 -1 3 883.97 147.435 31
 4 -1 4 2353.49 316.998 5
 4 -1 4 2876.74 359.083 29
 -4 1 -4 3169.09 367.1 28
 4 -1 4 3163.96 308.484 26
 4 -1 4 3120.76 367.281 2
 -4 1 -5 12694.7 745.143 28
 -4 1 -5 13050.9 728.116 25
 4 -1 5 11268 740.668 5
 4 -1 5 12425.5 741.443 2
 4 -1 6 274.033 176.843 5
 -4 1 -6 222.146 117.356 28
 4 -1 6 31.6471 27.9932 24
 4 -1 6 199.552 64.7643 23
 4 -1 6 378.591 143.446 2
 -4 1 -6 129.732 43.6081 12
 4 -1 6 219.699 68.8989 38
 4 -1 6 24.1607 54.4883 20
 4 -1 6 201.204 62.9079 37
 4 -1 7 -89.9549 54.9148 24
 4 -1 7 60.601 53.1889 23
 -4 1 -7 39.3048 43.8722 12
 4 -1 7 -30.5521 55.7258 38
 4 -1 7 107.275 51.0004 37
 4 -1 7 67.5935 63.8192 20
 4 -1 8 247.921 70.7376 24
 4 -1 8 241.225 80.4913 23
 -4 1 -8 220.212 69.334 12
 4 -1 8 260.701 77.2172 38
 4 -1 8 235.06 77.4222 20
 4 -1 8 218.046 72.2352 37
 -4 1 -9 315.099 73.5994 12
 4 -1 9 287.418 84.6371 38
 4 -1 9 192.124 60.0344 20
 4 -1 9 337.486 72.3019 37
 -4 1 -9 273.953 73.8323 34
 4 -1 10 9.73701 30.9528 20
 -4 1 -10 -3.73113 37.8821 12
 4 -1 10 69.2931 44.418 38
 4 -1 10 82.3908 41.1416 37
 -4 1 -10 28.3016 48.104 34
 -4 1 -11 1281.16 76.6671 34
 -4 1 -11 1399.67 84.9868 12
 4 -1 11 1369.28 85.0814 38
 -4 0 14 395.804 52.3832 24
 4 0 -14 439.087 55.8782 39
 -4 0 14 412.415 58.5696 38
 -4 0 14 466.895 56.7583 37
 4 0 -14 445.713 52.6442 35
 -4 0 13 74.3569 40.353 24
 4 0 -13 106.726 38.3963 13
 4 0 -13 132.682 52.5169 39
 -4 0 13 55.7415 51.0163 38
 -4 0 13 107.76 53.1676 37
 4 0 -13 94.956 45.4631 35
 -4 0 12 578.918 96.6393 24
 4 0 -12 713.041 101.059 39
 -4 0 12 525.114 96.9371 38
 -4 0 12 544.835 96.3804 37
 4 0 -12 598.408 93.4958 35
 4 0 -12 549.061 100.009 10
 -4 0 11 3927.17 227.852 24
 4 0 -11 3783.72 219.957 39
 -4 0 11 3894.75 226.835 38
 4 0 -11 3768.74 216.084 36
 4 0 -11 3775.05 229.154 10
 4 0 -11 3767.54 212.517 35
 -4 0 10 126.511 59.0009 24
 -4 0 10 54.1188 50.7425 38
 4 0 -10 142.084 55.5041 35
 4 0 -10 89.3322 53.2238 39
 4 0 -10 95.2144 56.2908 36
 4 0 -10 0.32124 57.5797 10
 -4 0 9 179.649 54.3044 24
 -4 0 9 -77.4249 124.372 1
 4 0 -9 103.279 46.9369 39
 4 0 -9 -6.5661 43.9252 36
 4 0 -9 -25.5262 33.4266 35
 4 0 -9 -22.4196 39.8391 10
 -4 0 8 2340.83 326.835 30
 -4 0 8 2195.32 331.748 1
 4 0 -8 1816.81 310.754 6
 -4 0 7 7572.22 552.976 1
 -4 0 7 8306.77 607.843 30
 4 0 -7 8794.22 541.076 25
 4 0 -7 8473.17 588.082 6
 4 0 -6 344.565 108.784 31
 4 0 -6 129.26 93.5376 25
 -4 0 6 138.732 117.828 1
 -4 0 5 7864.24 533.693 30
 -4 0 5 8084.04 496.798 1
 4 0 -5 7447.17 454.146 31
 4 0 -5 7635.61 456.614 25
 4 0 -5 7486.05 470.651 6
 4 0 -4 16746.6 665.926 31
 -4 0 4 16946 735.097 30
 -4 0 4 15240.9 626.441 1
 4 0 -4 16635.8 648.971 6
 4 0 -3 14700.3 625.356 31
 -4 0 3 14237.7 569.738 1
 4 0 -3 14278.3 573.123 6
 -4 0 3 14292.1 633.516 30
 4 0 -3 15426.7 457.909 5
 4 0 -2 18139.3 697.784 31
 -4 0 2 17032.5 667.47 30
 -4 0 2 17052.7 592.562 1
 4 0 -2 17817.1 550.3 5
 4 0 -2 15953.5 595.861 6
 4 0 -1 110886 1702.44 31
 -4 0 1 109181 1620.77 30
 -4 0 1 109658 1444.62 1
 4 0 -1 109437 1576.21 6
 4 0 -1 113697 1524.84 5
 4 0 0 183.284 108.983 31
 4 0 0 356.197 122.401 5
 -4 0 0 387.818 107.24 30
 -4 0 0 199.898 80.754 1
 4 0 1 48995.4 1147.44 31
 4 0 1 51014.4 951.268 2
 -4 0 -1 55481.7 991.515 30
 -4 0 -1 55554 992.816 1
 -4 0 -1 51443.2 1254.48 28
 4 0 1 49843.4 1191.26 5
 4 0 2 36301.1 988.784 31
 -4 0 -2 37542.8 1123.56 28
 4 0 2 35371 1096.04 5
 4 0 2 37693.4 969.472 2
 4 0 3 10506.4 645.226 5
 -4 0 -3 10884.4 652.591 28
 4 0 3 10688.3 592.24 2
 4 0 4 7445.02 536.267 2
 -4 0 -4 7054.01 567.92 28
 -4 0 -4 7586.28 571.726 25
 4 0 4 6928.25 562.158 5
 4 0 5 507.108 181.177 5
 -4 0 -5 552.36 170.219 28
 -4 0 -5 157.282 103.542 25
 4 0 5 365.711 72.7098 24
 4 0 5 325.947 64.9114 23
 -4 0 -5 302.316 68.0723 12
 4 0 5 426.651 158.919 2
 4 0 5 520.533 88.7993 38
 4 0 5 254.489 67.9496 20
 4 0 5 442.143 76.5685 37
 4 0 6 1090.42 268.484 5
 4 0 6 1052.9 121.783 24
 4 0 6 979.363 121.627 23
 -4 0 -6 1139.26 124.452 12
 4 0 6 928.384 234.781 2
 4 0 6 1232.85 133.174 38
 4 0 6 1075.35 134.151 20
 4 0 6 1042.24 114.393 37
 4 0 7 -15.428 59.8427 24
 4 0 7 42.8425 49.3009 23
 -4 0 -7 -30.9612 48.7932 12
 4 0 7 33.2774 53.8988 38
 4 0 7 95.3585 46.7511 37
 4 0 7 67.2427 64.2164 20
 4 0 8 996.59 120.839 24
 4 0 8 1059.38 133.207 23
 -4 0 -8 1012.22 117.621 12
 4 0 8 882.195 118.443 20
 4 0 8 906.992 117.686 38
 4 0 8 964.549 109.582 37
 4 0 9 0.23417 53.0177 20
 -4 0 -9 25.8173 42.1506 12
 4 0 9 -106.732 58.9613 38
 -4 0 -9 27.2162 53.7699 34
 4 0 9 24.564 40.2544 37
 4 0 10 5.97774 37.0633 38
 -4 0 -10 39.3929 37.2996 12
 4 0 10 -31.7111 33.828 20
 4 0 10 101.131 28.7753 37
 -4 0 -10 43.9363 41.1862 34
 -4 -1 14 54.3227 22.8047 24
 4 1 -14 16.3255 24.8827 13
 4 1 -14 4.38065 23.9144 39
 -4 -1 14 19.3839 27.9656 38
 -4 -1 14 -11.0887 40.7979 37
 4 1 -14 68.9937 30.2554 35
 -4 -1 13 283.797 58.0071 24
 4 1 -13 354.372 69.6472 13
 4 1 -13 402.285 71.965 39
 -4 -1 13 273.386 69.8486 38
 4 1 -13 405.154 71.7453 35
 -4 -1 13 426.969 81.5985 37
 4 1 -13 448.157 82.3954 10
 -4 -1 12 7456.41 288.723 24
 -4 -1 12 7535.18 299.702 38
 4 1 -12 7206.04 286.542 39
 -4 -1 12 7348.01 301.581 37
 4 1 -12 7304.25 304.803 10
 4 1 -12 7387.67 285.818 35
 4 1 -11 -40.4385 36.1168 35
 -4 -1 11 60.2349 51.323 24
 4 1 -11 -33.4288 39.6744 39
 4 1 -11 32.7057 52.0637 36
 4 1 -11 19.4329 58.9846 10
 -4 -1 11 90.0926 59.3218 38
 4 1 -10 2532.81 182.856 15
 -4 -1 10 2609.61 183.113 24
 4 1 -10 2472.29 185.8 36
 -4 -1 10 2471.99 383.257 1
 4 1 -10 2475.85 175.68 39
 -4 -1 10 2378.66 178.454 38
 4 1 -10 2575.84 192.233 10
 4 1 -10 2542.51 175.574 35
 -4 -1 9 3459.03 421.074 30
 -4 -1 9 3093.78 191.634 24
 -4 -1 9 2751.9 398.569 1
 4 1 -9 3209.56 193.116 39
 4 1 -9 3606.6 215.642 36
 4 1 -9 3213.02 189.347 35
 4 1 -9 2726.77 392.618 6
 4 1 -9 3137.84 202.332 10
 -4 -1 8 2886.99 386.039 30
 -4 -1 8 2141.21 322.591 1
 4 1 -8 2510.6 354.342 6
 -4 -1 7 978.395 240.231 30
 -4 -1 7 488.029 160.088 1
 4 1 -7 721.939 181.365 6
 4 1 -6 636.785 156.901 31
 -4 -1 6 499.384 181.03 30
 -4 -1 6 303.56 128.745 1
 4 1 -6 601.954 175.497 6
 4 1 -5 3275.64 325.615 31
 -4 -1 5 3145.2 347.674 30
 -4 -1 5 2930.54 309.258 1
 4 1 -5 3419.39 343.545 6
 -4 -1 4 13406.7 654.635 30
 -4 -1 4 11613.1 549.831 1
 4 1 -4 12472.3 597.525 6
 4 1 -4 13448.7 626.648 31
 -4 -1 3 8959.06 512.834 30
 -4 -1 3 8992.64 454.947 1
 4 1 -3 8985.41 496.356 6
 4 1 -3 9160.44 520.478 31
 4 1 -3 9895.49 448.109 5
 4 1 -2 16605 703.434 31
 -4 -1 2 15861.7 654.25 30
 -4 -1 2 16958.5 575.296 1
 4 1 -2 15849.9 652.283 6
 4 1 -2 16905.6 622.121 5
 4 1 -1 7494.76 474.763 31
 -4 -1 1 7158.36 420.243 30
 4 1 -1 6859.42 450.631 6
 -4 -1 1 7805.18 365.733 1
 4 1 0 9884.42 549.477 31
 -4 -1 0 10484.6 480.84 30
 4 1 0 10605.4 564.572 5
 4 1 1 28314.9 769.207 2
 -4 -1 -1 26904.5 948.126 28
 4 1 1 26219.1 896.89 31
 4 1 1 26551 951.167 5
 4 1 2 2209.43 259.164 2
 -4 -1 -2 2055.76 307.202 28
 4 1 2 2303.63 307.864 5
 4 1 3 11174 629.862 2
 -4 -1 -3 9923.04 655.432 28
 4 1 3 10552.1 695.264 5
 4 1 4 -4.88368 90.2231 5
 -4 -1 -4 -161.702 94.3456 25
 4 1 4 91.9307 93.3993 2
 4 1 4 -150.271 59.702 20
 4 1 5 4204.2 453.285 2
 -4 -1 -5 3321 440.731 28
 4 1 5 3974.39 217.962 14
 -4 -1 -5 4148.98 466.363 25
 4 1 5 4368.59 233.791 24
 4 1 5 4270.02 235.256 23
 -4 -1 -5 3839.81 210.976 12
 4 1 5 3804.81 224.199 38
 4 1 5 4228.91 240.038 20
 4 1 5 3961.61 214.742 37
 4 1 5 3834.99 478.506 5
 4 1 6 4777.16 242.091 14
 4 1 6 4636.38 246.343 24
 4 1 6 4395.56 246.47 23
 -4 -1 -6 4731.24 238.943 12
 4 1 6 4676.63 235.462 37
 4 1 6 4708.94 253.384 38
 4 1 6 4254.36 245.653 20
 4 1 7 1487.98 135.265 14
 4 1 7 1615.08 146.565 24
 4 1 7 1538.1 150.104 23
 -4 -1 -7 1534.67 140.144 12
 4 1 7 1642.24 154.674 38
 4 1 7 1768.24 164.304 20
 4 1 7 1859.26 144.492 37
 4 1 8 365.861 81.4763 23
 -4 -1 -8 300.744 69.2597 12
 4 1 8 347.472 79.5047 38
 4 1 8 306.563 81.6701 20
 -4 -1 -9 27.7969 50.5575 34
 4 1 9 32.662 47.4528 38
 -4 -1 -9 -1.96421 31.2738 12
 4 1 9 -28.3714 46.1342 20
 -4 -1 -10 36.9018 22.0737 12
 4 1 10 34.4888 26.1614 38
 4 1 10 -51.1004 24.7204 20
 -4 -1 -10 44.1665 30.6635 34
 4 2 -14 30.2687 37.5471 13
 4 2 -14 36.5465 27.7674 39
 -4 -2 14 -15.1364 28.3614 38
 -4 -2 14 -1.5048 33.1877 37
 4 2 -14 47.4533 30.1396 35
 -4 -2 13 536.402 68.1606 24
 4 2 -13 545.739 85.0743 13
 4 2 -13 551.701 80.0145 39
 -4 -2 13 542.361 77.3502 38
 -4 -2 13 593.285 89.9962 37
 4 2 -13 533.025 77.8433 35
 4 2 -13 396.012 82.1457 10
 -4 -2 12 2822.77 169.743 24
 4 2 -12 2668.55 173.878 39
 -4 -2 12 2685.61 180.64 38
 -4 -2 12 2680.32 189.074 37
 4 2 -12 2772.62 193.512 10
 4 2 -12 2613.26 172.668 35
 -4 -2 11 77.7273 39.4447 24
 4 2 -11 -96.6124 44.1927 39
 -4 -2 11 -34.8908 61.9294 38
 4 2 -11 155.566 52.3525 35
 4 2 -11 117.022 66.2957 36
 4 2 -11 -15.1954 60.0292 10
 4 2 -10 4303.41 237.689 15
 4 2 -10 4229.26 221.971 39
 -4 -2 10 3872.7 221.581 38
 4 2 -10 4019.07 235.35 36
 4 2 -10 4073.6 220.643 35
 4 2 -10 4012.16 234.719 10
 -4 -2 9 3514.47 434.032 30
 4 2 -9 3584.51 214.887 15
 -4 -2 9 2801.03 378.709 1
 4 2 -9 3705.46 448.403 6
 4 2 -9 3490.11 212.354 36
 4 2 -9 3390.81 209.892 10
 -4 -2 8 1326.63 243.557 1
 -4 -2 8 1831.55 310.214 30
 4 2 -8 1350.3 268.636 6
 -4 -2 7 1617.13 271.291 1
 -4 -2 7 1964.89 304.32 30
 4 2 -7 2033.25 315.211 6
 -4 -2 6 35097.9 1190.48 30
 -4 -2 6 39143.5 1184.29 1
 4 2 -6 37380.7 1198.75 6
 -4 -2 5 1732.98 283.497 30
 -4 -2 5 1595.85 230.414 1
 4 2 -5 1442.98 249.635 6
 -4 -2 4 68249.9 1516.39 30
 -4 -2 4 69918.3 1352.83 1
 4 2 -4 68017.1 1495.7 6
 4 2 -4 71881.9 1365.7 5
 -4 -2 3 12121.3 617.038 30
 -4 -2 3 13158.2 539.859 1
 4 2 -3 11479.3 610.26 6
 4 2 -3 12325.4 644.439 31
 4 2 -3 12367.1 583.311 5
 4 2 -2 69854.9 1532.69 31
 -4 -2 2 69585.2 1412.18 30
 4 2 -2 69328.5 1491.01 6
 4 2 -2 67584.9 1413.55 5
 -4 -2 1 3876.76 320.787 30
 4 2 -1 3003.07 332.069 6
 4 2 -1 3724.07 351.849 5
 4 2 0 1494.17 238.024 5
 -4 -2 0 1482.4 241.993 28
 -4 -2 -1 5377.79 445.866 28
 4 2 1 5538.18 476.394 5
 4 2 2 93.903 113.662 5
 -4 -2 -2 -48.1061 70.9032 28
 -4 -2 -3 7115.01 571.162 28
 -4 -2 -3 7164.44 598.589 25
 4 2 3 7597.35 625.593 5
 -4 -2 -4 37.5025 63.2208 28
 4 2 4 34.5985 26.3011 23
 4 2 4 31.8731 20.821 21
 4 2 4 48.3274 44.0363 38
 4 2 4 53.8174 62.4476 20
 4 2 5 0.60725 43.3803 14
 4 2 5 45.7834 33.1299 24
 4 2 5 72.1609 48.101 23
 4 2 5 -25.6703 26.6821 21
 4 2 5 -74.9298 56.0198 38
 4 2 5 72.0537 51.4457 20
 4 2 6 2816.71 196.167 38
 4 2 6 2807.93 191.574 14
 4 2 6 3041.03 201.091 23
 -4 -2 -6 3215.99 191.162 12
 4 2 6 3081.3 191.911 21
 4 2 6 3004.27 210.608 20
 4 2 7 1887.38 146.353 14
 4 2 7 1617.38 142.736 38
 4 2 7 1791.88 149.889 23
 -4 -2 -7 1759.47 136.345 12
 4 2 7 1868.09 140.333 21
 4 2 7 1769.49 158.052 20
 4 2 8 32.6121 37.9683 14
 4 2 8 33.635 40.023 23
 -4 -2 -8 94.2195 41.2781 12
 4 2 8 29.2865 40.5631 38
 4 2 8 61.5557 54.8703 20
 -4 -2 -9 53.9355 26.1458 12
 4 2 9 42.0252 34.3443 38
 4 2 9 21.4256 34.2965 20
 -4 -2 -9 0.15115 39.6721 34
 4 3 -14 91.6087 37.6587 16
 4 3 -14 38.3055 37.8647 13
 -4 -3 14 9.08258 23.8189 38
 4 3 -14 36.5533 21.5373 39
 -4 -3 14 78.7616 34.4934 37
 4 3 -14 23.442 26.1631 35
 4 3 -13 2861.32 173.94 13
 4 3 -13 2734.17 148.978 39
 -4 -3 13 2732 154.363 38
 -4 -3 13 2533.96 160.331 37
 4 3 -13 2630.83 169.653 10
 4 3 -13 2888.7 156.501 35
 4 3 -12 3528.96 214.443 13
 4 3 -12 4015.73 201.257 39
 -4 -3 12 3951.64 208.542 38
 -4 -3 12 3749.94 214.1 37
 4 3 -12 3932.13 204.51 35
 4 3 -12 3915.29 223.853 10
 4 3 -11 725.493 96.8235 15
 4 3 -11 899.309 104.116 39
 -4 -3 11 734.705 102.315 38
 4 3 -11 797.679 110.896 10
 4 3 -11 763.237 96.3504 35
 4 3 -10 283.454 69.4187 15
 -4 -3 10 158.513 57.9708 38
 4 3 -10 79.5679 40.6432 35
 4 3 -10 168.175 70.7426 36
 4 3 -10 233.904 70.3115 10
 -4 -3 9 825.75 221.22 30
 4 3 -9 570.708 98.3423 15
 4 3 -9 592.069 98.224 36
 -4 -3 9 579.916 171.429 1
 4 3 -9 863.139 238.466 6
 4 3 -9 606.085 92.8416 10
 4 3 -8 42.3172 38.5995 15
 -4 -3 8 156.302 92.4403 1
 4 3 -8 58.8923 27.2562 7
 4 3 -8 -45.0778 37.1222 36
 4 3 -8 169.66 119.637 6
 4 3 -8 51.4327 42.2303 10
 -4 -3 7 405.913 186.777 30
 -4 -3 7 263.59 110.589 1
 4 3 -7 134.05 109.302 6
 -4 -3 6 1831.97 258.105 1
 -4 -3 6 1294.37 265.769 30
 4 3 -6 2333.66 326.007 6
 4 3 -5 589.549 173.794 6
 -4 -3 5 342.272 179.302 30
 -4 -3 5 593.436 137.822 1
 -4 -3 4 105213 1968.33 30
 4 3 -4 104558 2008.12 6
 4 3 -4 109919 1901.4 5
 -4 -3 3 41291.2 1196.95 30
 4 3 -3 38947.1 1215.44 6
 4 3 -3 37939.5 1142.99 5
 -4 -3 2 2717.22 297.153 30
 4 3 -2 2302.07 315.396 6
 4 3 -2 2357.62 297.967 5
 -4 -3 1 11603.3 579.449 30
 -4 -3 1 10723.5 584.771 28
 4 3 -1 10130.3 626.896 5
 4 3 0 49.2918 97.7782 5
 -4 -3 0 239.135 108.97 28
 -4 -3 -1 13535.2 722.983 28
 4 3 1 14257.1 826.794 5
 4 3 2 -207.507 122.855 5
 -4 -3 -2 -1.03587 87.3153 28
 -4 -3 -2 84.8438 106.658 25
 4 3 2 46.6528 52.4466 14
 -4 -3 -3 21056 1009.78 28
 4 3 3 21208.2 518.788 14
 -4 -3 -3 20470.4 1036.66 25
 4 3 3 21454.6 514.863 21
 4 3 3 20384.2 509.286 20
 4 3 3 21121.7 1102.23 5
 4 3 3 21445.9 499.815 38
 4 3 4 597.42 103.798 14
 4 3 4 751.354 94.47 23
 4 3 4 499.917 89.7288 21
 4 3 4 437.08 82.4126 38
 4 3 4 501.555 102.839 20
 4 3 5 2493.4 187.555 14
 4 3 5 2815.25 186.292 23
 4 3 5 2844.99 192.161 21
 4 3 5 2549.01 193.126 20
 4 3 5 2666.84 182.532 38
 4 3 6 1656.47 147.617 14
 4 3 6 1867.29 150.379 23
 4 3 6 1634.92 141.106 21
 4 3 6 1738.47 144.714 38
 4 3 6 1663.86 156.003 20
 4 3 7 -34.8708 51.1811 14
 4 3 7 -24.3202 61.4226 20
 4 3 7 -46.3004 40.0481 23
 4 3 7 -3.52967 41.1068 21
 4 3 7 24.4124 36.6339 38
 4 3 8 -57.0961 31.3971 14
 4 3 8 24.0818 38.9439 20
 4 3 8 27.6067 29.4321 38
 -4 -3 -9 6.47362 20.6424 34
 4 4 -14 31.5564 30.0113 16
 4 4 -14 -9.71111 38.0786 13
 -4 -4 14 12.3904 25.5184 37
 4 4 -14 -0.87509 16.517 35
 4 4 -13 427.078 72.9096 16
 4 4 -13 496.723 87.0257 13
 -4 -4 13 416.461 57.3465 38
 -4 -4 13 416.244 67.9182 37
 4 4 -13 471.408 63.7788 35
 4 4 -13 368.981 69.1896 10
 4 4 -12 615.711 93.2205 16
 4 4 -12 632.95 104.757 13
 -4 -4 12 652.066 81.9925 38
 -4 -4 12 543.41 88.2632 37
 4 4 -12 706.559 102.223 10
 4 4 -12 599.372 81.3048 35
 4 4 -11 282.829 73.4171 15
 4 4 -11 395.079 86.2488 13
 -4 -4 11 348.121 72.9458 38
 4 4 -11 460.286 75.6286 35
 4 4 -11 308.289 71.276 10
 4 4 -10 70.8076 42.2663 15
 -4 -4 10 47.3921 46.1315 38
 4 4 -10 33.877 39.9657 10
 -4 -4 9 1902.48 326.586 30
 4 4 -9 1725.13 157.367 15
 -4 -4 9 1198.27 263.578 1
 4 4 -9 1723.04 327.306 6
 4 4 -9 1614.81 146.166 10
 -4 -4 8 889.099 225.884 30
 4 4 -8 1338.69 133.479 16
 4 4 -8 1350.36 141.197 15
 4 4 -8 1334.98 137.167 36
 -4 -4 8 775.896 188.685 1
 4 4 -8 1153.1 124.887 10
 4 4 -8 612.489 180.154 6
 -4 -4 7 3976.1 462.598 30
 -4 -4 7 4159.22 430.035 1
 4 4 -7 4568.95 242.242 15
 4 4 -7 3785.49 450.459 6
 4 4 -7 4279.24 225.59 36
 -4 -4 6 755.827 175.037 1
 4 4 -6 355.57 166.333 6
 -4 -4 6 316.26 143.323 30
 -4 -4 5 -46.1998 89.0446 30
 4 4 -5 404.065 179.082 6
 -4 -4 4 7236.94 559.643 30
 4 4 -4 7043.89 574.506 6
 4 4 -4 7114.91 546.554 5
 -4 -4 3 3729.09 380.201 30
 4 4 -3 3896.81 425.501 6
 4 4 -3 3822.05 416.446 5
 4 4 -2 5662.53 506.967 5
 -4 -4 2 7001.85 505.522 30
 -4 -4 2 7224.74 477.619 28
 4 4 -2 6452.57 555.117 6
 -4 -4 1 1792.67 256.305 28
 4 4 -1 1176.33 253.428 5
 4 4 0 443.436 148.139 5
 -4 -4 0 404.891 132.157 28
 -4 -4 0 229.8 159.769 25
 4 4 1 1768.72 304.941 5
 -4 -4 -1 1193.64 222.715 28
 4 4 1 1657.62 148.989 8
 4 4 1 1718.45 149.266 14
 -4 -4 -1 1233.84 265.529 25
 4 4 1 1562 139.679 22
 4 4 1 1728.46 153.886 21
 4 4 1 1792.42 154.076 11
 4 4 1 1675.79 143.796 20
 4 4 2 1874.24 344.402 5
 -4 -4 -2 1674.91 275.134 28
 4 4 2 1482.71 137.141 8
 4 4 2 1843.89 156.171 14
 -4 -4 -2 2217.04 334.351 25
 4 4 2 1792.63 158.063 21
 4 4 2 2042.76 172.808 11
 4 4 2 1831.38 160.609 20
 4 4 3 1177.24 137.708 14
 4 4 3 1032.03 124.584 21
 4 4 3 1155.29 133.951 20
 4 4 3 1333.32 129.567 38
 4 4 4 115.532 66.8423 14
 4 4 4 106.041 66.6089 21
 4 4 4 201.785 61.2892 38
 4 4 4 91.1892 68.3846 20
 4 4 5 -0.85591 53.11 14
 4 4 5 79.3554 39.9626 23
 4 4 5 22.7469 47.1514 21
 4 4 5 -16.4116 39.2021 38
 4 4 5 17.7738 64.2764 20
 4 4 6 27.9434 51.8445 14
 4 4 6 -8.0009 30.7305 23
 4 4 6 31.0603 50.2313 21
 4 4 6 68.8493 38.5137 38
 4 4 6 95.0267 68.0738 20
 4 4 7 407.361 66.4268 14
 4 4 7 377.369 56.8097 21
 4 4 7 372.796 69.4192 20
 -4 -4 -8 208.711 38.8412 34
 4 4 8 174.151 38.0433 20
 4 5 -14 115.663 34.3027 16
 4 5 -14 132.724 40.5631 13
 4 5 -13 164.337 55.4163 16
 4 5 -13 187.054 60.7438 13
 -4 -5 13 115.437 32.5219 37
 4 5 -13 91.095 32.5198 35
 4 5 -12 8.72856 43.4407 16
 4 5 -12 37.4925 44.5594 15
 4 5 -12 43.1568 51.9674 13
 -4 -5 12 26.5134 27.3962 37
 4 5 -12 42.8372 35.9938 35
 4 5 -12 51.7417 43.2927 10
 4 5 -11 464.414 85.4844 16
 4 5 -11 452.164 84.4653 15
 4 5 -11 463.796 88.366 13
 -4 -5 11 428.838 72.341 37
 4 5 -11 463.222 79.7597 10
 4 5 -10 2332.53 177.961 16
 4 5 -10 2372.97 183.87 15
 4 5 -10 2152.94 172.947 13
 4 5 -10 2294.61 172.196 10
 4 5 -9 902.813 111.816 16
 4 5 -9 602.38 104.279 15
 4 5 -9 635.864 100.628 13
 4 5 -9 892.367 113.227 10
 -4 -5 8 120.67 113.297 30
 4 5 -8 65.7691 41.6202 16
 4 5 -8 -37.2592 55.2515 15
 4 5 -8 104.447 44.5809 13
 4 5 -8 137.684 103.593 6
 4 5 -8 74.0382 30.9997 10
 -4 -5 7 -70.53 141.46 30
 4 5 -7 -17.2115 38.0521 16
 4 5 -7 12.4929 61.3657 15
 4 5 -7 99.2389 49.6541 22
 4 5 -7 90.1933 61.2756 21
 -4 -5 6 6554.5 588.586 30
 4 5 -6 6529.07 277.249 16
 4 5 -6 6670.3 297.596 15
 4 5 -6 6311.45 275.184 8
 4 5 -6 6593.54 290.712 22
 4 5 -6 6306.02 284.034 21
 4 5 -6 6914.39 613.93 6
 4 5 -5 54.8978 30.2306 15
 4 5 -5 -41.7489 44.2032 8
 4 5 -5 8.12613 37.2144 22
 4 5 -5 6.28487 41.7999 21
 -4 -5 4 14059.5 818.261 30
 4 5 -4 14302.8 417.548 8
 4 5 -4 14244.9 419.721 22
 4 5 -4 14717.1 426.702 21
 4 5 -4 14428.6 867.609 6
 -4 -5 3 10275.7 676.663 30
 4 5 -3 9177.96 338.085 8
 -4 -5 3 9735.04 680.305 25
 4 5 -3 9100.17 334.85 22
 4 5 -3 8863.26 682.289 6
 4 5 -3 9350.19 342.484 21
 4 5 -3 9259.67 681.889 5
 4 5 -2 11162.9 375.836 8
 4 5 -2 10950.8 363.89 14
 -4 -5 2 10570.4 730.003 25
 4 5 -2 10459.7 361.427 22
 4 5 -2 10554.5 368.438 21
 4 5 -2 10589.4 741.326 5
 4 5 -2 10128.7 340.022 11
 4 5 -1 13241.8 837.848 5
 4 5 -1 12644.9 384.262 16
 4 5 -1 13626.1 418.437 8
 4 5 -1 13306.2 410.629 14
 -4 -5 1 13146.1 836.447 25
 4 5 -1 13542.6 414.306 22
 4 5 -1 14028.8 428.676 21
 4 5 -1 12691.1 390.948 11
 4 5 0 3629.26 213.849 16
 4 5 0 3690.78 224.218 8
 4 5 0 3664.42 222.034 14
 -4 -5 0 3460.46 431.532 25
 4 5 0 4027.97 229.65 22
 4 5 0 3880.38 232.24 21
 4 5 0 3490.79 215.625 11
 4 5 0 3466.57 468.81 5
 4 5 1 2629.12 182.607 16
 4 5 1 2583.25 190.361 8
 4 5 1 2450.45 187 14
 -4 -5 -1 2457.87 381.693 25
 4 5 1 2609.89 178.621 22
 4 5 1 2542.12 193.649 21
 4 5 1 2574.28 191.342 11
 4 5 1 2432.36 178.126 20
 4 5 2 978.934 119.581 8
 4 5 2 1082.52 129.759 14
 4 5 2 952.152 127.071 21
 4 5 2 1041.5 136.696 11
 4 5 2 1113 124.925 20
 4 5 3 828.944 119.045 14
 4 5 3 739.993 110.696 21
 4 5 3 918.127 116.846 20
 4 5 4 153.884 73.2213 14
 4 5 4 224.192 80.8361 20
 4 5 4 124.739 64.5313 21
 4 5 5 168.242 67.7396 14
 4 5 5 160.613 59.5296 21
 4 5 5 218.341 70.883 20
 4 5 6 991.236 95.8962 14
 4 5 6 1102.04 95.4659 21
 4 5 6 1039.31 101.793 20
 4 5 7 75.4689 27.1767 14
 4 5 7 117.361 33.922 20
 4 6 -14 17.7538 23.4679 13
 4 6 -13 130.62 46.5425 16
 4 6 -13 152.573 51.858 13
 4 6 -12 46.4041 46.1611 16
 4 6 -12 -19.3586 40.1724 15
 4 6 -12 94.2883 51.7912 13
 4 6 -12 31.3206 23.1905 10
 4 6 -11 369.221 82.9775 16
 4 6 -11 273.895 71.5897 15
 4 6 -11 412.525 76.1347 13
 4 6 -11 462.826 70.2197 10
 4 6 -10 873.553 107.482 16
 4 6 -10 928.763 120.615 15
 4 6 -10 855.235 108.462 13
 4 6 -9 15.609 47.9956 16
 4 6 -9 36.5183 64.8875 15
 4 6 -9 54.9087 34.5081 13
 4 6 -8 -102.289 54.3581 16
 4 6 -8 -34.7079 71.1362 15
 4 6 -8 24.0675 25.945 13
 4 6 -7 4812.23 252.807 16
 4 6 -7 4491.89 258.181 15
 4 6 -7 5077.57 263.555 22
 4 6 -7 4534.28 250.14 21
 4 6 -6 1923.71 159.019 16
 4 6 -6 1777.17 163.775 15
 4 6 -6 1863.7 161.679 8
 4 6 -6 1898.16 166.269 22
 4 6 -6 1921.72 166.653 21
 4 6 -6 1858.96 325.923 6
 -4 -6 5 3132.65 426.866 30
 4 6 -5 3370.1 218.481 15
 4 6 -5 3312.09 213.413 8
 4 6 -5 3241.42 213.13 22
 4 6 -5 3167.62 210.666 21
 4 6 -5 3402.81 209.843 16
 4 6 -5 2890.96 430.824 6
 4 6 -4 2663.68 191.313 16
 -4 -6 4 2082.92 338.159 30
 4 6 -4 2666.01 193.779 15
 4 6 -4 2244.29 183.969 8
 4 6 -4 2456.37 176.711 14
 4 6 -4 2422.81 189 22
 4 6 -4 2248.12 180.908 21
 4 6 -4 2470.58 175.649 11
 4 6 -4 3022.27 425.654 6
 4 6 -3 2524.04 182.975 16
 4 6 -3 2719.47 190.161 15
 4 6 -3 2470.2 189.37 8
 4 6 -3 2801.14 188.669 14
 4 6 -3 2357.44 182.142 22
 4 6 -3 2734.74 196.15 21
 4 6 -3 2577.33 179.715 11
 4 6 -2 -199.667 67.584 16
 4 6 -2 -26.517 68.2548 8
 4 6 -2 -3.38874 23.9403 14
 4 6 -2 -97.6852 46.4223 22
 4 6 -2 46.7013 52.0976 21
 4 6 -2 -1.49454 61.708 11
 4 6 -2 187.882 158.716 5
 4 6 -1 3951.31 230.472 16
 4 6 -1 4141.15 241.096 8
 4 6 -1 4170.08 236.905 14
 4 6 -1 4171.38 238.878 22
 4 6 -1 3767.87 234.2 21
 4 6 -1 3827.06 229.823 11
 4 6 0 1042.97 122.436 16
 4 6 0 985.73 127.195 8
 4 6 0 951.054 120.53 14
 4 6 0 998.149 121.954 22
 4 6 0 911.498 122.916 21
 4 6 0 1046.03 135.189 11
 4 6 1 221.31 79.638 8
 4 6 1 289.182 77.3437 14
 4 6 1 375.728 74.8367 22
 4 6 1 327.831 88.4729 21
 4 6 1 394.651 82.5846 20
 4 6 1 475.317 104.561 11
 4 6 2 719.426 101.473 8
 4 6 2 620.143 100.854 14
 4 6 2 662.482 110.394 21
 4 6 2 653.443 96.1093 20
 4 6 3 16.4025 56.0827 14
 4 6 3 26.5541 58.3691 21
 4 6 3 49.2433 57.9514 20
 4 6 4 53.2376 56.0566 14
 4 6 4 106.809 57.8124 21
 4 6 4 108.248 57.1747 20
 4 6 5 221.291 57.726 14
 4 6 5 79.3582 39.9878 21
 4 6 5 219.816 57.506 20
 4 6 6 283.603 41.7006 14
 4 6 6 184.062 31.5528 21
 4 6 6 273.085 41.678 20
 4 7 -13 1320.17 85.8326 16
 4 7 -13 1405.39 87.8486 13
 4 7 -12 624.752 77.9475 16
 4 7 -12 563.793 67.1584 15
 4 7 -12 620.606 76.4936 13
 4 7 -11 48.3406 49.6669 16
 4 7 -11 -20.7067 50.4706 15
 4 7 -11 -33.5816 44.5501 13
 4 7 -10 326.917 77.5596 16
 4 7 -10 369.304 87.0913 15
 4 7 -10 377.062 72.8637 13
 4 7 -9 177.982 60.146 16
 4 7 -9 295.329 89.6785 15
 4 7 -9 444.337 69.9947 13
 4 7 -8 144.561 62.4924 16
 4 7 -8 226.367 88.4502 15
 4 7 -8 349.383 84.184 22
 4 7 -7 4312.69 238.924 16
 4 7 -7 4371.06 251.711 15
 4 7 -7 4524.02 236.363 8
 4 7 -7 4531.75 253.991 22
 4 7 -7 4268.06 243.539 21
 4 7 -6 -117.064 60.9331 16
 4 7 -6 -49.215 48.2644 15
 4 7 -6 -39.2202 67.888 8
 4 7 -6 22.7284 69.2473 22
 4 7 -6 1.26378 62.4418 21
 4 7 -6 -252.249 63.9381 11
 4 7 -5 1011.7 124.829 16
 4 7 -5 1080.97 131.602 15
 4 7 -5 1065.56 133.236 8
 4 7 -5 935.503 131.831 22
 4 7 -5 1002.38 129.451 21
 4 7 -5 1089.97 125.136 11
 4 7 -4 32.6002 60.452 16
 4 7 -4 148.637 68.0848 15
 4 7 -4 166.286 58.6351 14
 4 7 -4 -69.8482 93.1496 8
 4 7 -4 48.4661 59.3424 22
 4 7 -4 -182.878 83.3533 21
 4 7 -4 66.3882 48.8451 11
 4 7 -3 1583.04 155.946 16
 4 7 -3 1582.65 145.84 15
 4 7 -3 1430.23 158.699 8
 4 7 -3 1727.66 150.539 14
 4 7 -3 1491.45 153.438 22
 4 7 -3 1477.26 148.38 21
 4 7 -3 1557.67 149.487 11
 4 7 -2 297.552 86.3677 16
 4 7 -2 264.422 96.3016 8
 4 7 -2 320.046 69.3434 14
 4 7 -2 287.27 81.144 22
 4 7 -2 229.921 74.4663 21
 4 7 -2 216.615 81.3451 11
 4 7 -1 20.4235 66.4417 16
 4 7 -1 56.5579 76.8938 8
 4 7 -1 -0.29524 39.4563 14
 4 7 -1 59.7524 59.4581 22
 4 7 -1 98.0006 76.6988 21
 4 7 -1 -44.4539 72.0994 11
 4 7 0 -51.6443 73.601 8
 4 7 0 -17.5094 37.1449 14
 4 7 0 24.6742 46.4431 22
 4 7 0 28.5269 58.3697 21
 4 7 0 91.2879 79.7815 11
 4 7 1 57.044 58.2683 8
 4 7 1 99.9853 65.2205 14
 4 7 1 48.0378 70.4085 21
 4 7 1 100.558 54.6339 20
 4 7 1 210.926 99.7767 11
 4 7 2 211.054 59.79 8
 4 7 2 203.402 66.7275 14
 4 7 2 247.568 78.4258 21
 4 7 2 170.362 54.4424 20
 4 7 3 30.139 47.3314 14
 4 7 3 21.8282 52.2186 21
 4 7 3 1.65064 42.5051 20
 4 7 4 126.158 44.4426 14
 4 7 4 136.796 46.5518 21
 4 7 4 46.4536 32.843 20
 4 8 -12 20.9514 21.457 15
 4 8 -12 11.9104 14.7096 13
 4 8 -11 5.22434 38.5984 16
 4 8 -11 53.8763 29.4891 13
 4 8 -10 393.902 72.0247 16
 4 8 -10 347.174 75.689 15
 4 8 -9 37.7178 53.165 16
 4 8 -9 31.5071 66.4265 15
 4 8 -8 1459.54 138.307 16
 4 8 -8 1331.44 146.82 15
 4 8 -7 51.4461 61.0188 16
 4 8 -7 81.4108 75.5937 15
 4 8 -7 167.479 48.7452 11
 4 8 -7 120.805 59.8466 8
 4 8 -7 164.623 78.204 22
 4 8 -6 1881.77 167.322 15
 4 8 -6 1918.23 163.959 8
 4 8 -6 1729.08 165.066 22
 4 8 -6 1789.47 157.973 21
 4 8 -6 1896.93 150.143 11
 4 8 -6 1631.54 149.363 16
 4 8 -5 146.103 68.763 16
 4 8 -5 215.479 79.402 15
 4 8 -5 110.871 75.871 8
 4 8 -5 145.56 78.0149 22
 4 8 -5 228.46 84.0182 21
 4 8 -5 149.425 59.4049 11
 4 8 -4 605.125 99.6224 16
 4 8 -4 716.321 109.433 15
 4 8 -4 604.37 119.813 8
 4 8 -4 589.552 111.247 22
 4 8 -4 678.713 105.481 21
 4 8 -4 505.668 96.5788 11
 4 8 -3 1245.59 136.245 16
 4 8 -3 1451.97 134.636 15
 4 8 -3 1377.57 152.461 8
 4 8 -3 1394.63 122.611 14
 4 8 -3 1278.58 136.118 11
 4 8 -3 1510.24 148.87 22
 4 8 -3 1185.48 134.545 21
 4 8 -2 925.155 116.837 16
 4 8 -2 808.782 98.3972 14
 4 8 -2 855.958 126.691 8
 4 8 -2 827.554 113.979 22
 4 8 -2 862.171 117.476 21
 4 8 -2 786.175 115.087 11
 4 8 -1 1131.49 122.206 16
 4 8 -1 983.762 127.163 8
 4 8 -1 1000.04 108.205 14
 4 8 -1 1027.4 113.948 22
 4 8 -1 904.586 121.819 21
 4 8 -1 1018.83 127.456 11
 4 8 0 24.0531 62.3489 8
 4 8 0 -122.282 52.0519 14
 4 8 0 95.251 38.7688 22
 4 8 0 -12.1401 68.2015 21
 4 8 0 35.3324 72.3037 11
 4 8 1 16.7648 46.5658 8
 4 8 1 -11.1568 39.0311 14
 4 8 1 -39.1516 58.5907 21
 4 8 2 839.572 81.2035 14
 4 8 2 927.829 92.4333 21
 4 8 2 782.833 65.6888 20
 4 8 3 373.456 46.0133 14
 4 8 3 455.297 55.7297 21
 4 9 -11 1.74835 23.1996 16
 4 9 -11 12.1975 25.3741 15
 4 9 -10 -6.02962 34.8554 16
 4 9 -10 -28.6323 45.9032 15
 4 9 -9 45.5322 42.8966 16
 4 9 -9 13.6268 51.4638 15
 4 9 -8 30.0019 48.8032 16
 4 9 -8 -4.63793 59.1866 15
 4 9 -7 100.599 57.656 16
 4 9 -7 104.268 66.8067 15
 4 9 -7 136.718 49.6747 8
 4 9 -7 70.9842 43.6816 11
 4 9 -6 65.6779 58.6475 16
 4 9 -6 205.327 76.3148 15
 4 9 -6 118.62 61.5885 8
 4 9 -6 194.06 74.5118 22
 4 9 -6 195.511 68.9208 21
 4 9 -6 108.558 52.4034 11
 4 9 -5 4064.83 206.647 16
 4 9 -5 4221.97 212.557 15
 4 9 -5 4253.88 214.487 8
 4 9 -5 4202.91 223.038 22
 4 9 -5 4150.62 208.22 21
 4 9 -5 4017.65 199.037 11
 4 9 -4 5.48209 60.3081 16
 4 9 -4 97.2811 53.3281 15
 4 9 -4 -0.96962 69.137 8
 4 9 -4 32.2996 65.6897 22
 4 9 -4 -20.5956 53.9877 21
 4 9 -4 -39.5282 61.7323 11
 4 9 -3 1160.39 115.077 16
 4 9 -3 1052.39 123.076 8
 4 9 -3 1098.34 115.638 22
 4 9 -3 1073.43 111.787 21
 4 9 -3 1051.87 110.576 11
 4 9 -2 69.5741 64.2228 8
 4 9 -2 136.5 57.6829 22
 4 9 -2 -6.21469 53.8204 21
 4 9 -2 60.5857 58.1201 11
 4 9 -1 1512.73 122.861 8
 4 9 -1 1383.22 90.8224 14
 4 9 -1 1400.09 115.914 21
 4 9 -1 1618.07 123.989 11
 4 9 0 -14.1454 39.7832 8
 4 9 0 8.83235 20.0078 14
 4 9 0 -6.06287 42.3272 21
 4 9 1 10.7605 29.4471 21
 4 10 -9 109.767 34.8404 16
 4 10 -9 194.619 45.5779 15
 4 10 -8 1268.38 89.9371 16
 4 10 -8 1386.53 103.019 15
 4 10 -7 2.6578 40.2441 16
 4 10 -7 48.9492 44.2813 15
 4 10 -6 296.528 57.6687 16
 4 10 -6 369.276 63.1204 15
 4 10 -6 236.009 53.4698 8
 4 10 -6 307.583 48.7708 11
 4 10 -5 57.6475 40.4853 16
 4 10 -5 81.157 49.4103 8
 4 10 -5 84.2927 41.6506 11
 4 10 -4 908.683 82.1122 16
 4 10 -4 972.514 94.6034 8
 4 10 -4 939.859 81.3978 21
 4 10 -4 949.385 81.3047 11
 4 10 -3 50.4106 47.2127 8
 4 10 -3 61.9614 37.856 21
 4 10 -3 71.8301 41.9103 11
 4 10 -2 120.016 44.7347 8
 4 10 -2 157.765 40.1835 21
 4 10 -1 43.8593 24.8294 8
 -5 13 1 197.288 38.6961 8
 -5 13 1 251.336 38.2003 20
 -5 13 0 1871.81 102.059 8
 -5 13 0 1812.93 97.5542 20
 -5 13 -1 693.989 67.889 8
 5 -13 1 513.119 55.9069 36
 -5 13 -2 1678.33 108.436 9
 -5 13 -2 1479.95 89.8673 8
 5 -13 2 1464.72 96.0152 36
 -5 13 -3 1557.19 103.861 9
 5 -13 3 1309.88 94.0029 36
 -5 13 -4 855.423 78.126 9
 5 -13 4 824.187 76.0003 36
 -5 13 -5 -3.84083 30.6836 9
 5 -13 5 10.184 27.9591 36
 -5 13 -6 171.174 31.5952 9
 5 -13 6 277.623 38.476 36
 -5 12 4 994.688 62.8672 20
 -5 12 3 739.985 68.2605 8
 5 -12 -3 538.566 52.4063 39
 -5 12 3 705.198 70.9818 20
 -5 12 3 638.526 62.4254 18
 -5 12 2 136.395 50.3411 8
 5 -12 -2 158.429 35.0432 36
 5 -12 -2 164.091 40.7609 39
 -5 12 2 142.891 50.4955 20
 -5 12 2 190.682 48.4091 18
 -5 12 1 142.09 52.865 8
 -5 12 1 121.613 43.1261 18
 5 -12 -1 120.647 39.6921 36
 -5 12 0 97.3262 57.1561 9
 -5 12 0 67.8014 54.9213 8
 5 -12 0 161.228 50.0331 36
 -5 12 -1 918.881 110.053 9
 -5 12 -1 994.305 105.568 8
 5 -12 1 727.614 94.7 36
 -5 12 -2 734.264 99.2678 9
 -5 12 -2 624.216 84.3535 8
 5 -12 2 672.721 97.0004 36
 -5 12 -2 782.299 101.463 34
 -5 12 -3 418.295 82.308 9
 -5 12 -3 385.699 61.4072 8
 -5 12 -3 460.561 80.8168 34
 5 -12 3 398.042 81.9637 36
 5 -12 3 411.882 63.1306 32
 5 -12 4 494.478 67.8635 32
 -5 12 -4 461.965 81.7208 9
 -5 12 -4 460.282 76.5618 34
 -5 12 -5 109.756 55.5661 9
 5 -12 5 159.674 50.2107 32
 -5 12 -5 217.758 59.0647 34
 -5 12 -6 16.9955 42.9391 9
 -5 12 -6 55.9309 41.3911 34
 5 -12 6 21.6855 33.8094 32
 -5 12 -7 963.909 79.6351 9
 -5 12 -7 851.864 70.662 34
 5 -12 7 860.336 72.1078 36
 5 -12 7 847.79 77.034 32
 -5 12 -8 214.454 34.8132 9
 5 -12 8 263.523 39.1994 32
 -5 11 5 351.067 43.7494 8
 5 -11 -5 354.036 47.3526 39
 -5 11 5 397.47 53.8718 20
 5 -11 -5 302.343 54.7615 35
 -5 11 5 397.334 57.4444 18
 -5 11 5 258.1 41.8565 33
 -5 11 4 17.4746 37.0399 8
 -5 11 4 9.60415 41.7047 20
 5 -11 -4 -4.34039 30.1052 39
 -5 11 4 -23.1203 40.1702 18
 -5 11 4 21.4656 24.4252 33
 -5 11 3 142.73 59.7991 8
 5 -11 -3 127.079 50.4526 39
 -5 11 3 18.5241 28.5075 19
 5 -11 -3 76.0891 33.0652 36
 -5 11 3 97.9646 50.5141 18
 -5 11 3 184.551 47.4428 33
 -5 11 2 9.14375 55.203 8
 5 -11 -2 -100.89 45.9386 36
 -5 11 2 25.7201 33.1175 33
 -5 11 1 9.54282 65.1201 9
 -5 11 1 -19.289 63.4274 8
 5 -11 -1 -6.67794 44.4925 36
 -5 11 0 342.525 87.5424 9
 -5 11 0 344.081 84.6998 8
 5 -11 0 300.368 82.9861 36
 -5 11 0 388.847 87.4427 34
 -5 11 -1 55.7444 63.9352 9
 -5 11 -1 112.974 59.2694 8
 5 -11 1 139.267 78.8018 36
 -5 11 -1 89.9823 66.8999 34
 -5 11 -2 904.217 120.903 9
 5 -11 2 991.542 110.771 32
 -5 11 -2 1117.95 118.097 8
 -5 11 -2 1096.09 130.888 34
 -5 11 -3 6.50667 57.2584 9
 -5 11 -3 -44.4959 36.9522 8
 -5 11 -3 10.1435 53.3688 34
 5 -11 3 5.79537 33.068 17
 5 -11 3 23.8236 49.229 32
 -5 11 -4 1280.2 132.938 9
 5 -11 4 1408.25 136.535 32
 -5 11 -4 1432.26 129.504 12
 -5 11 -4 1527.01 141.706 34
 5 -11 4 1408.05 123.603 17
 -5 11 -5 55.7028 51.4146 9
 -5 11 -5 60.4022 47.085 12
 -5 11 -5 85.6927 59.4897 34
 5 -11 5 15.1266 53.0404 32
 5 -11 5 20.431 36.74 17
 -5 11 -6 1730.38 137.425 9
 5 -11 6 1475.06 128.473 32
 -5 11 -6 1519.04 122.918 12
 -5 11 -6 1720.5 120.622 11
 -5 11 -6 1652.71 131.007 34
 5 -11 6 1622.1 125.957 17
 -5 11 -7 129.485 52.7662 9
 -5 11 -7 55.2278 40.8386 12
 5 -11 7 137.725 53.6286 32
 -5 11 -7 79.7357 41.3611 11
 -5 11 -7 48.912 41.4831 34
 5 -11 7 187.484 47.7589 17
 -5 11 -8 188.573 46.7254 9
 -5 11 -8 269.824 47.9613 12
 -5 11 -8 248.061 44.2172 11
 -5 11 -8 242.097 45.8583 34
 5 -11 8 228.684 40.8214 36
 5 -11 8 314.644 60.4673 32
 5 -11 8 131.824 40.4801 17
 5 -11 9 56.9466 27.7085 32
 -5 11 -9 46.417 23.4556 9
 5 -11 9 49.8784 20.3914 17
 -5 10 7 321.319 47.3163 23
 5 -10 -7 367.773 41.8064 39
 5 -10 -7 268.356 44.333 35
 -5 10 7 375.723 53.2963 18
 -5 10 7 321.614 45.8961 33
 -5 10 6 372.588 61.8673 33
 5 -10 -6 325.575 57.1449 39
 -5 10 6 332.126 55.3365 20
 5 -10 -6 333.035 66.5819 35
 -5 10 6 336.631 65.8391 18
 -5 10 5 26.0376 38.8675 19
 -5 10 5 7.5334 28.9509 8
 5 -10 -5 -40.7728 38.3579 39
 -5 10 5 1.46452 43.9531 20
 -5 10 5 33.1784 50.554 18
 -5 10 5 10.1361 41.3549 33
 -5 10 4 295.054 70.2023 8
 5 -10 -4 347.117 74.9771 39
 5 -10 -4 370.743 68.3098 36
 -5 10 4 307.937 64.8336 19
 -5 10 4 201.578 71.9198 18
 -5 10 4 281.027 69.5358 33
 -5 10 3 873.75 115.017 8
 5 -10 -3 814.889 107.657 36
 -5 10 3 830.218 99.9335 19
 -5 10 3 817.446 100.288 33
 -5 10 2 0.29516 61.2559 9
 5 -10 -2 33.2193 55.0676 36
 -5 10 2 18.0357 32.7628 19
 -5 10 2 -58.8659 45.8114 33
 -5 10 1 1270.45 138.464 9
 5 -10 -1 1201.81 140.823 36
 -5 10 1 1191.69 133.227 34
 -5 10 1 1525.39 130.888 33
 -5 10 1 1298.17 123.037 19
 -5 10 0 680.98 111.404 9
 5 -10 0 684.447 117.131 36
 -5 10 0 716.938 91.942 19
 -5 10 0 570.956 99.3236 34
 5 -10 0 837.271 101.701 17
 -5 10 -1 311.316 88.6233 9
 -5 10 -1 343.222 83.8475 34
 5 -10 1 349.551 79.9089 17
 5 -10 1 404.981 87.7837 32
 -5 10 -2 96.5466 66.1962 9
 5 -10 2 40.812 52.1516 32
 -5 10 -2 34.7844 51.9073 12
 -5 10 -2 52.917 63.7568 34
 5 -10 2 72.146 37.7898 17
 -5 10 -3 104.753 69.2564 9
 -5 10 -3 102.514 56.7659 12
 -5 10 -3 69.1525 61.4831 34
 5 -10 3 70.0659 59.2104 32
 5 -10 3 114.6 51.0768 17
 -5 10 -4 784.315 116.477 9
 -5 10 -4 1095.88 126.509 12
 -5 10 -4 958.158 122.309 34
 5 -10 4 896.676 108.825 17
 5 -10 4 792.022 118.276 32
 -5 10 -5 859.02 111.882 9
 -5 10 -5 1097.21 118.153 12
 5 -10 5 845.687 122.376 32
 -5 10 -5 749.553 109.095 34
 5 -10 5 930.307 112.453 17
 -5 10 -5 976.568 110.891 11
 5 -10 6 452.492 83.5524 17
 -5 10 -6 445.701 87.0169 9
 -5 10 -6 425.997 84.5857 34
 -5 10 -6 356.06 77.7433 12
 -5 10 -6 366.246 73.772 11
 5 -10 6 411.679 93.3966 32
 -5 10 -7 609.94 83.584 9
 -5 10 -7 562.898 80.2637 11
 -5 10 -7 686.549 93.4626 12
 5 -10 7 549.171 84.211 17
 -5 10 -7 649.947 90.8919 34
 5 -10 7 595.085 98.2062 32
 -5 10 -8 41.8623 43.8925 34
 -5 10 -8 110.156 45.0038 9
 -5 10 -8 82.438 40.9504 12
 5 -10 8 76.5742 49.9309 17
 -5 10 -8 88.0334 43.2301 11
 5 -10 8 33.6558 51.715 32
 5 -10 9 104.271 42.296 17
 -5 10 -9 60.088 32.5421 9
 -5 10 -9 -11.186 31.0424 11
 -5 10 -9 23.5134 30.8528 12
 -5 10 -9 40.9745 31.1354 34
 5 -10 9 31.938 33.8827 32
 5 -10 10 102.804 27.841 17
 -5 9 8 794.251 77.1698 23
 5 -9 -8 884.159 73.3375 39
 5 -9 -8 770.511 72.3568 35
 -5 9 8 883.746 82.1387 18
 -5 9 8 888.502 79.119 33
 -5 9 7 43.5425 33.5007 20
 5 -9 -7 37.0779 39.7761 39
 5 -9 -7 51.0448 51.5455 35
 -5 9 7 55.7607 52.8336 33
 -5 9 7 37.3218 51.33 18
 -5 9 6 196.323 46.2262 8
 5 -9 -6 96.5064 49.0638 39
 -5 9 6 193.154 56.325 20
 -5 9 6 92.8156 53.5878 19
 -5 9 6 109.5 57.9824 18
 -5 9 6 162.124 66.2057 33
 5 -9 -5 980.327 108.442 36
 -5 9 5 905.213 118.685 18
 -5 9 5 1083.53 114.701 8
 5 -9 -5 1139.76 128.155 39
 -5 9 5 983.717 116.918 33
 -5 9 5 1111.82 119.235 19
 -5 9 4 3341.74 209.004 19
 -5 9 4 3398.73 207.565 33
 5 -9 -4 3662.6 215.08 36
 5 -9 -4 3661.86 195.298 17
 -5 9 3 1385.52 150.002 9
 -5 9 3 1381.97 139.868 19
 5 -9 -3 1619.69 137.63 17
 5 -9 -3 1521.93 152.893 36
 -5 9 3 1532.49 144.178 33
 -5 9 2 783.687 119.451 9
 5 -9 -2 858.575 127.367 36
 -5 9 2 876.937 113.942 34
 -5 9 2 910.936 114.393 33
 5 -9 -2 906.151 113.435 17
 -5 9 2 803.189 110.523 19
 -5 9 1 980.719 121.689 9
 -5 9 1 1106.94 122.65 19
 5 -9 -1 882.273 128 36
 -5 9 1 980.564 126.824 34
 -5 9 1 1027.13 119.937 33
 5 -9 -1 894.593 111.238 17
 -5 9 0 2287.48 181.798 9
 -5 9 0 2216.17 175.81 34
 -5 9 0 2211.38 164.722 19
 5 -9 0 2351.92 172.36 17
 5 -9 0 2351.26 176.789 32
 -5 9 -1 32.0055 63.1689 9
 -5 9 -1 64.1147 54.812 12
 -5 9 -1 70.72 47.4703 19
 -5 9 -1 94.2968 56.531 34
 5 -9 1 71.0954 52.0568 32
 5 -9 1 96.107 48.7547 17
 -5 9 -2 202.874 72.4144 9
 -5 9 -2 183.602 66.0196 12
 -5 9 -2 326.013 62.4243 19
 -5 9 -2 116.616 69.6231 34
 5 -9 2 216.724 70.6948 32
 5 -9 2 200.769 59.3756 17
 -5 9 -3 754.537 109.298 9
 -5 9 -3 908.855 114.778 12
 -5 9 -3 899.002 121.949 34
 5 -9 3 835.933 111.954 17
 5 -9 3 634.508 106.315 32
 5 -9 4 59.5785 51.2167 17
 -5 9 -4 73.8325 59.0308 9
 -5 9 -4 49.1001 47.4924 12
 -5 9 -4 50.7877 61.3539 34
 5 -9 4 89.6863 61.4531 32
 -5 9 -5 1258.15 134.646 9
 -5 9 -5 1320.3 138.53 12
 5 -9 5 1314.95 138.627 17
 -5 9 -5 1407.75 145.352 34
 5 -9 5 1429.18 153.196 32
 5 -9 6 618.809 102.328 17
 -5 9 -6 655.835 97.6724 9
 -5 9 -6 689.752 108.746 12
 5 -9 6 616.807 108.02 32
 -5 9 -6 864.305 112.524 34
 -5 9 -7 461.814 83.7489 9
 -5 9 -7 523.669 94.0558 12
 -5 9 -7 561.468 94.7114 34
 5 -9 7 492.424 92.1342 17
 5 -9 7 477.163 90.8355 32
 5 -9 8 569.14 92.2814 17
 -5 9 -8 560.192 82.0244 9
 -5 9 -8 641.528 87.5997 34
 -5 9 -8 665.252 90.9239 12
 5 -9 8 556.056 86.7369 32
 -5 9 -9 1293.05 99.7714 9
 -5 9 -9 1166.53 103.186 12
 5 -9 9 1348.91 106.268 32
 -5 9 -9 1182 99.0439 34
 5 -9 9 1378.24 117.304 17
 -5 9 -10 894.658 74.7094 12
 -5 9 -10 736.775 61.7785 34
 -5 9 -10 878.604 73.396 11
 5 -9 10 918.125 80.8139 17
 -5 8 9 973.375 85.6969 23
 5 -8 -9 915.155 79.4439 39
 5 -8 -9 860.32 78.5015 35
 -5 8 9 958.264 86.8609 18
 -5 8 9 891.667 81.5287 33
 -5 8 8 219.942 58.8291 33
 5 -8 -8 194.856 61.6859 35
 -5 8 8 184.389 55.5504 18
 5 -8 -8 203.552 60.1461 39
 5 -8 -7 272.736 81.1657 39
 -5 8 7 271.227 63.256 20
 -5 8 7 250.273 73.9919 19
 -5 8 7 265.404 81.0464 18
 -5 8 7 265.113 82.398 33
 -5 8 6 53.4721 56.175 19
 5 -8 -6 21.5402 48.3552 36
 -5 8 6 107.73 69.9519 18
 -5 8 6 92.9994 62.5596 33
 5 -8 -6 113.792 49.1192 17
 5 -8 -6 100.996 69.5894 39
 -5 8 5 1453.69 150.745 18
 -5 8 5 1312.62 140.725 19
 5 -8 -5 1295.89 127.321 17
 5 -8 -5 1403.97 139.987 36
 -5 8 5 1430.18 143.543 33
 5 -8 -4 741.918 107.755 36
 -5 8 4 726.6 106.408 19
 -5 8 4 870.934 116.574 33
 5 -8 -4 766.685 103.533 17
 -5 8 3 6363.26 295.283 9
 -5 8 3 6673.89 620.636 4
 5 -8 -3 6415.49 587.892 27
 5 -8 -3 5970.71 588.072 25
 -5 8 3 6698.1 299.73 19
 5 -8 -3 6613.39 305.274 36
 -5 8 3 6791.09 291.276 34
 -5 8 3 6344.66 291.35 33
 5 -8 -3 7017.77 294.224 17
 -5 8 2 301.56 76.5147 9
 5 -8 -2 215.89 121.088 27
 5 -8 -2 409.56 155.37 25
 5 -8 -2 157.651 76.3556 36
 -5 8 2 178.267 64.5214 19
 -5 8 2 108.989 57.202 34
 -5 8 2 193.5 61.319 33
 5 -8 -2 191.86 64.9959 17
 -5 8 1 15874.4 448.698 9
 -5 8 1 16913 960.338 30
 -5 8 1 16278.5 951.345 4
 -5 8 1 16728.2 895.836 1
 5 -8 -1 16846.3 946.698 27
 -5 8 1 15985.2 446.295 19
 -5 8 1 16611.3 448.956 34
 5 -8 -1 16589.7 451.238 17
 5 -8 -1 15964.8 464.983 36
 -5 8 1 16267.3 442.686 33
 5 -8 -1 16031.6 440.369 32
 -5 8 0 13584.2 410.294 9
 -5 8 0 14102.5 880.316 30
 -5 8 0 13911.5 885.841 4
 5 -8 0 13293.5 409.088 32
 5 -8 0 13079.8 833.021 27
 -5 8 0 13672.2 415.245 12
 -5 8 0 13432 405.871 19
 -5 8 0 13298.6 403.841 34
 -5 8 0 13580.2 397.16 33
 5 -8 0 13313.5 407.484 17
 -5 8 -1 137.209 56.2337 9
 5 -8 1 -348.477 166.213 27
 -5 8 -1 -265.771 138.681 4
 -5 8 -1 -20.9846 45.2954 12
 -5 8 -1 -25.6953 30.0366 19
 -5 8 -1 20.9946 53.683 34
 5 -8 1 -5.21322 48.021 32
 5 -8 1 -77.717 48.7049 17
 -5 8 -2 2712.32 184.548 19
 -5 8 -2 2660.18 184.015 9
 5 -8 2 2415.89 382.93 27
 -5 8 -2 2560.64 408.14 4
 -5 8 -2 2691.72 185.433 12
 -5 8 -2 2594.97 183.994 34
 5 -8 2 2671.3 187.57 17
 5 -8 2 2599.49 189.703 32
 5 -8 3 -101.403 53.484 17
 5 -8 3 -431.99 193.824 29
 -5 8 -3 52.3189 46.5119 9
 5 -8 3 102.439 128.525 27
 -5 8 -3 521.982 173.987 4
 -5 8 -3 -10.465 39.7623 12
 -5 8 -3 523.04 199.76 3
 -5 8 -3 10.2673 31.9341 19
 -5 8 -3 -8.2961 57.329 34
 5 -8 3 49.2212 51.4767 32
 -5 8 -4 19103.6 489.001 9
 5 -8 4 17608.4 1164.37 29
 -5 8 -4 20946.5 1099.33 4
 5 -8 4 19873.2 1047.14 27
 -5 8 -4 18393.9 492.158 12
 -5 8 -4 18600.7 1046.2 3
 -5 8 -4 18159.2 490.654 34
 -5 8 -4 19392 483.486 19
 5 -8 4 18388.1 496.971 17
 5 -8 4 18145.3 496.699 32
 5 -8 5 706.673 113 17
 -5 8 -5 681.04 104.104 9
 -5 8 -5 594.108 103.108 12
 -5 8 -5 821.883 101.311 19
 -5 8 -5 667.623 102.236 34
 5 -8 5 673.842 108.912 32
 -5 8 -6 140.647 54.1005 9
 -5 8 -6 145.103 56.2939 12
 5 -8 6 151.258 58.3292 17
 -5 8 -6 18.8765 57.5935 34
 5 -8 6 51.1563 56.3193 32
 5 -8 7 -41.4997 53.7098 17
 -5 8 -7 19.6131 46.0406 9
 -5 8 -7 -11.7626 50.8694 12
 -5 8 -7 72.9217 63.0991 34
 5 -8 7 56.9978 66.4953 32
 -5 8 -8 534.75 78.5318 9
 -5 8 -8 548.91 91.7886 12
 5 -8 8 442.075 92.678 17
 -5 8 -8 551.907 91.7759 34
 5 -8 8 486.9 83.9187 32
 -5 8 -9 2868.09 149.653 9
 -5 8 -9 2811.18 166.879 12
 5 -8 9 2795.78 140.691 37
 -5 8 -9 2883.04 165.588 34
 5 -8 9 2856.87 178.732 17
 5 -8 9 2968.92 155.092 32
 5 -8 10 178.461 53.3881 17
 -5 8 -10 133.913 43.349 12
 -5 8 -10 142.23 42.4051 34
 5 -8 10 130.539 24.6755 37
 -5 8 -11 494.977 45.3684 12
 -5 8 -11 450.781 42.1291 11
 5 -8 11 455.022 46.8352 17
 -5 7 10 69.1996 39.1777 23
 5 -7 -10 40.9764 33.7409 39
 5 -7 -10 72.7068 32.4169 35
 -5 7 10 20.7416 24.7835 18
 -5 7 10 34.0451 23.89 33
 5 -7 -9 -27.3709 44.7832 35
 -5 7 9 76.5697 34.5766 24
 -5 7 9 33.2676 51.0682 23
 -5 7 9 -31.7764 42.8331 18
 -5 7 9 15.4786 37.499 33
 5 -7 -9 -24.3922 43.1283 39
 -5 7 8 -8.00973 37.2257 24
 -5 7 8 25.9413 56.1523 19
 5 -7 -8 -0.28294 58.2966 35
 -5 7 8 42.6922 56.2345 18
 -5 7 8 -37.0539 59.3989 33
 5 -7 -8 -20.963 69.0829 39
 -5 7 7 -40.4931 40.7655 24
 5 -7 -7 45.8218 44.569 17
 5 -7 -7 31.9193 63.0402 39
 5 -7 -7 204.427 62.6481 36
 -5 7 7 -18.9575 52.1202 19
 -5 7 7 4.84201 55.8263 18
 -5 7 7 36.475 66.3486 33
 -5 7 6 5.98667 47.7999 24
 5 -7 -6 21.1205 50.1134 39
 -5 7 6 -12.5281 48.6511 19
 -5 7 6 11.7371 52.5897 18
 5 -7 -6 88.0042 49.3554 36
 -5 7 6 19.3839 59.7492 33
 5 -7 -6 31.6652 52.6039 17
 -5 7 5 -38.4516 29.2531 24
 5 -7 -5 -62.318 59.1073 36
 -5 7 5 -21.334 44.9759 19
 -5 7 5 -41.5758 45.5916 33
 5 -7 -5 41.4636 45.4017 17
 -5 7 4 9819.63 360.585 9
 -5 7 4 10894.3 745.169 30
 5 -7 -4 11050.9 759.234 27
 5 -7 -4 10833.3 767.774 25
 5 -7 -4 10842.7 382.022 36
 -5 7 4 10502.7 372.866 33
 -5 7 4 10416.8 373.153 19
 5 -7 -4 10100.3 357.086 17
 -5 7 3 6247.3 281.866 9
 -5 7 3 6823.76 596.924 30
 5 -7 -3 6380.19 567.994 27
 5 -7 -3 6551.87 564.396 25
 -5 7 3 6503.38 539.458 2
 -5 7 3 6482.65 287.934 19
 -5 7 3 6545.2 287.727 33
 -5 7 3 6293.68 268.544 34
 -5 7 3 6853.86 561.858 1
 5 -7 -3 6551.02 296.302 36
 5 -7 -3 6935.59 292.733 17
 -5 7 2 715.859 187.887 1
 -5 7 2 299.226 129.573 30
 -5 7 2 578.013 90.9313 9
 5 -7 -2 835.408 215.444 27
 5 -7 -2 178.628 99.9885 25
 5 -7 -2 615.674 96.0761 36
 -5 7 2 624.222 88.5575 19
 -5 7 2 717.842 100.734 33
 -5 7 2 846.555 215.998 2
 5 -7 -2 487.269 81.568 17
 -5 7 1 7337.59 601.626 30
 -5 7 1 7141.71 618.816 4
 5 -7 -1 6571.04 564.001 27
 5 -7 -1 7527.39 561.751 25
 -5 7 1 7266.92 577.497 1
 -5 7 0 4288.29 461.444 30
 -5 7 0 4830.63 475.068 1
 5 -7 0 4329.72 468.479 29
 -5 7 0 4550.7 490.748 4
 5 -7 0 4191.9 455.721 27
 -5 7 -1 1175.71 281.918 30
 5 -7 1 524.023 177.905 27
 -5 7 -1 1004.69 238.153 4
 -5 7 -1 970.346 217.942 1
 5 -7 2 -0.59608 24.305 17
 5 -7 2 -34.8841 94.7772 29
 5 -7 2 -140.604 141.181 27
 -5 7 -2 275.424 159.645 4
 -5 7 -2 81.8263 52.2503 12
 5 -7 2 180.045 63.0882 32
 -5 7 -3 4964.88 238.379 9
 5 -7 3 4925.24 596.076 29
 -5 7 -3 4986.23 512.814 4
 5 -7 3 4992.11 508.376 27
 -5 7 -3 4994.11 527.715 3
 -5 7 -3 5170.65 249.528 19
 -5 7 -3 5211.8 253.373 12
 -5 7 -3 5327.34 258.364 34
 5 -7 3 5187.69 256.945 17
 5 -7 3 5015.15 254.982 32
 -5 7 -4 16374.5 434.227 9
 5 -7 4 13966.2 1009.17 29
 -5 7 -4 16099.1 932.396 4
 5 -7 4 15816.6 907.257 27
 -5 7 -4 16095.7 444.974 19
 -5 7 -4 16046.3 956.128 3
 -5 7 -4 16156.9 454.854 12
 -5 7 -4 16601.8 462.318 34
 5 -7 4 16495.1 466.262 17
 5 -7 4 15712.5 453.447 32
 5 -7 5 14639.5 1032.58 29
 -5 7 -5 15198.7 910.749 4
 -5 7 -5 14959.9 446.387 12
 -5 7 -5 15807.9 959.844 3
 -5 7 -5 15968.9 446.798 19
 -5 7 -5 14895.5 447.459 34
 5 -7 5 15407.5 457.967 17
 5 -7 5 15167.9 451.561 32
 5 -7 6 578.328 99.0232 17
 -5 7 -6 654.214 103.38 12
 5 -7 6 743.75 102.92 37
 -5 7 -6 649.208 108.027 34
 5 -7 6 630.016 105.894 32
 5 -7 7 35.9426 66.1443 17
 -5 7 -7 -51.5317 67.5259 12
 5 -7 7 31.7891 44.2933 37
 -5 7 -7 97.0648 64.4717 34
 5 -7 7 57.1986 54.6461 32
 -5 7 -8 990.689 121.941 12
 -5 7 -8 1080.63 124.944 34
 5 -7 8 1067.91 117.257 37
 5 -7 8 987.827 122.404 17
 5 -7 8 1084.65 114.312 32
 5 -7 9 251.655 68.8906 17
 -5 7 -9 429.393 84.9907 12
 5 -7 9 377.999 68.5248 37
 -5 7 -9 311.734 67.1355 34
 5 -7 10 286.289 62.4253 17
 -5 7 -10 257.31 59.7482 12
 5 -7 10 245.279 48.7937 37
 -5 7 -10 223.224 50.5564 34
 5 -7 11 220.438 38.056 17
 -5 7 -11 136.513 34.5279 12
 5 -7 11 136.106 25.9663 37
 -5 6 11 53.3809 24.8735 24
 -5 6 11 24.0599 25.0592 23
 5 -6 -11 48.7827 34.9631 39
 5 -6 -11 33.2144 27.2882 35
 -5 6 11 -34.8983 25.7078 18
 -5 6 11 95.5491 24.9276 21
 -5 6 10 2257.99 138.675 24
 -5 6 10 2287.65 143.94 23
 5 -6 -10 2220.76 146.69 39
 5 -6 -10 2157.2 136.486 35
 -5 6 10 2231.57 141.555 18
 -5 6 10 2385.95 140.05 33
 -5 6 9 -3.24998 39.0006 24
 -5 6 9 -27.2613 55.0491 19
 5 -6 -9 31.1194 49.4128 35
 -5 6 9 -5.59147 45.4504 33
 -5 6 9 -47.7475 59.2146 18
 5 -6 -9 -18.5586 62.7249 39
 -5 6 8 52.6035 45.3223 24
 5 -6 -8 41.6884 65.0898 39
 5 -6 -8 138.454 62.0652 36
 -5 6 8 64.3029 66.2049 19
 5 -6 -8 113.49 68.2901 35
 -5 6 8 113.874 58.3848 18
 -5 6 8 26.3685 58.1844 33
 5 -6 -8 69.9369 47.3926 17
 5 -6 -7 359.426 74.2017 17
 -5 6 7 425.096 84.7946 24
 5 -6 -7 391.696 84.8542 39
 5 -6 -7 372.62 84.6481 36
 -5 6 7 342.527 83.2628 19
 -5 6 7 404.274 88.8739 18
 -5 6 7 347.712 88.0441 33
 5 -6 -6 4227.11 504.432 25
 -5 6 6 5519.38 269.093 24
 5 -6 -6 5203.38 262.54 17
 5 -6 -6 5160.54 260.489 36
 5 -6 -6 4927.31 256.464 39
 -5 6 6 5277.67 267.043 18
 -5 6 6 5061.39 263.801 19
 -5 6 6 5081.84 266.165 33
 -5 6 5 8850.8 650.729 30
 5 -6 -5 9281.45 667.089 27
 5 -6 -5 8222.17 678.105 25
 -5 6 5 8772.48 330.449 24
 -5 6 5 8596.76 336.092 19
 -5 6 5 9479.16 666.208 1
 5 -6 -5 8827.45 337.263 36
 5 -6 -5 8702.68 329.789 17
 -5 6 5 8685.11 338.228 33
 -5 6 4 5088.08 250.967 33
 -5 6 4 5040.24 491.892 30
 5 -6 -4 4479.61 449.788 27
 5 -6 -4 4321.1 472.896 25
 5 -6 -4 4918 250.462 36
 -5 6 4 4151.93 228.85 9
 -5 6 4 5206.63 485.561 1
 5 -6 -4 4887.2 242.847 17
 -5 6 4 4792.32 243.835 19
 5 -6 -4 4642.3 576.506 31
 -5 6 3 1872.09 277.461 1
 -5 6 3 1838.56 292.561 30
 5 -6 -3 2024.78 304.415 27
 5 -6 -3 1357.98 274.753 25
 -5 6 3 2045.58 276.666 2
 -5 6 2 256.762 134.81 30
 5 -6 -2 496.597 164.772 27
 -5 6 2 130.3 105.072 1
 5 -6 -2 45.0439 102.563 25
 -5 6 2 -154.51 101.588 2
 -5 6 1 6652.85 539.966 30
 5 -6 -1 6802.37 534.817 27
 5 -6 -1 6637.46 508.435 25
 -5 6 1 5684.51 498.614 1
 -5 6 0 733.929 195.706 30
 5 -6 0 1083.84 222.004 29
 5 -6 0 837.881 174.558 27
 -5 6 0 721.686 215.674 4
 -5 6 0 1050.37 227.475 1
 5 -6 0 925.371 175.66 25
 -5 6 -1 9576.98 646.246 30
 -5 6 -1 9815.39 655.929 1
 5 -6 1 10239.5 722.774 29
 -5 6 -1 9469.28 665.503 4
 5 -6 1 9568.54 649.919 27
 -5 6 -2 5416.53 490.407 30
 5 -6 2 4687.41 532.991 29
 -5 6 -2 4936.03 486.346 4
 5 -6 2 4788.85 474.423 27
 5 -6 3 11691.5 867.298 29
 -5 6 -3 11183.9 734.643 4
 5 -6 3 13437.4 797.868 27
 5 -6 4 265.264 132.901 31
 5 -6 4 364.595 70.9027 17
 5 -6 4 355.543 156.719 29
 -5 6 -4 223.745 139.285 4
 -5 6 -4 427.179 81.1784 12
 5 -6 4 374.722 80.7785 20
 -5 6 -4 445.651 85.3568 34
 5 -6 4 429.55 83.7848 32
 5 -6 5 2631.79 422.273 29
 -5 6 -5 2307.16 362.191 4
 -5 6 -5 2399.84 179.375 12
 -5 6 -5 1954.8 337.56 3
 5 -6 5 2551.64 179.522 37
 5 -6 5 2438.92 193.593 20
 -5 6 -5 2360.16 179.307 34
 5 -6 5 2507.16 185.074 17
 5 -6 5 2141.53 170.207 32
 5 -6 6 213.627 64.4563 17
 -5 6 -6 262.012 82.9715 12
 -5 6 -6 251.632 68.8429 34
 5 -6 6 276.7 79.3689 20
 5 -6 6 279.265 73.3937 37
 5 -6 6 321.066 82.5135 32
 5 -6 7 513.718 96.352 17
 -5 6 -7 570.287 102.636 12
 5 -6 7 485.184 95.4058 20
 5 -6 7 560.367 99.2666 37
 -5 6 -7 586.409 99.7146 34
 5 -6 7 604.119 94.6464 32
 5 -6 8 -3.93634 60.8117 17
 -5 6 -8 67.2914 67.4152 12
 5 -6 8 60.7747 60.6516 37
 -5 6 -8 189.486 67.9805 34
 5 -6 9 144.948 64.6172 17
 -5 6 -9 107.108 63.8469 12
 5 -6 9 40.3699 45.1734 37
 -5 6 -9 189.565 65.8928 34
 5 -6 10 68.7868 44.2812 17
 -5 6 -10 100.999 52.5029 12
 5 -6 10 96.8512 44.3324 37
 -5 6 -10 64.5374 40.8405 34
 -5 6 -11 743.786 67.1623 12
 5 -6 11 827.295 67.5009 37
 -5 6 -11 655.117 56.49 34
 5 -6 11 642.843 56.5947 17
 -5 5 12 1211.12 75.0293 24
 5 -5 -12 1338.62 85.1479 39
 5 -5 -11 -6.63924 31.0023 35
 -5 5 11 -78.4931 41.531 24
 -5 5 11 4.43406 33.0904 23
 5 -5 -11 -6.57285 41.3144 39
 -5 5 11 -67.5807 35.2967 18
 -5 5 11 19.7525 22.8577 33
 -5 5 10 238.206 70.32 24
 -5 5 10 187.087 58.7301 23
 5 -5 -10 239.906 71.5995 39
 -5 5 10 187.816 50.2422 38
 5 -5 -10 199.055 63.3867 35
 -5 5 10 212.977 60.7045 18
 -5 5 10 240.148 57.0227 33
 -5 5 9 129.211 56.9455 24
 5 -5 -9 61.8186 60.2641 39
 -5 5 9 87.6482 38.7379 38
 5 -5 -9 89.3118 50.3423 36
 -5 5 9 257.623 72.5368 19
 5 -5 -9 241.569 78.3007 35
 -5 5 9 152.758 60.7189 18
 -5 5 9 201.754 69.9855 33
 -5 5 8 -95.9652 51.9753 24
 5 -5 -8 28.0519 49.4176 39
 5 -5 -8 -44.3618 46.1045 36
 -5 5 8 42.9164 63.5578 19
 5 -5 -8 -37.4073 55.1278 35
 -5 5 8 -42.0829 54.769 18
 -5 5 8 15.8984 51.7018 33
 5 -5 -8 -29.9228 52.361 17
 5 -5 -7 2926.1 412.878 25
 -5 5 7 2796.71 196.385 24
 5 -5 -7 2762.21 191.316 36
 -5 5 7 2629.65 189.286 18
 5 -5 -7 2633.53 188.322 17
 -5 5 7 2963.03 200.415 33
 5 -5 -7 2738.59 191.971 39
 -5 5 7 2800.39 196.578 19
 5 -5 -6 1276.14 275.863 25
 -5 5 6 1524.92 142.064 24
 -5 5 6 1520.9 288.953 1
 5 -5 -6 1623.19 146.797 39
 5 -5 -6 1508.35 139.079 36
 -5 5 6 1454.74 141.266 33
 5 -5 -6 1521.79 145.736 17
 -5 5 6 1344.19 139.505 19
 5 -5 -5 950.633 242.43 31
 -5 5 5 852.576 198.944 30
 5 -5 -5 1430.43 246.364 27
 5 -5 -5 1029.76 236.686 25
 -5 5 5 1088.82 246.268 1
 5 -5 -4 1914.39 369.017 31
 -5 5 4 2475.98 321.351 30
 5 -5 -4 2241.25 303.72 27
 5 -5 -4 2441.07 346.94 25
 -5 5 4 2378.63 343.933 1
 -5 5 3 696.801 172.977 30
 5 -5 -3 794.959 180.015 27
 5 -5 -3 774.483 192.042 25
 -5 5 3 1090.71 225.367 1
 -5 5 2 351.743 162.908 30
 5 -5 -2 126.614 101.005 27
 5 -5 -2 298.765 117.009 25
 -5 5 2 496.313 185.033 1
 -5 5 1 437.305 135.041 30
 5 -5 -1 541.178 147.895 27
 -5 5 1 389.953 152.608 1
 5 -5 -1 410.706 149.773 25
 -5 5 0 2700.47 330.072 30
 5 -5 0 2640.32 344.771 29
 5 -5 0 2486.8 317.834 27
 -5 5 0 2892.48 347.26 1
 -5 5 -1 22990.3 934.775 30
 5 -5 1 22410.8 1015.64 29
 -5 5 -1 23246.9 967.976 4
 5 -5 1 21837.4 937.502 27
 -5 5 -1 23614.5 953.407 1
 -5 5 -2 3420.84 378.041 30
 5 -5 2 3695.7 458.302 29
 -5 5 -2 3952.09 408.744 4
 -5 5 -2 4310.97 361.662 28
 -5 5 -2 4148.9 405.332 1
 5 -5 2 3951.29 411.573 27
 -5 5 -3 1333.84 240.462 30
 5 -5 3 1465.1 319.579 29
 5 -5 3 1040.32 248.589 27
 -5 5 -3 1309.35 252.162 4
 5 -5 3 1023.74 288.66 31
 5 -5 4 10028 752.664 29
 -5 5 -4 8924.68 632.94 4
 -5 5 -4 7698.26 618.529 3
 5 -5 5 4688.68 527.194 29
 -5 5 -5 4401.68 458.026 4
 -5 5 -5 4289.7 466.802 3
 -5 5 -5 4848.7 249.279 12
 5 -5 5 4870.91 258.885 20
 5 -5 5 4873.33 245.172 37
 -5 5 -5 4621.19 241.393 34
 5 -5 5 4889.77 253.202 17
 5 -5 5 4147.16 226.553 32
 5 -5 6 578.448 98.8948 17
 5 -5 6 338.362 151.017 29
 -5 5 -6 433.119 89.9225 12
 5 -5 6 548.888 99.9516 20
 5 -5 6 313.308 74.6156 37
 -5 5 -6 442.15 165.952 3
 -5 5 -6 579.542 100.105 34
 -5 5 -7 2967.37 204.153 12
 5 -5 7 3027.98 205.256 37
 -5 5 -7 3084.13 205.235 34
 5 -5 7 2703.41 194.236 17
 5 -5 7 2876.55 199.443 20
 5 -5 8 -23.4906 42.4976 17
 -5 5 -8 8.80759 57.277 12
 5 -5 8 35.7892 45.7203 20
 5 -5 8 -12.2553 58.7859 37
 -5 5 -8 -40.7771 62.44 34
 -5 5 -9 997.891 118.819 12
 5 -5 9 795.447 107.842 37
 -5 5 -9 924.416 110.008 34
 5 -5 9 910.026 105.404 17
 5 -5 10 44.995 36.0695 17
 -5 5 -10 96.6355 51.869 12
 5 -5 10 111.62 50.7979 37
 -5 5 -10 137.079 55.6426 34
 -5 5 -11 133.327 39.5478 12
 -5 5 -11 116.756 32.2039 34
 5 -5 11 152.942 37.8403 37
 -5 4 12 -10.7651 39.6416 24
 5 -4 -12 -14.0531 27.887 35
 5 -4 -12 17.9315 36.5135 39
 -5 4 12 -9.60583 22.1098 38
 -5 4 11 376.724 76.4962 24
 -5 4 11 350.449 64.113 23
 5 -4 -11 314.938 76.2716 39
 -5 4 11 295.453 61.4185 38
 5 -4 -11 303.654 64.8316 35
 -5 4 11 282.165 53.8779 18
 -5 4 10 156.253 51.4769 18
 -5 4 10 139.936 62.4059 24
 -5 4 10 174.034 60.4062 23
 5 -4 -10 235.954 57.3923 36
 5 -4 -10 166.345 60.8914 35
 -5 4 10 248.569 61.4526 38
 -5 4 10 191.113 56.7377 33
 5 -4 -10 137.517 63.1231 39
 -5 4 9 1404.09 146.344 24
 5 -4 -9 1497.18 146.139 39
 -5 4 9 1516.71 138.21 38
 5 -4 -9 1366.35 134.122 36
 -5 4 9 1305.79 134.981 19
 5 -4 -9 1460.48 140.123 35
 -5 4 9 1735.93 150.605 18
 -5 4 9 1421.25 134.885 33
 -5 4 8 690.784 104.473 24
 5 -4 -8 762.239 107.899 39
 -5 4 8 667.53 96.6301 38
 5 -4 -8 507.242 92.5226 36
 -5 4 8 564.326 98.9086 19
 5 -4 -8 651.58 107.365 35
 -5 4 8 630.236 92.7763 18
 -5 4 8 429.234 79.5109 33
 5 -4 -8 647.297 99.9266 17
 -5 4 7 2583.65 351.721 1
 5 -4 -7 3142.53 416.608 25
 -5 4 7 2744.81 190.517 19
 -5 4 7 2963.03 200.562 24
 5 -4 -7 2416.15 171.465 7
 5 -4 -7 2897.34 192.951 36
 5 -4 -7 2715.31 187.405 39
 5 -4 -7 3052.84 201.792 35
 -5 4 7 3024.98 193.964 18
 5 -4 -7 2894.62 193.824 17
 -5 4 7 2949.03 193.515 33
 -5 4 6 -193.024 97.8198 30
 -5 4 6 80.1125 101.863 1
 5 -4 -6 -170.83 127.64 25
 5 -4 -5 2724.03 357.817 31
 -5 4 5 2309.22 323.617 30
 5 -4 -5 2729.94 312.404 27
 5 -4 -5 2140.62 331.931 25
 -5 4 5 2504.86 341.647 1
 5 -4 -4 582.132 228.787 31
 -5 4 4 244.781 136.043 30
 5 -4 -4 463.571 127.457 27
 -5 4 4 439.651 166.803 1
 5 -4 -4 294.673 165.578 25
 5 -4 -3 163.61 189.486 31
 -5 4 3 76.4286 112.522 30
 5 -4 -3 -65.058 51.28 27
 5 -4 -3 405.048 158.57 25
 -5 4 3 182.368 159.165 1
 -5 4 2 11297.5 644.029 30
 5 -4 -2 11966.4 618.85 27
 5 -4 -2 11794.3 633.027 25
 -5 4 2 12352.5 663.379 1
 5 -4 -2 9686.99 730.064 31
 5 -4 -1 419.704 291.723 31
 -5 4 1 248.123 122.946 30
 5 -4 -1 319.065 108.585 27
 5 -4 -1 355.48 123.88 25
 -5 4 1 159.011 80.465 1
 -5 4 0 22894.8 881.729 30
 5 -4 0 24178.5 891.764 29
 5 -4 0 24393.6 912.887 27
 -5 4 0 24180.8 909.91 1
 -5 4 -1 6115.12 460.142 30
 -5 4 -1 6478.7 483.335 4
 5 -4 1 6161.49 486.172 29
 5 -4 1 6338.01 488.201 27
 -5 4 -1 6256.35 478.101 1
 5 -4 1 6453.75 582.727 31
 -5 4 -2 35.6809 90.5042 30
 5 -4 2 -215.112 136.486 29
 -5 4 -2 190.509 87.0869 28
 5 -4 2 -96.6069 134.418 27
 -5 4 -2 159.256 93.8717 4
 -5 4 -2 -19.9878 66.4466 1
 5 -4 2 -204.744 157.407 31
 5 -4 3 20960.4 983.068 29
 -5 4 -3 21033.1 863.809 28
 -5 4 -3 22263.8 921.361 4
 5 -4 3 21722.5 973.008 31
 5 -4 4 1021.16 251.894 29
 -5 4 -4 1602.6 247.592 28
 -5 4 -4 1038.35 203.564 4
 -5 4 -4 1635.03 272.816 3
 5 -4 5 87.85 41.3602 17
 -5 4 -5 105.92 76.4695 28
 -5 4 -5 211.23 68.8532 12
 5 -4 5 110.35 56.201 38
 5 -4 5 153.077 56.7439 37
 5 -4 5 229.921 70.9826 20
 -5 4 -5 151.073 65.4233 34
 5 -4 6 -59.0123 41.9764 17
 5 -4 6 162.447 124.046 29
 -5 4 -6 -22.318 55.5676 12
 5 -4 6 -9.30691 34.7196 38
 5 -4 6 -5.62954 48.7307 20
 5 -4 6 77.1178 58.2527 37
 -5 4 -6 -15.7711 49.2164 34
 -5 4 -7 1585.71 152.188 12
 5 -4 7 1777.07 159.002 20
 5 -4 7 1754.47 148.355 38
 5 -4 7 1642.33 156.324 37
 -5 4 -7 1630.69 155.283 34
 5 -4 7 1970.52 163.325 17
 5 -4 8 32.7179 40.1969 17
 -5 4 -8 89.1263 55.0485 12
 5 -4 8 66.1872 51.8531 38
 5 -4 8 -5.39504 49.2403 20
 5 -4 8 66.3003 60.9042 37
 -5 4 -8 112.616 68.2251 34
 5 -4 9 6.57497 34.0925 17
 -5 4 -9 -41.4375 55.4202 12
 5 -4 9 2.41766 29.9208 38
 5 -4 9 37.2786 40.9416 20
 5 -4 9 -21.9316 67.1732 37
 -5 4 -9 -24.1483 58.0695 34
 5 -4 10 18.0413 23.2441 17
 -5 4 -10 5.5532 46.0166 12
 5 -4 10 -27.6775 24.8395 38
 5 -4 10 -22.7408 44.5422 37
 -5 4 -10 57.2318 47.6525 34
 -5 4 -11 293.281 43.2141 12
 5 -4 11 234.27 41.1096 37
 -5 4 -11 224.878 35.5365 34
 -5 3 13 706.432 68.6503 24
 5 -3 -13 662.073 64.6988 39
 -5 3 13 619.014 57.9931 38
 5 -3 -13 583.264 49.6725 35
 -5 3 12 -14.6254 43.86 24
 -5 3 12 -13.624 23.1526 37
 5 -3 -12 17.5973 43.7342 39
 -5 3 12 -28.5529 40.7772 38
 5 -3 -12 25.6018 39.2934 35
 -5 3 11 422.651 87.1635 24
 5 -3 -11 392.219 80.5029 39
 -5 3 11 333.949 70.4555 37
 5 -3 -11 418.477 69.5458 36
 5 -3 -11 430.127 74.8594 35
 -5 3 11 497.318 84.5898 38
 -5 3 10 7377.52 312.091 24
 -5 3 10 8545.22 305.18 23
 5 -3 -10 6903.1 294.271 39
 -5 3 10 6952.68 293.912 38
 -5 3 10 7769.48 303.986 19
 5 -3 -10 8134.19 307.056 36
 5 -3 -10 7654.84 288.065 10
 5 -3 -10 7407.15 293.741 35
 -5 3 9 416.616 86.3185 24
 5 -3 -9 301.39 75.0745 39
 5 -3 -9 323.948 64.7556 10
 5 -3 -9 341.274 83.5852 36
 -5 3 9 348.213 76.6554 19
 5 -3 -9 289.646 70.5618 35
 -5 3 9 408.237 81.6378 33
 -5 3 9 299.515 73.0253 38
 5 -3 -8 290.232 125.018 25
 -5 3 8 -1.90223 45.295 24
 5 -3 -8 59.9924 42.332 7
 5 -3 -8 -58.569 50.6798 39
 5 -3 -8 173.924 54.8929 36
 -5 3 8 -74.4339 42.0704 19
 5 -3 -8 144.351 55.3239 10
 -5 3 8 -103.032 54.3887 33
 5 -3 -8 23.0554 47.4343 17
 -5 3 8 144.085 94.8092 1
 5 -3 -7 152.078 149.36 25
 -5 3 7 46.5726 51.1931 24
 5 -3 -7 110.463 52.1837 7
 5 -3 -7 0.56913 19.8855 39
 5 -3 -7 113.453 47.9104 36
 -5 3 7 117.154 47.4595 19
 -5 3 7 74.9123 135.53 1
 5 -3 -7 7.55219 45.9936 17
 -5 3 6 1162.94 236.227 30
 5 -3 -6 776.595 215.555 25
 -5 3 6 600.744 204.954 1
 -5 3 5 5026 457.821 30
 5 -3 -5 4912.11 452.475 25
 -5 3 5 5092.84 453.483 1
 5 -3 -5 5780.39 480.076 31
 -5 3 4 18968 840.565 30
 5 -3 -4 20921.2 760.185 27
 5 -3 -4 18203.6 822.593 25
 -5 3 4 18870.7 823.786 1
 5 -3 -4 18824.8 878.328 31
 -5 3 3 2129.93 294.006 30
 5 -3 -3 2582.46 270.104 27
 5 -3 -3 2147.84 303.034 25
 -5 3 3 2070.39 272.018 1
 5 -3 -3 2487.06 359.279 31
 -5 3 2 5954.32 455.122 30
 5 -3 -2 5199.49 393.287 27
 5 -3 -2 5365.97 431.647 25
 -5 3 2 5155.79 429.295 1
 5 -3 -2 5328.72 498.778 31
 -5 3 1 30130.2 983.218 30
 5 -3 -1 29104.7 934.294 27
 -5 3 1 30672.3 987.172 1
 5 -3 -1 30752.5 1140.22 31
 -5 3 0 17170.2 736.81 30
 5 -3 0 19153.9 672.447 29
 5 -3 0 17241.7 737.677 27
 -5 3 0 17099 728.957 1
 5 -3 0 18735 626.632 5
 5 -3 0 17887.8 858.705 31
 5 -3 1 536.713 185.233 31
 -5 3 -1 929.024 185.457 30
 5 -3 1 612.402 148.186 29
 -5 3 -1 652.202 176 1
 5 -3 1 941.845 200.622 27
 -5 3 -1 511.368 134.053 4
 5 -3 2 1069.28 232.592 31
 -5 3 -2 1274.18 200.643 30
 5 -3 2 1113.95 219.124 29
 -5 3 -2 1267.71 227.727 28
 -5 3 -2 1206.02 202.302 4
 -5 3 -2 1048.05 203.63 1
 5 -3 3 2866.63 346.601 29
 -5 3 -3 2106.63 292.679 28
 -5 3 -3 2444.71 279.28 4
 5 -3 3 2480.78 305.364 31
 5 -3 4 3052.98 386.288 29
 -5 3 -4 3691.6 409.176 28
 -5 3 -4 3000.94 368.188 3
 5 -3 5 19152 983.923 29
 -5 3 -5 19110.4 948.674 28
 -5 3 -5 20434.4 493.84 12
 5 -3 5 19633.5 495.168 20
 5 -3 5 20061.5 499.735 37
 -5 3 -5 19850.9 493.338 34
 5 -3 5 18877.3 474.559 17
 5 -3 5 19575.8 477.324 38
 5 -3 6 67.5844 38.1104 17
 5 -3 6 -281.216 156.002 5
 5 -3 6 -318.496 178.388 29
 -5 3 -6 660.539 208.71 28
 5 -3 6 335.534 138.257 2
 -5 3 -6 73.8607 62.406 34
 -5 3 -6 92.2762 61.5638 12
 5 -3 6 55.2485 51.5638 38
 5 -3 6 102.111 54.6664 37
 5 -3 6 -20.5545 41.2785 20
 -5 3 -7 5308.25 261.277 12
 5 -3 7 5152.29 255.199 38
 5 -3 7 5132.81 261.957 37
 5 -3 7 5380.55 267.599 20
 -5 3 -7 4792.57 252.414 34
 5 -3 7 5522.35 255.893 17
 -5 3 -8 3967.14 220.206 12
 5 -3 8 4021.7 228.945 20
 5 -3 8 4239.61 226.109 38
 5 -3 8 4091.23 228.463 37
 -5 3 -8 3823.16 220.368 34
 -5 3 -9 436.493 80.4045 12
 5 -3 9 479.405 76.7658 38
 5 -3 9 455.927 77.9011 20
 5 -3 9 493.637 87.9192 37
 -5 3 -9 527.047 95.5041 34
 -5 3 -10 923.157 90.1099 12
 5 -3 10 808.607 74.0004 20
 5 -3 10 943.174 88.3936 37
 5 -3 10 938.571 80.9009 38
 -5 3 -10 946.864 91.2739 34
 -5 3 -11 57.4839 22.4468 12
 5 -3 11 8.11061 17.9492 37
 -5 2 13 378.785 59.1792 24
 5 -2 -13 370.936 42.5616 13
 5 -2 -13 447.359 64.5684 39
 -5 2 13 419.23 63.4382 38
 -5 2 13 389.714 53.6235 37
 5 -2 -13 459.99 54.1963 35
 -5 2 12 1317.32 121.96 24
 5 -2 -12 1300.63 116.626 39
 -5 2 12 1424.69 124.793 38
 -5 2 12 1426.4 119.223 37
 5 -2 -12 1309.51 103.6 36
 5 -2 -12 1291.82 107.922 35
 -5 2 11 63.2572 60.6764 24
 5 -2 -11 78.4409 48.9072 39
 -5 2 11 56.7054 51.765 38
 5 -2 -11 98.1965 54.1004 36
 5 -2 -11 102.934 49.7194 35
 5 -2 -11 130.564 53.7224 10
 -5 2 10 2573.15 188.145 24
 5 -2 -10 2407.41 177.14 36
 5 -2 -10 2561.09 184.211 39
 -5 2 10 2512.95 182.663 38
 5 -2 -10 2700.36 178.214 35
 5 -2 -10 2829.02 187.555 10
 -5 2 9 4501.62 498.607 1
 -5 2 9 4744.45 254.706 24
 5 -2 -9 4714.57 245.936 39
 -5 2 9 5123.54 248.109 19
 5 -2 -9 5000.69 256.329 36
 5 -2 -9 4847.23 237.343 35
 5 -2 -9 4943.31 252.451 10
 -5 2 8 872.362 202.36 30
 5 -2 -8 686.936 185.955 25
 -5 2 8 926.608 118.441 24
 5 -2 -8 1123.99 125.061 7
 5 -2 -8 988.995 112.572 39
 5 -2 -8 1113.14 124.054 36
 5 -2 -8 1117.38 121.595 10
 -5 2 8 843.555 222.486 1
 5 -2 -8 1119.7 125.152 17
 5 -2 -8 976.386 111.782 32
 -5 2 7 1398.2 251.798 30
 5 -2 -7 932.962 228.86 25
[truncated: 216,871 more chars]
